# Supplementary material
Source: PubMed Central journal article supplement (PMC6568270)

## Supporting Information Part B

### **Preparation of Chiral Allenes through Pd-Catalyzed Intermolecular Hydroamination of Conjugated Enynes: Enantioselective Synthesis Enabled by Catalyst Design**

Nathan J. Adamson, Haleh Jeddi, and Steven J. Malcolmson\*

*Department of Chemistry, Duke University  
Durham, North Carolina 27708 USA*

*E-mail: [steven.malcolmson@duke.edu](mailto:steven.malcolmson@duke.edu)*

**$^1\text{H}$  NMR ( $\text{CDCl}_3$ )**  
400 MHz

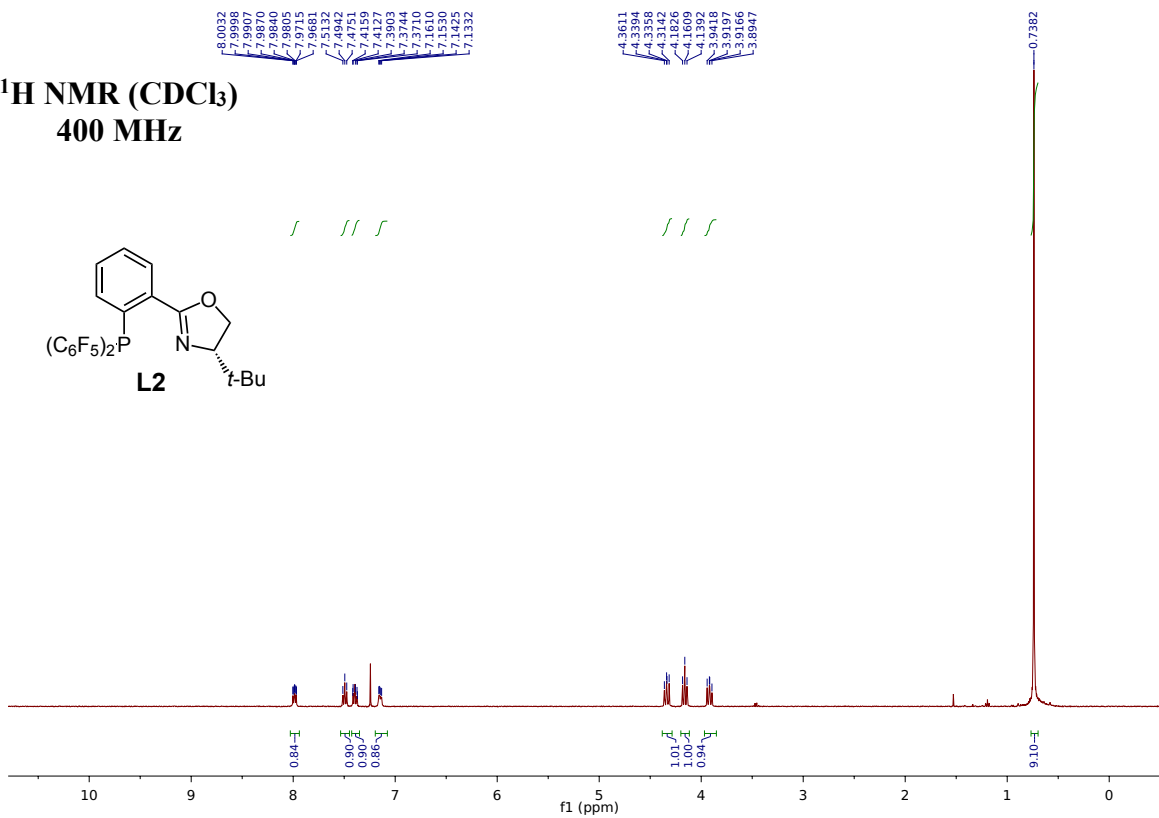

**$^{13}\text{C}$  NMR ( $\text{CDCl}_3$ )**  
125 MHz

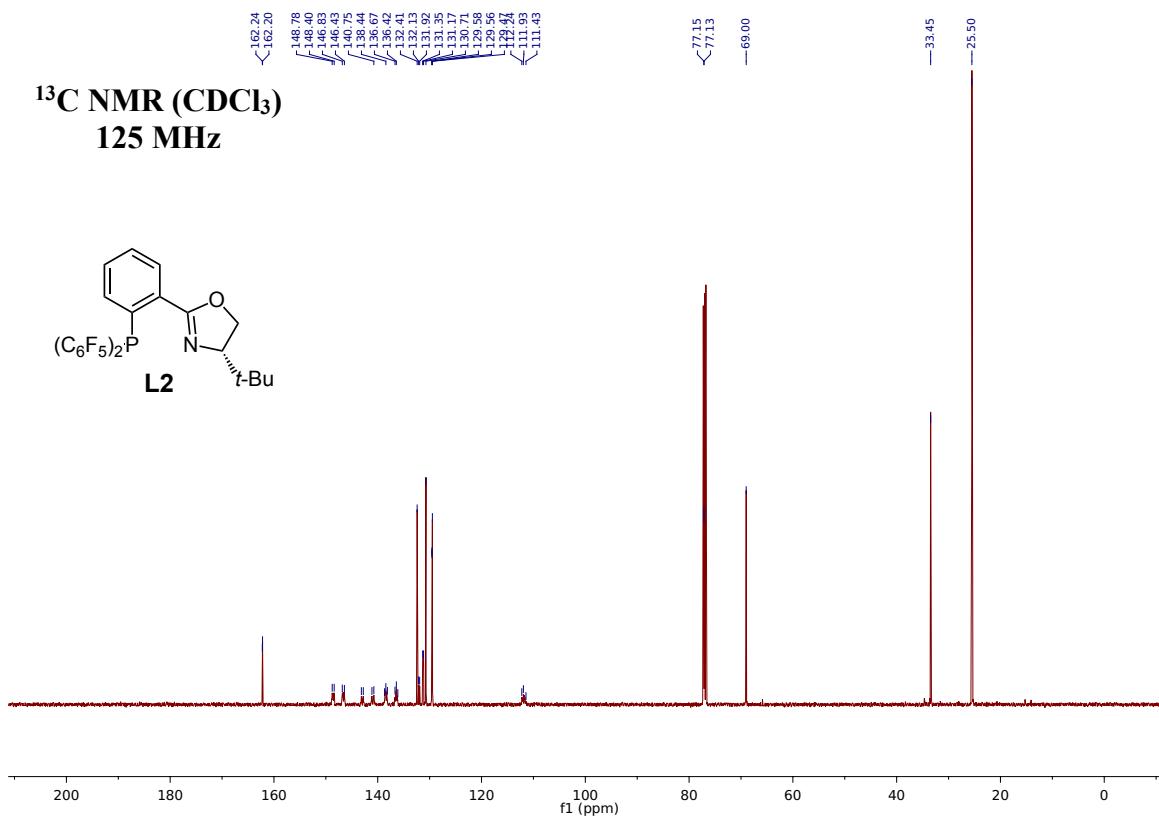

**$^{19}\text{F}$  NMR ( $\text{CDCl}_3$ )**  
**376 MHz**

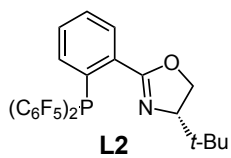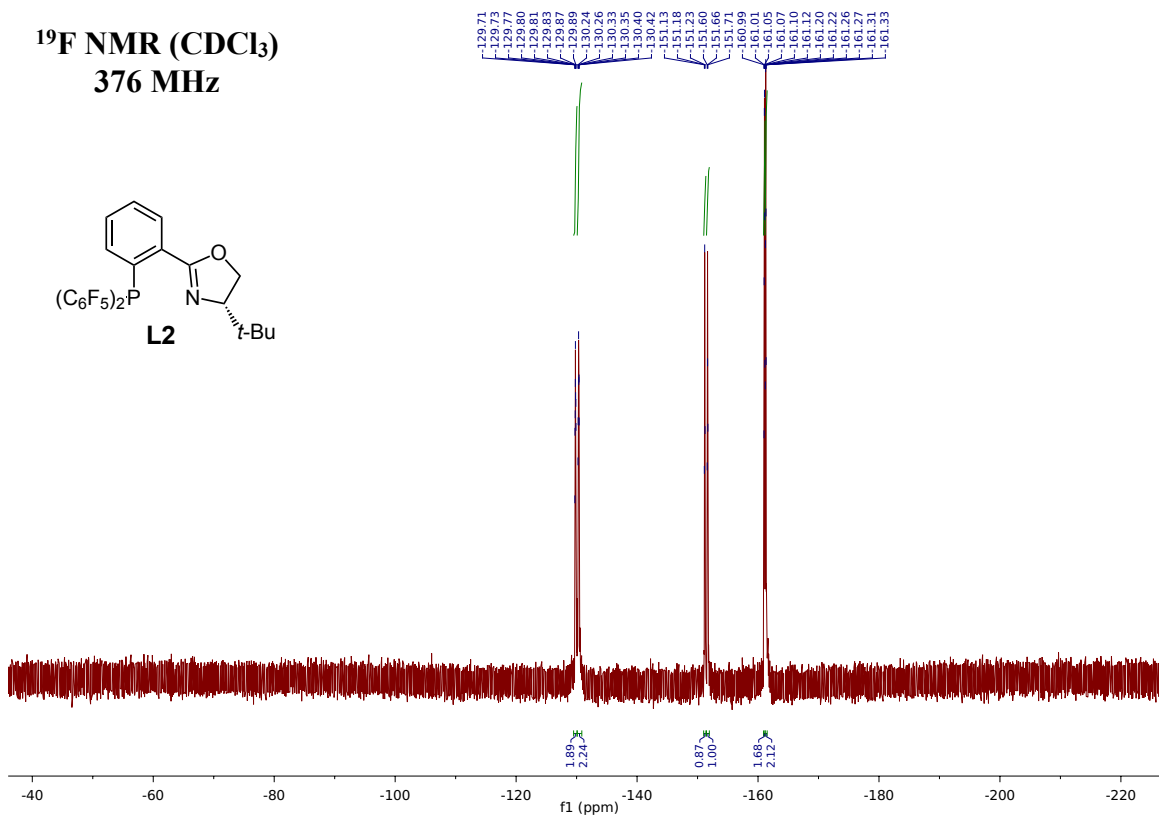

**$^{31}\text{P}$  NMR ( $\text{CDCl}_3$ )**  
**162 MHz**

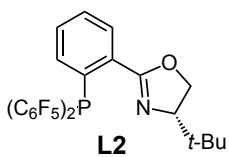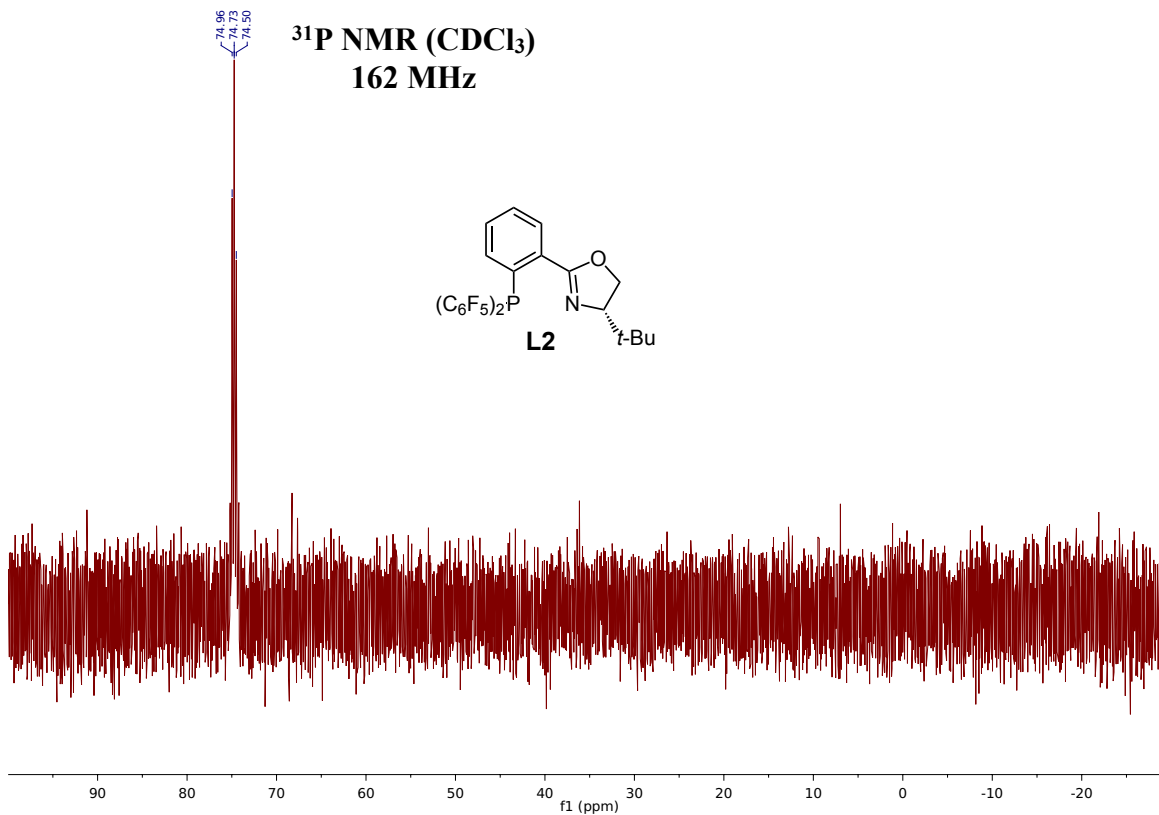

**$^1\text{H}$  NMR ( $\text{CDCl}_3$ )  
400 MHz**

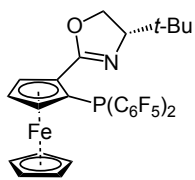

**L3**

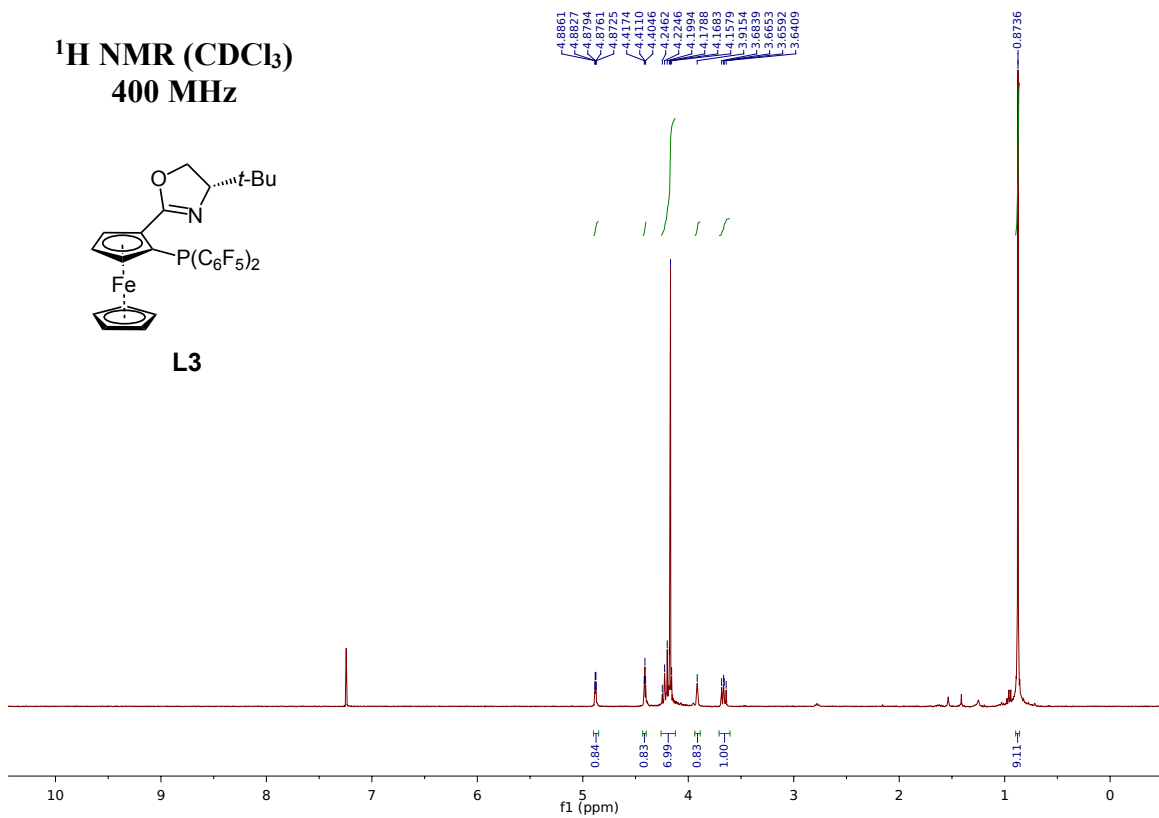

**$^{13}\text{C}$  NMR ( $\text{CDCl}_3$ )  
125 MHz**

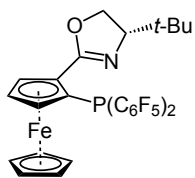

**L3**

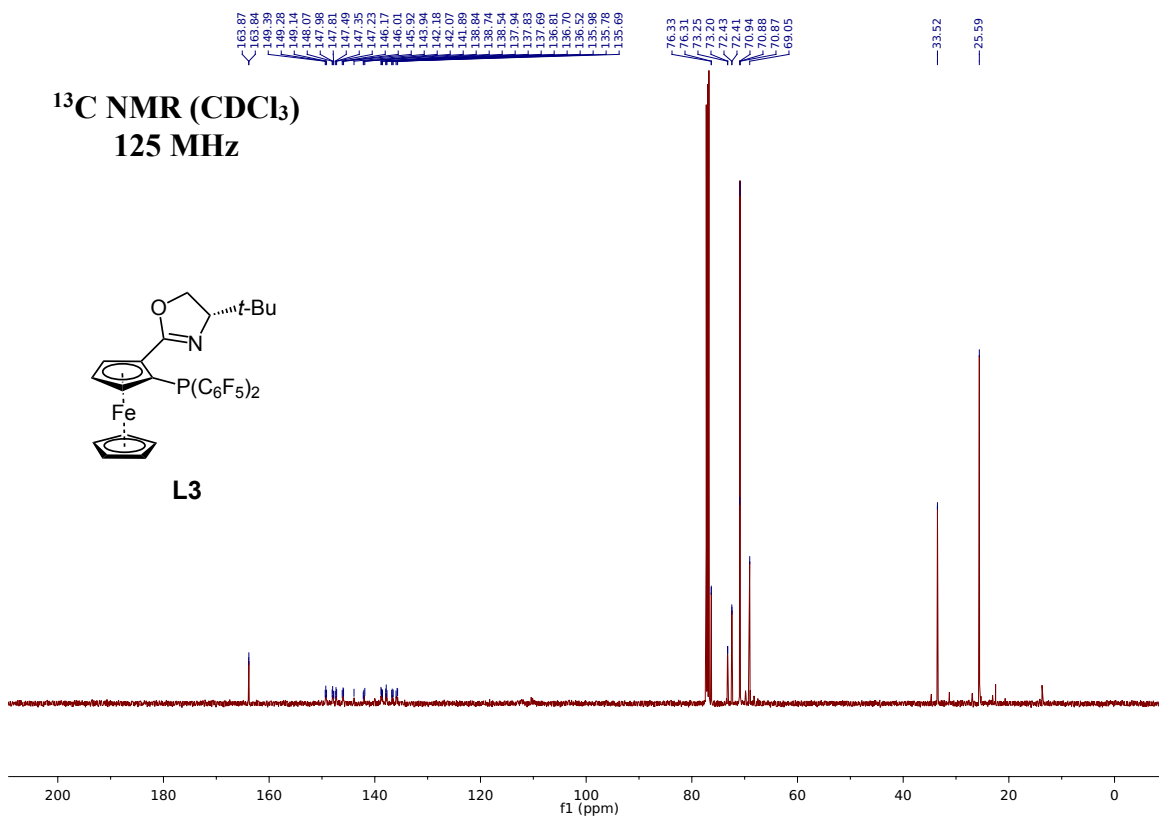

<sup>19</sup>F NMR (CDCl<sub>3</sub>)  
376 MHz

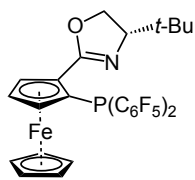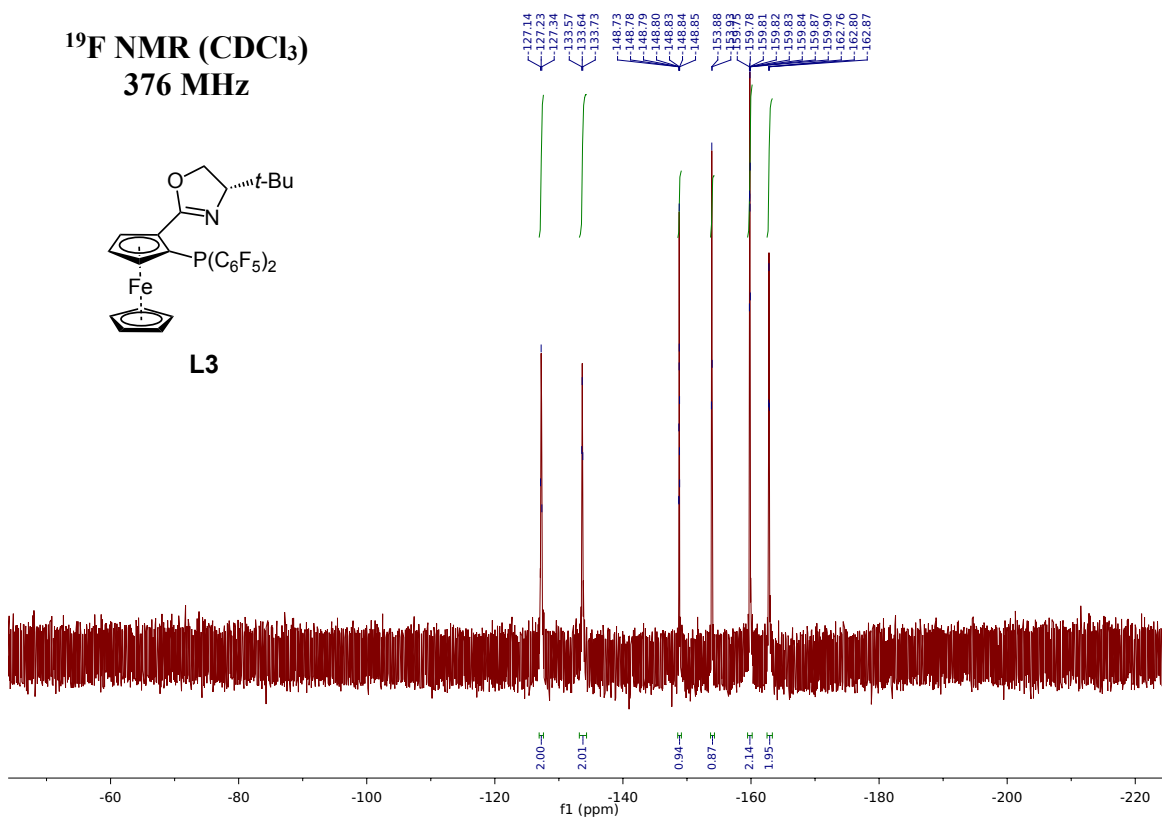

<sup>31</sup>P NMR (CDCl<sub>3</sub>)  
162 MHz

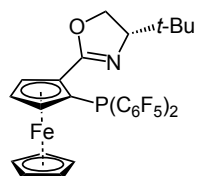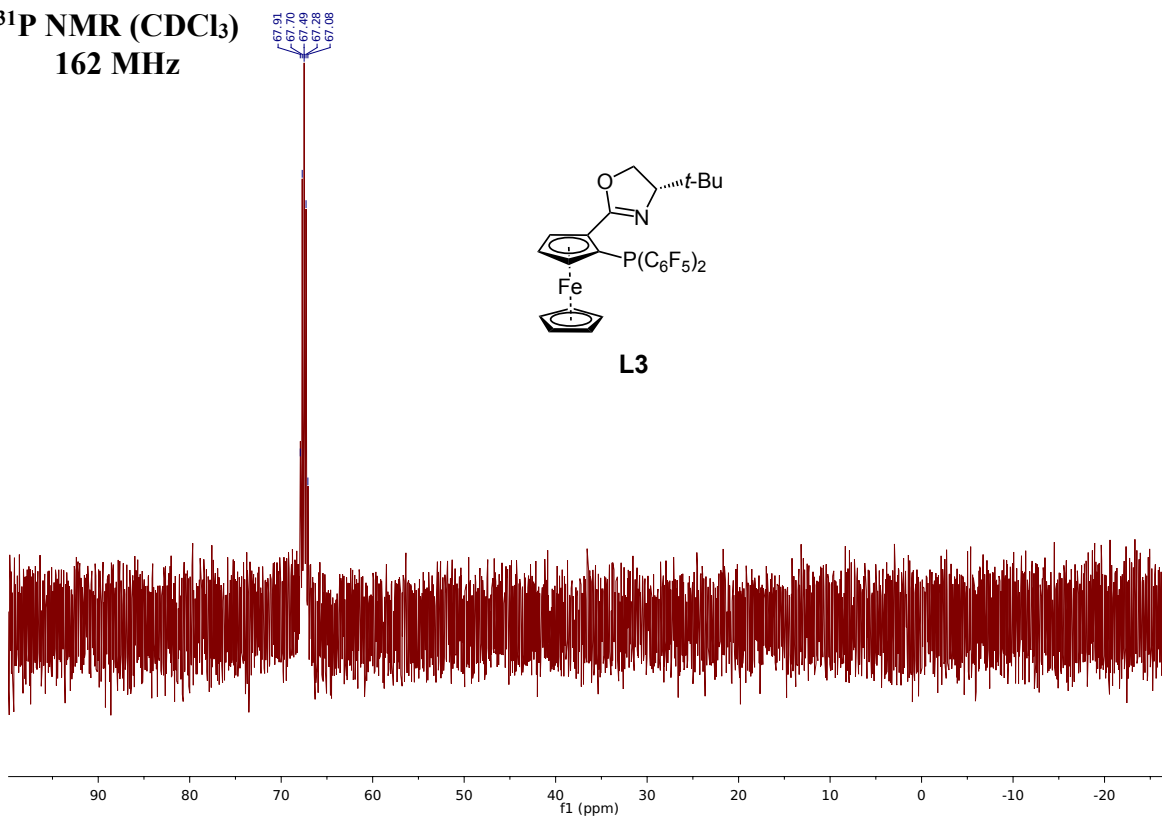

**<sup>1</sup>H NMR (CDCl<sub>3</sub>)  
400 MHz**

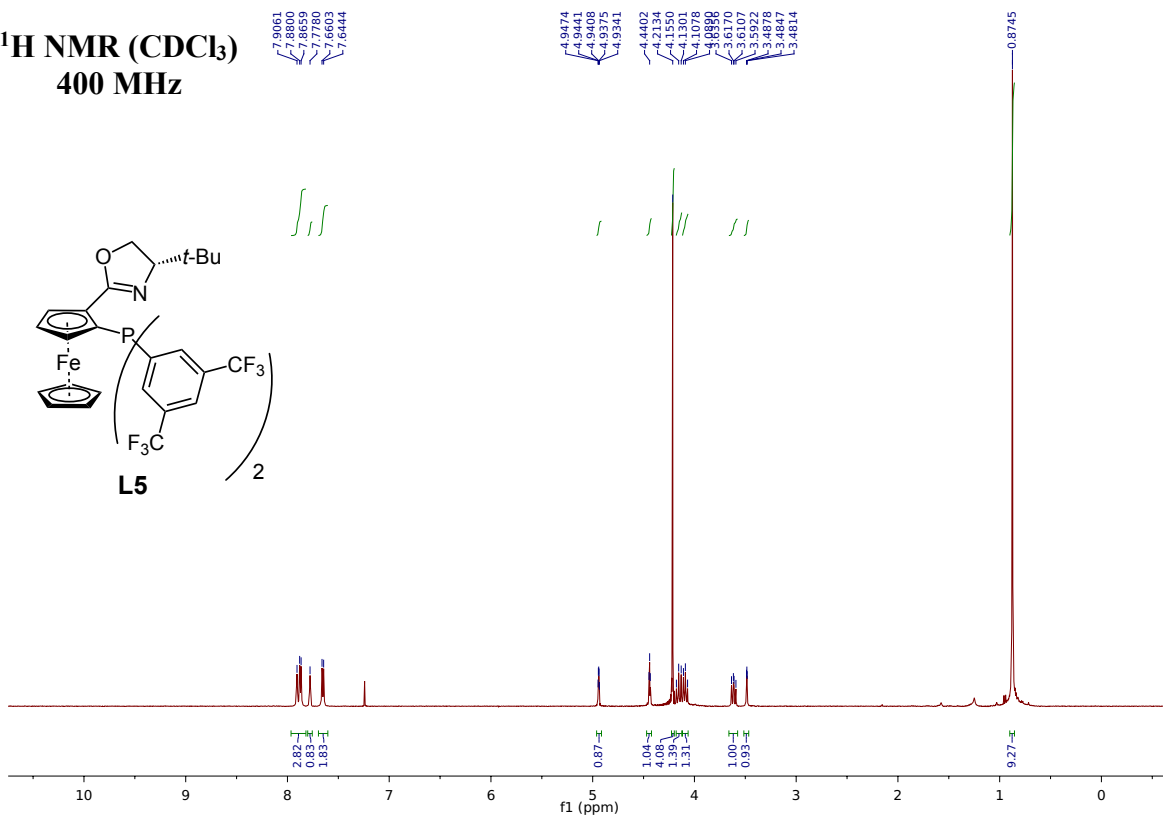

**<sup>13</sup>C NMR (CDCl<sub>3</sub>)  
125 MHz**

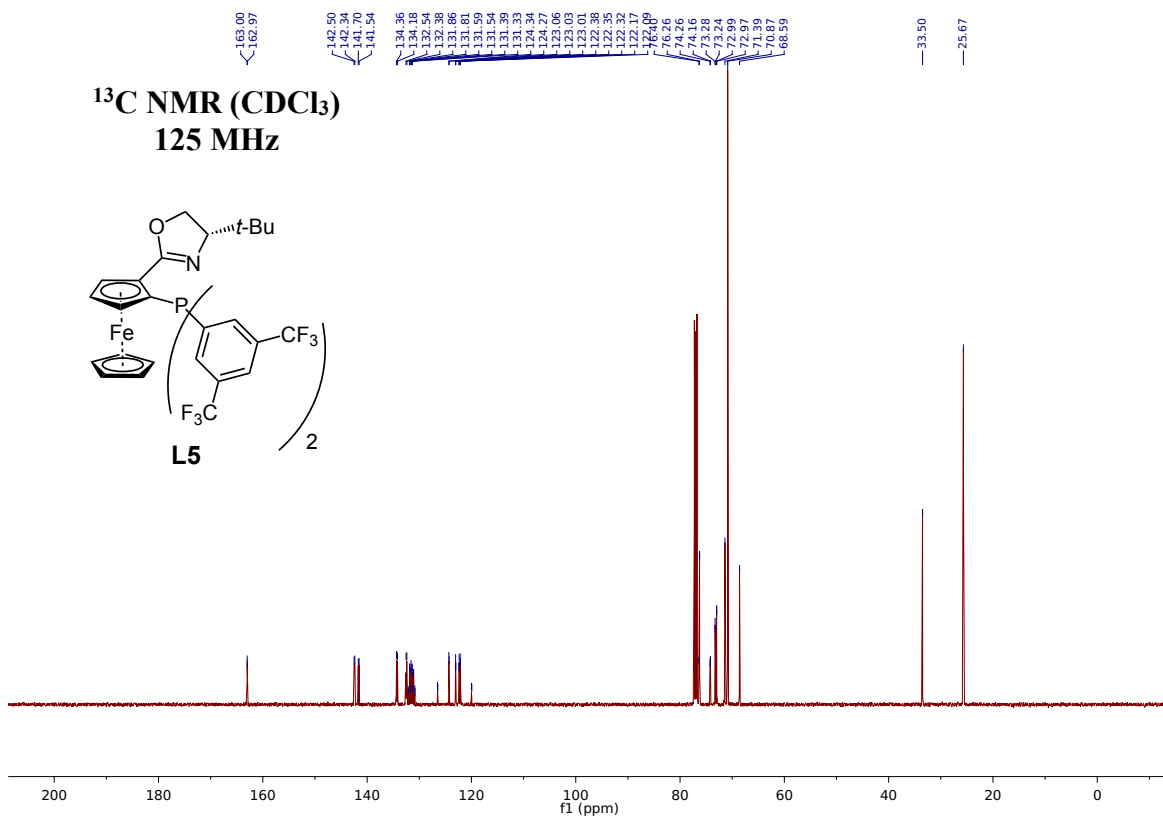

**$^{19}\text{F}$  NMR ( $\text{CDCl}_3$ )**  
**376 MHz**

← -62.89  
← -62.97

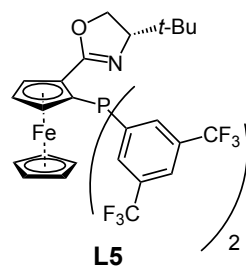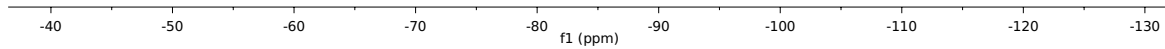

**$^{31}\text{P}$  NMR ( $\text{CDCl}_3$ )**  
**162 MHz**

← -16.58

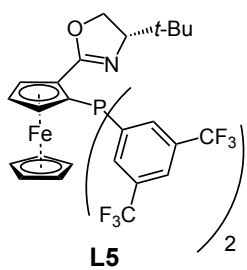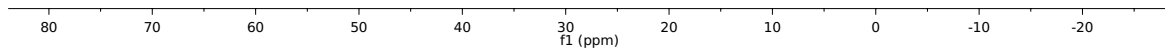

**<sup>1</sup>H NMR (CDCl<sub>3</sub>)  
400 MHz**

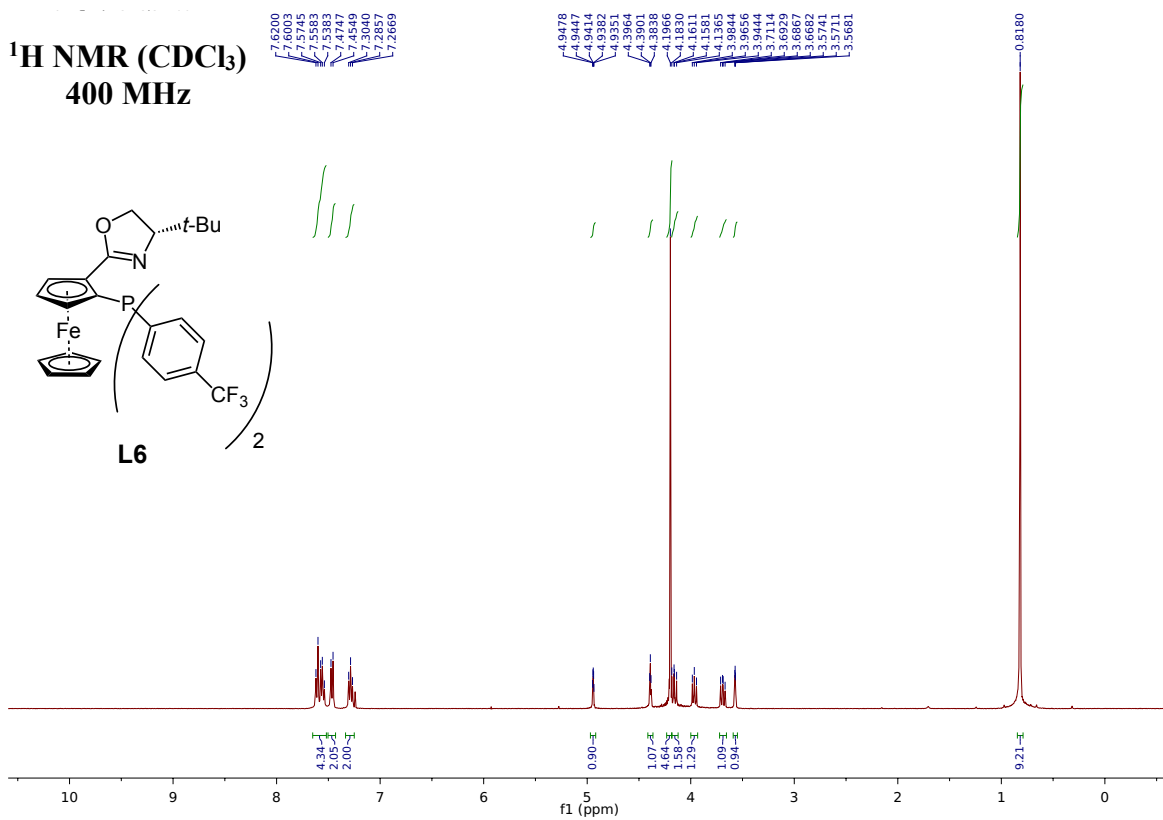

**<sup>13</sup>C NMR (CDCl<sub>3</sub>)  
125 MHz**

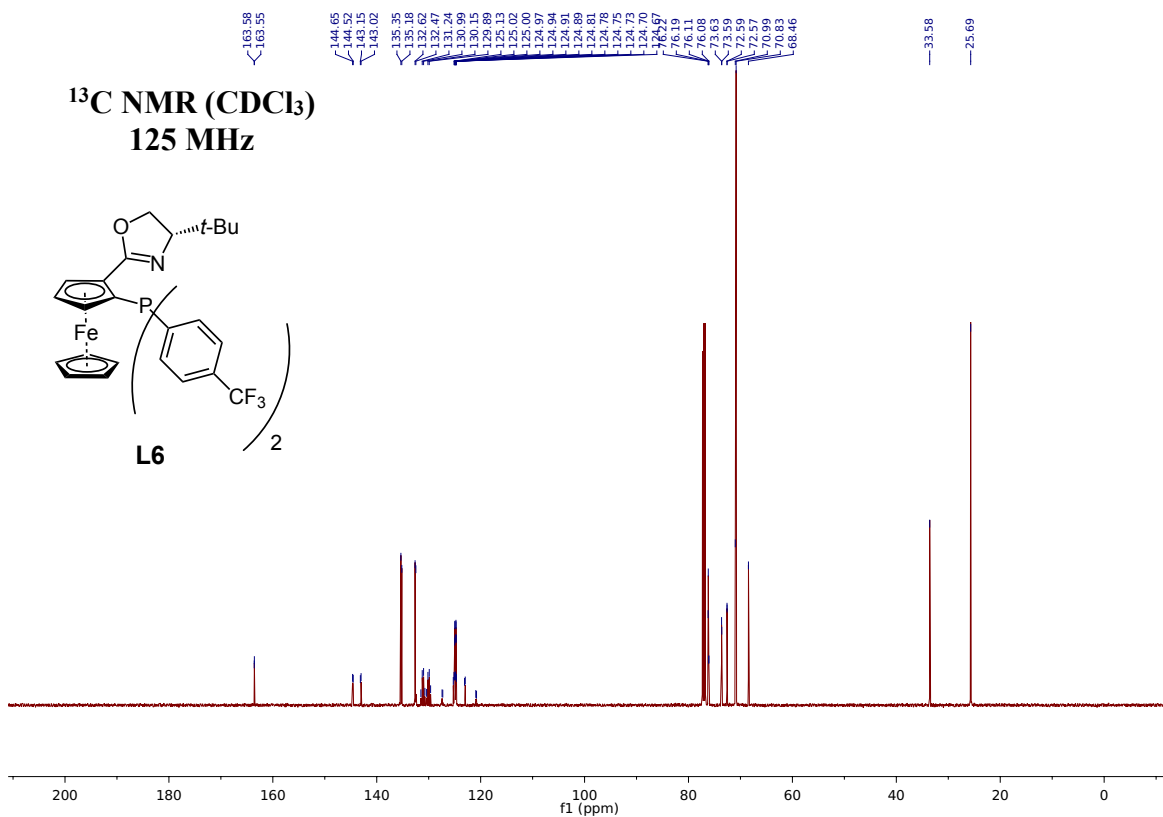



**$^{19}\text{F}$  NMR ( $\text{CDCl}_3$ )**  
**376 MHz**

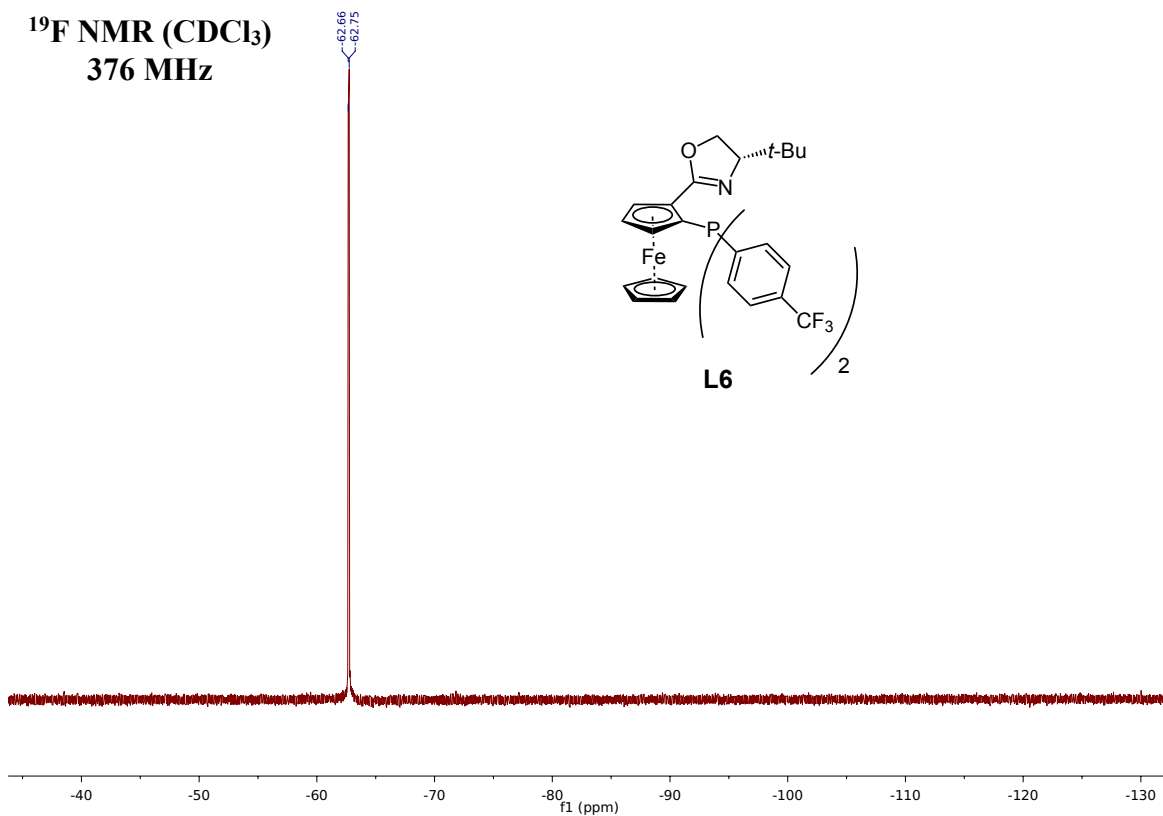

**$^{31}\text{P}$  NMR ( $\text{CDCl}_3$ )**  
**162 MHz**

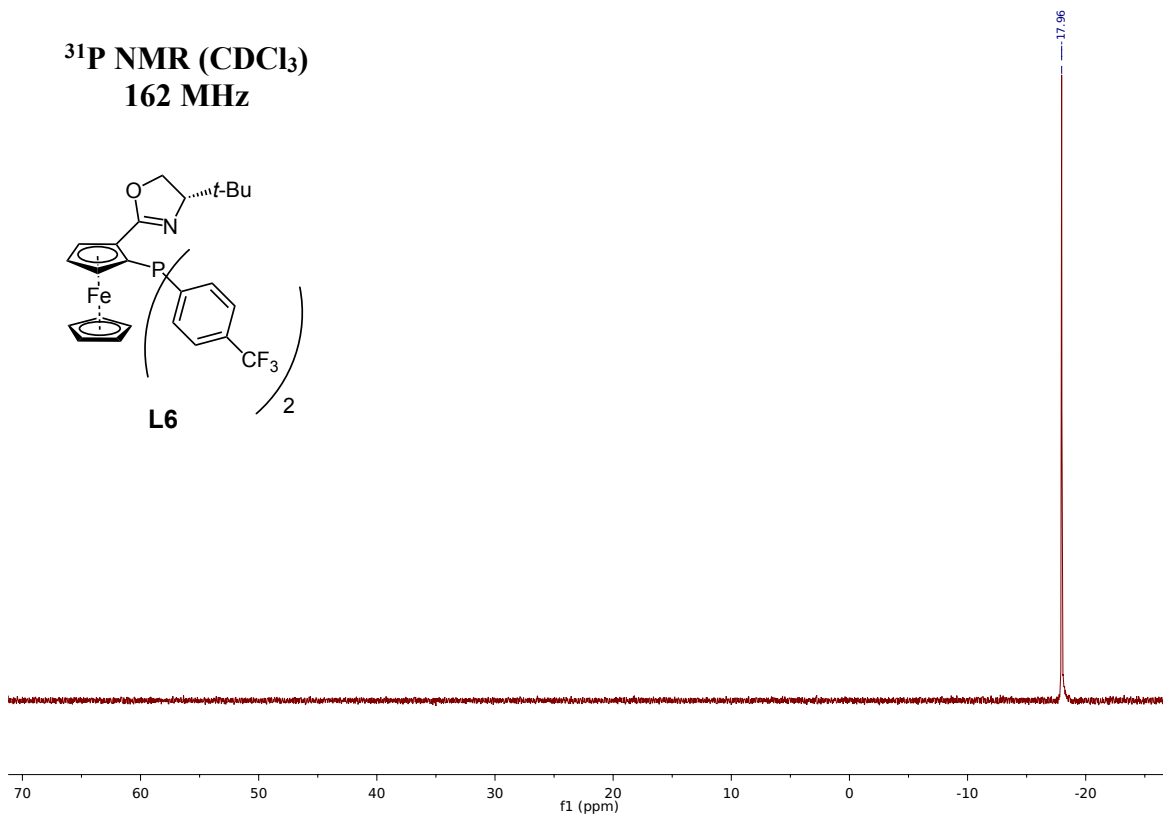

**$^1\text{H}$  NMR ( $\text{CDCl}_3$ )  
400 MHz**

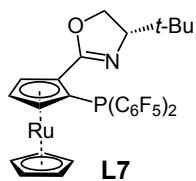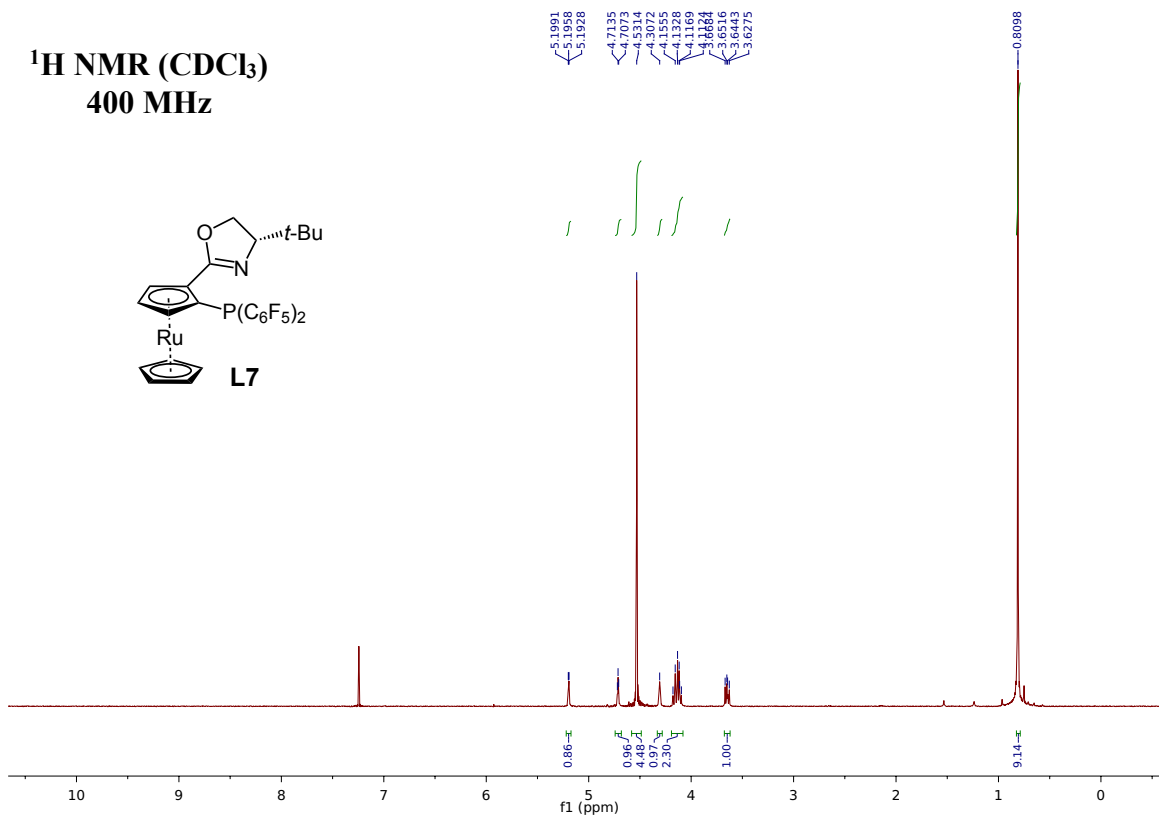

**$^{13}\text{C}$  NMR ( $\text{CDCl}_3$ )  
125 MHz**

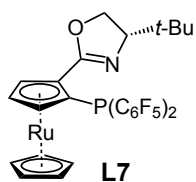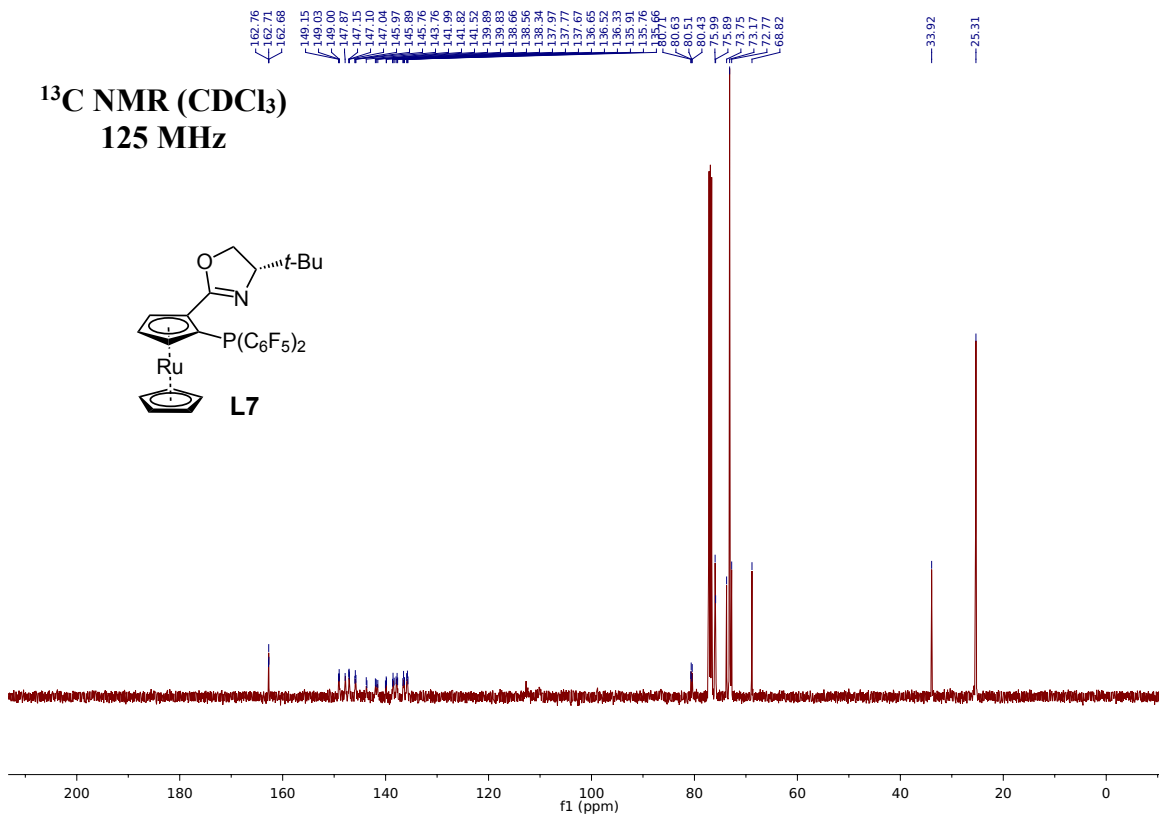

**$^{19}\text{F}$  NMR ( $\text{CDCl}_3$ )**  
**376 MHz**

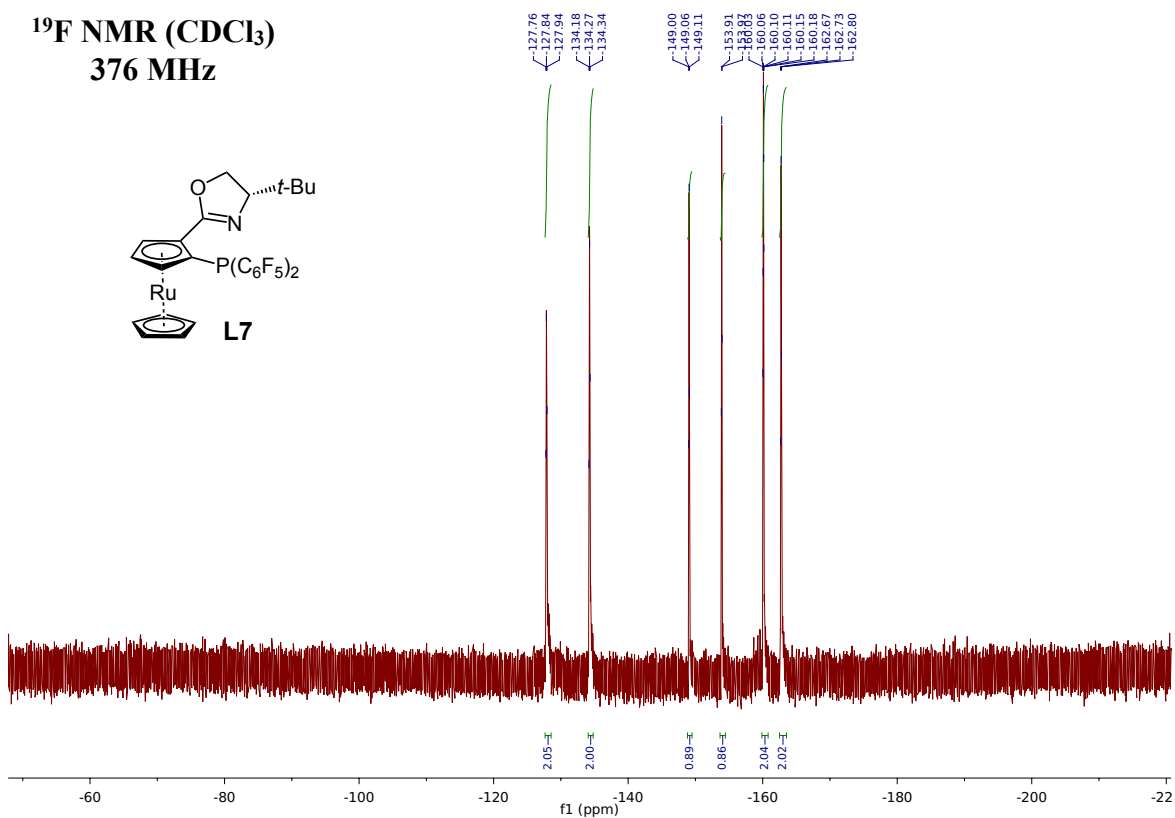

**$^{31}\text{P}$  NMR ( $\text{CDCl}_3$ )**  
**162 MHz**

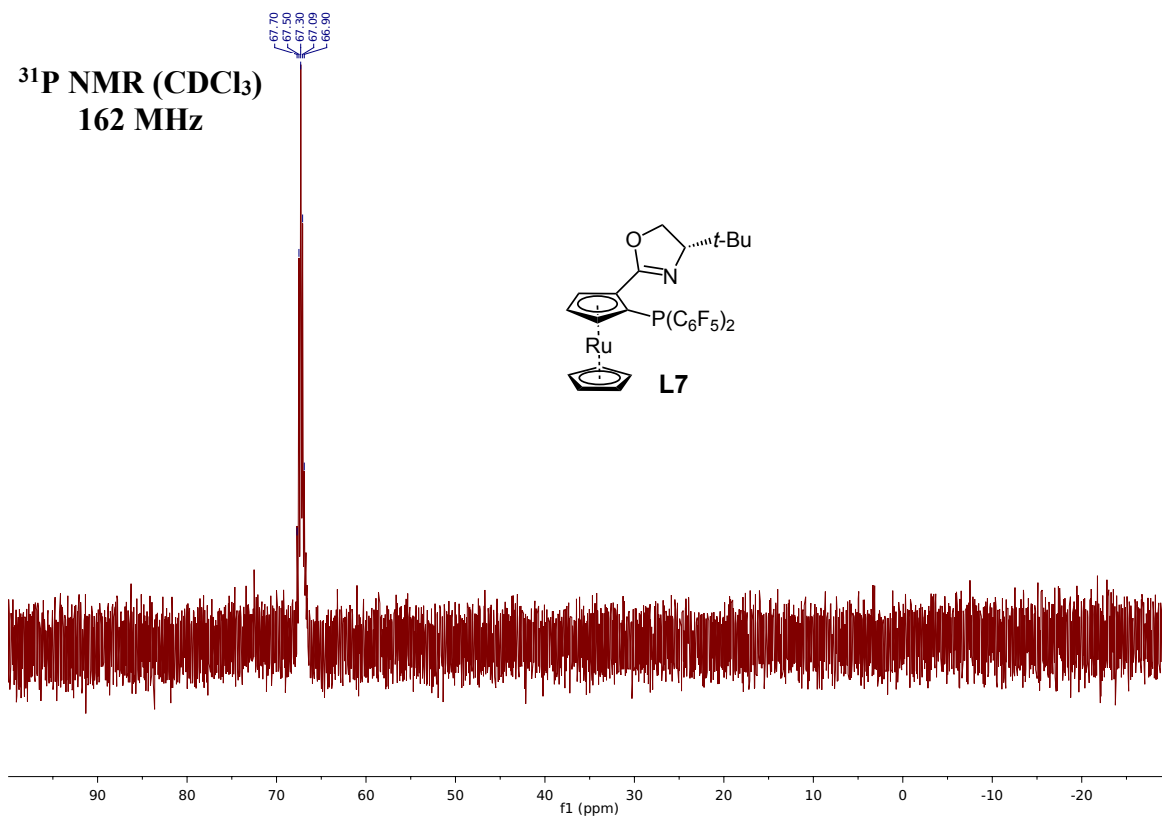

**<sup>1</sup>H NMR (DMSO-*d*<sub>6</sub>)  
400 MHz**

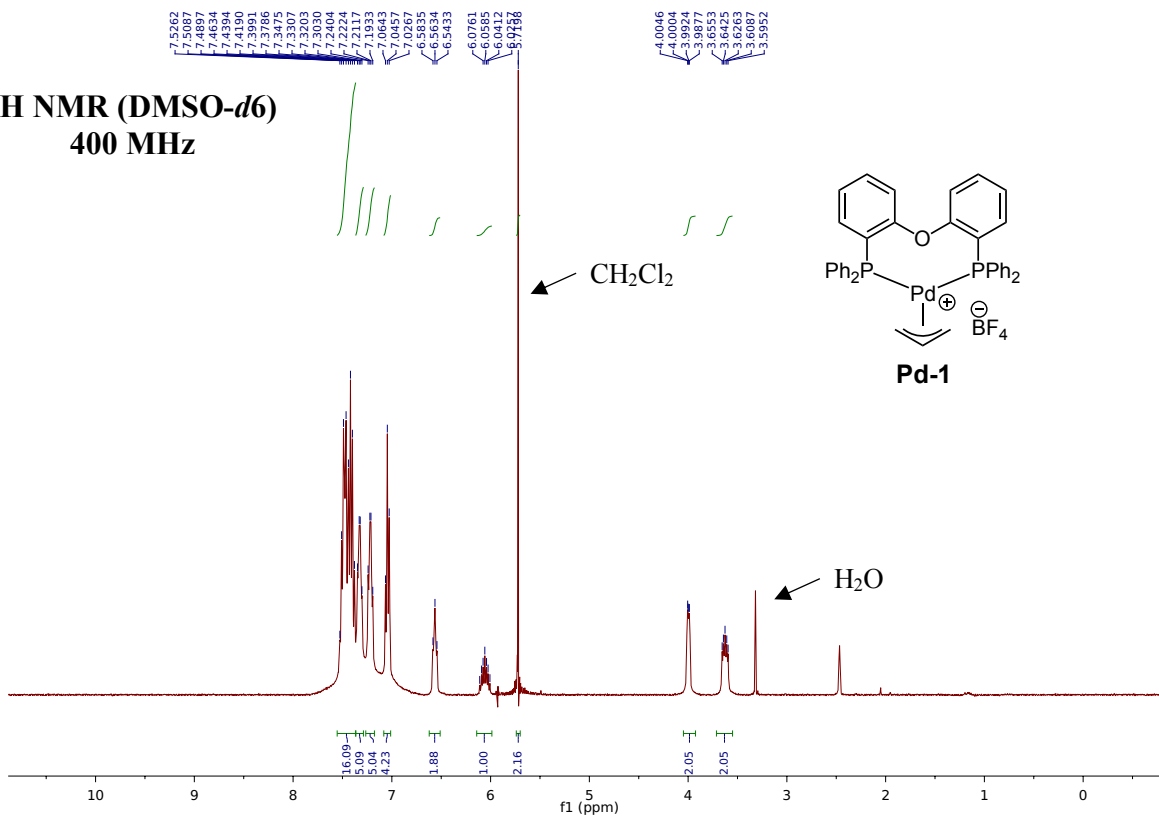

**<sup>13</sup>C NMR (DMSO-*d*<sub>6</sub>)  
125 MHz**

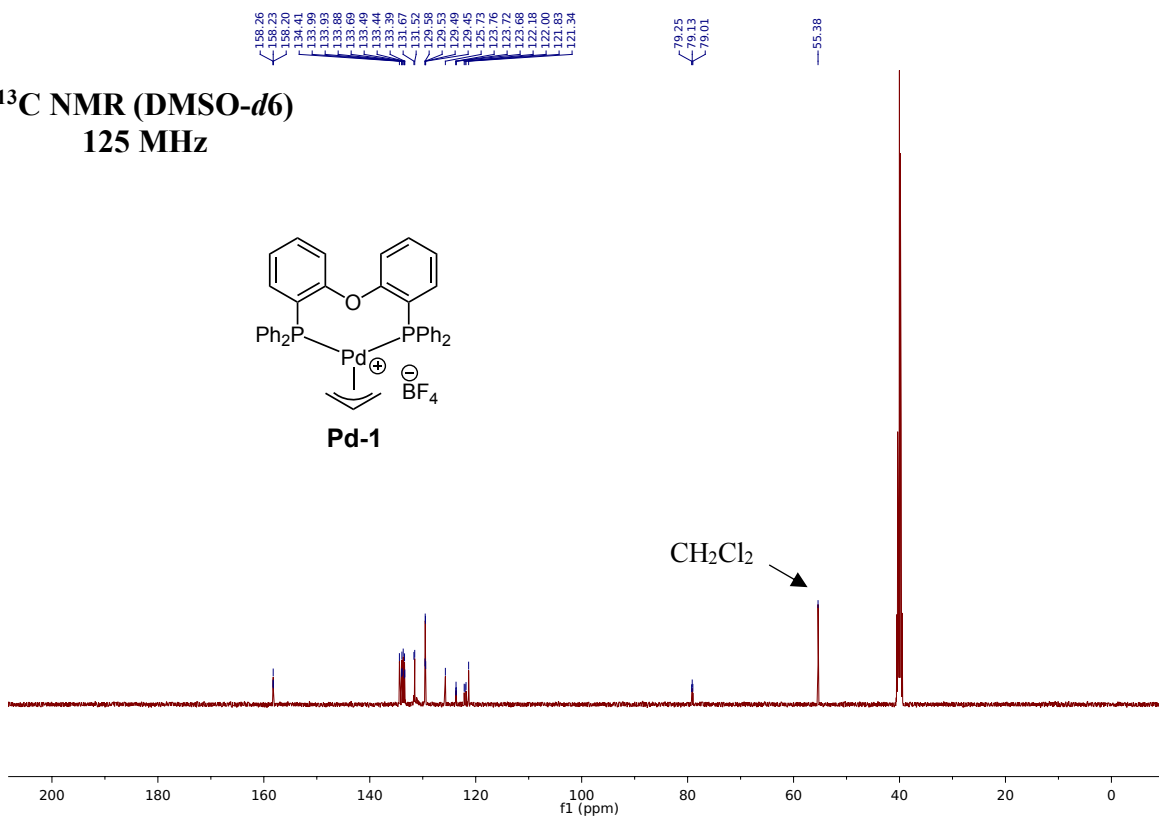

**$^{19}\text{F}$  NMR (DMSO-*d*<sub>6</sub>)**  
**376 MHz**

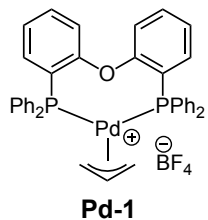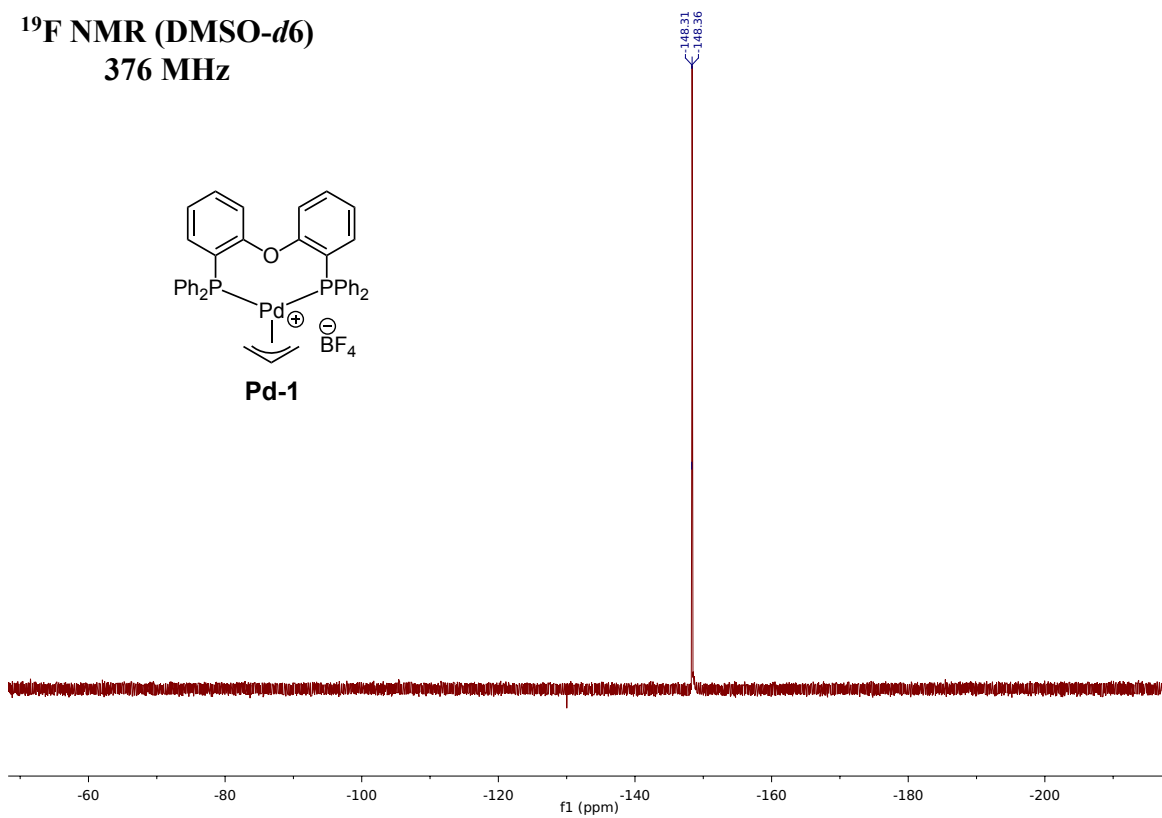

**$^{31}\text{P}$  NMR (DMSO-*d*<sub>6</sub>)**  
**162 MHz**

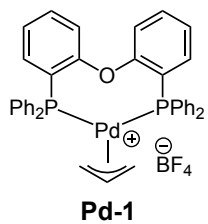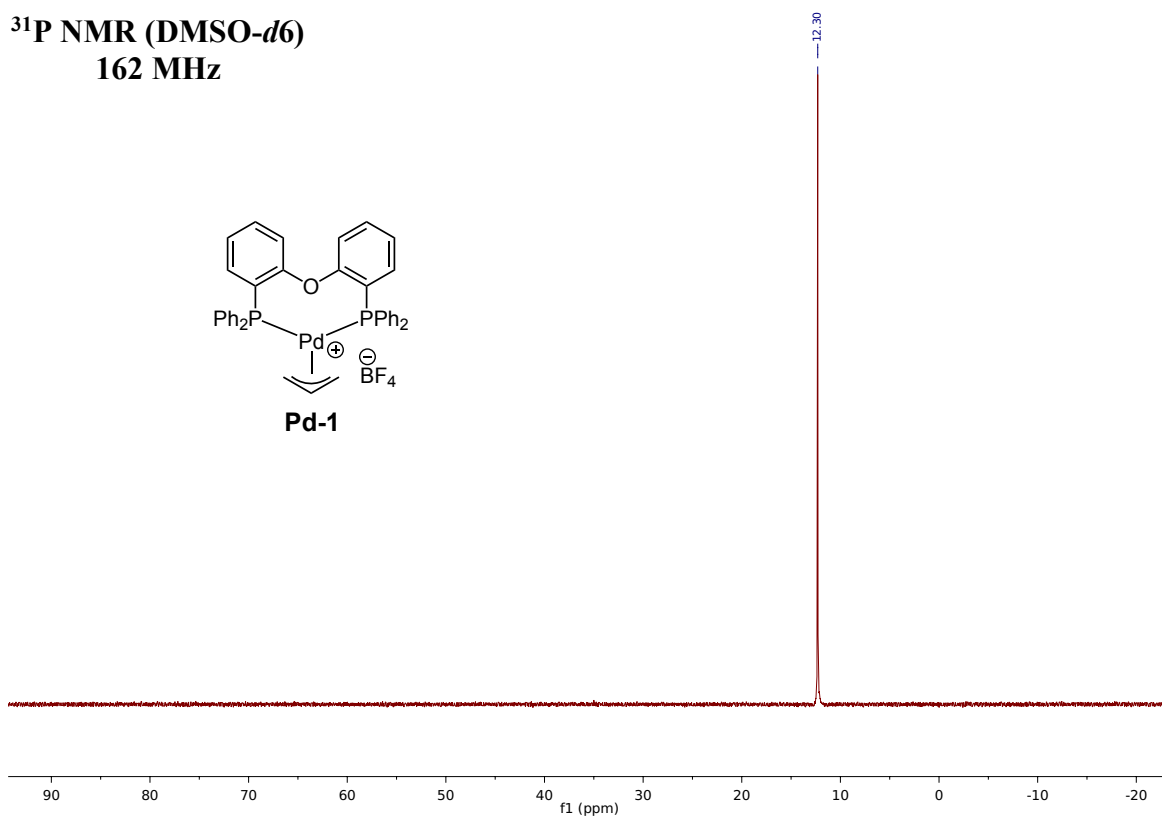

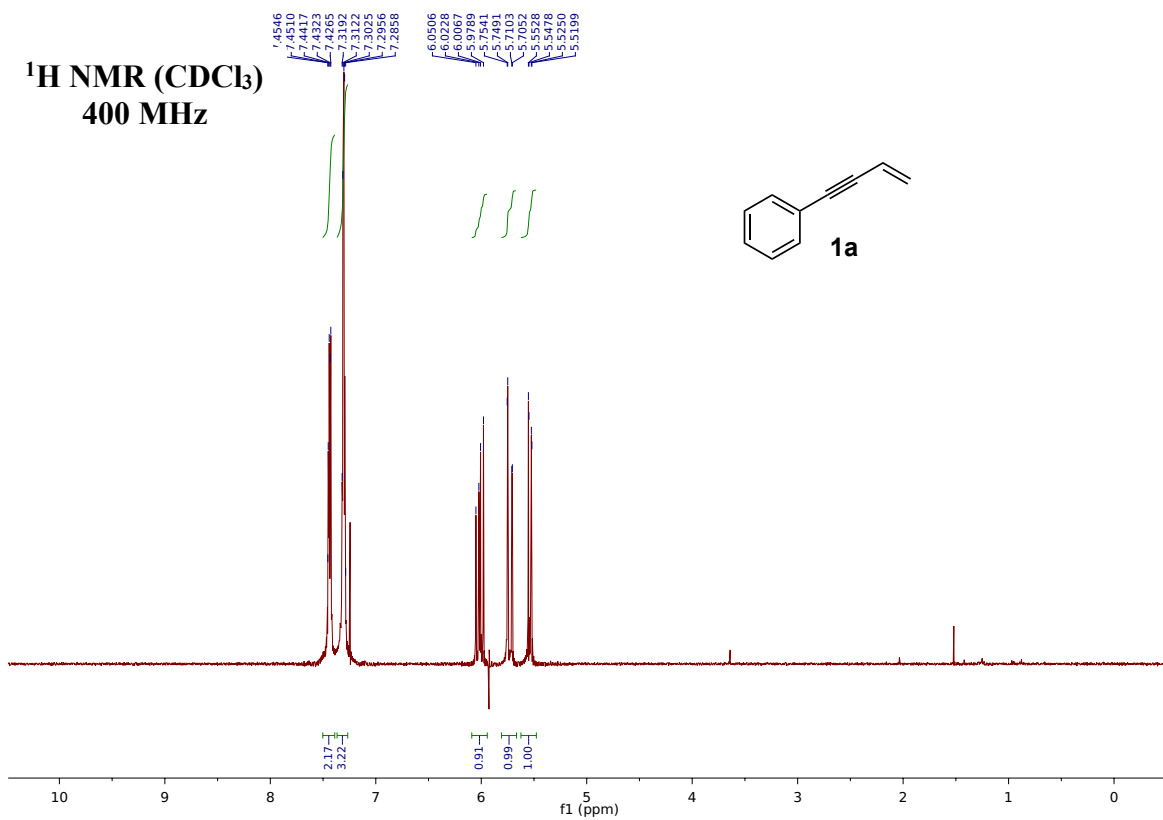

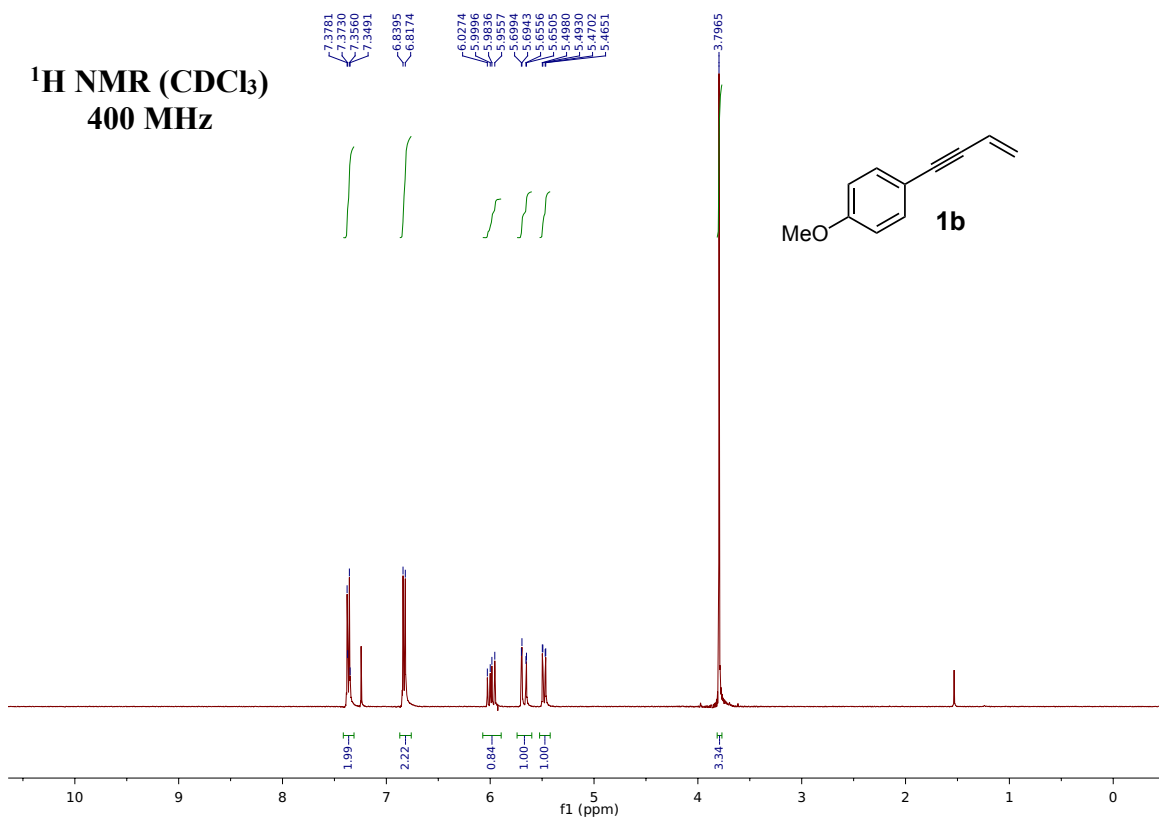

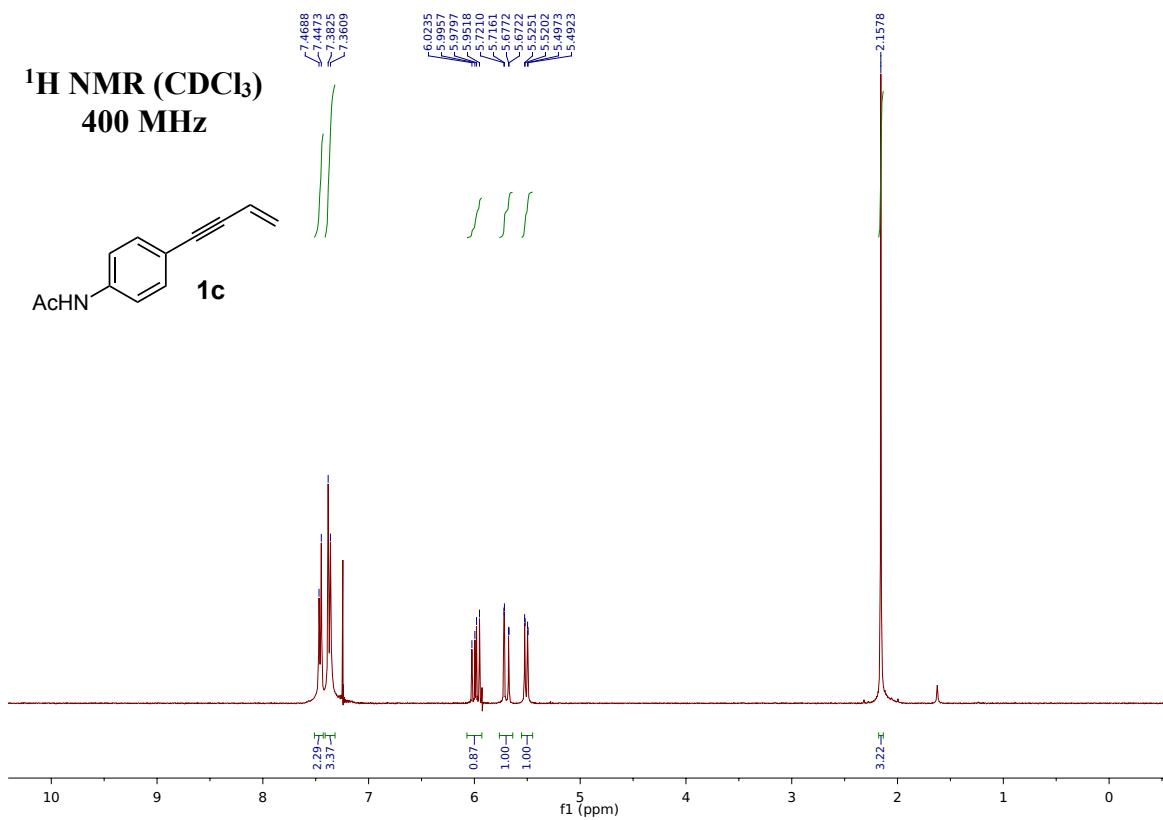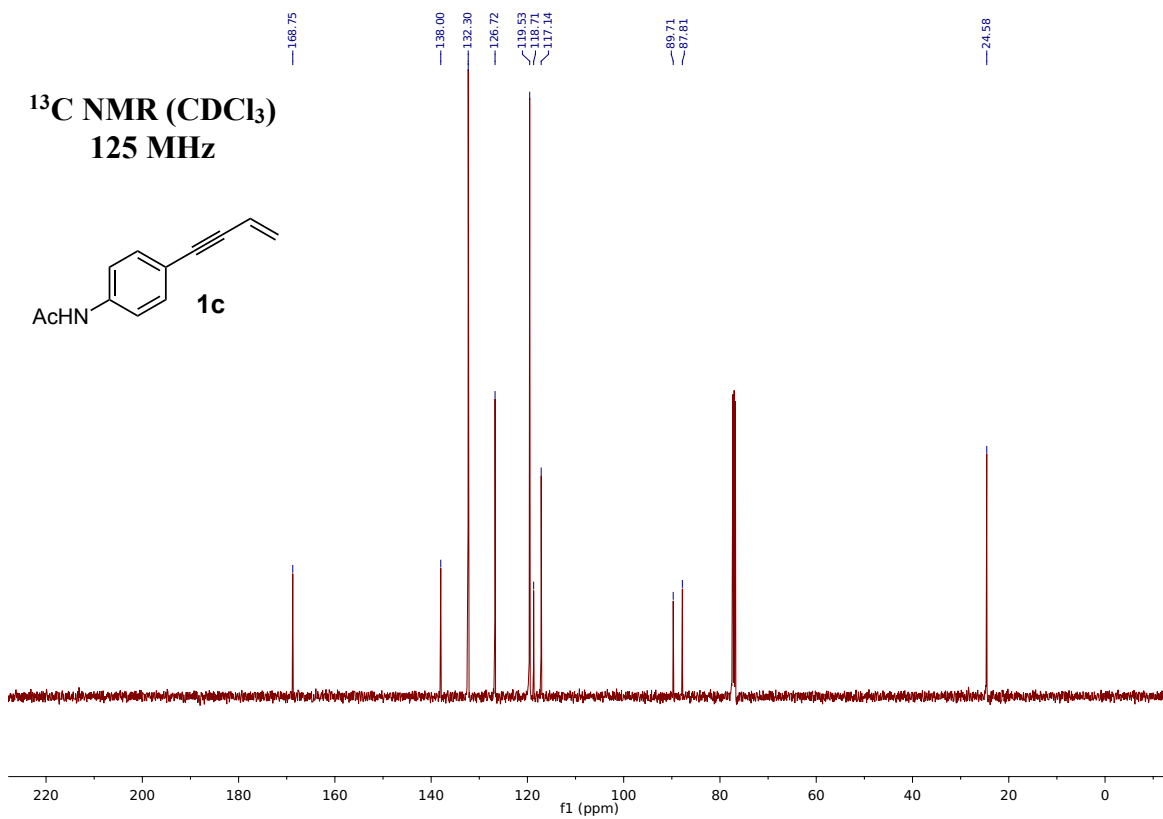



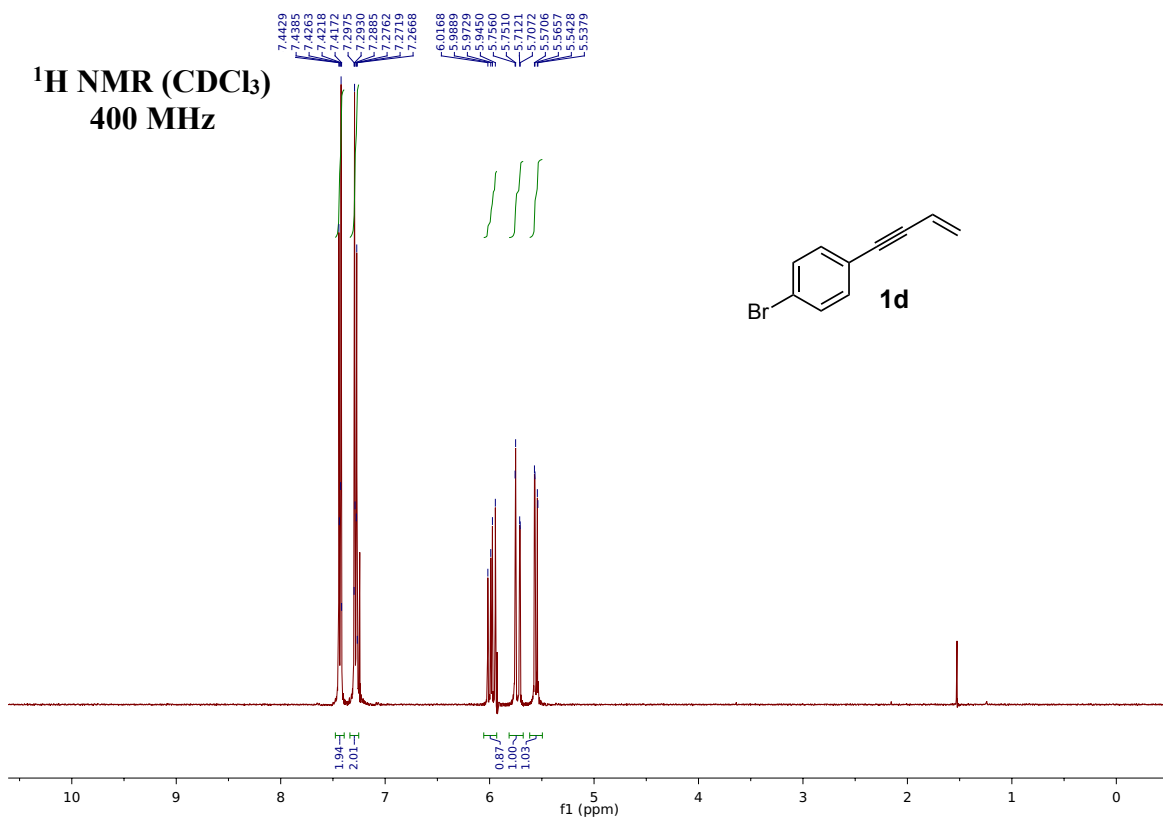

**<sup>1</sup>H NMR (CDCl<sub>3</sub>)  
400 MHz**

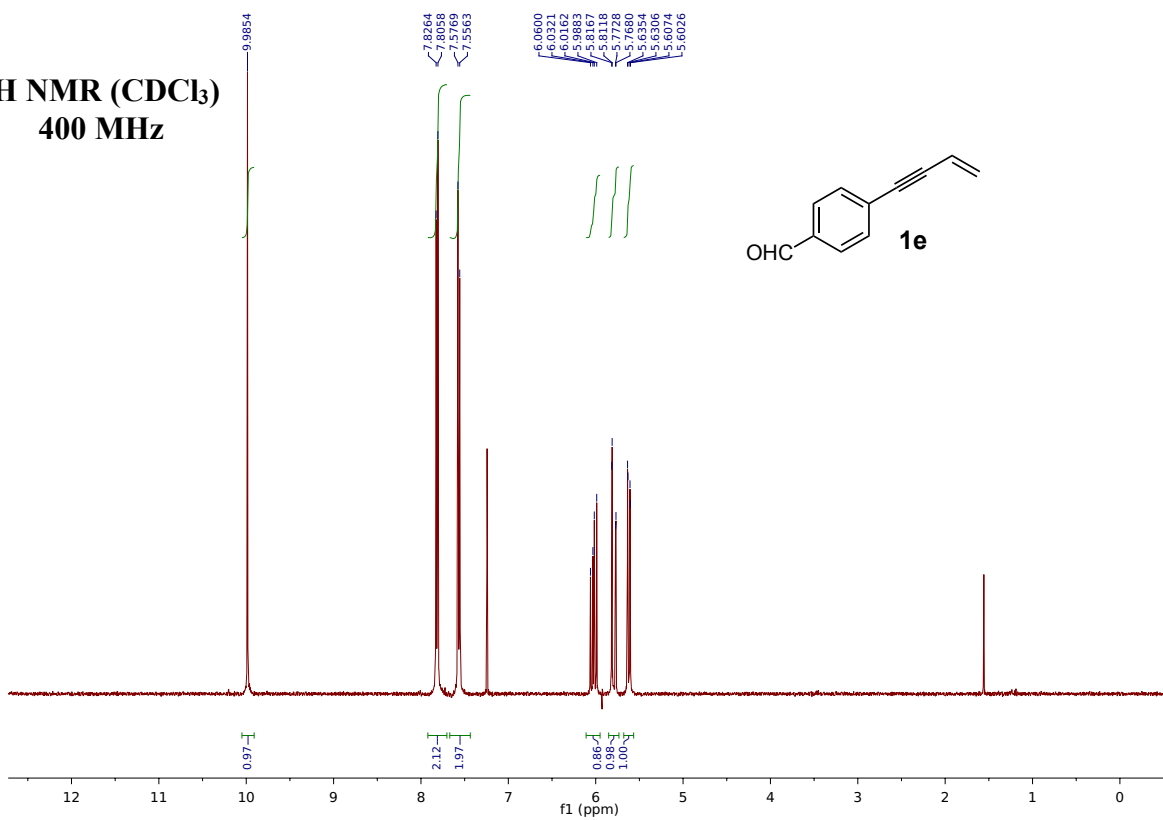

**<sup>13</sup>C NMR (CDCl<sub>3</sub>)  
125 MHz**

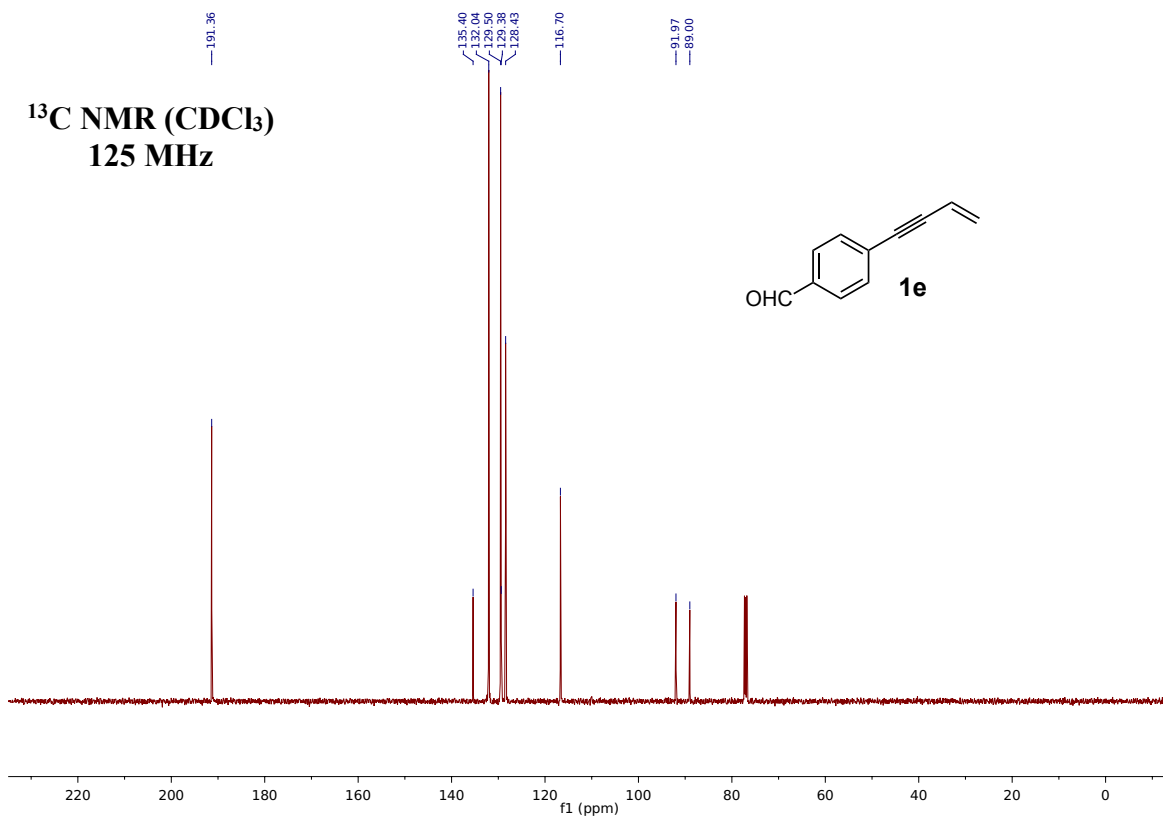

**$^1\text{H}$  NMR ( $\text{CDCl}_3$ )  
400 MHz**

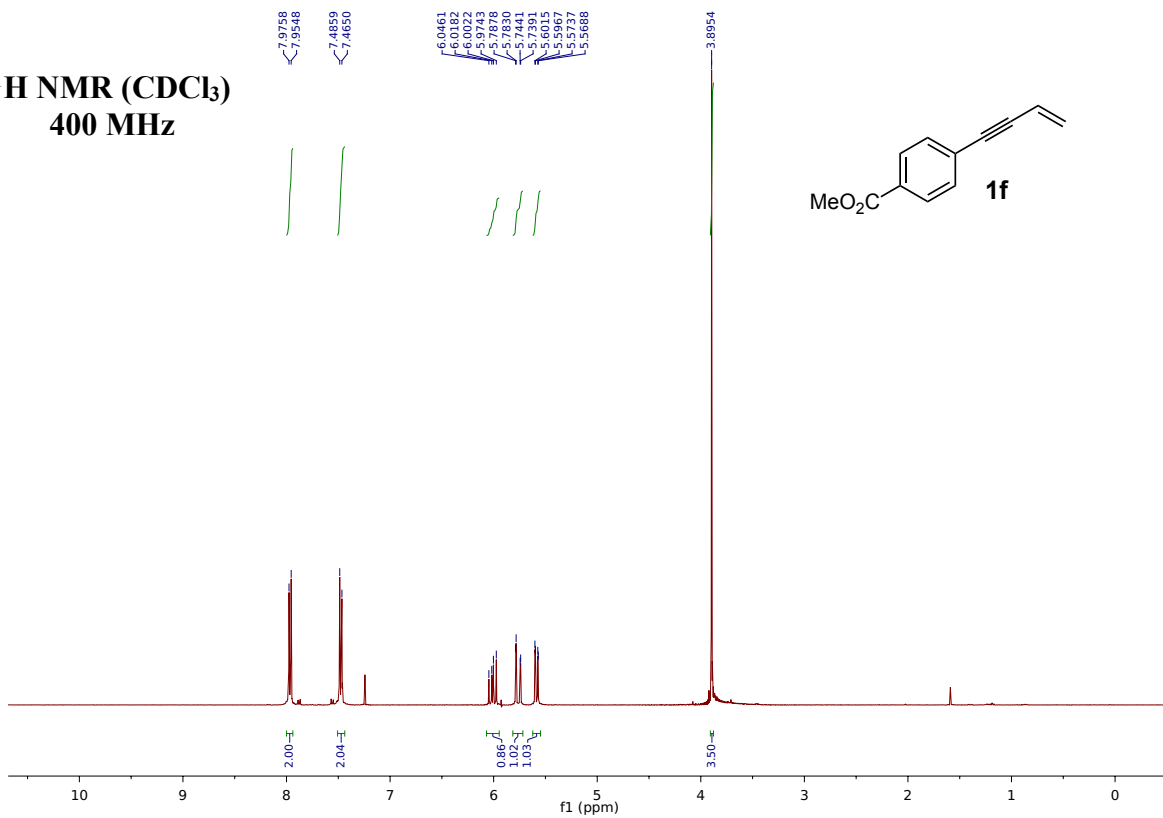

**$^{13}\text{C}$  NMR ( $\text{CDCl}_3$ )  
125 MHz**

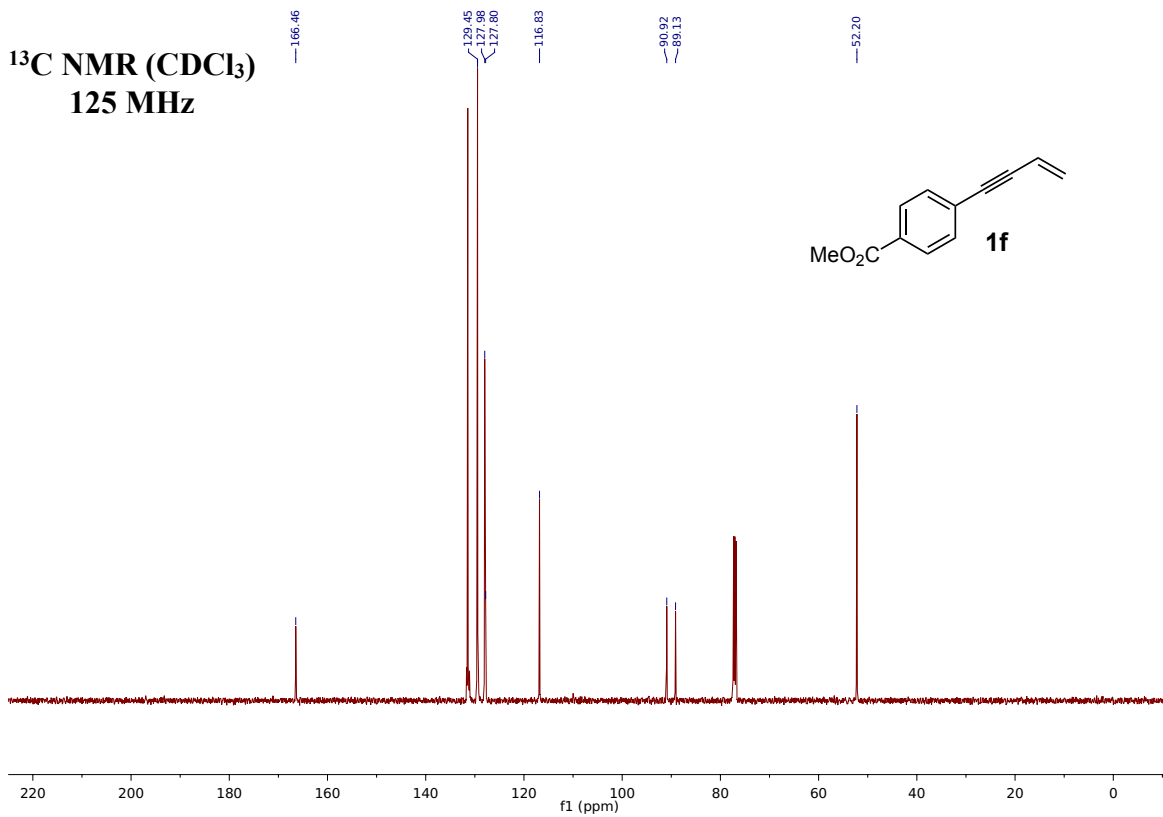

**$^1\text{H}$  NMR ( $\text{CDCl}_3$ )  
400 MHz**

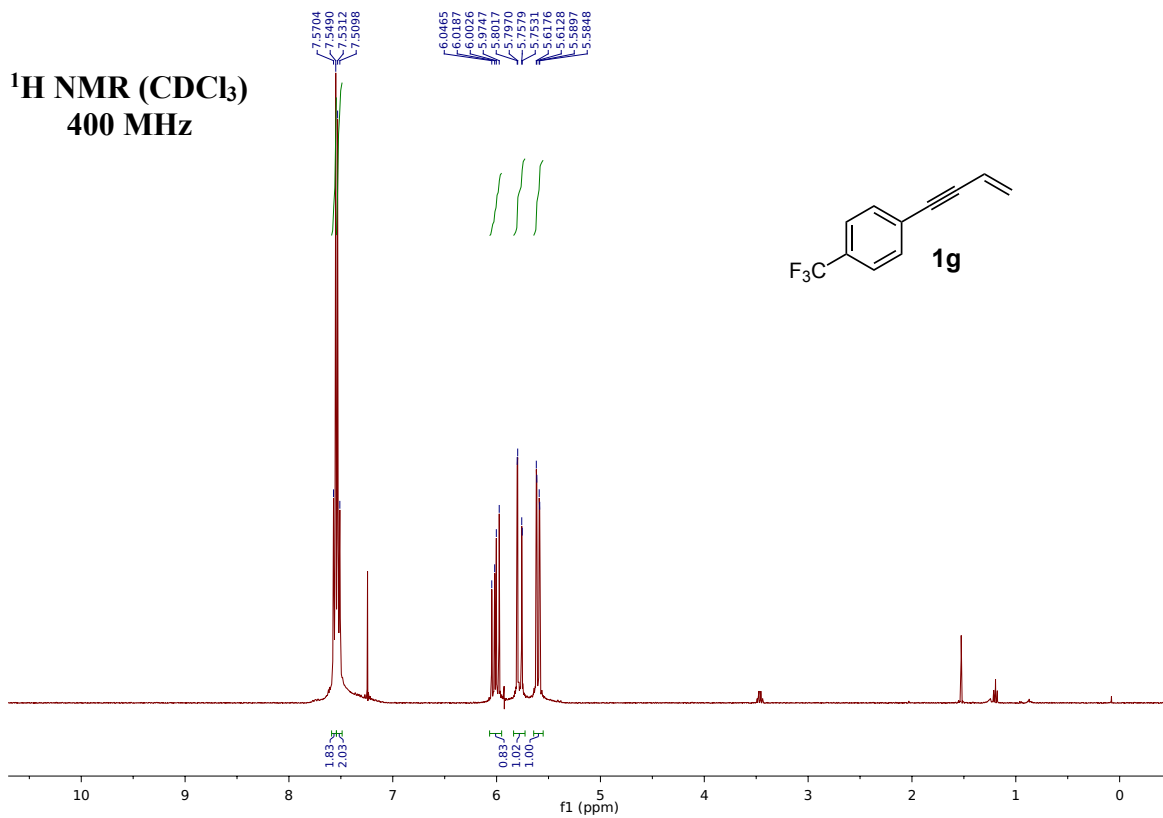

**$^{19}\text{F}$  NMR ( $\text{CDCl}_3$ )  
376 MHz**

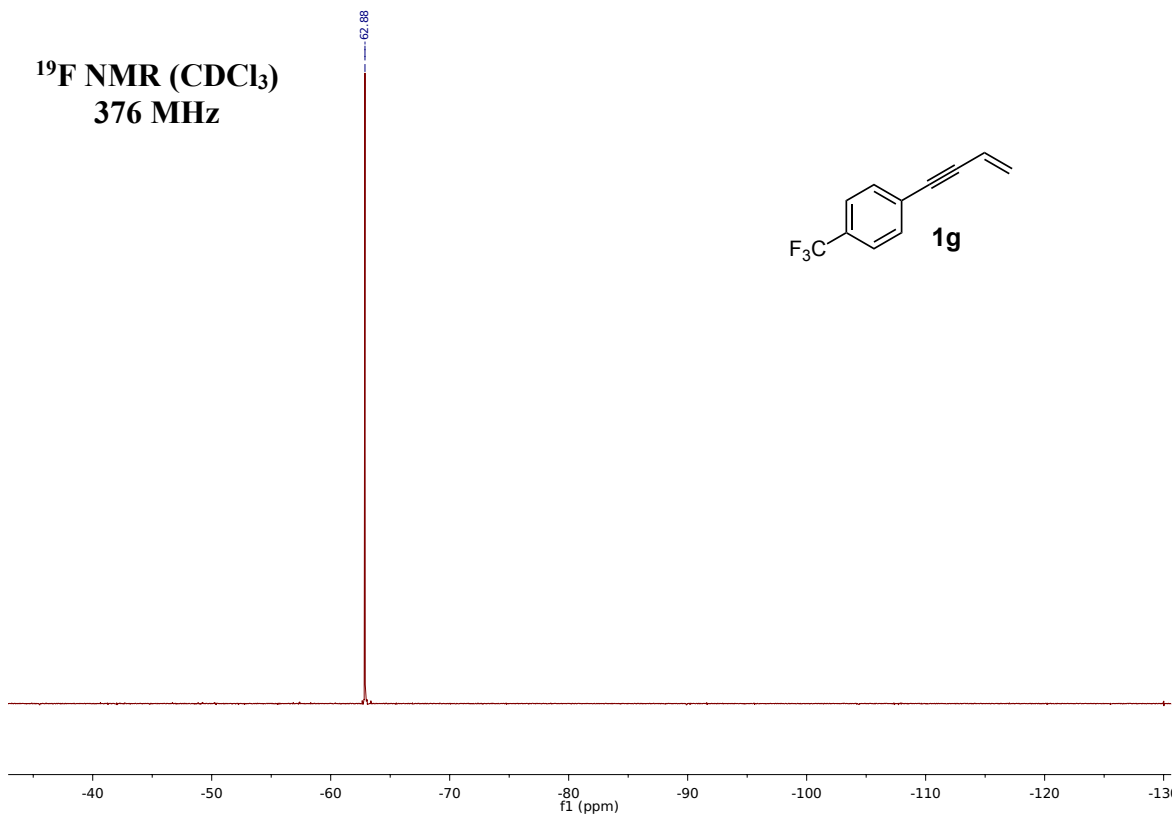

<sup>1</sup>H NMR (CDCl<sub>3</sub>)  
400 MHz

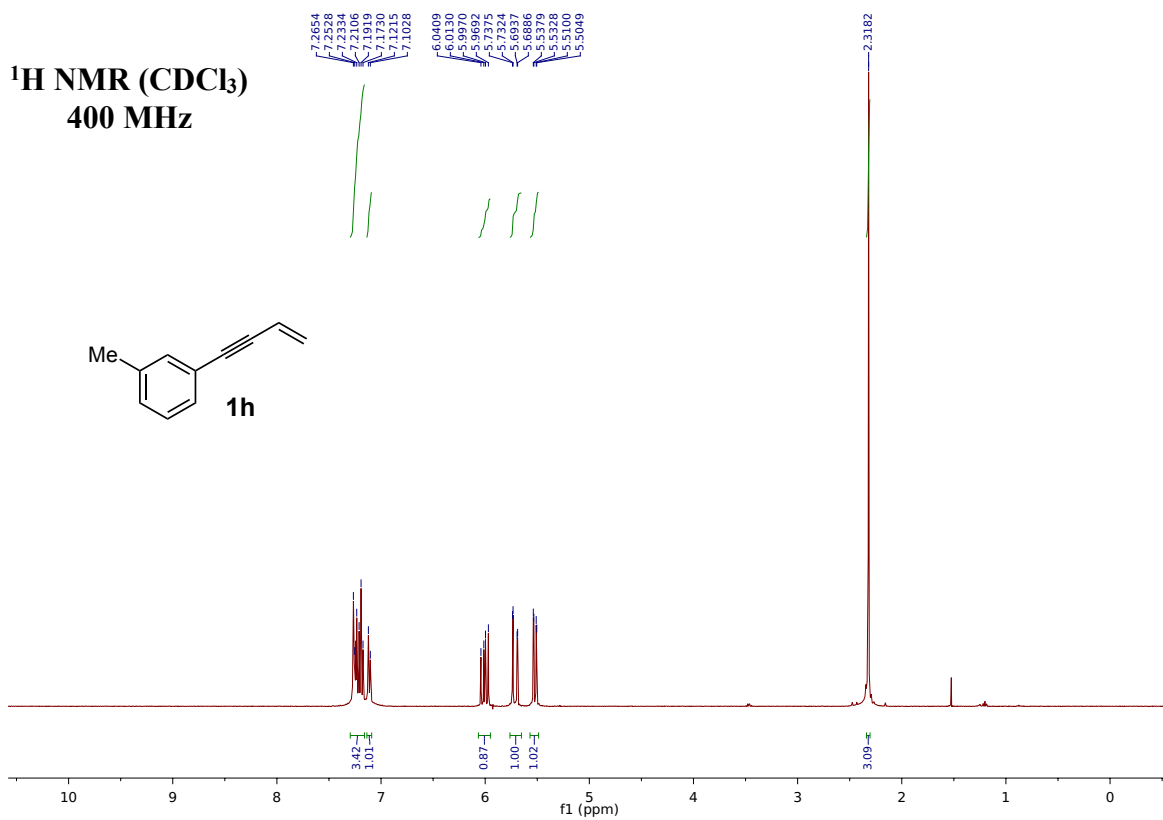

<sup>13</sup>C NMR (CDCl<sub>3</sub>)  
125 MHz

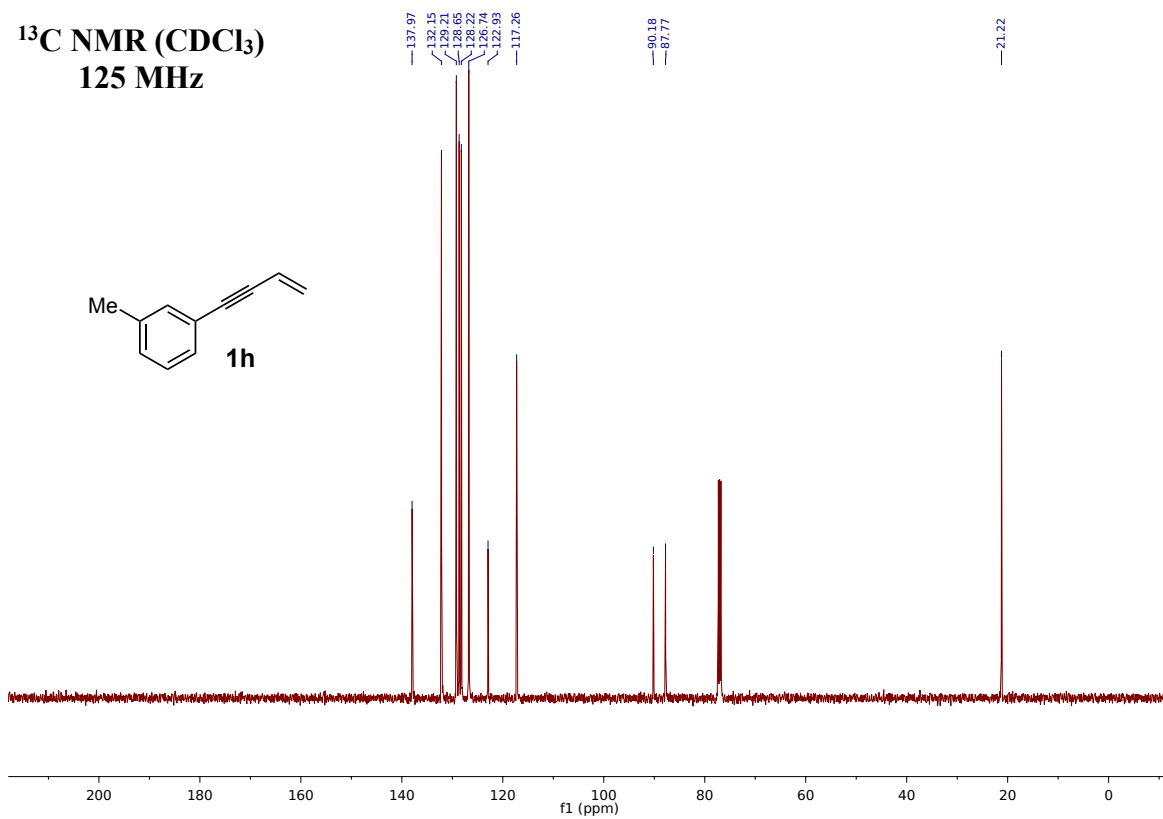

<sup>1</sup>H NMR (CDCl<sub>3</sub>)  
400 MHz

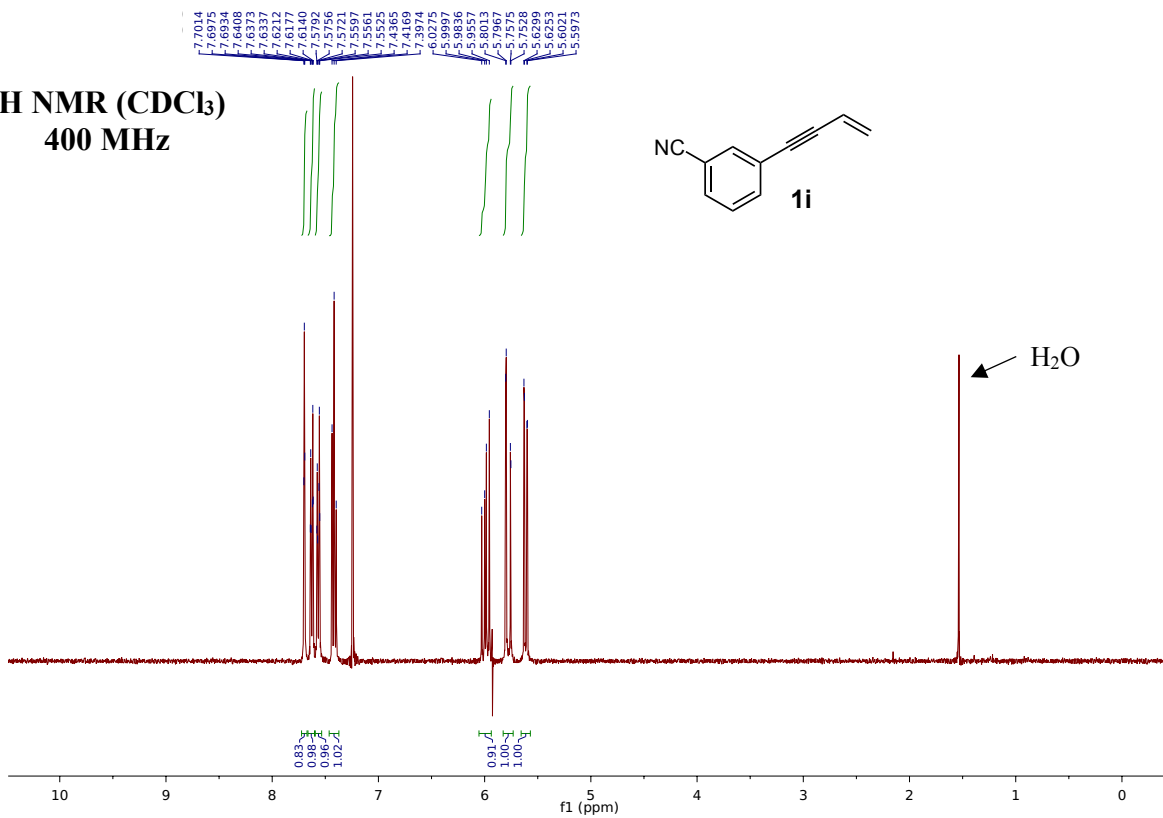

<sup>13</sup>C NMR (CDCl<sub>3</sub>)  
125 MHz

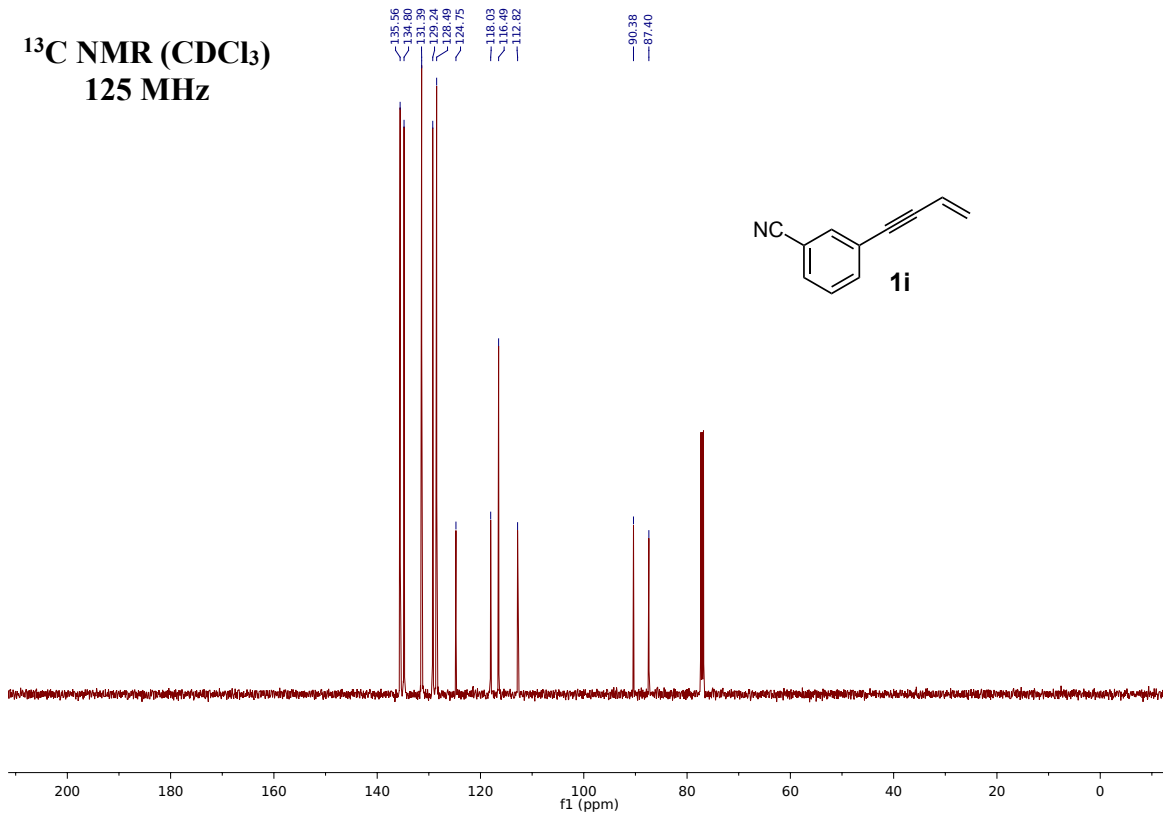

**<sup>1</sup>H NMR (CDCl<sub>3</sub>)  
400 MHz**

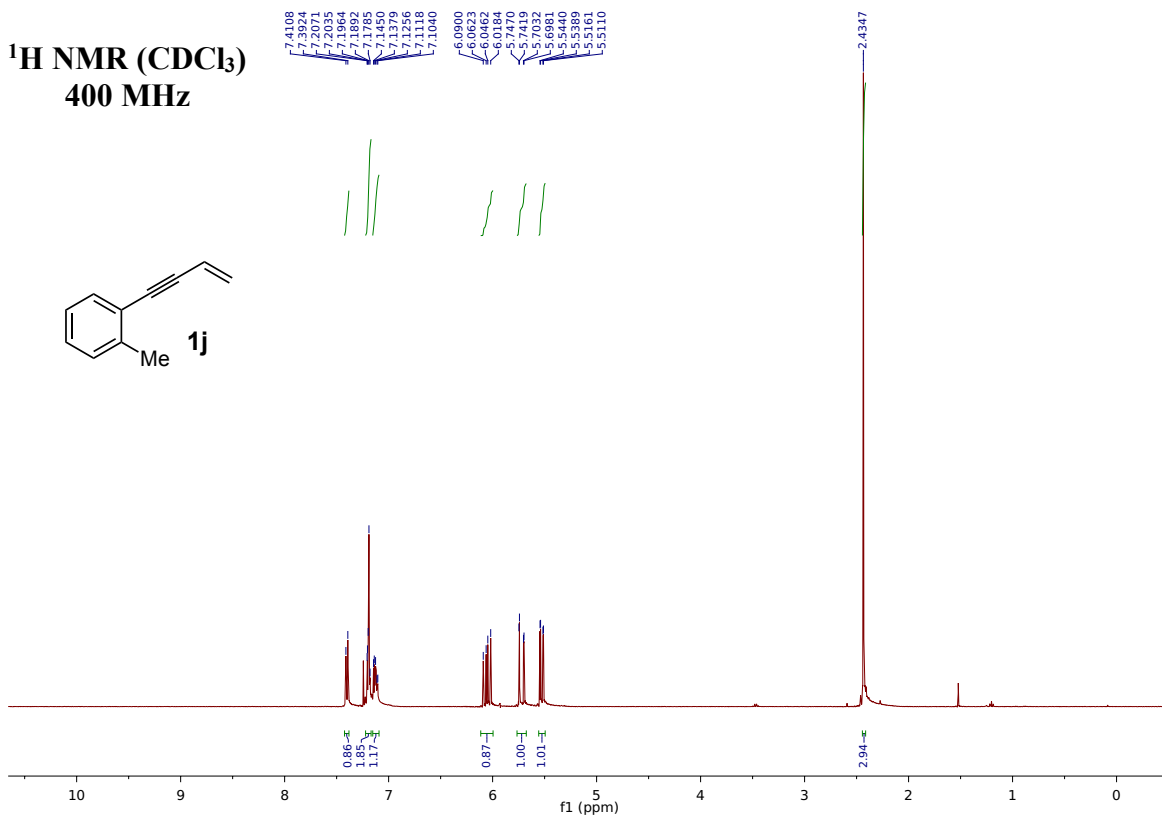

**<sup>13</sup>C NMR (CDCl<sub>3</sub>)  
125 MHz**

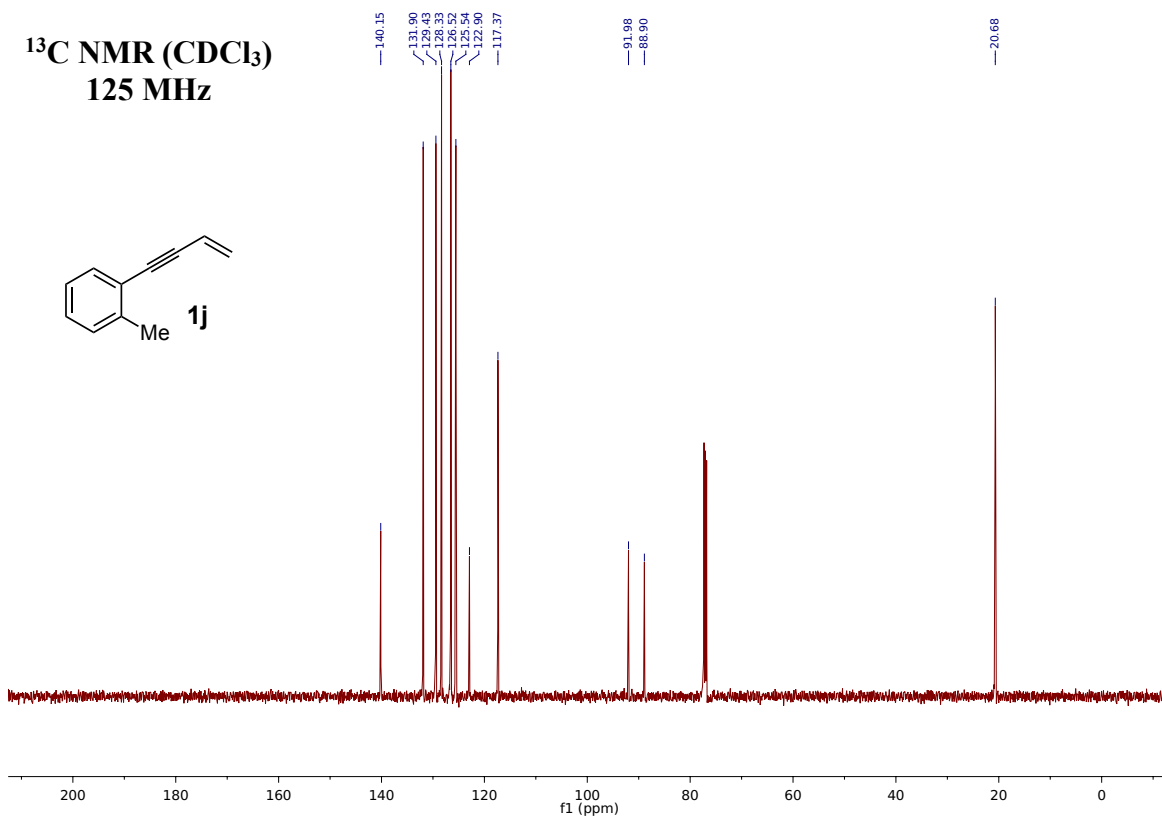

**<sup>1</sup>H NMR (CDCl<sub>3</sub>)  
400 MHz**

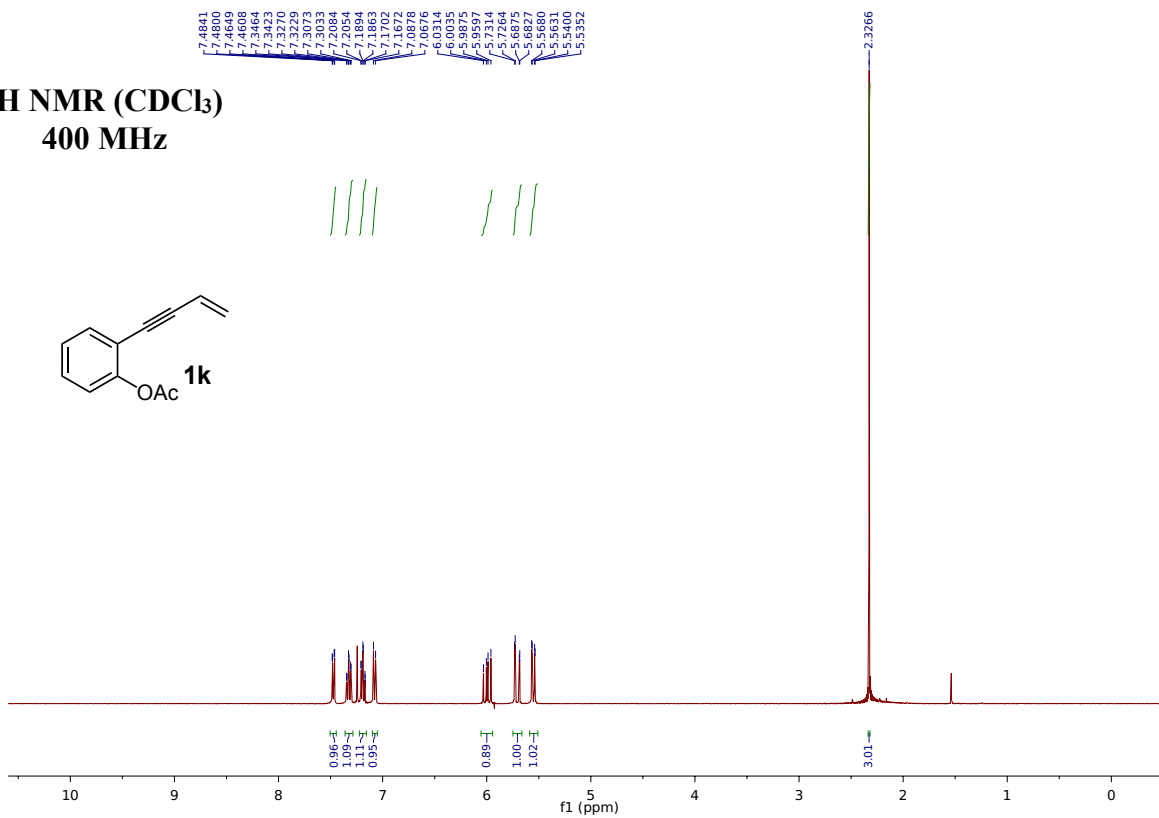

**<sup>13</sup>C NMR (CDCl<sub>3</sub>)  
125 MHz**

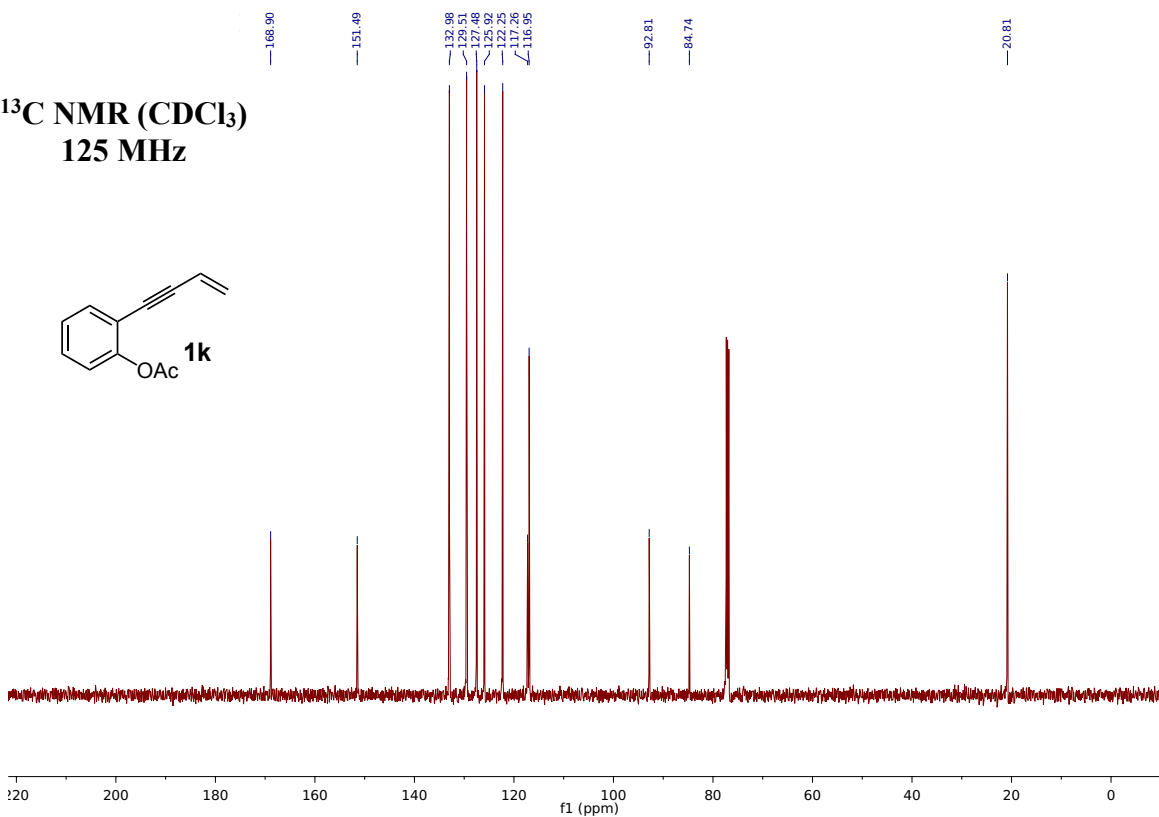



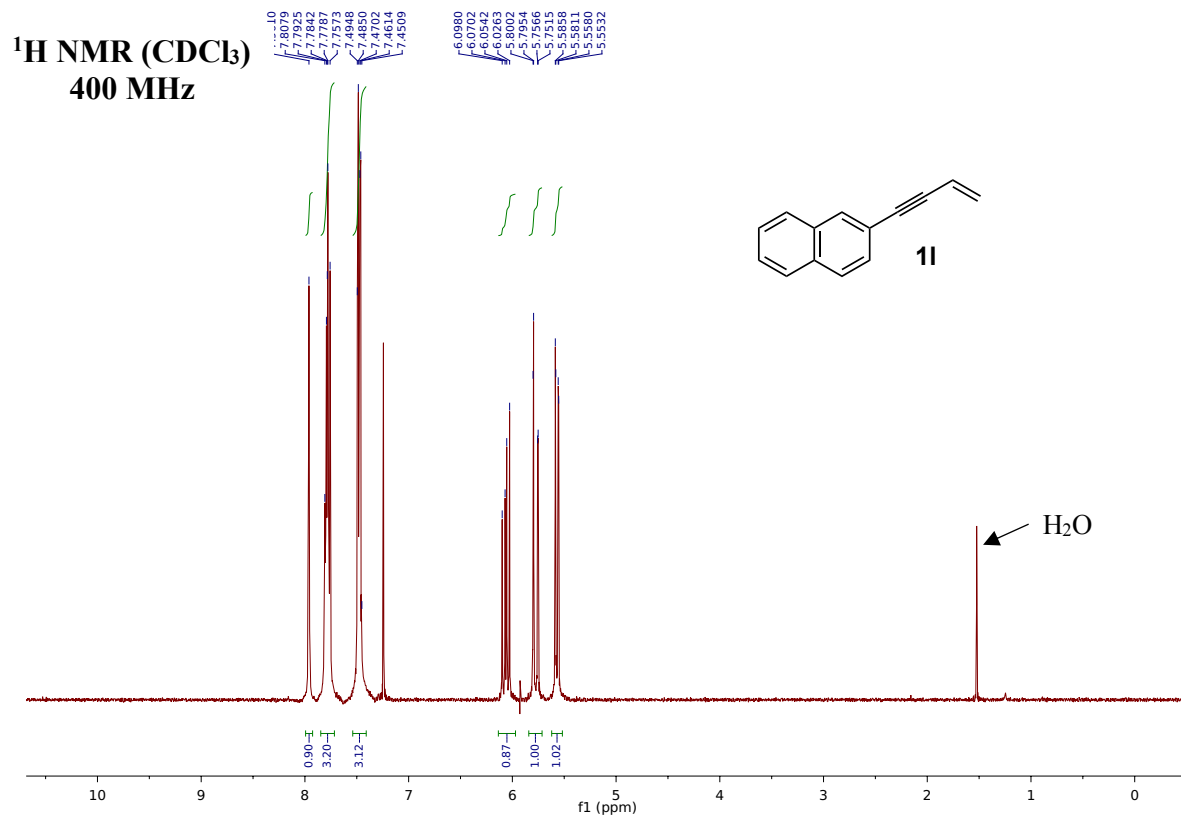

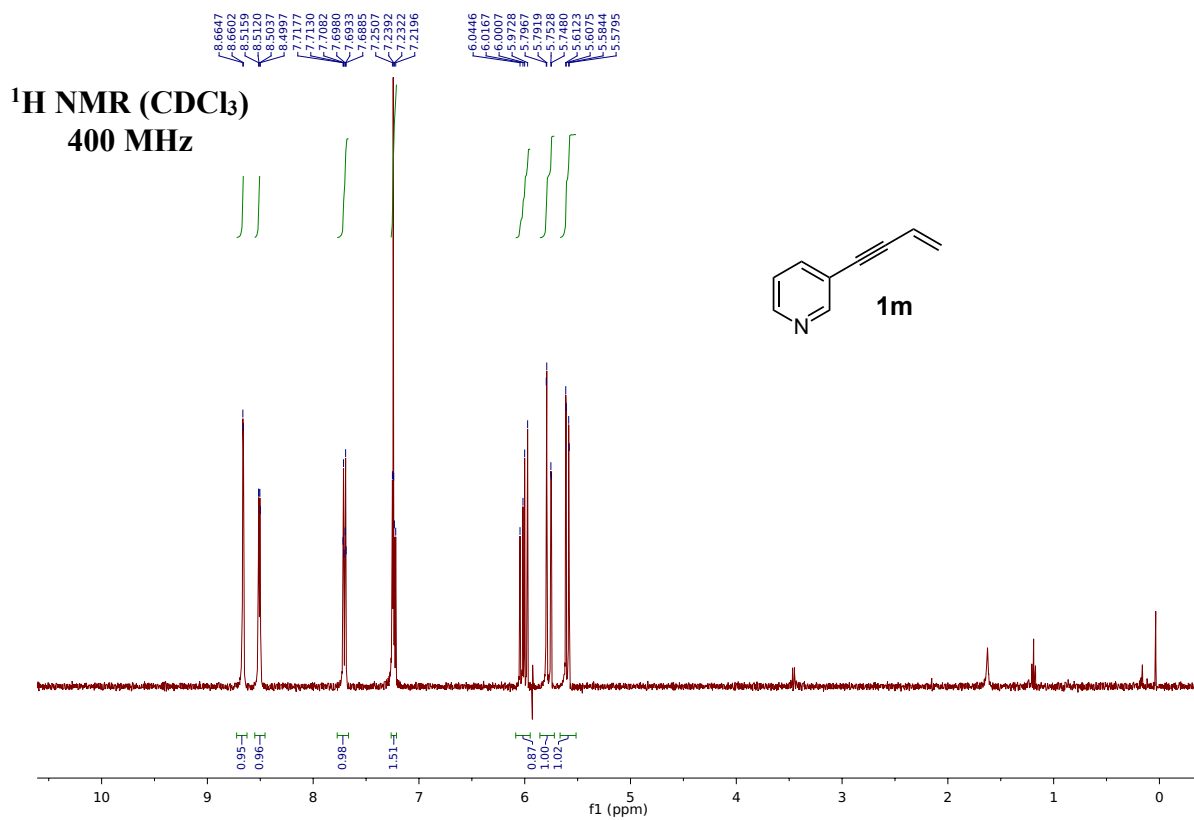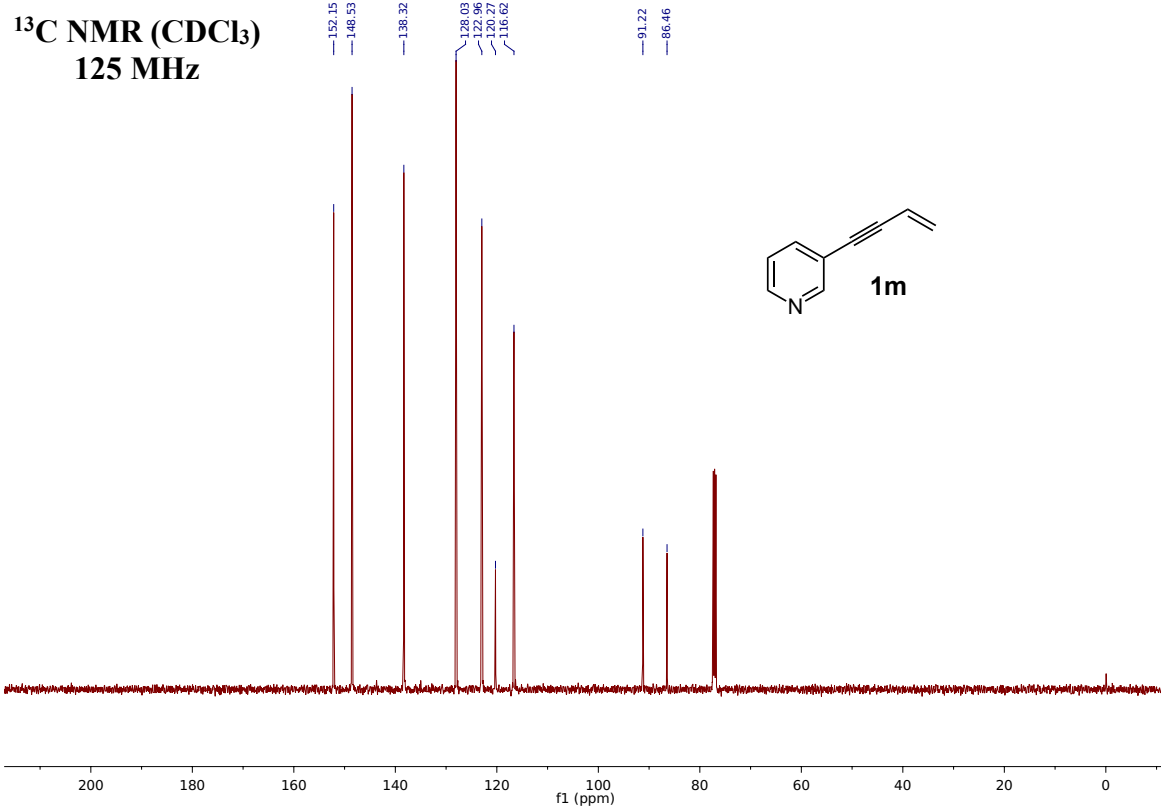

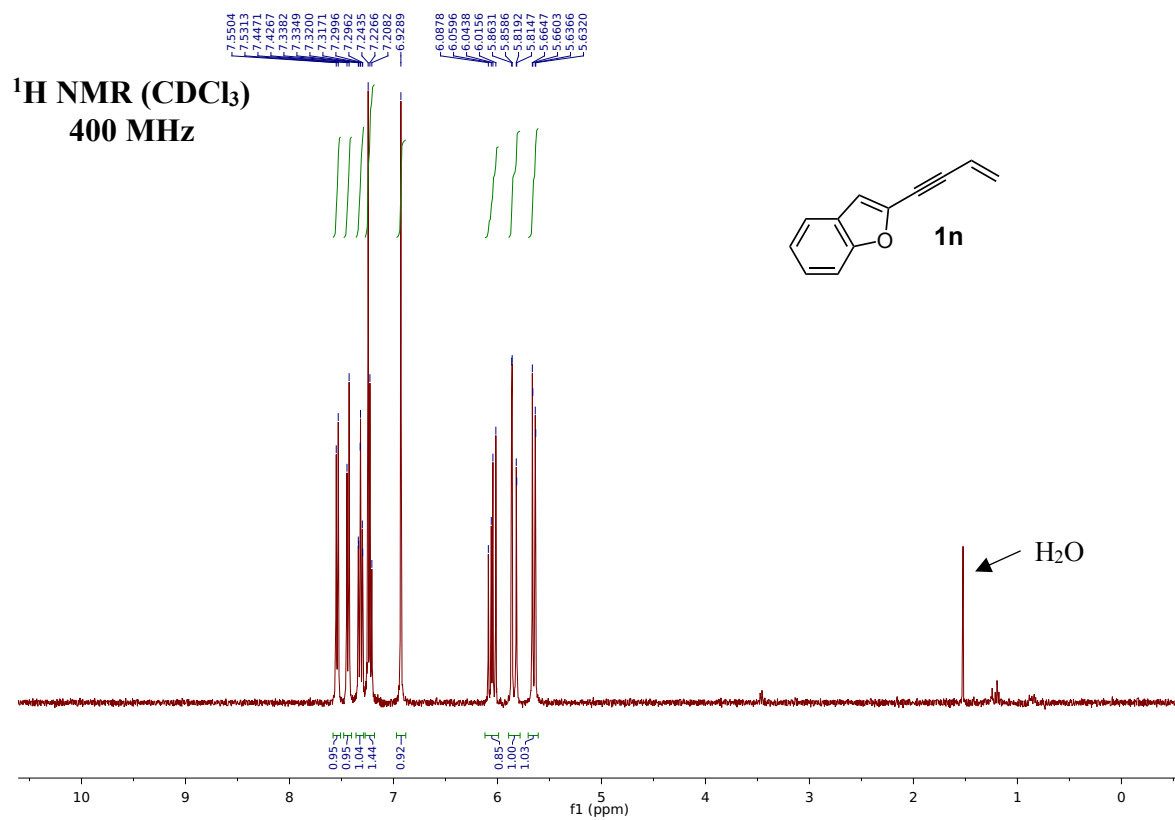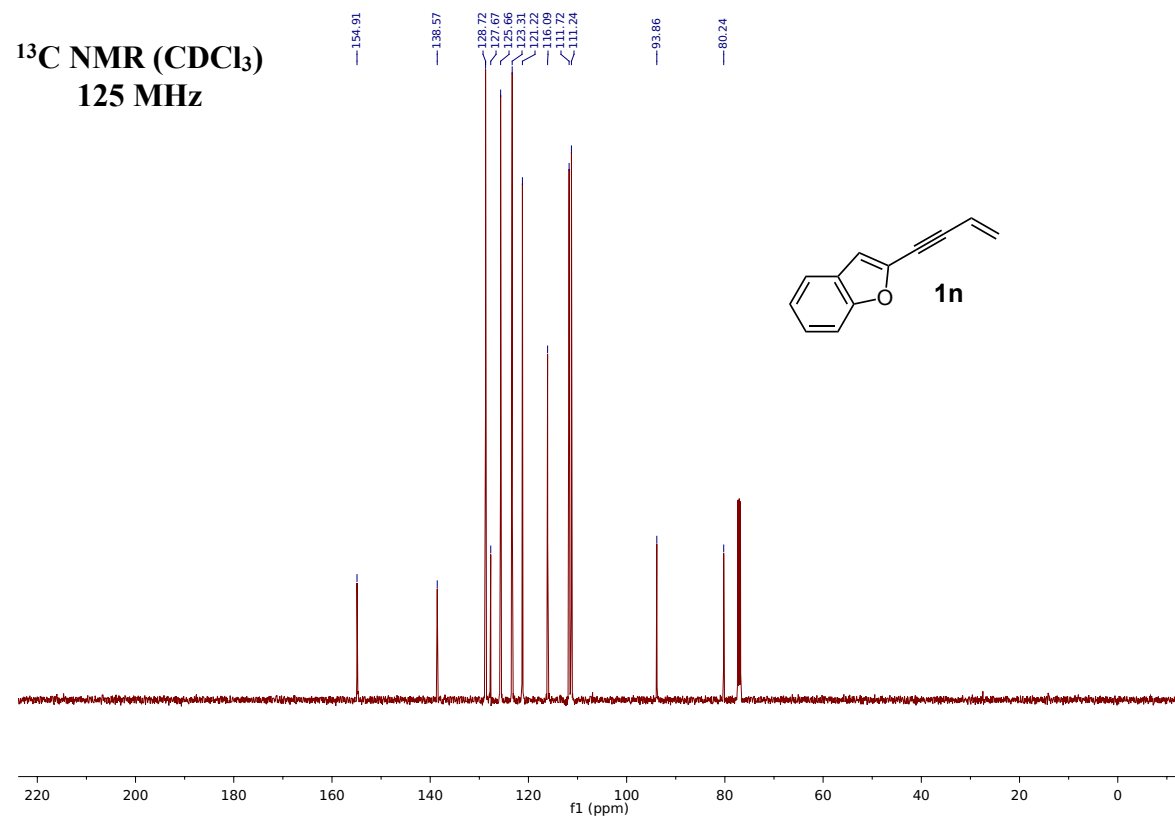

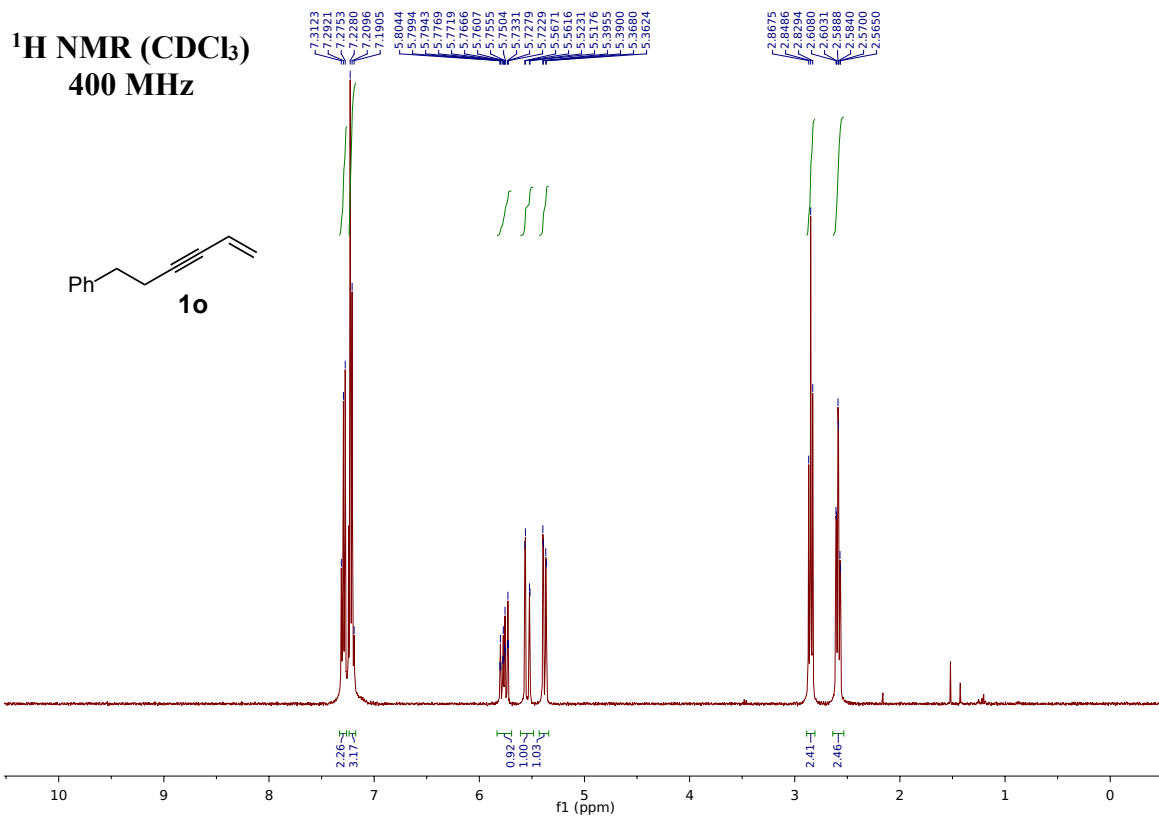

**$^1\text{H}$  NMR ( $\text{CDCl}_3$ )**  
400 MHz

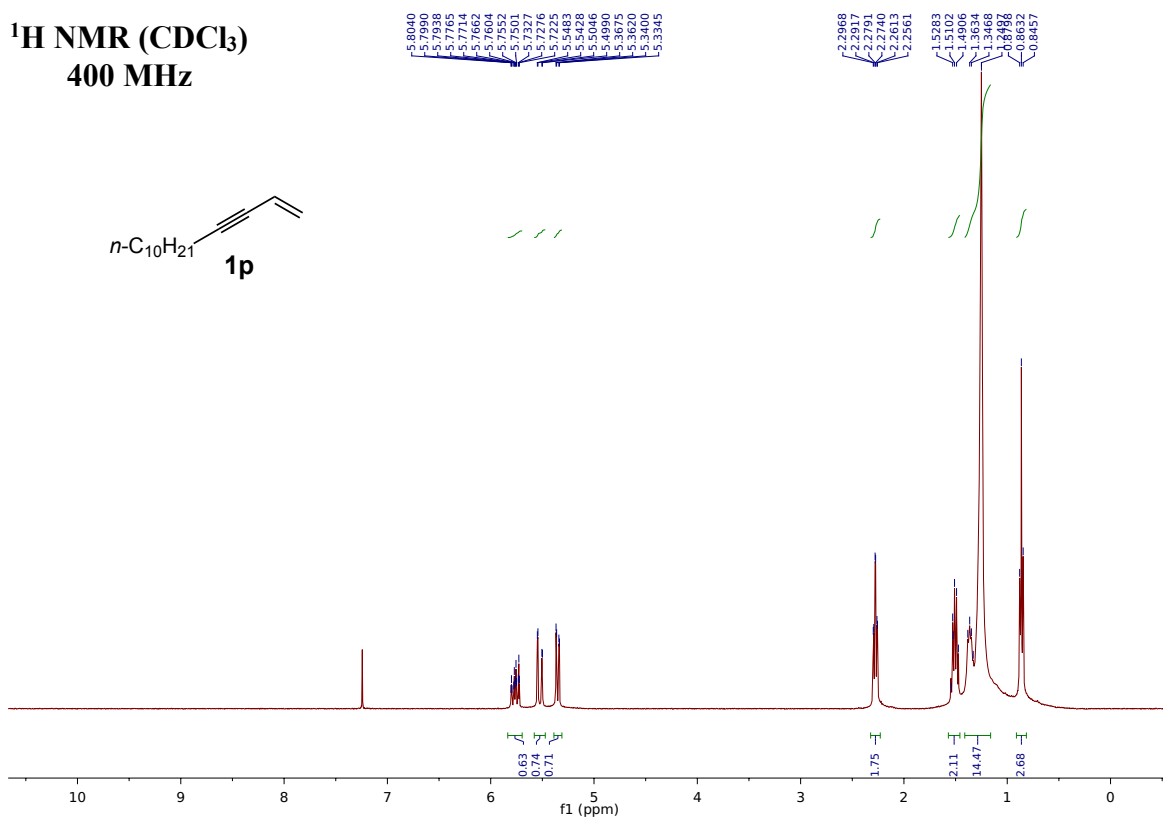

**$^{13}\text{C}$  NMR ( $\text{CDCl}_3$ )**  
125 MHz

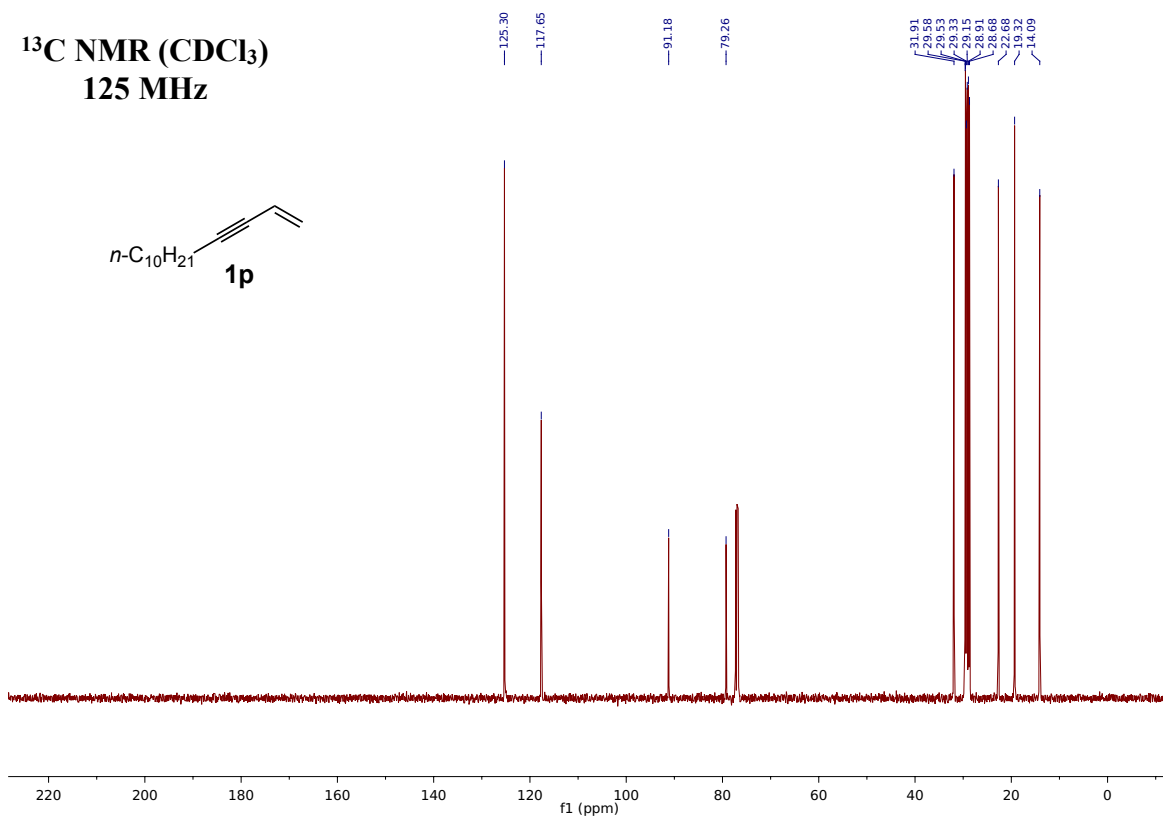

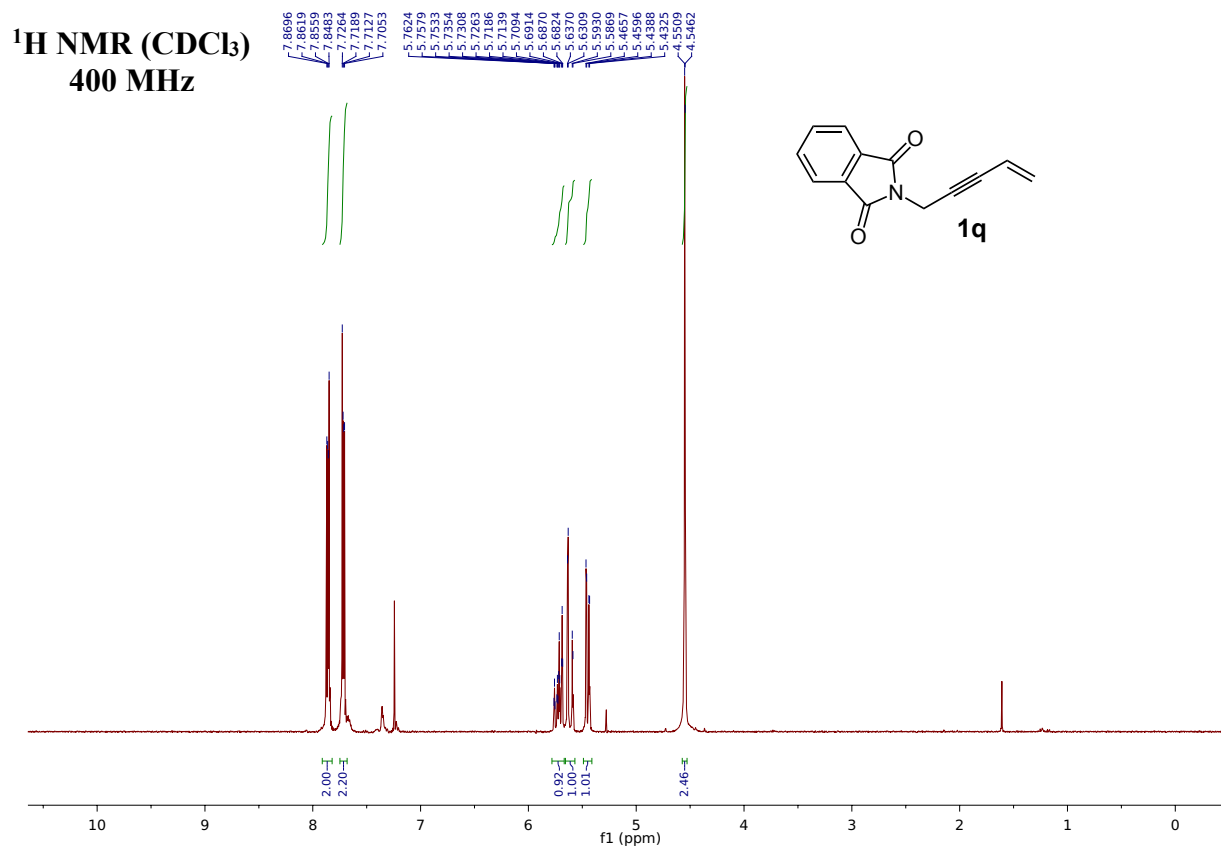

$^1\text{H}$  NMR ( $\text{CDCl}_3$ )  
400 MHz

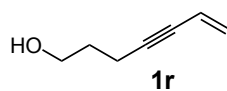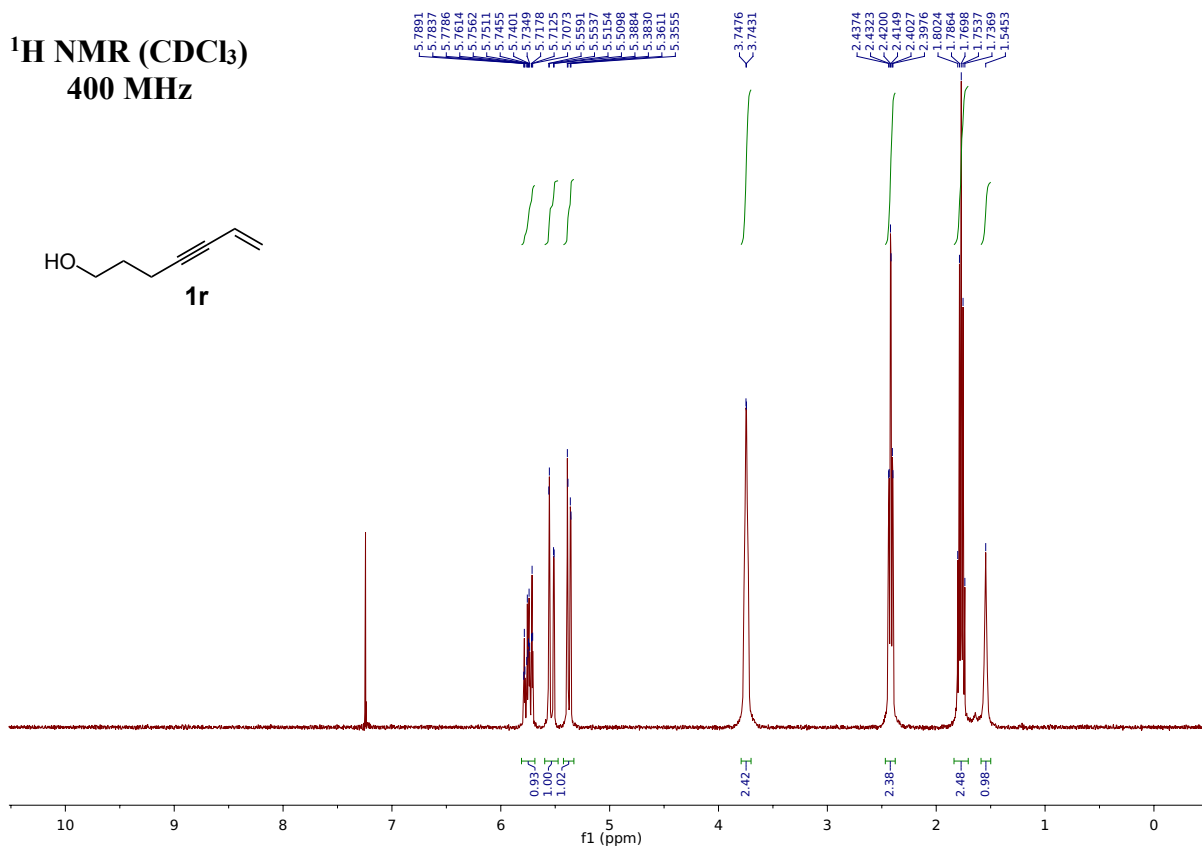

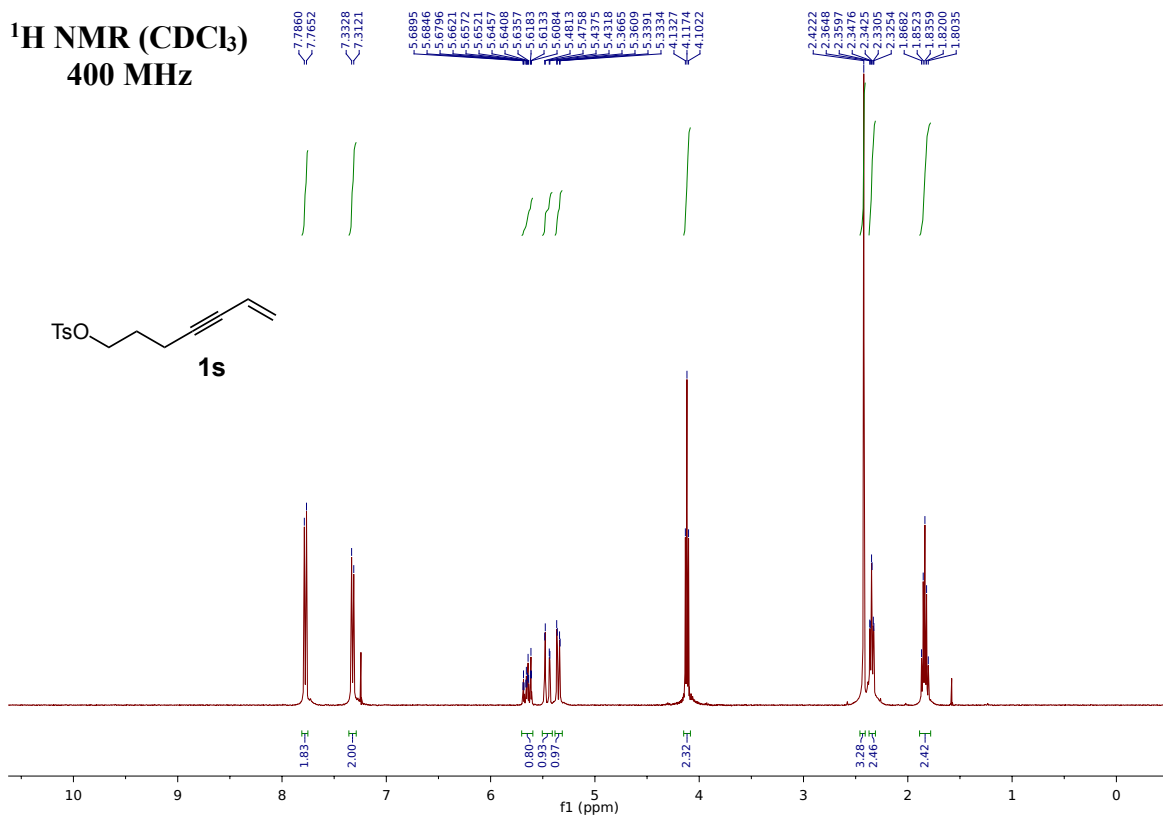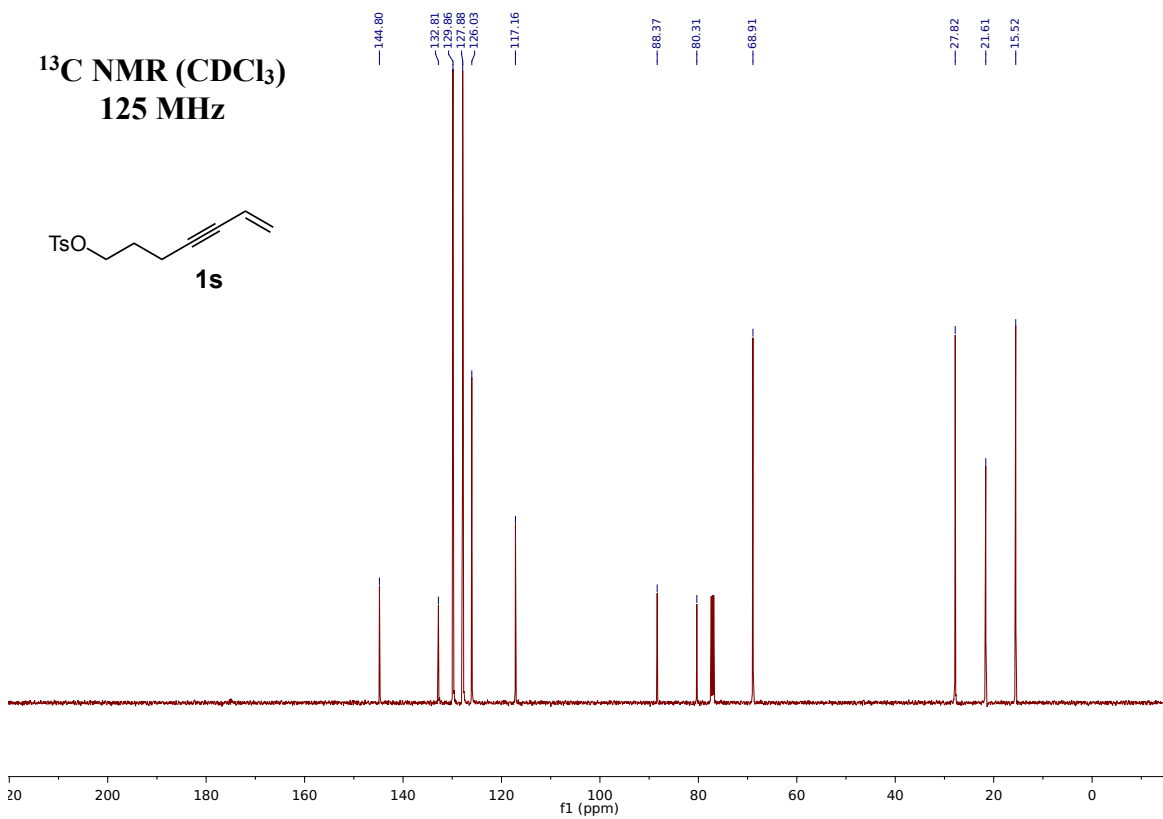



$^1\text{H}$  NMR ( $\text{CDCl}_3$ )  
400 MHz

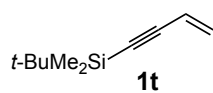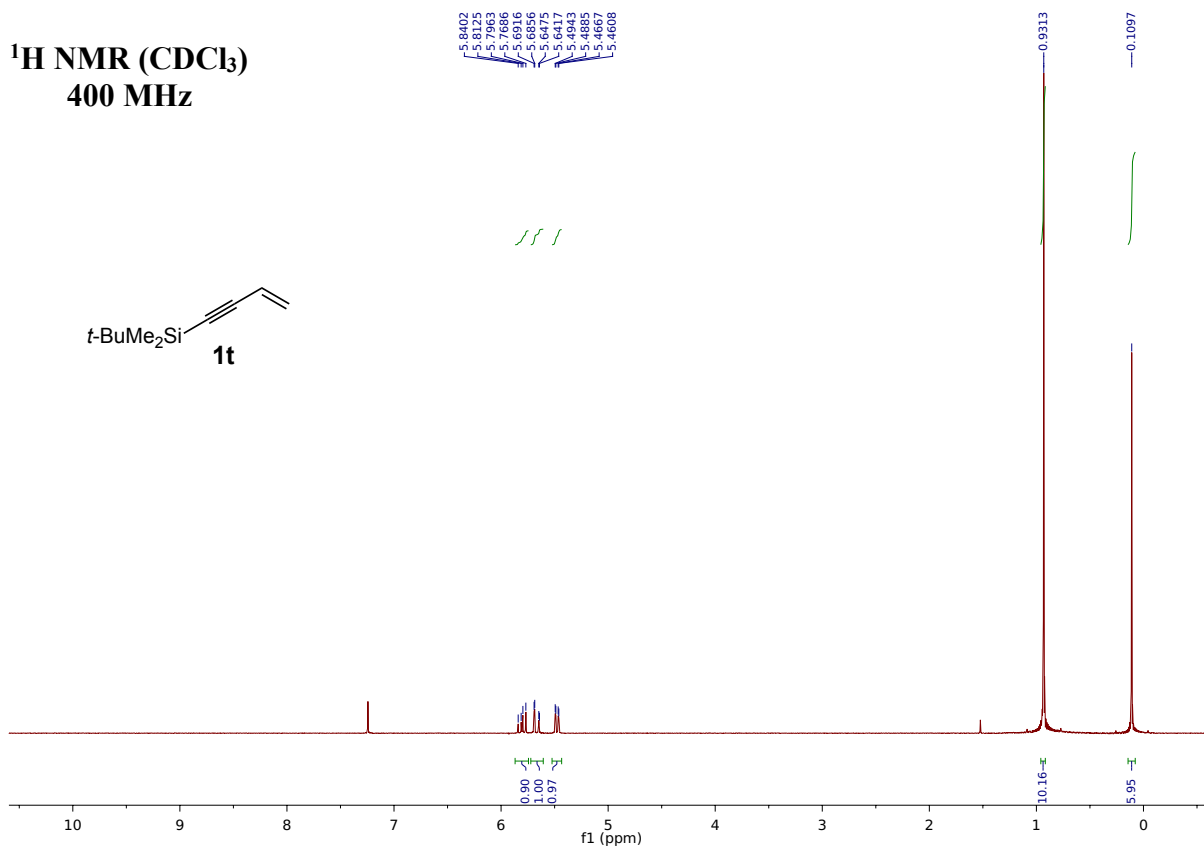

$^1\text{H}$  NMR ( $\text{CDCl}_3$ )  
400 MHz

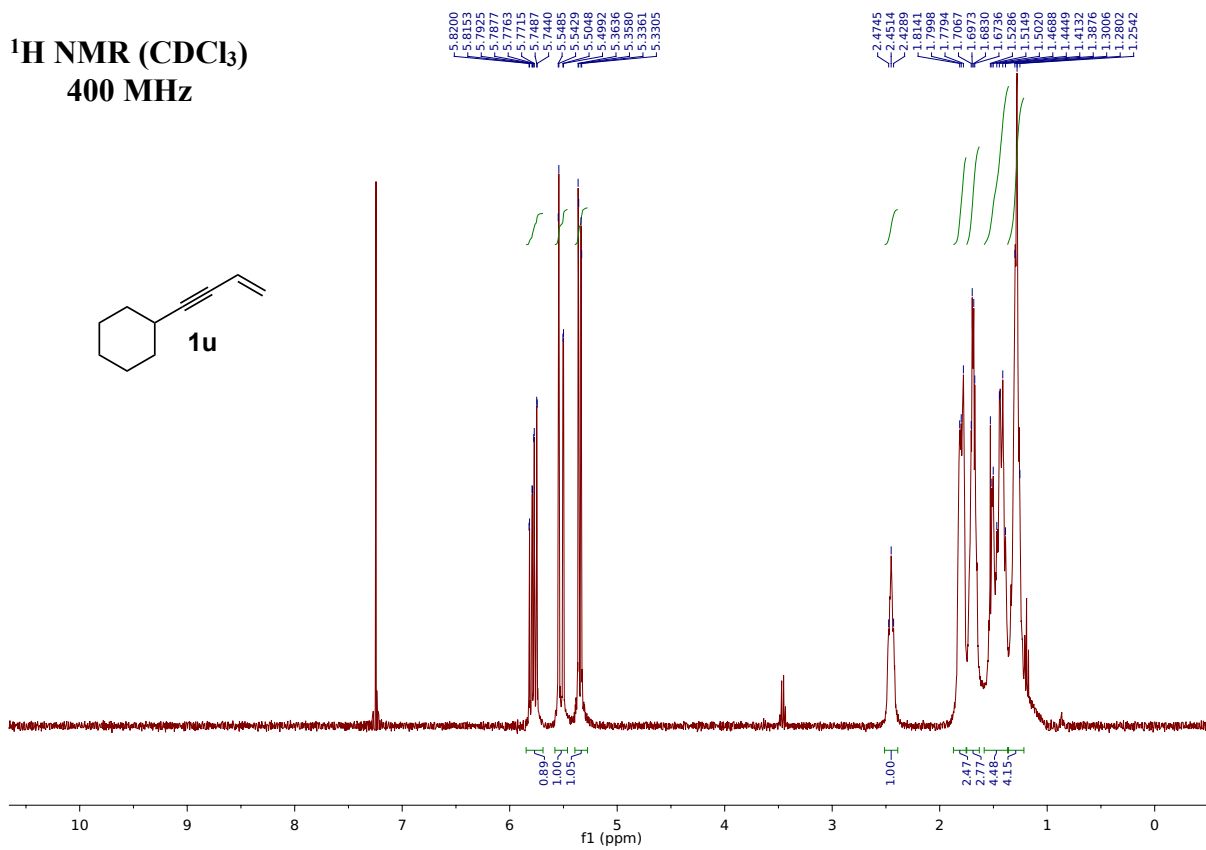

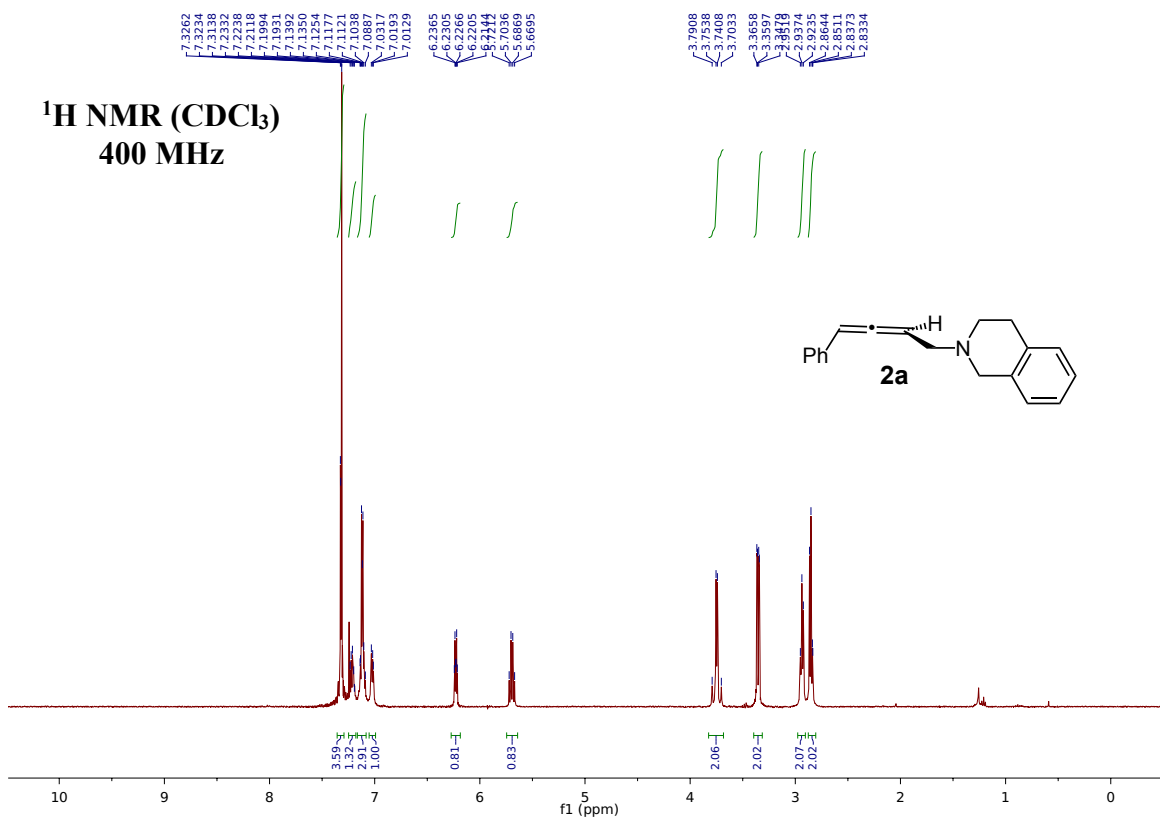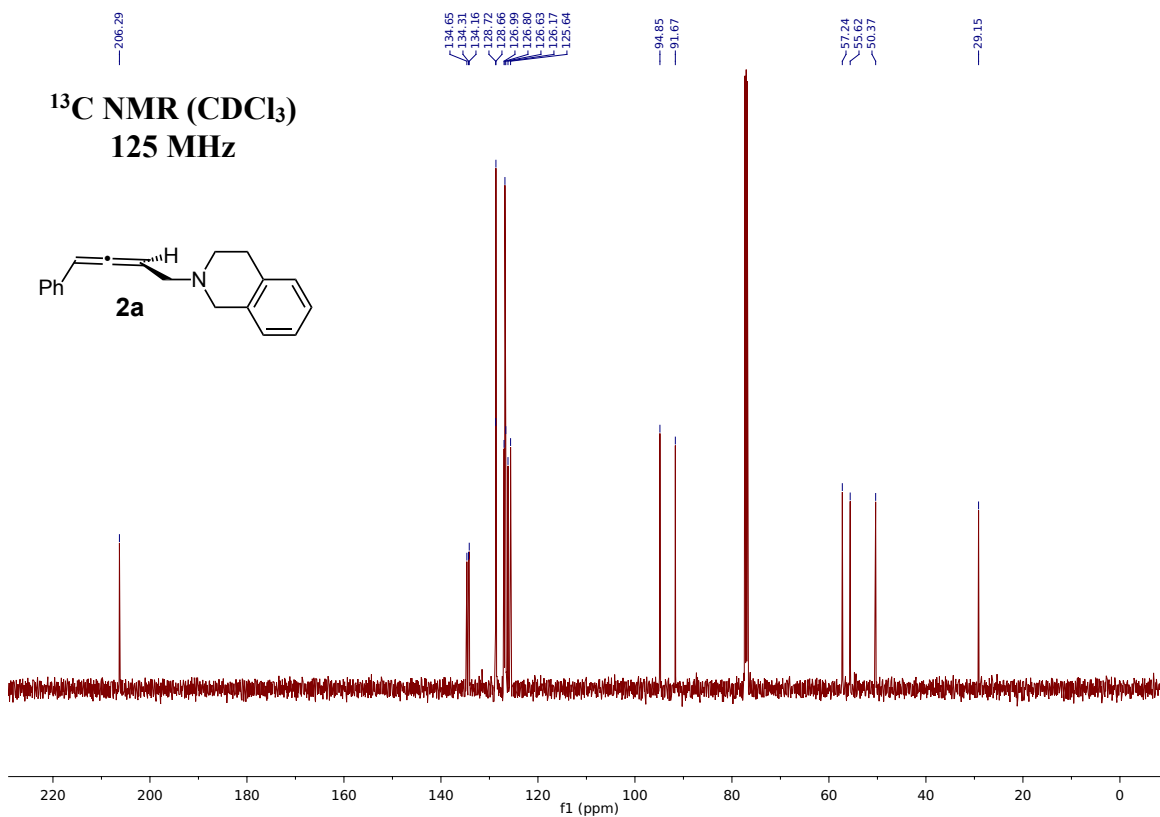

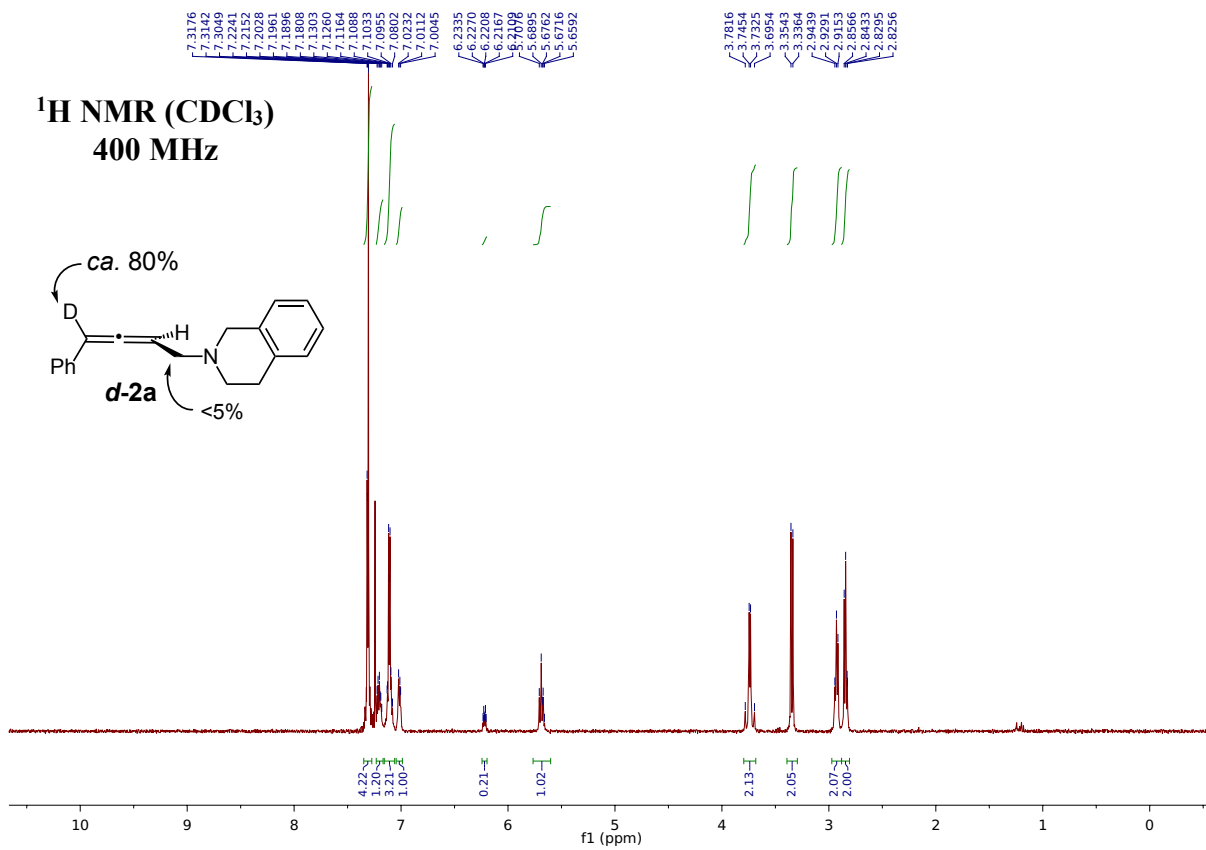

**<sup>1</sup>H NMR (CDCl<sub>3</sub>)  
400 MHz**

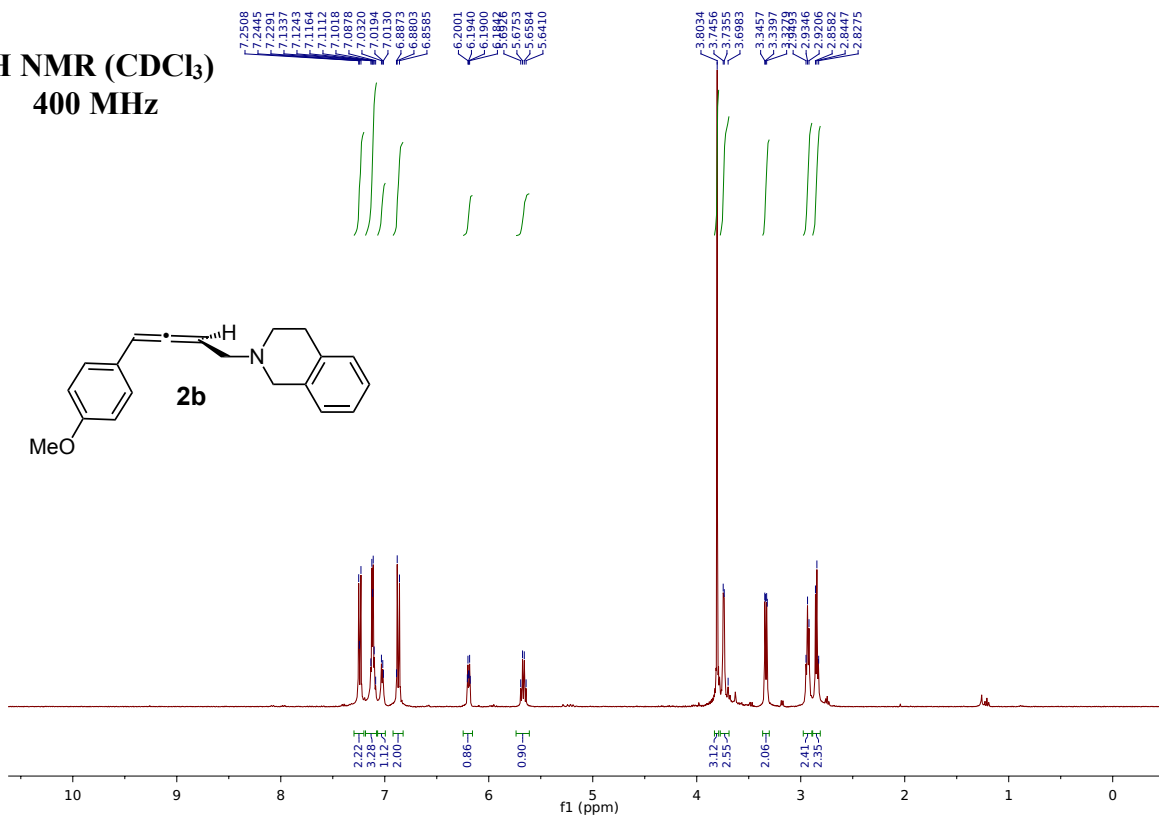

**<sup>13</sup>C NMR (CDCl<sub>3</sub>)  
125 MHz**

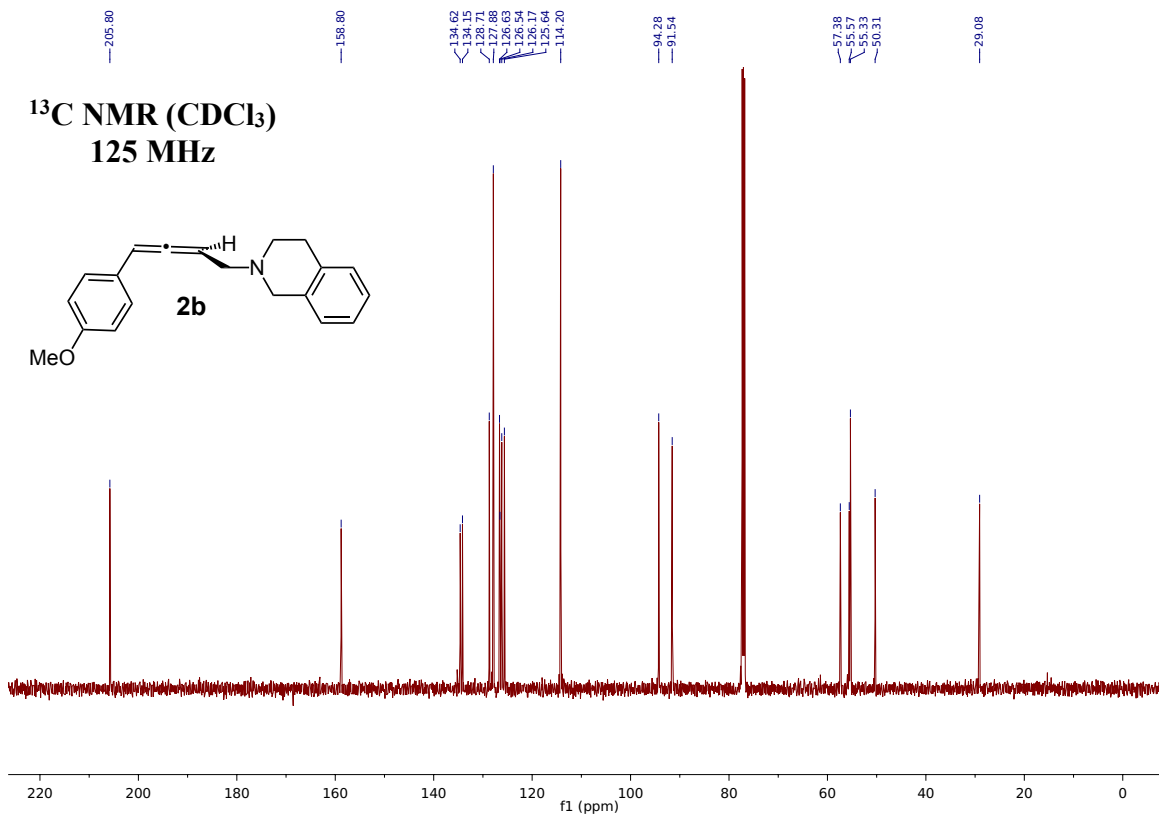

**<sup>1</sup>H NMR (CDCl<sub>3</sub>)  
400 MHz**

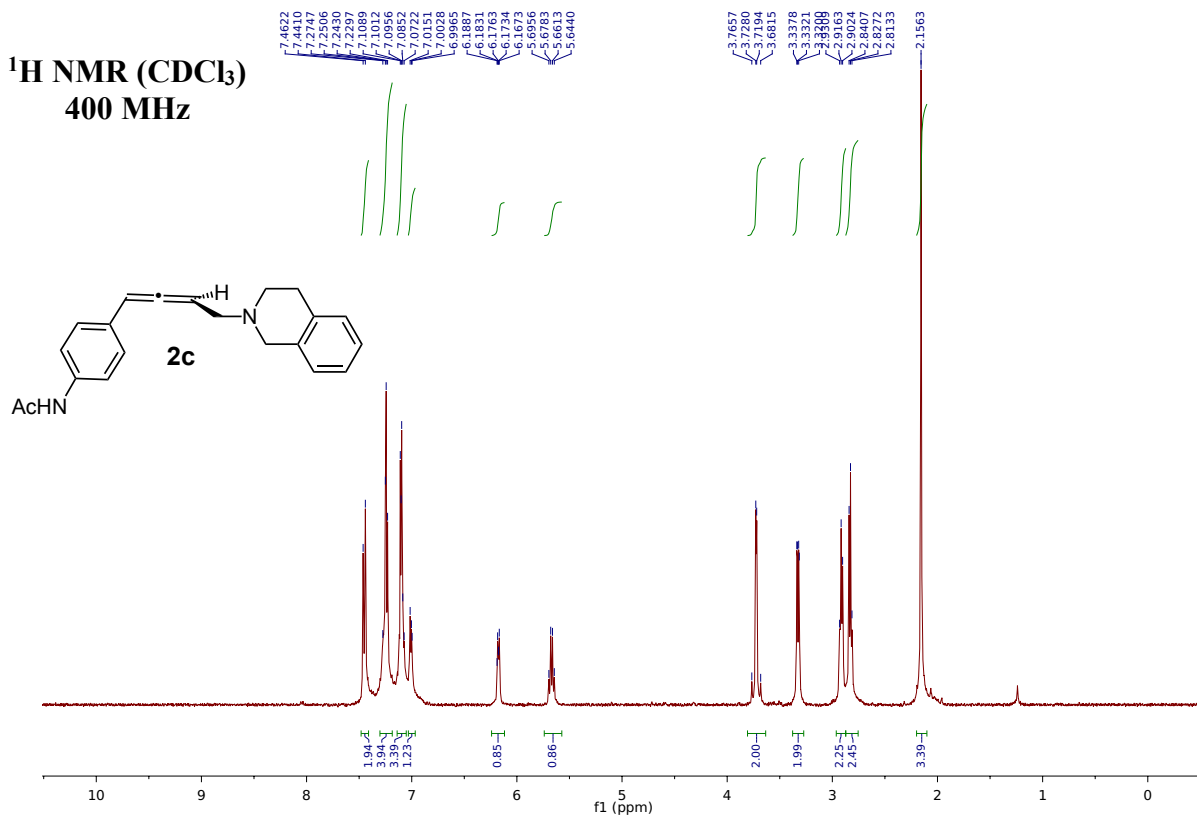

**<sup>13</sup>C NMR (CDCl<sub>3</sub>)  
125 MHz**

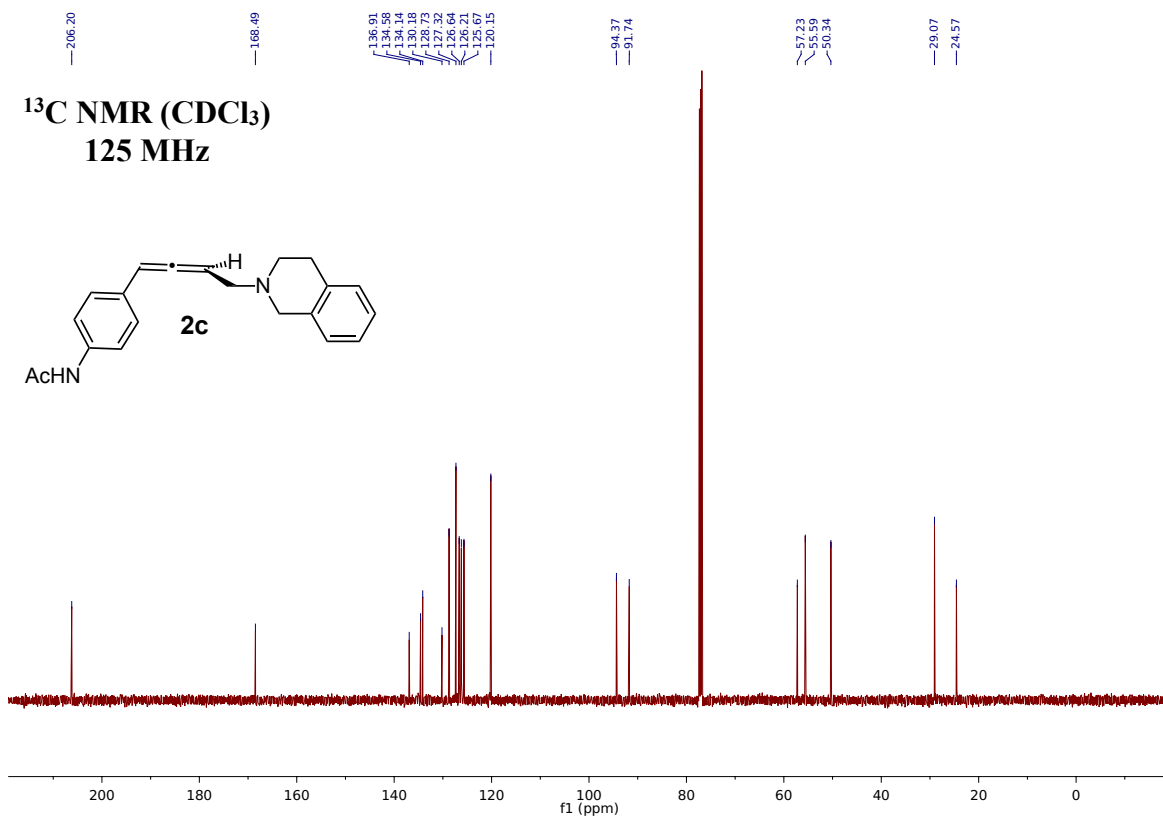

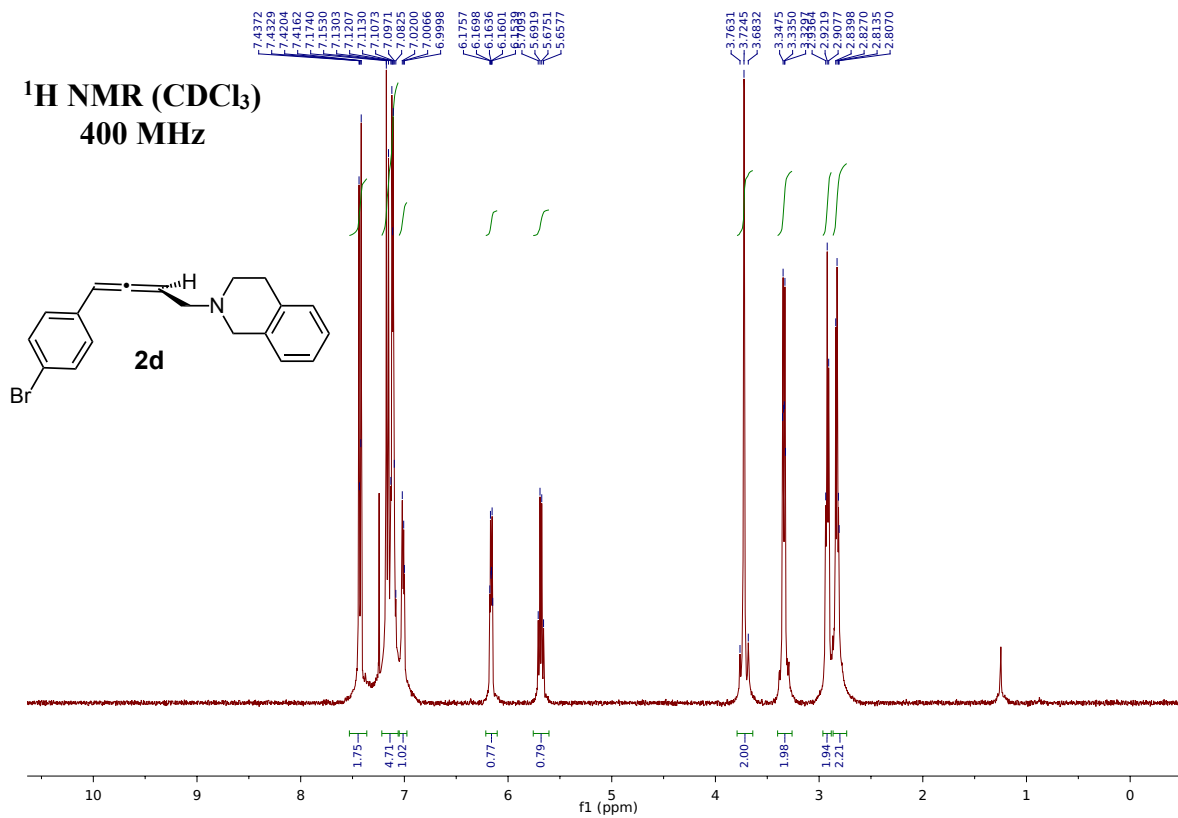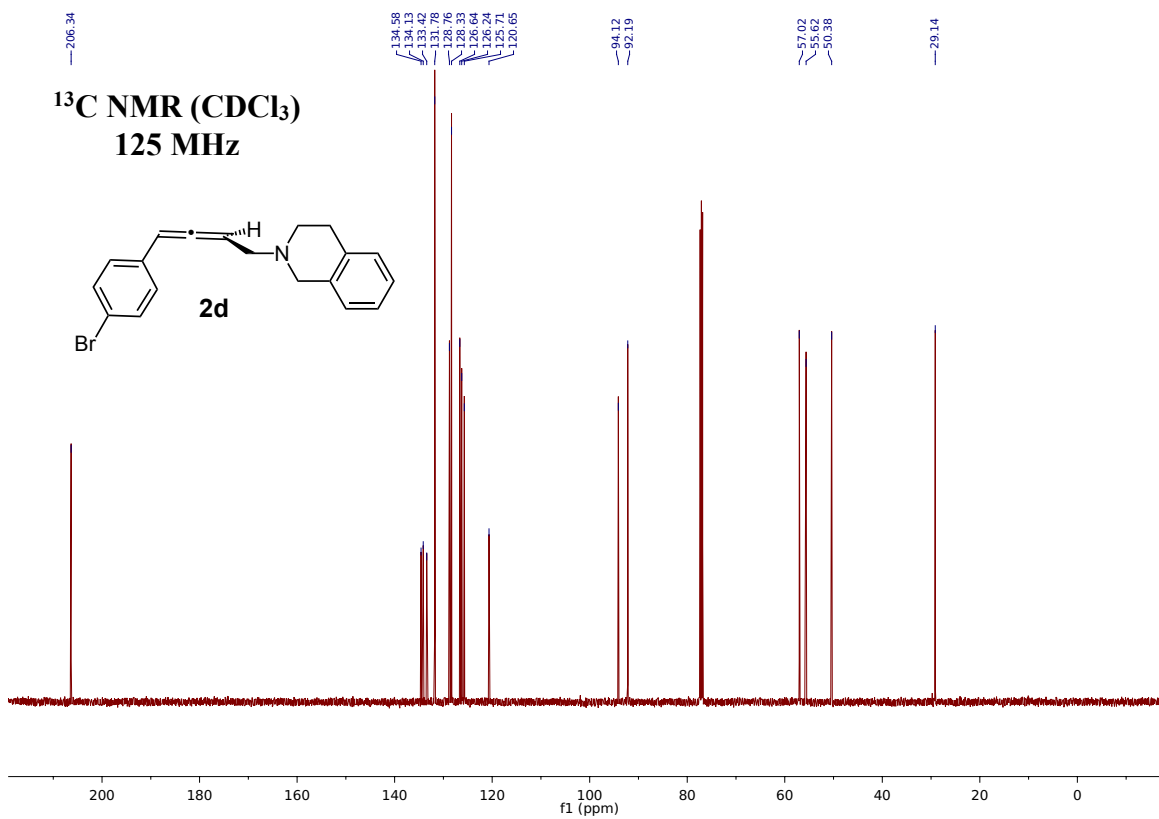

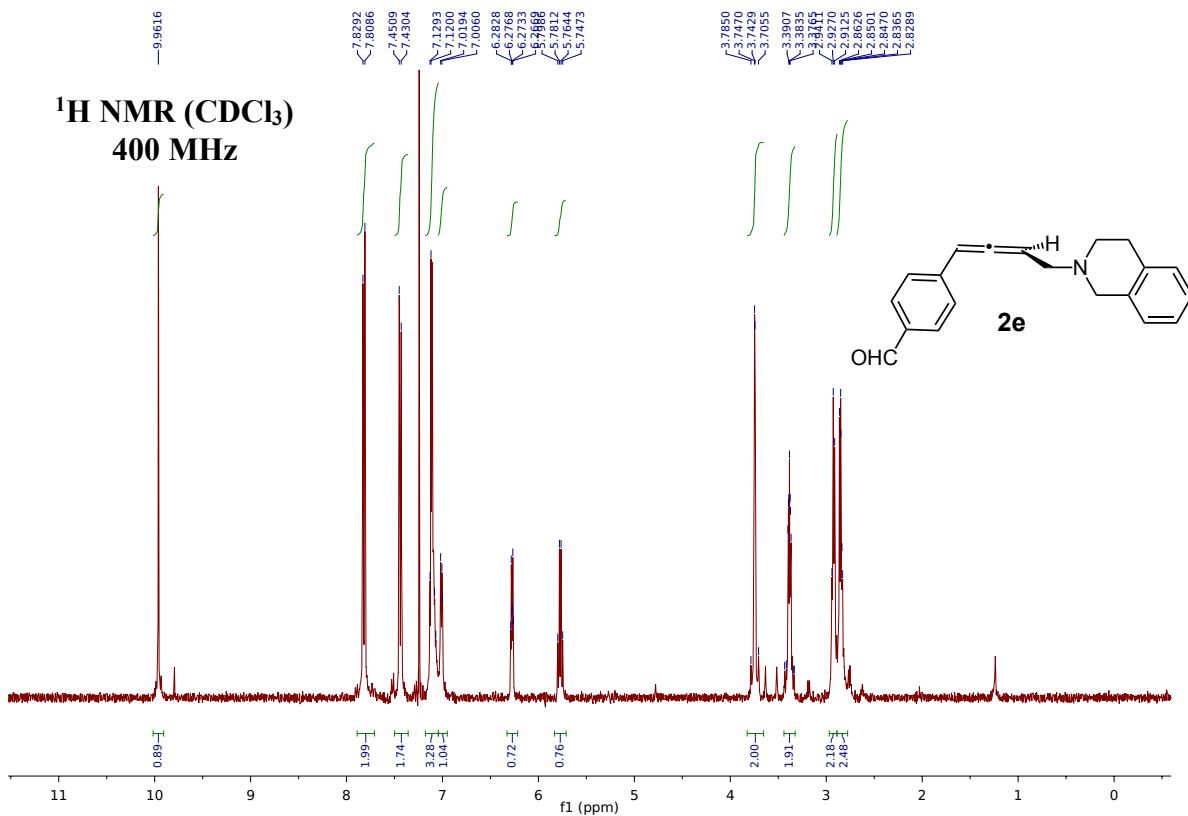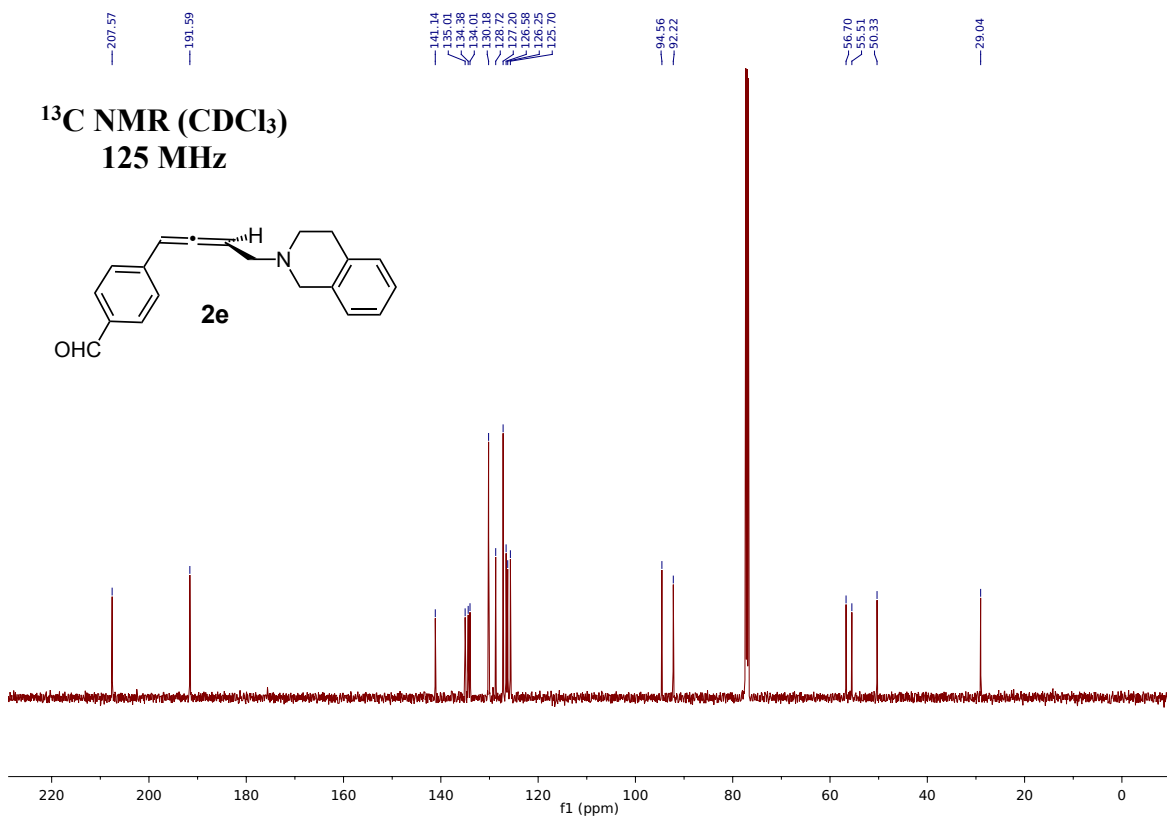



**<sup>1</sup>H NMR (CDCl<sub>3</sub>)  
400 MHz**

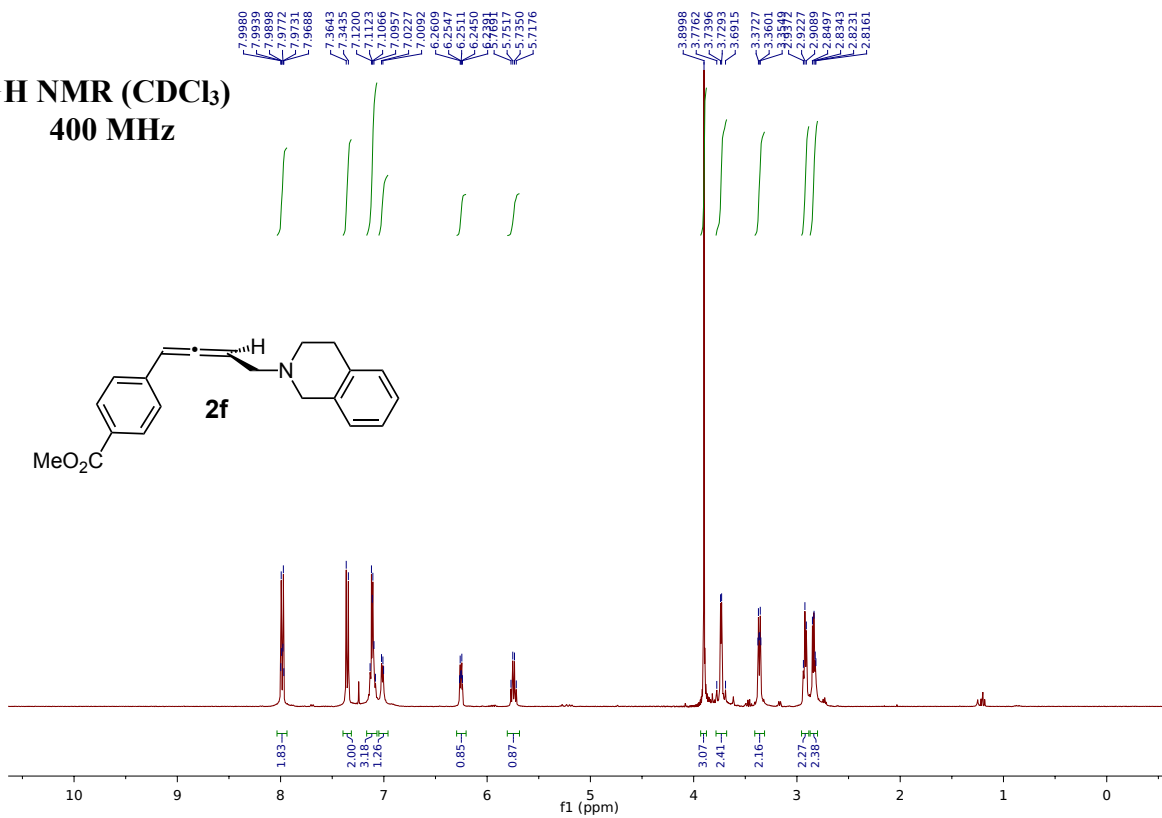

**<sup>13</sup>C NMR (CDCl<sub>3</sub>)  
125 MHz**

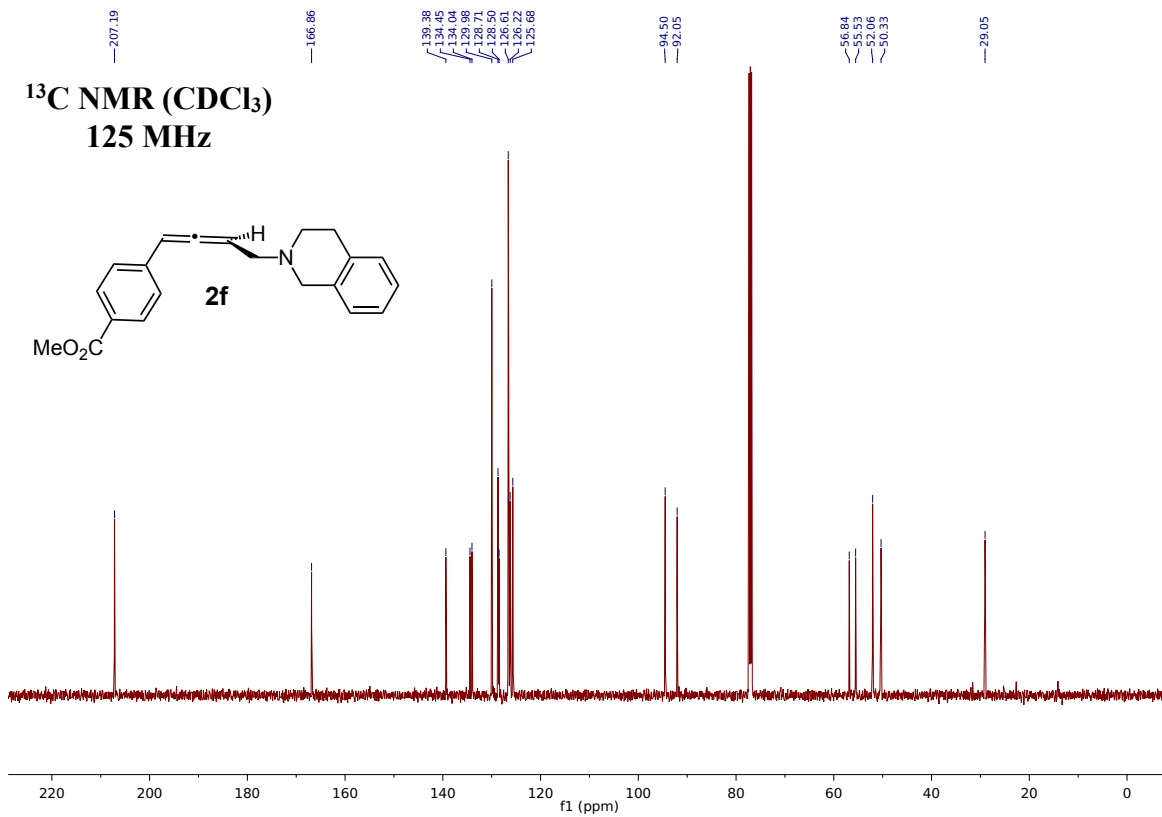

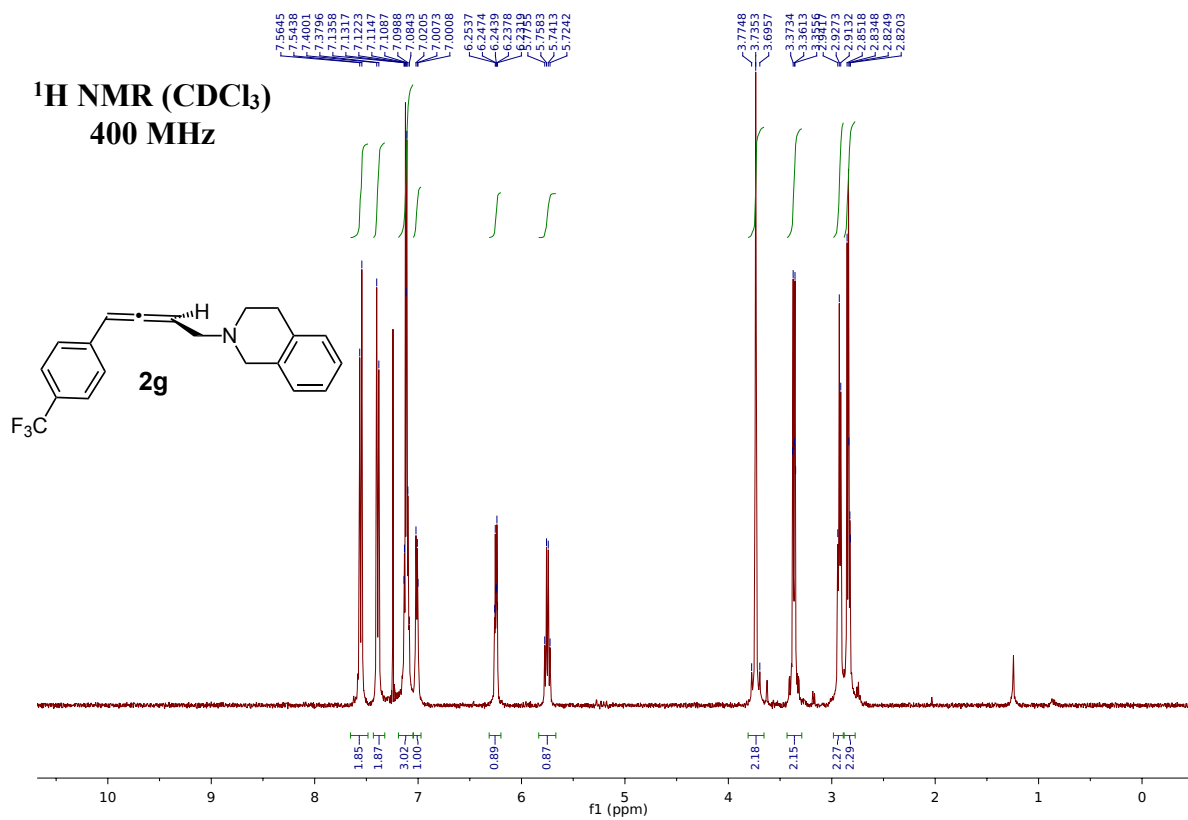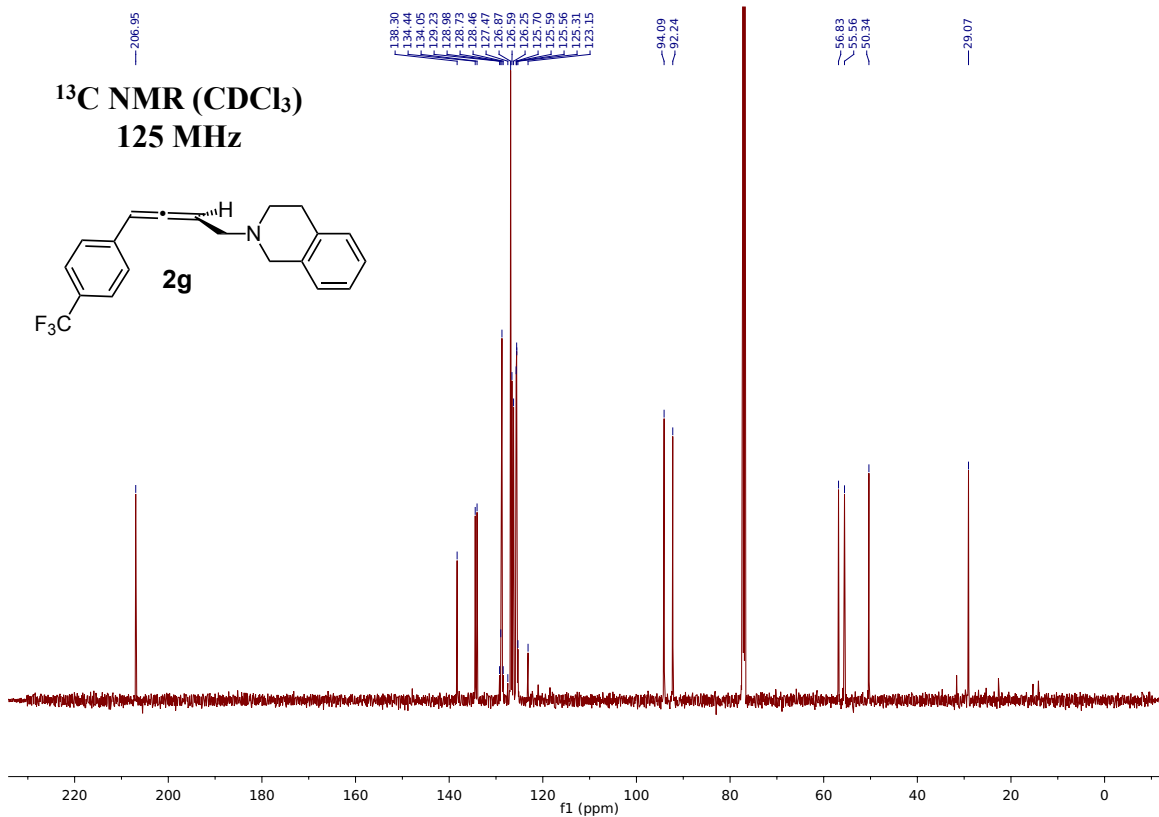

**$^{19}\text{F}$  NMR ( $\text{CDCl}_3$ )**  
**376 MHz**

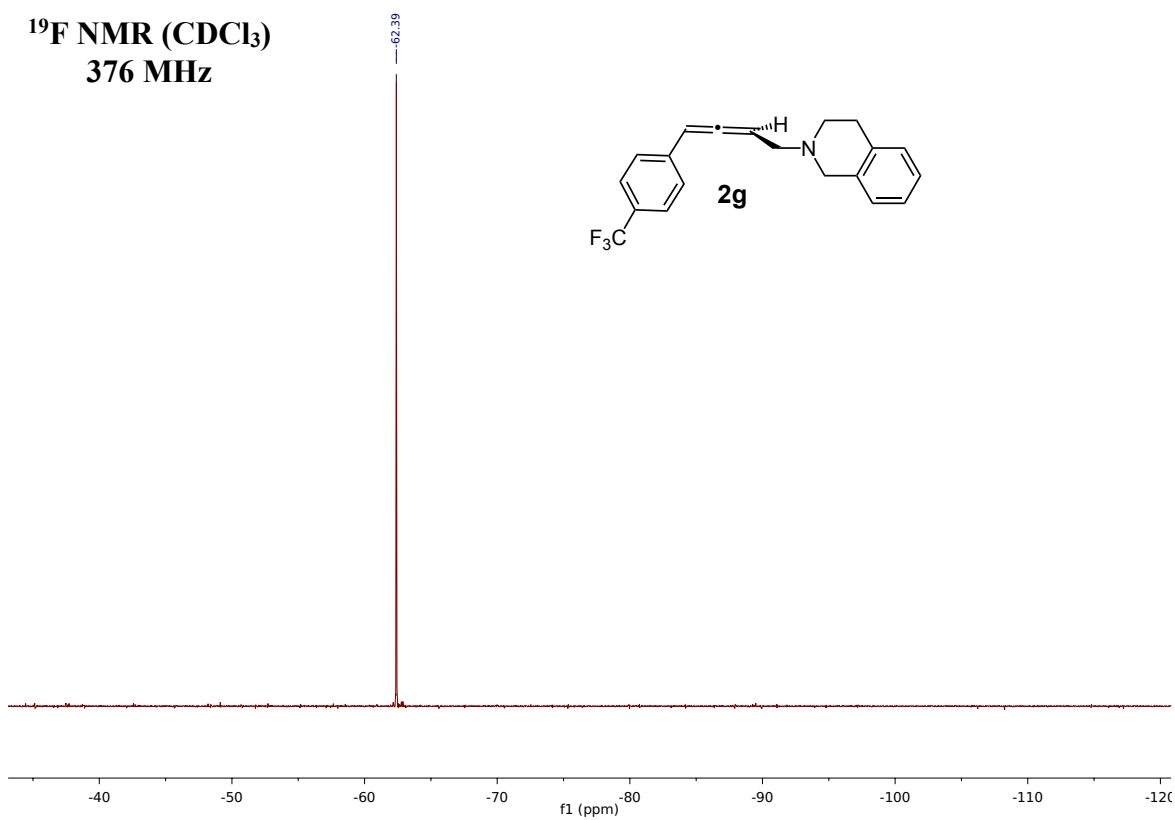

**<sup>1</sup>H NMR (CDCl<sub>3</sub>)  
400 MHz**

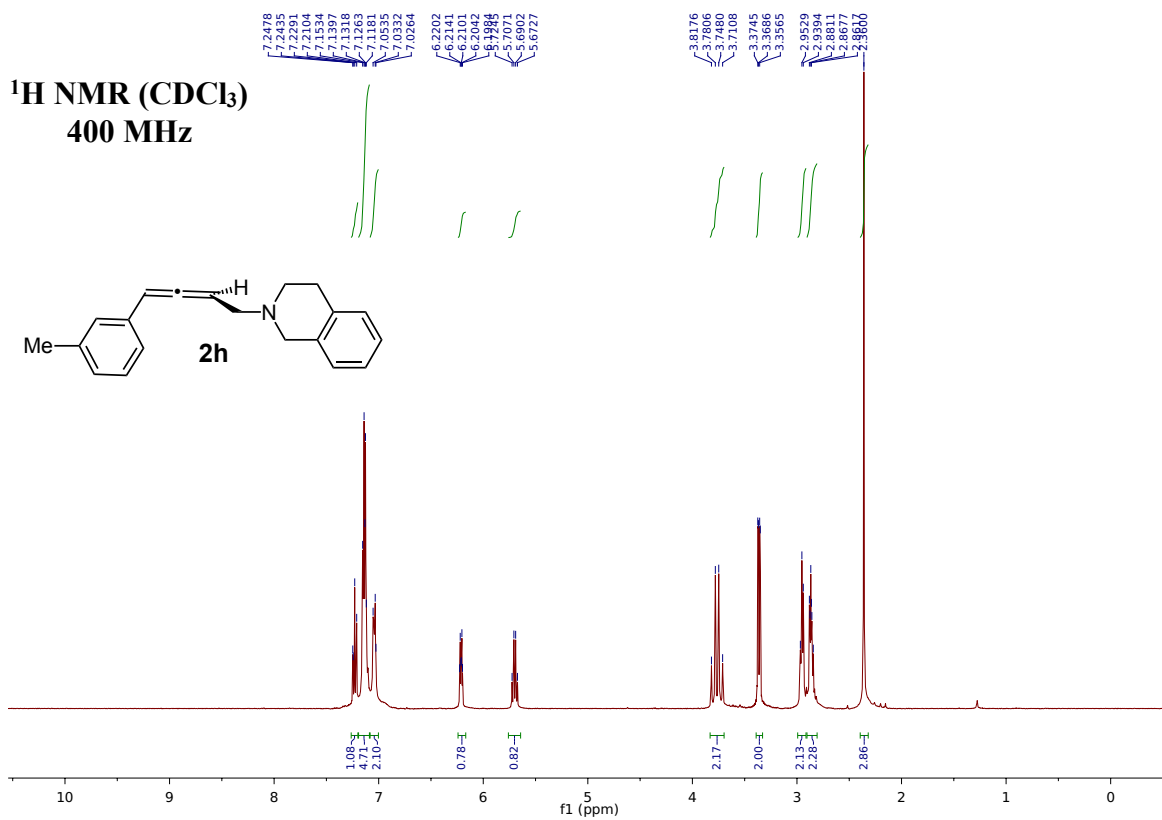

**<sup>13</sup>C NMR (CDCl<sub>3</sub>)  
125 MHz**

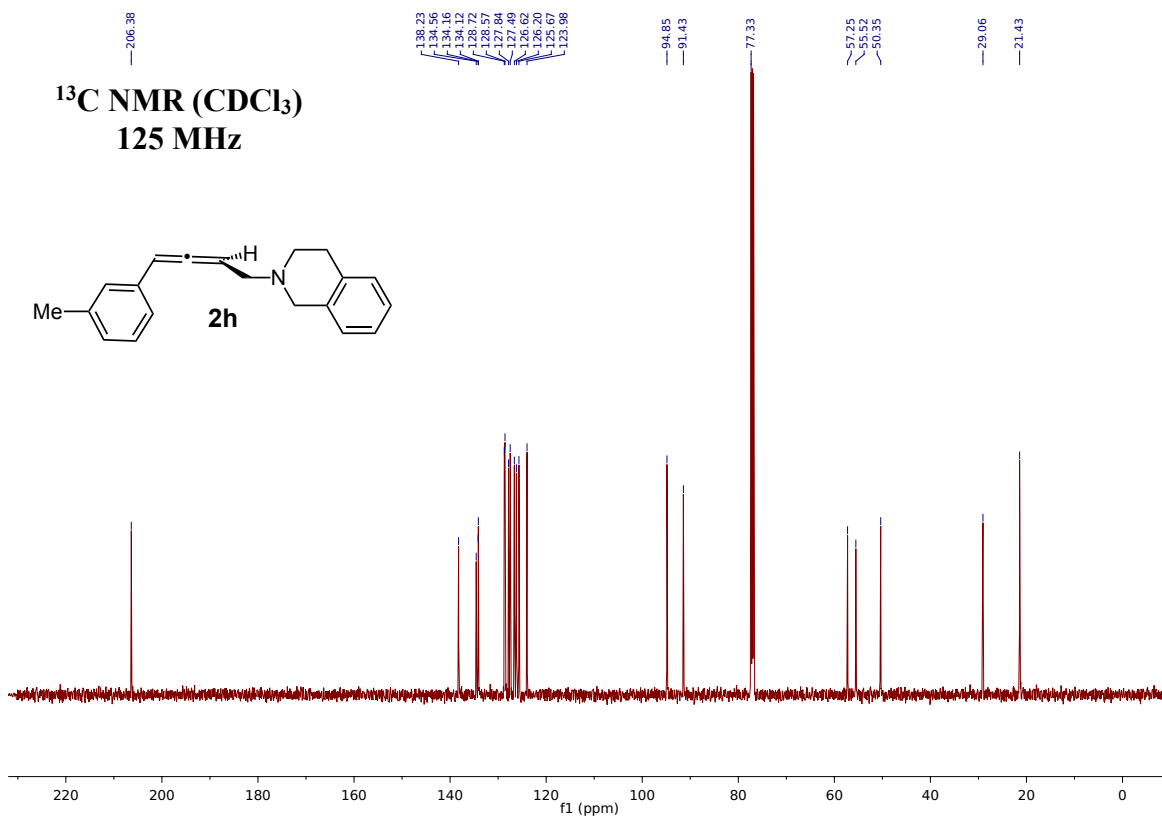

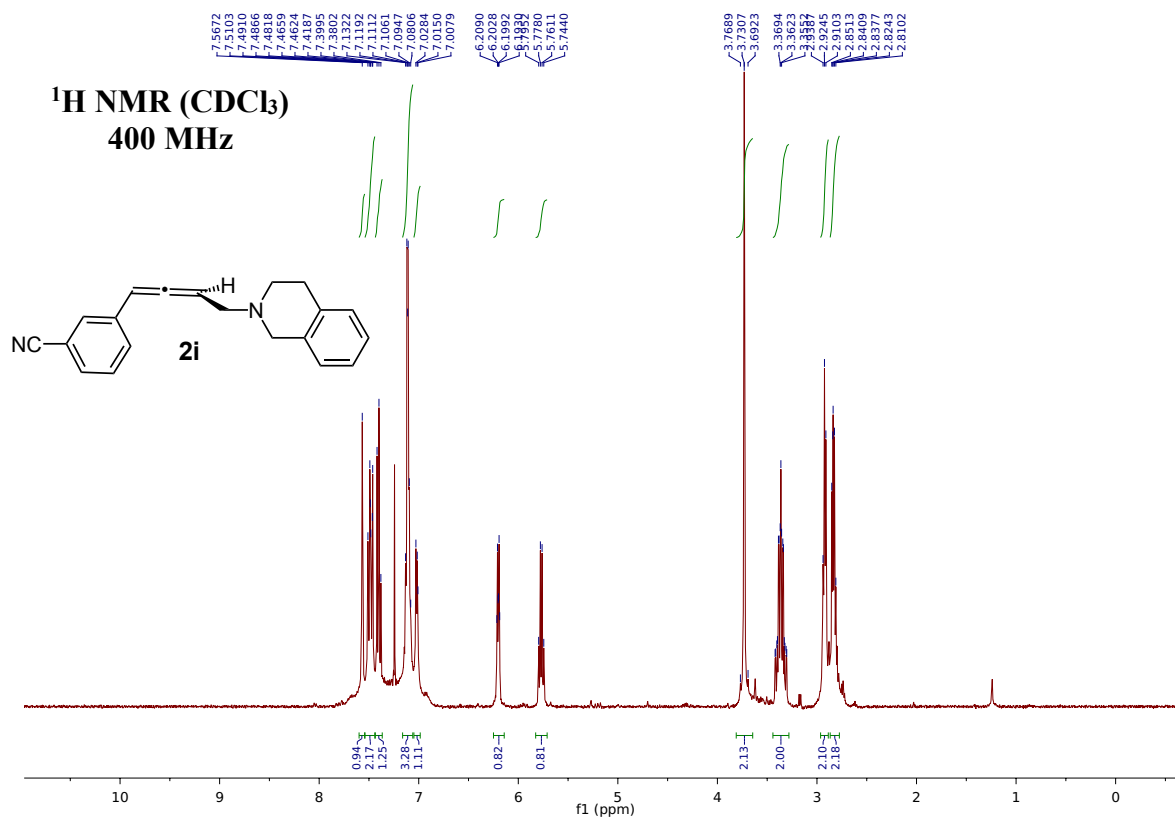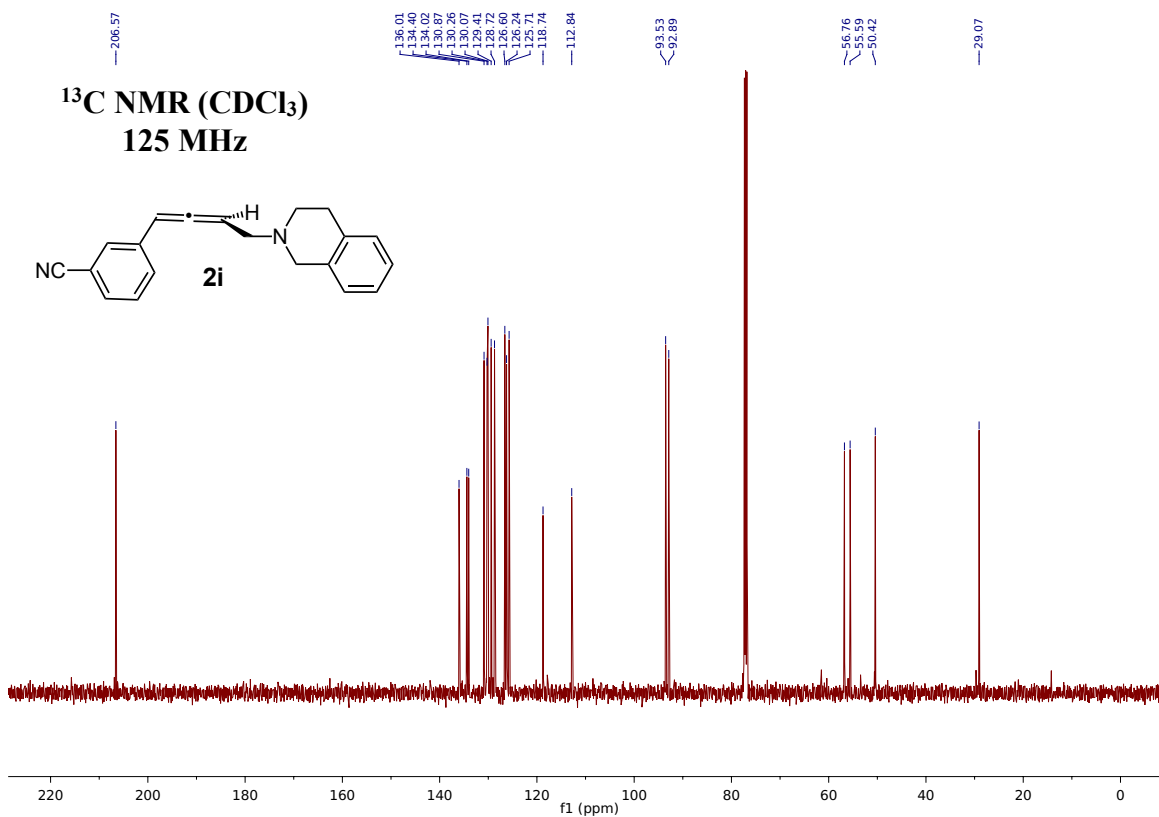

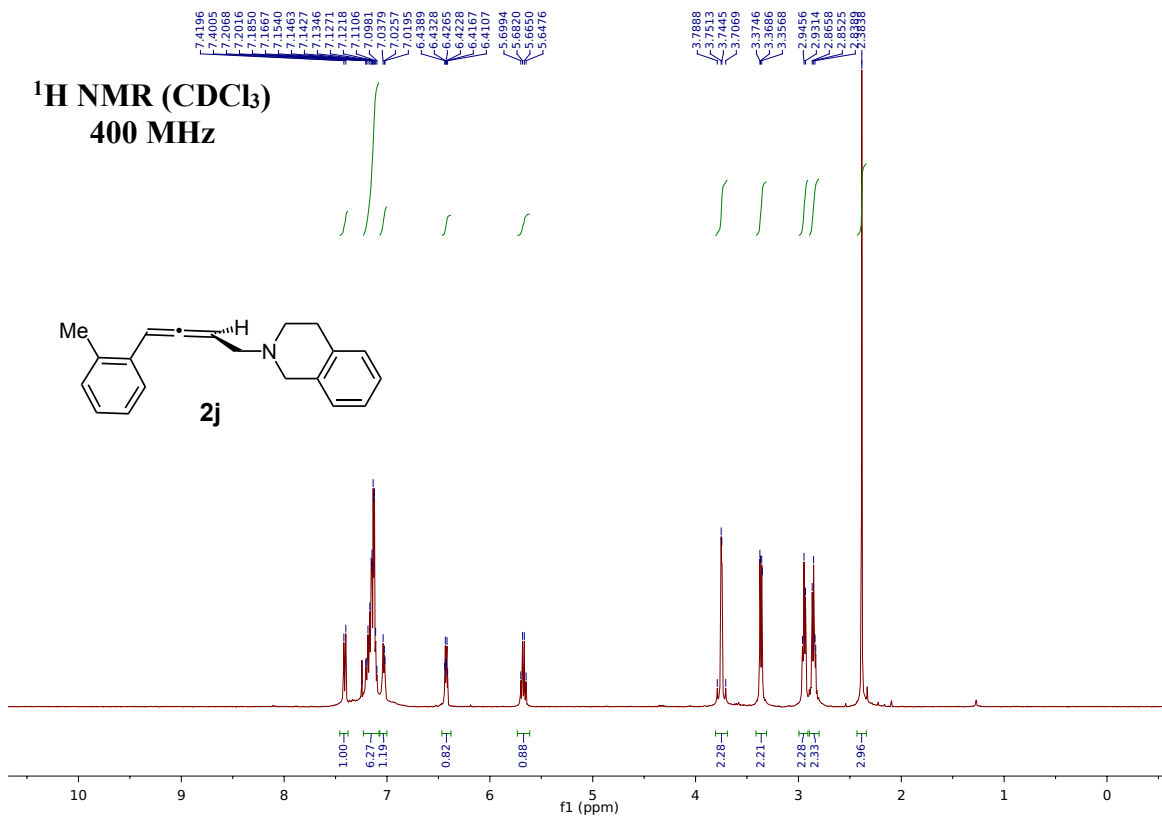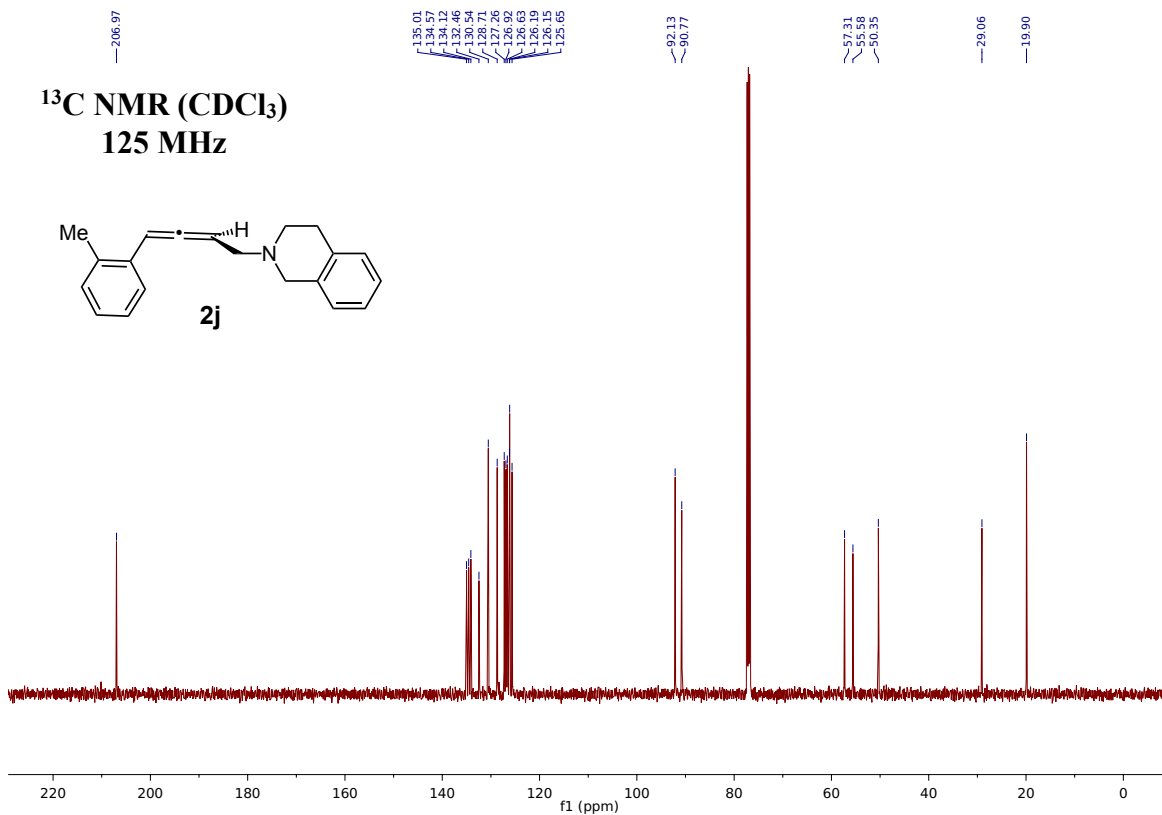

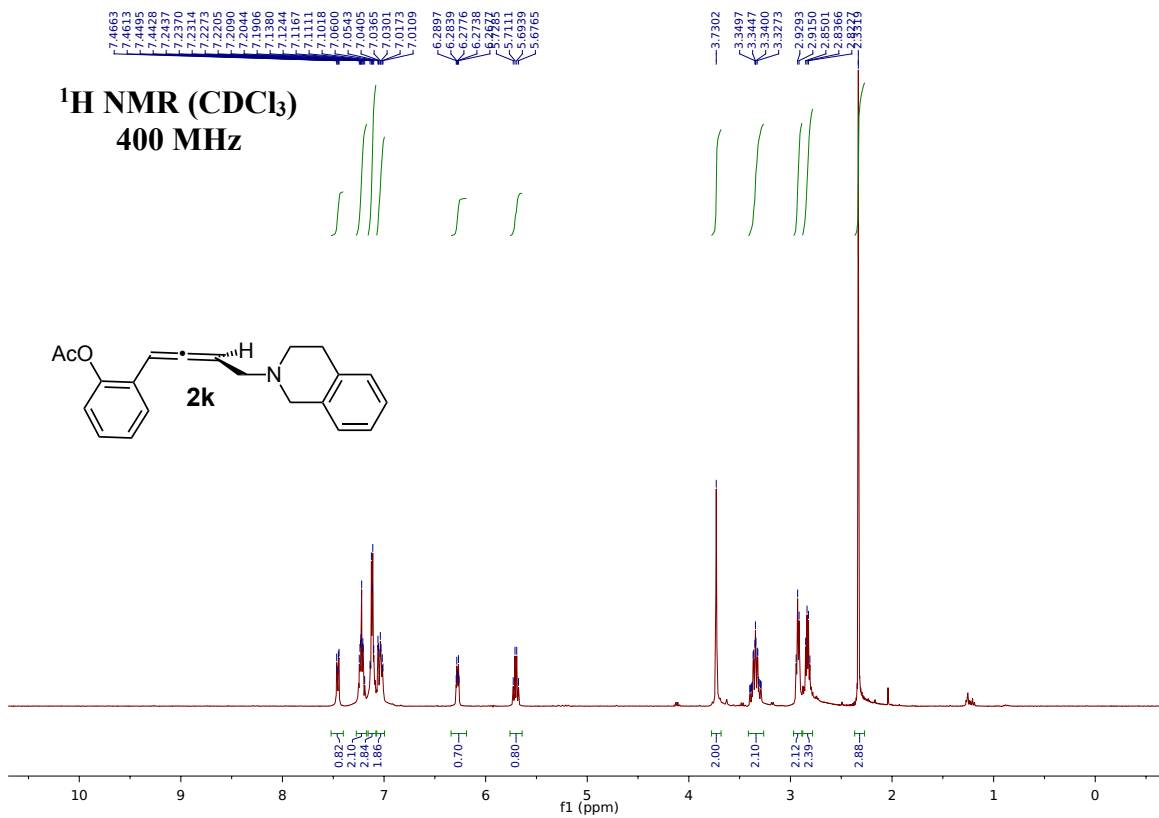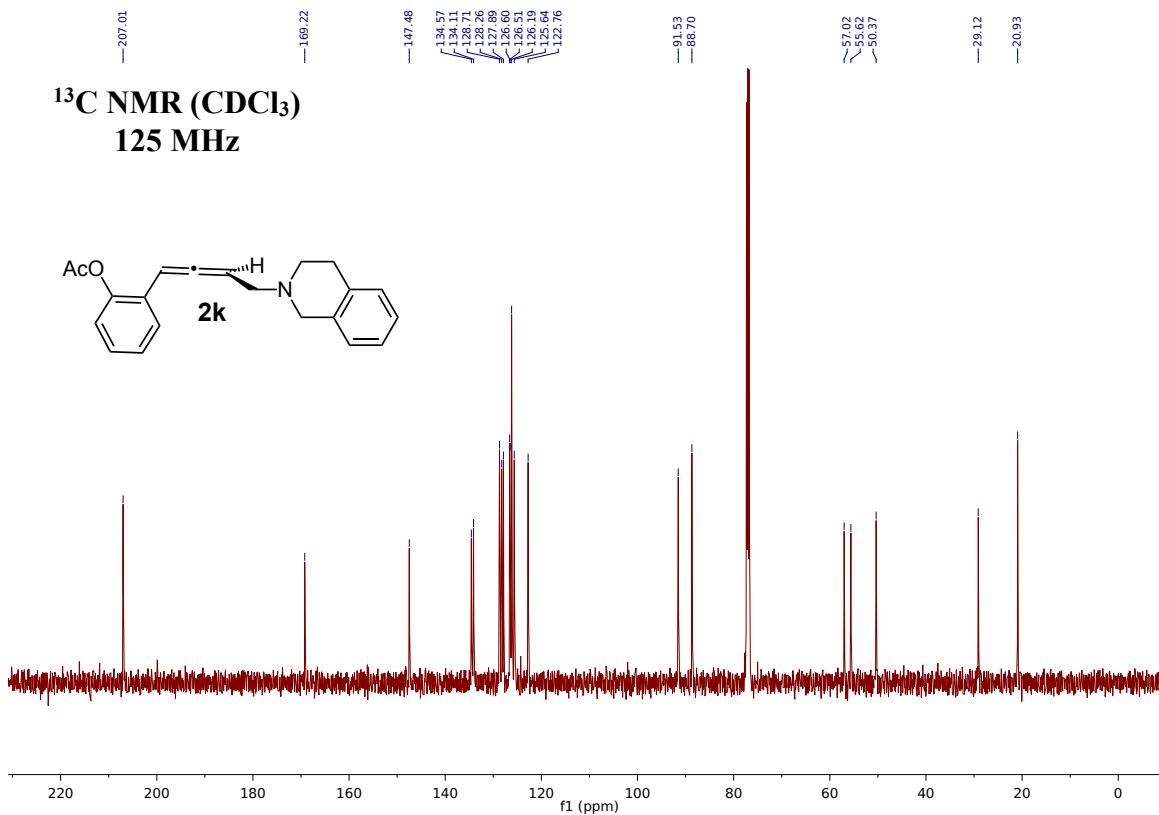

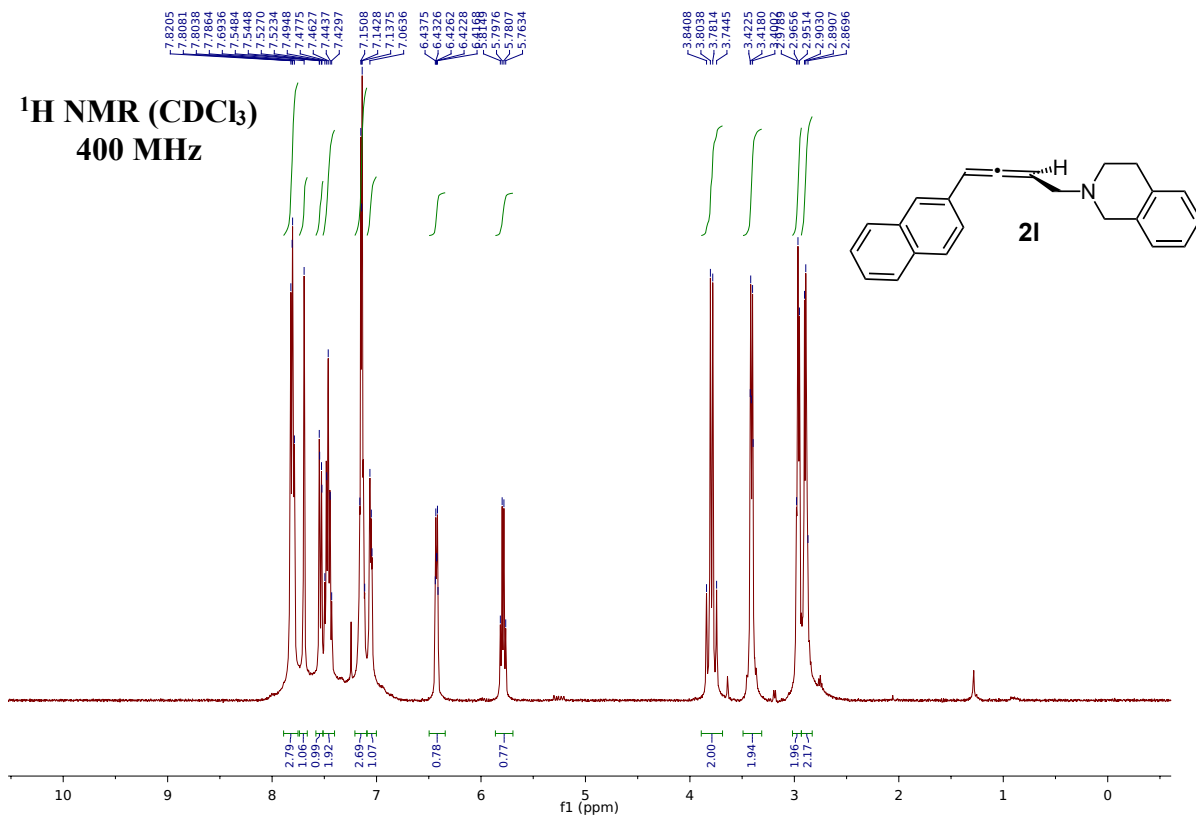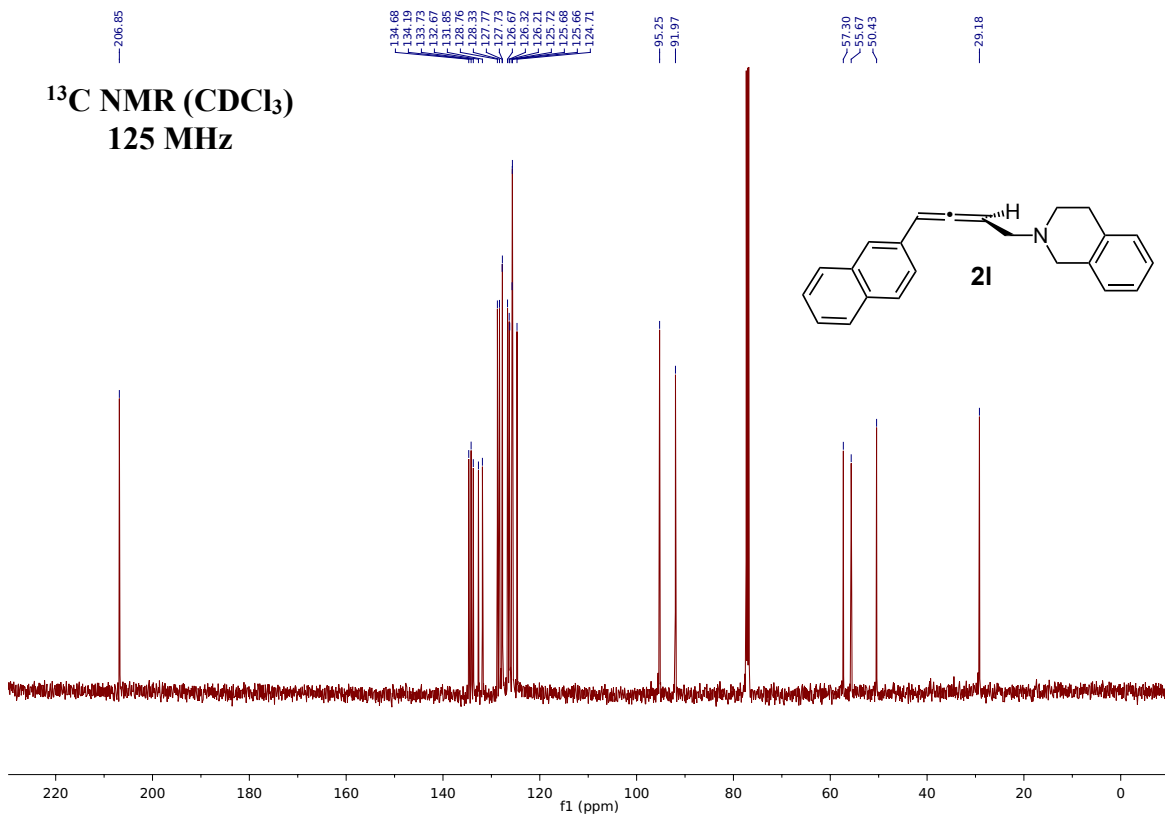



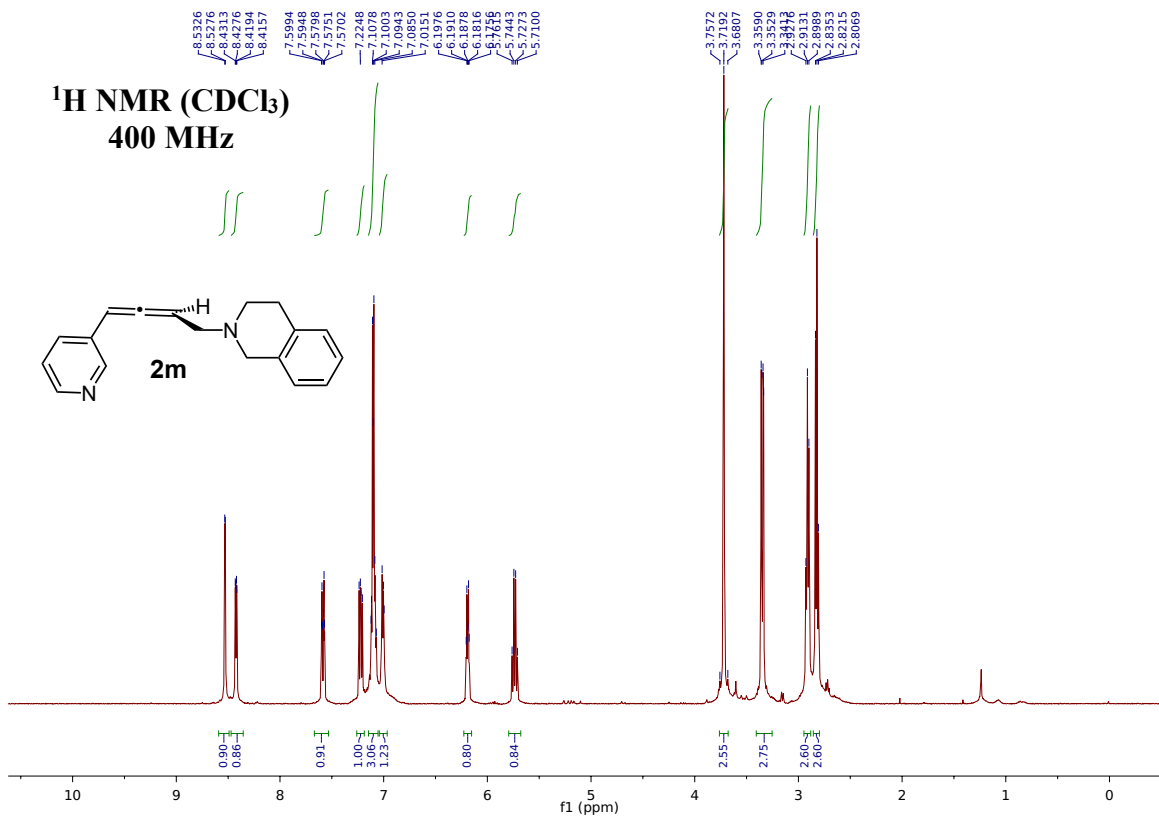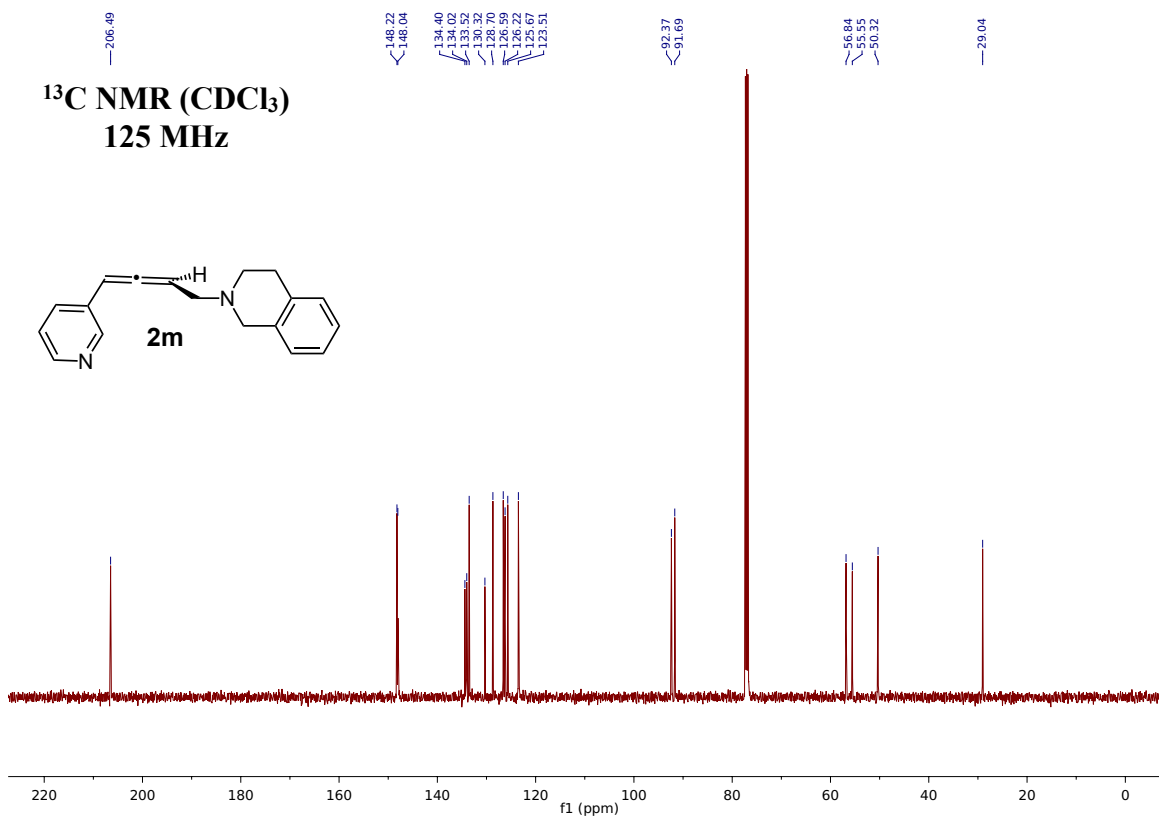

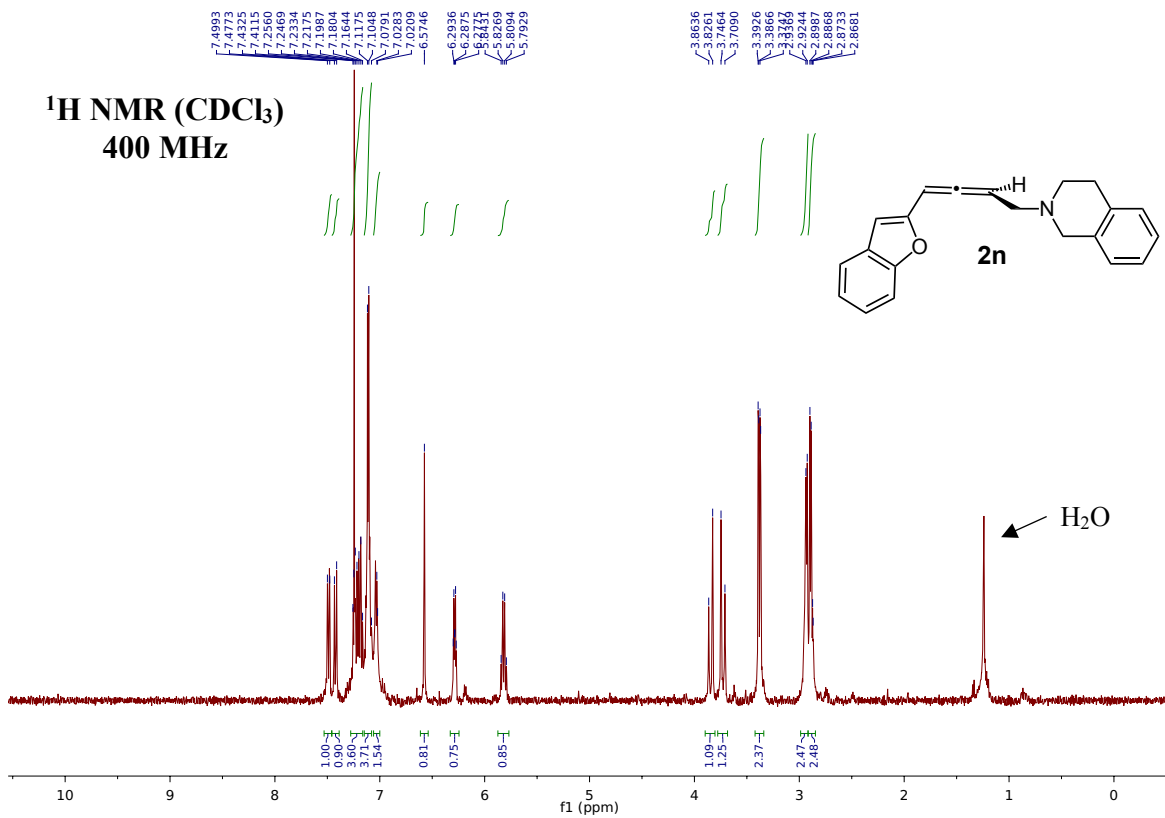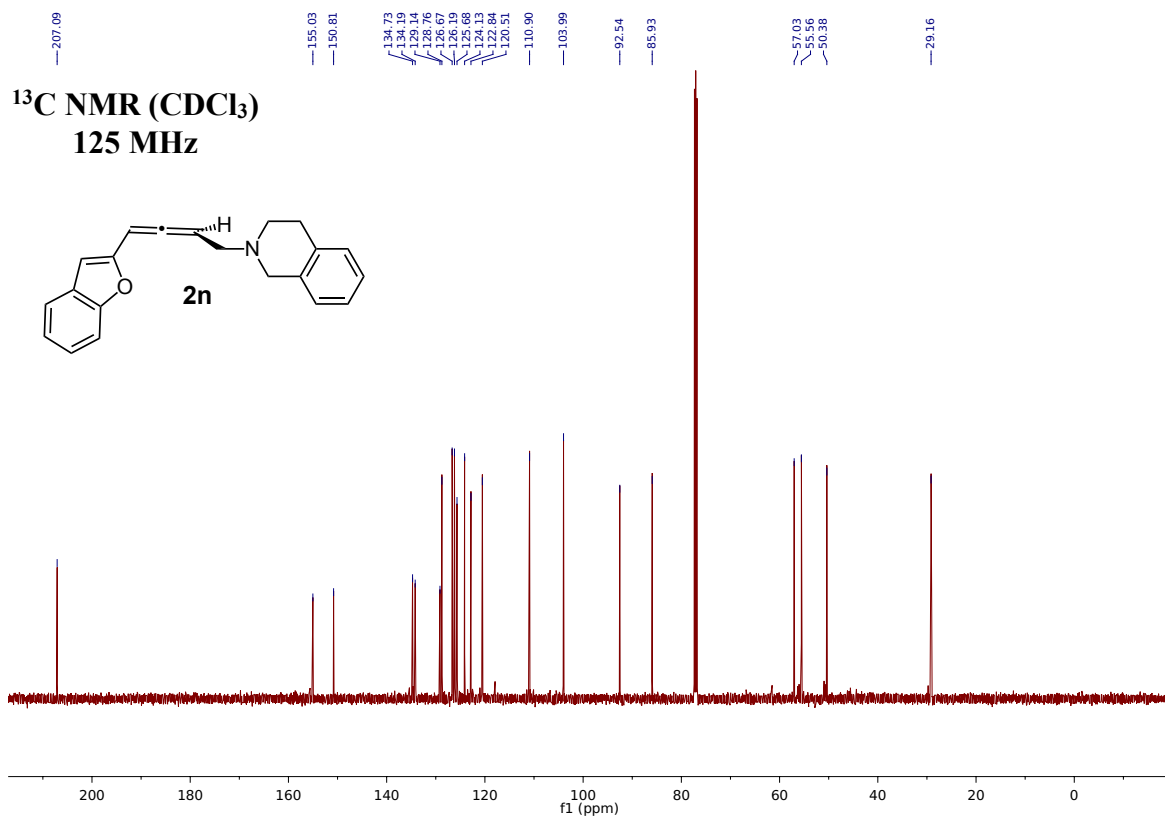

**$^1\text{H}$  NMR ( $\text{CDCl}_3$ )**  
400 MHz

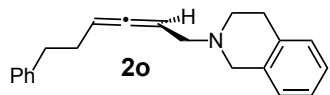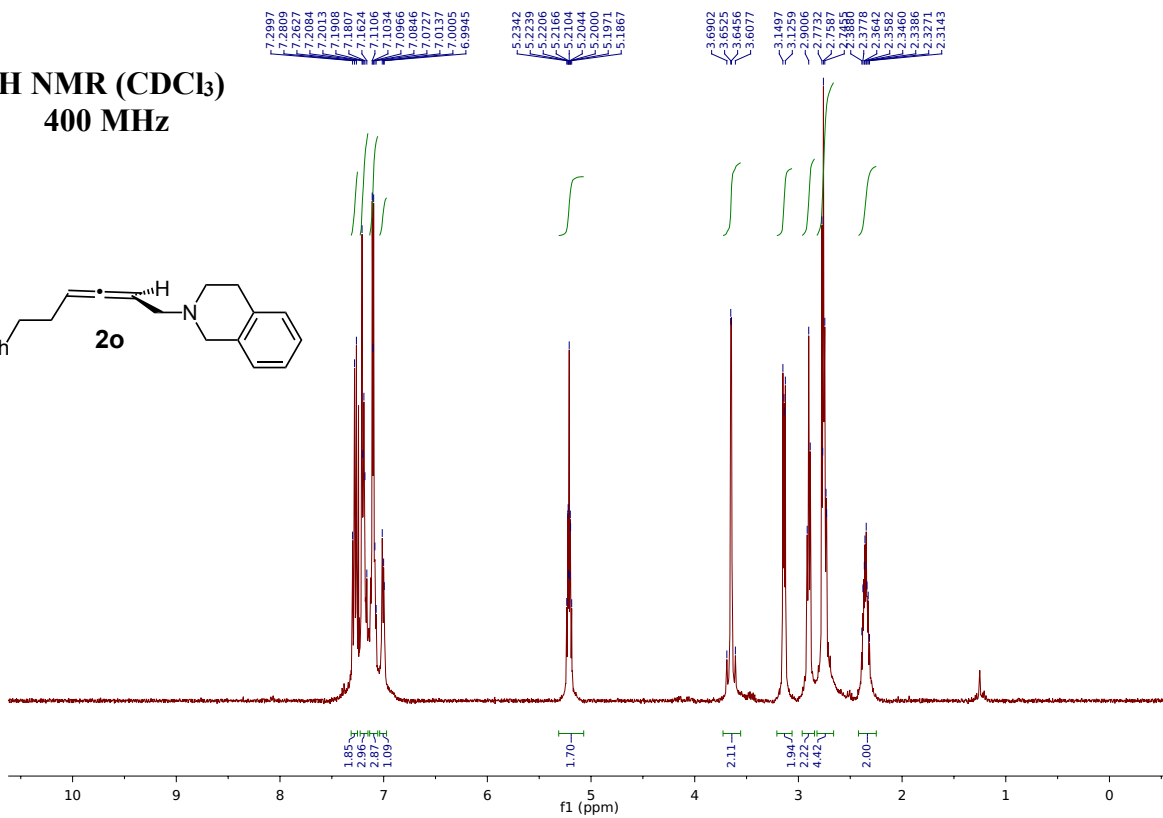

**$^{13}\text{C}$  NMR ( $\text{CDCl}_3$ )**  
125 MHz

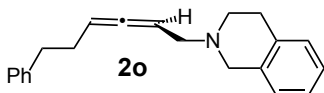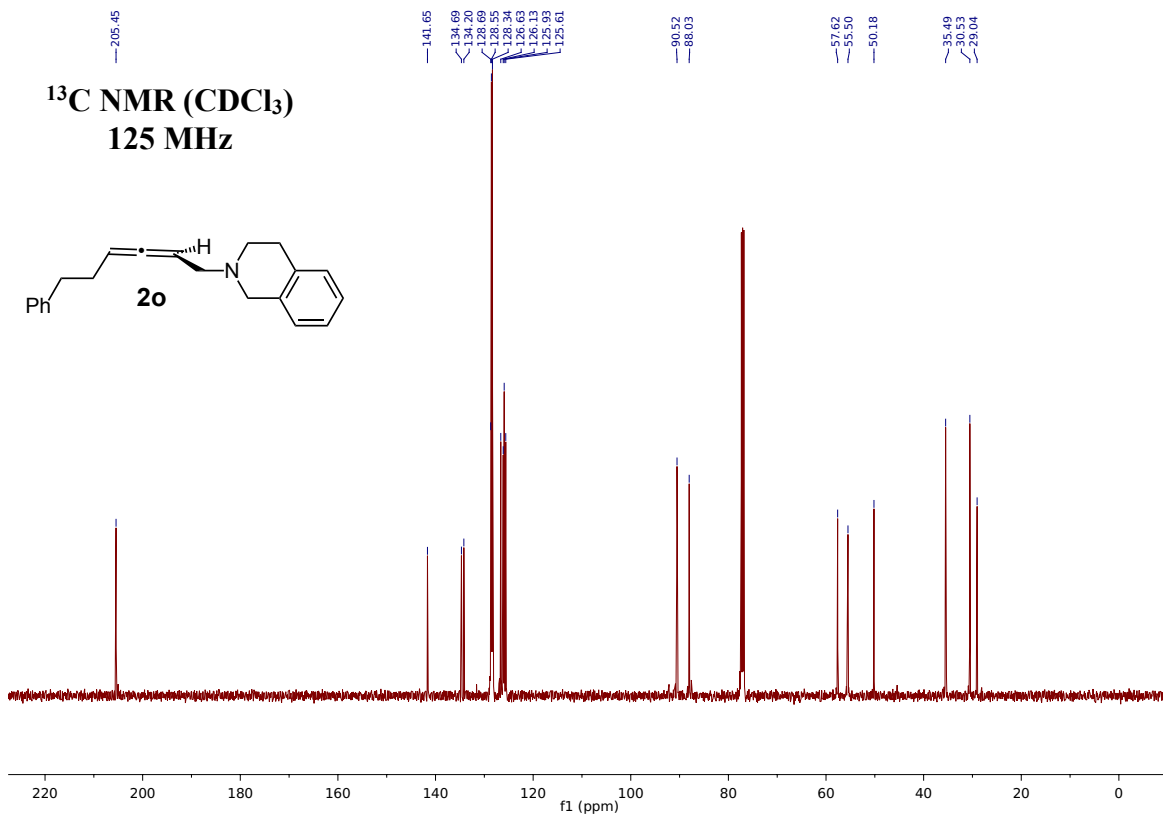

**<sup>1</sup>H NMR (CDCl<sub>3</sub>)  
400 MHz**

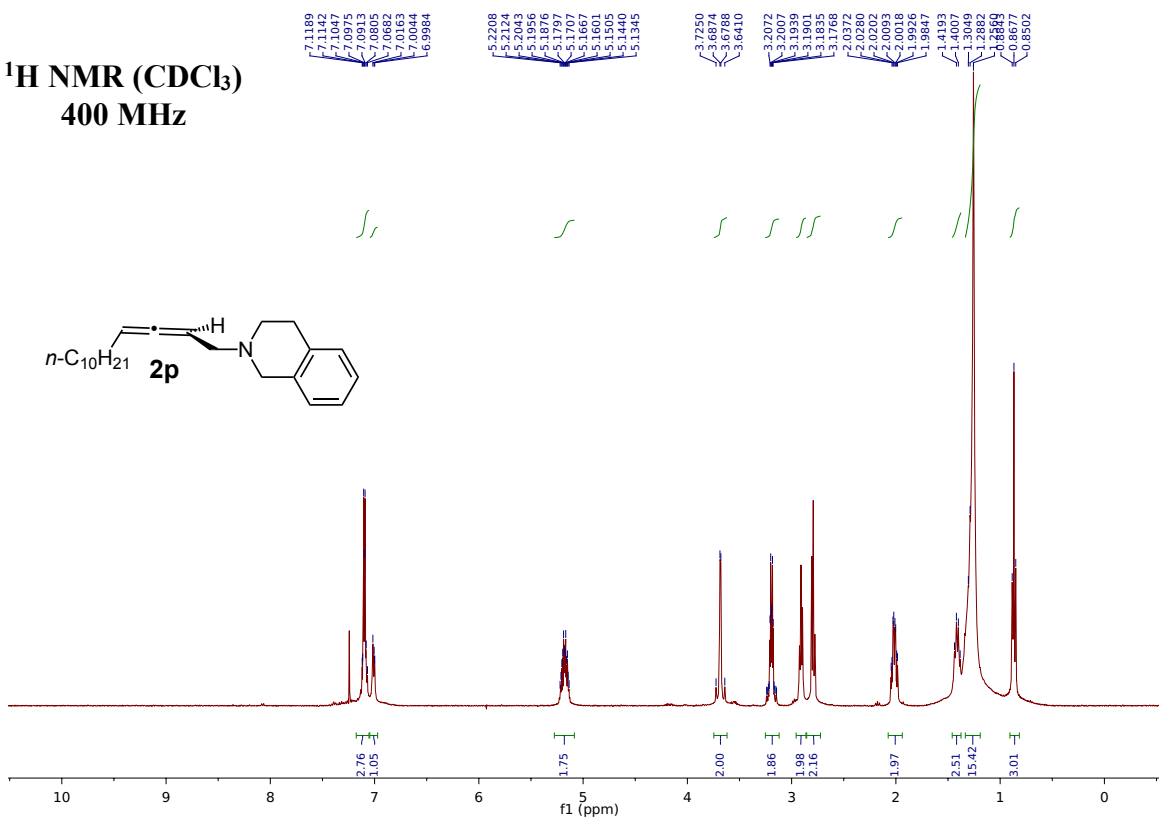

**<sup>13</sup>C NMR (CDCl<sub>3</sub>)  
125 MHz**

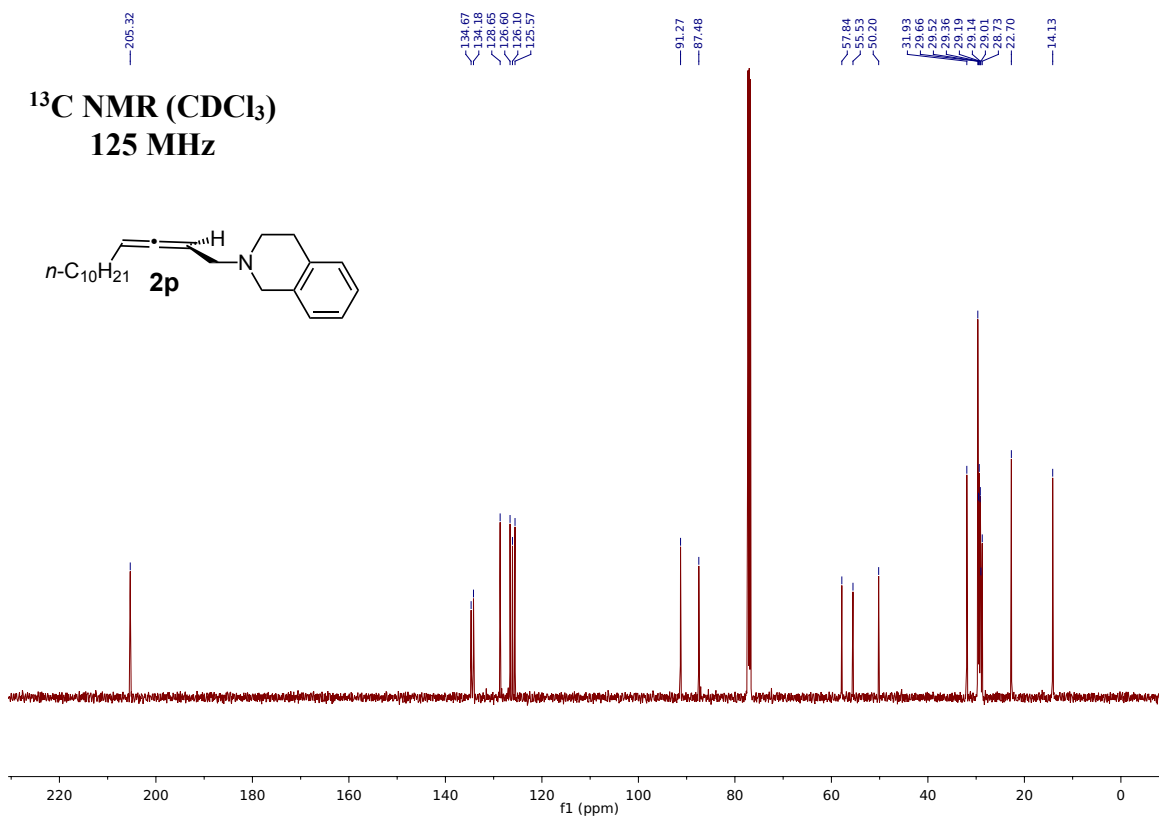

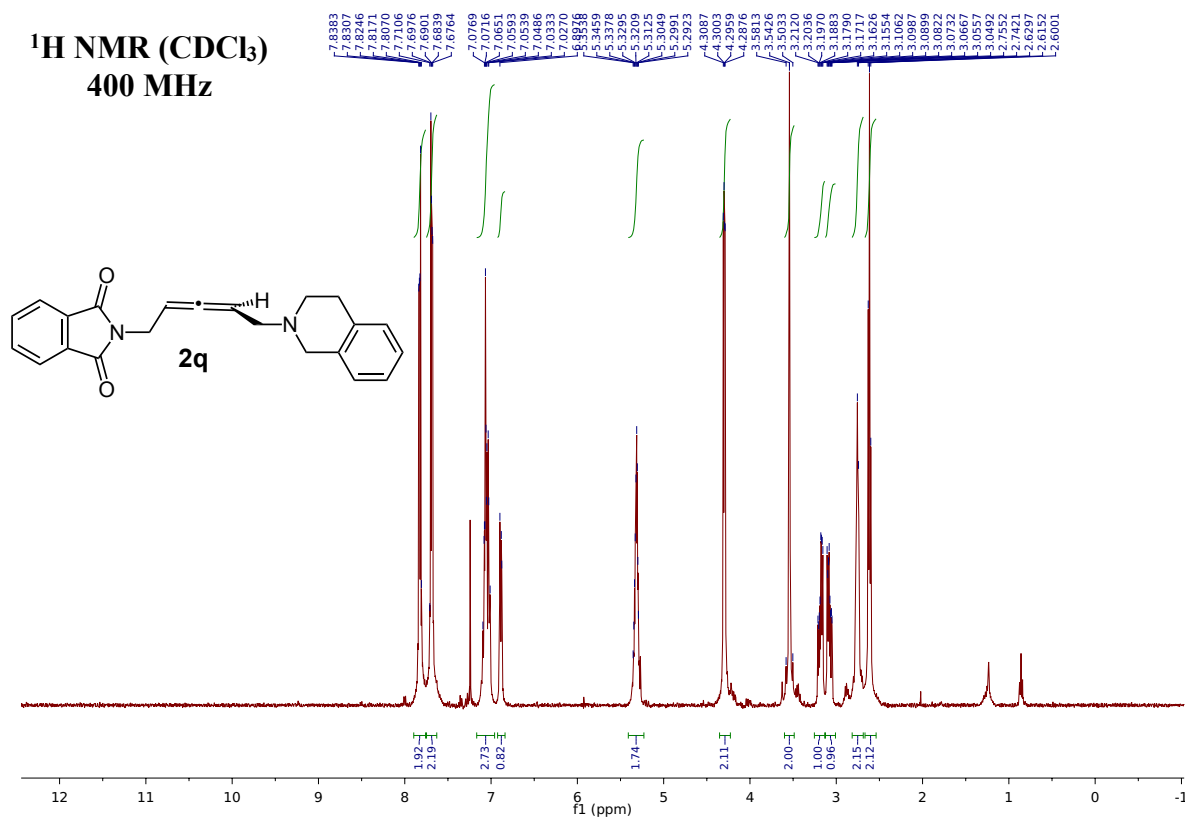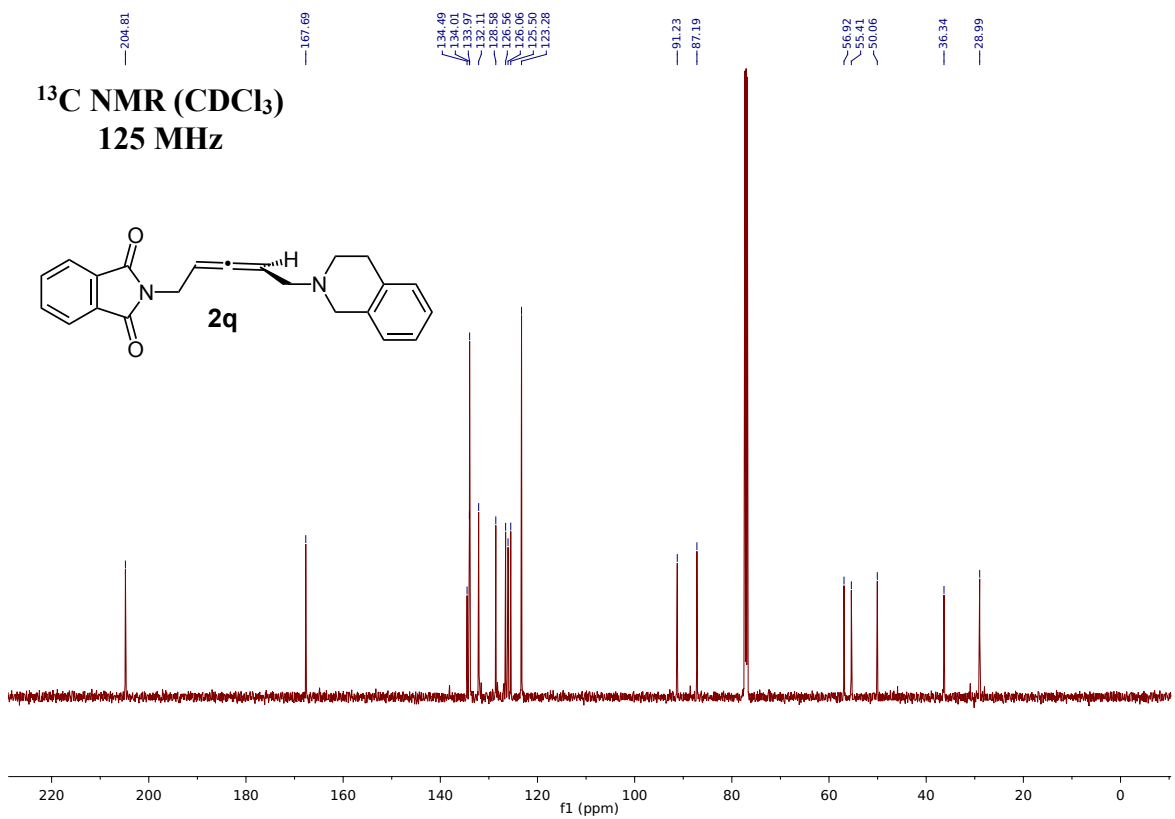

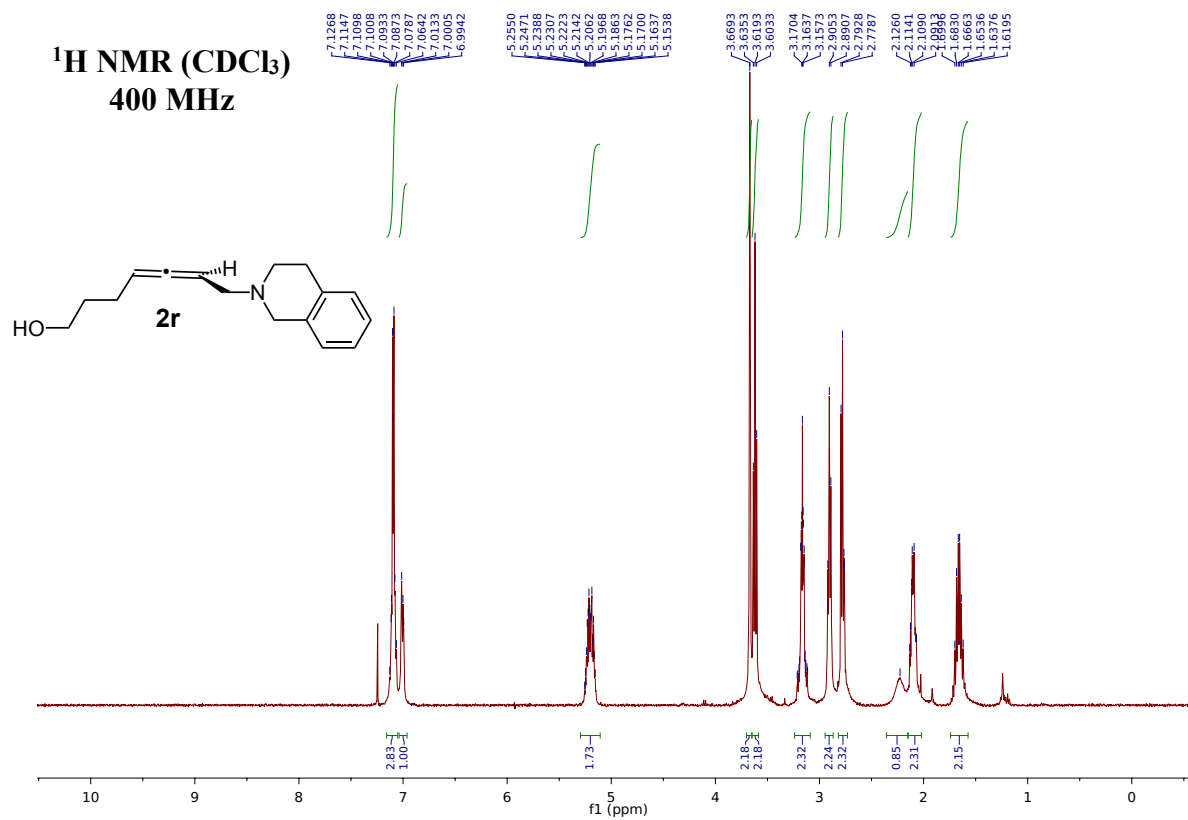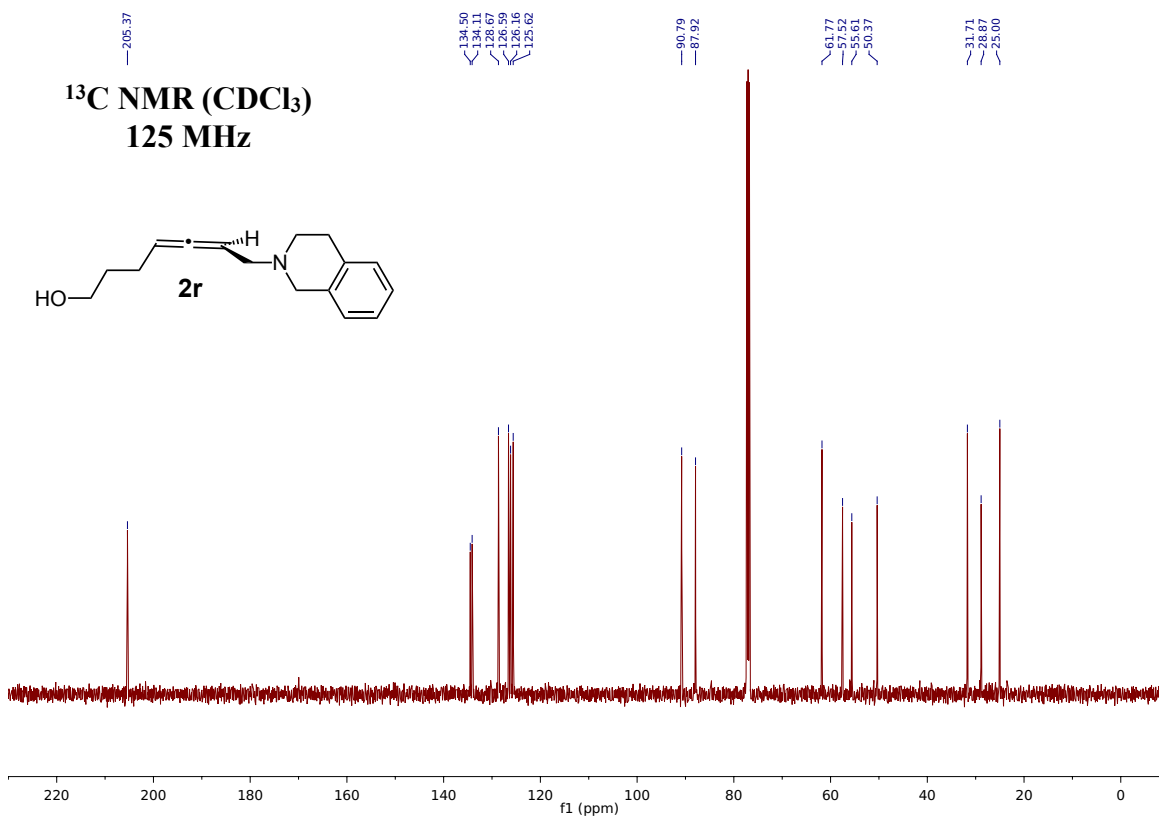

**<sup>1</sup>H NMR (CDCl<sub>3</sub>)  
400 MHz**

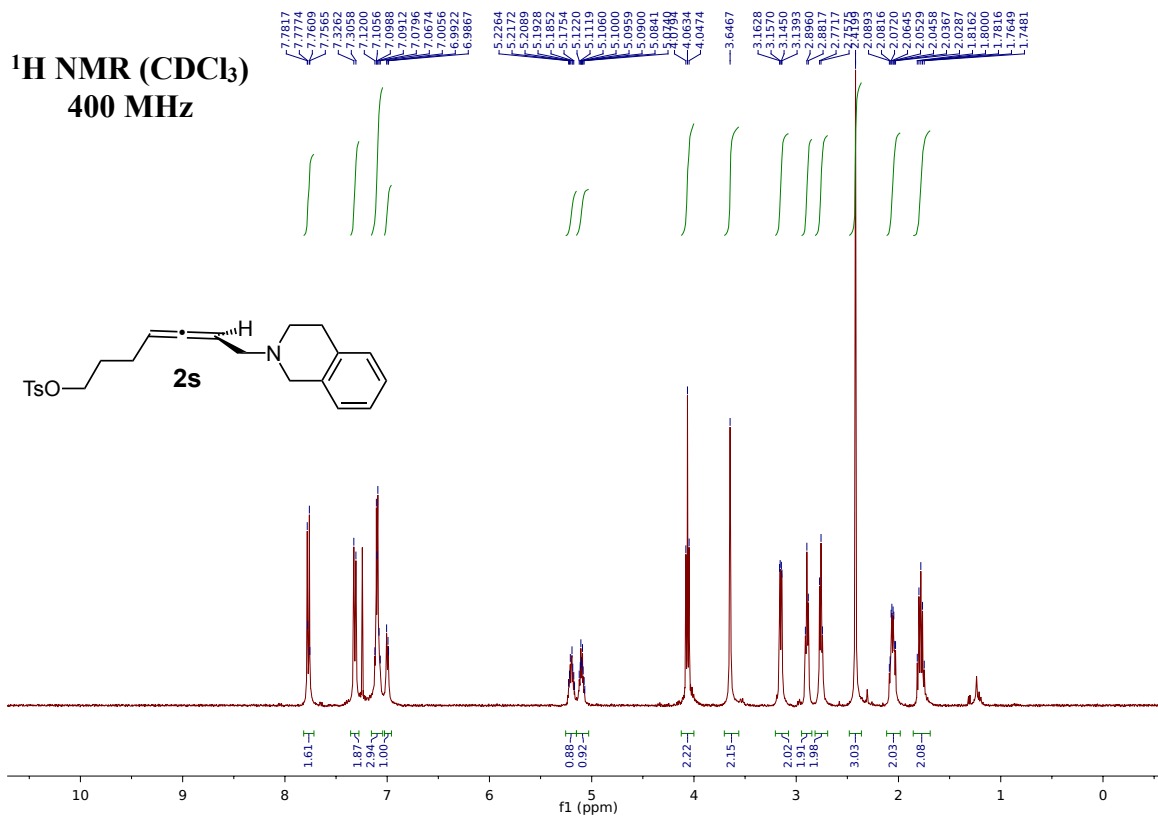

**<sup>13</sup>C NMR (CDCl<sub>3</sub>)  
125 MHz**

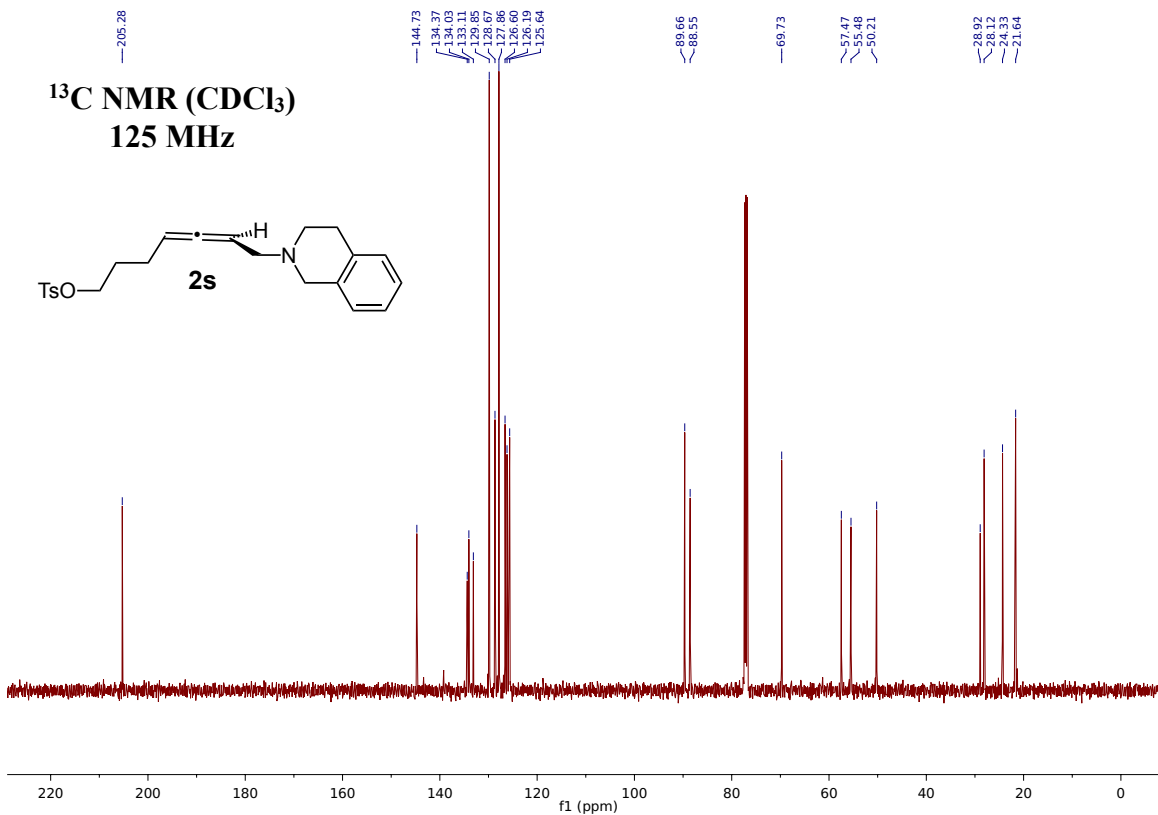

**$^1\text{H}$  NMR ( $\text{CDCl}_3$ )**  
400 MHz

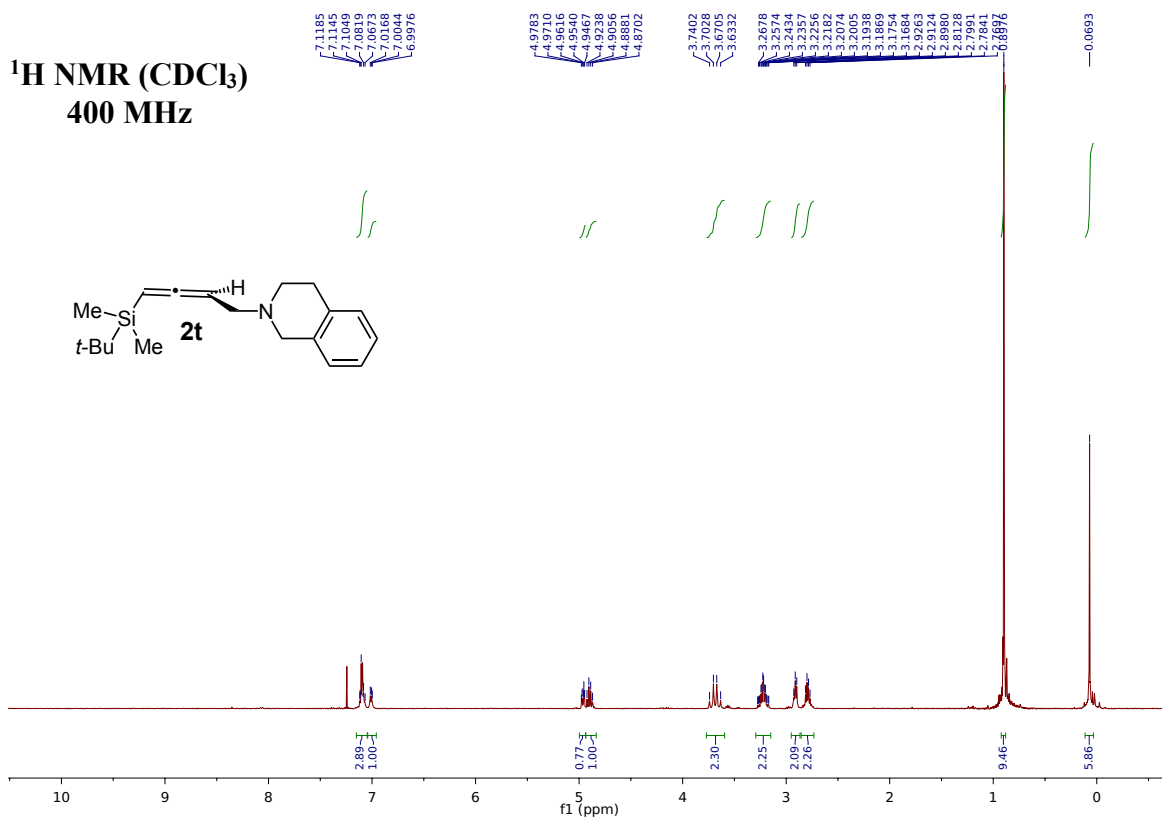

**$^{13}\text{C}$  NMR ( $\text{CDCl}_3$ )**  
125 MHz

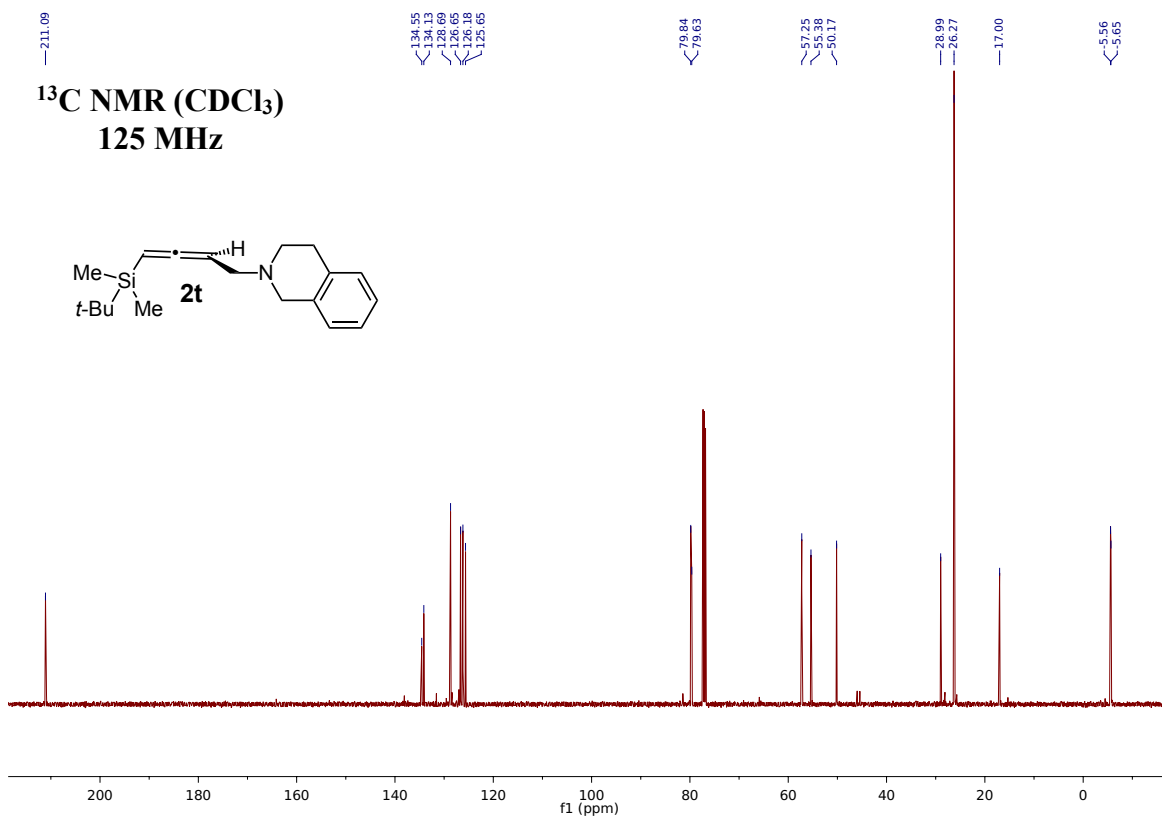



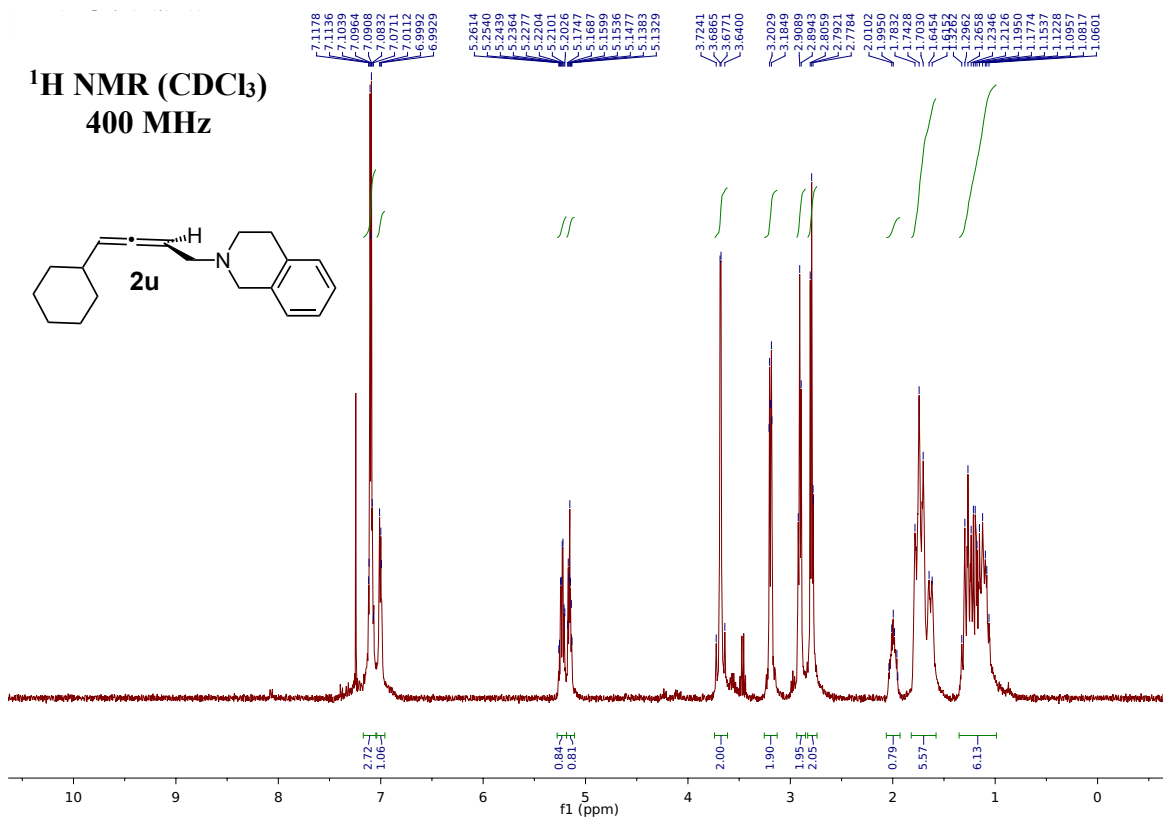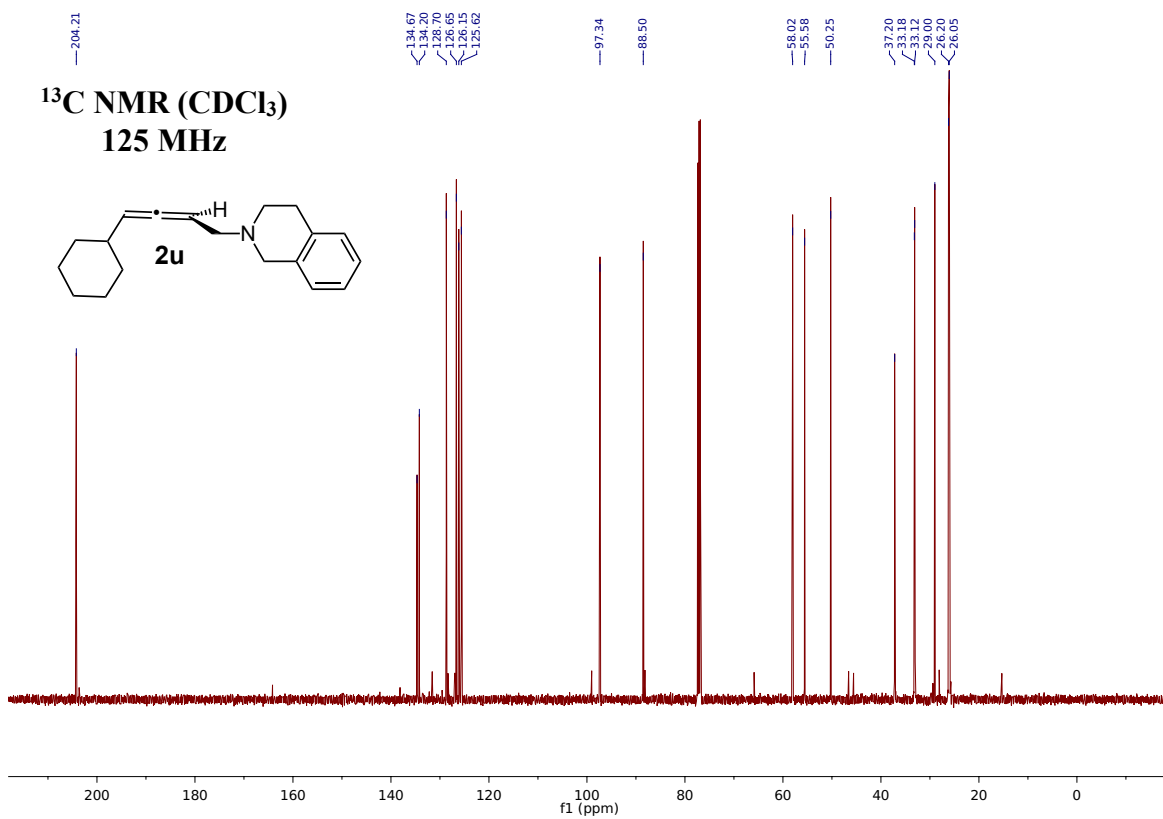

**<sup>1</sup>H NMR (CDCl<sub>3</sub>)  
500 MHz**

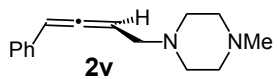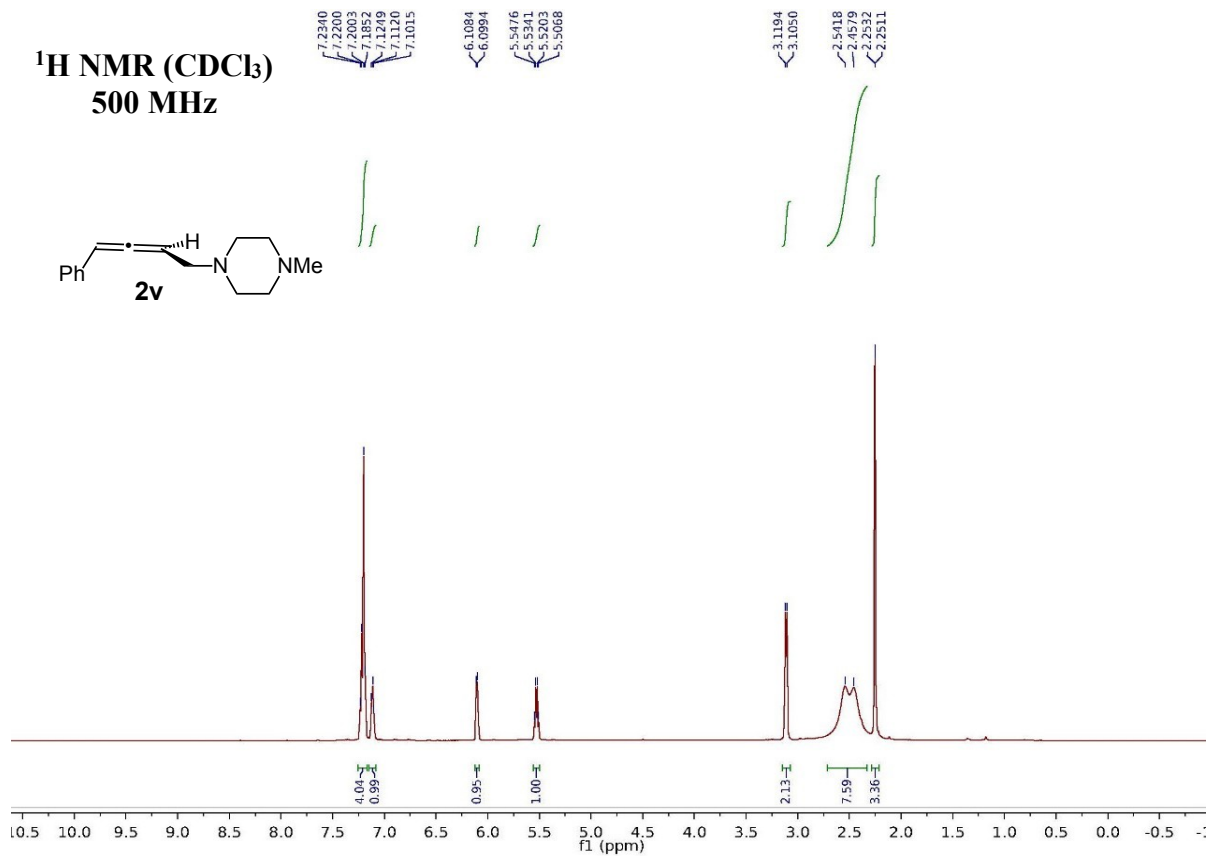

**<sup>13</sup>C NMR (CDCl<sub>3</sub>)  
125 MHz**

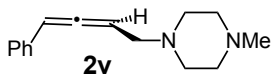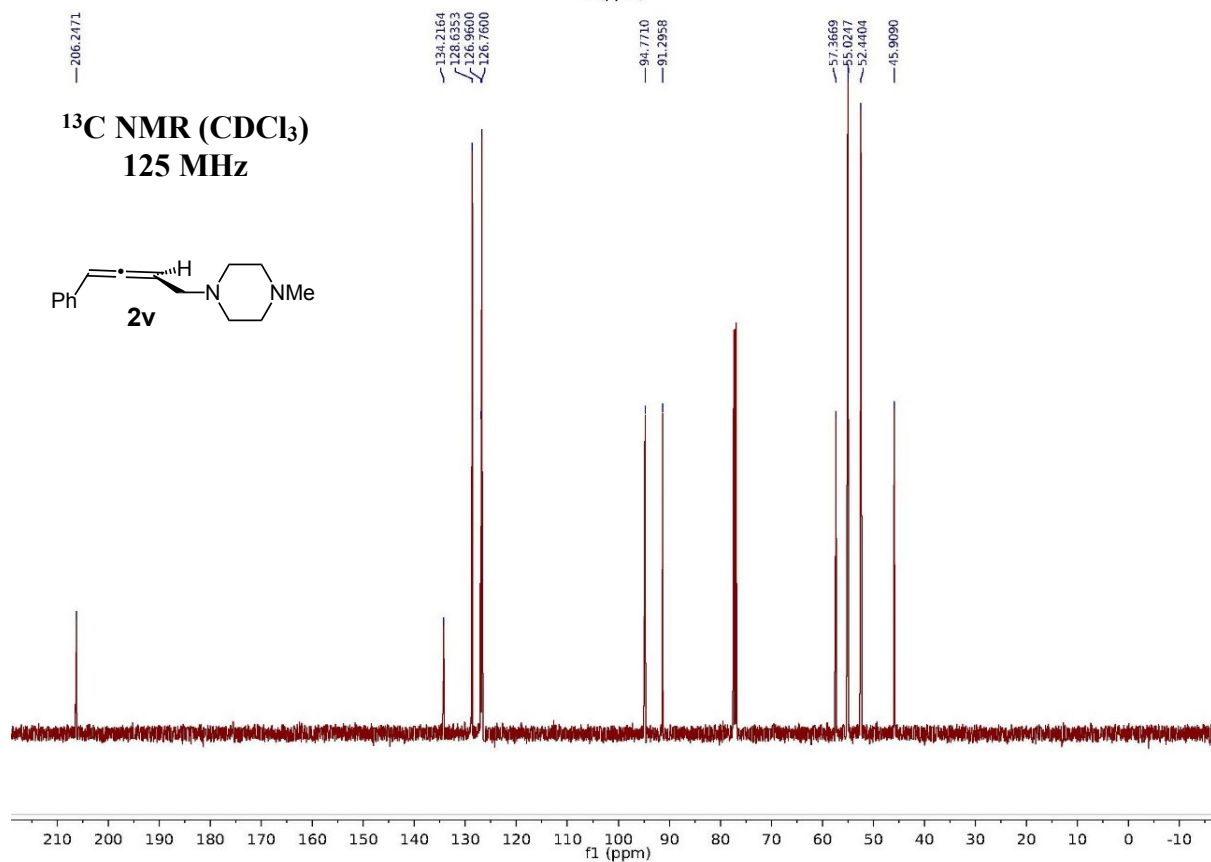

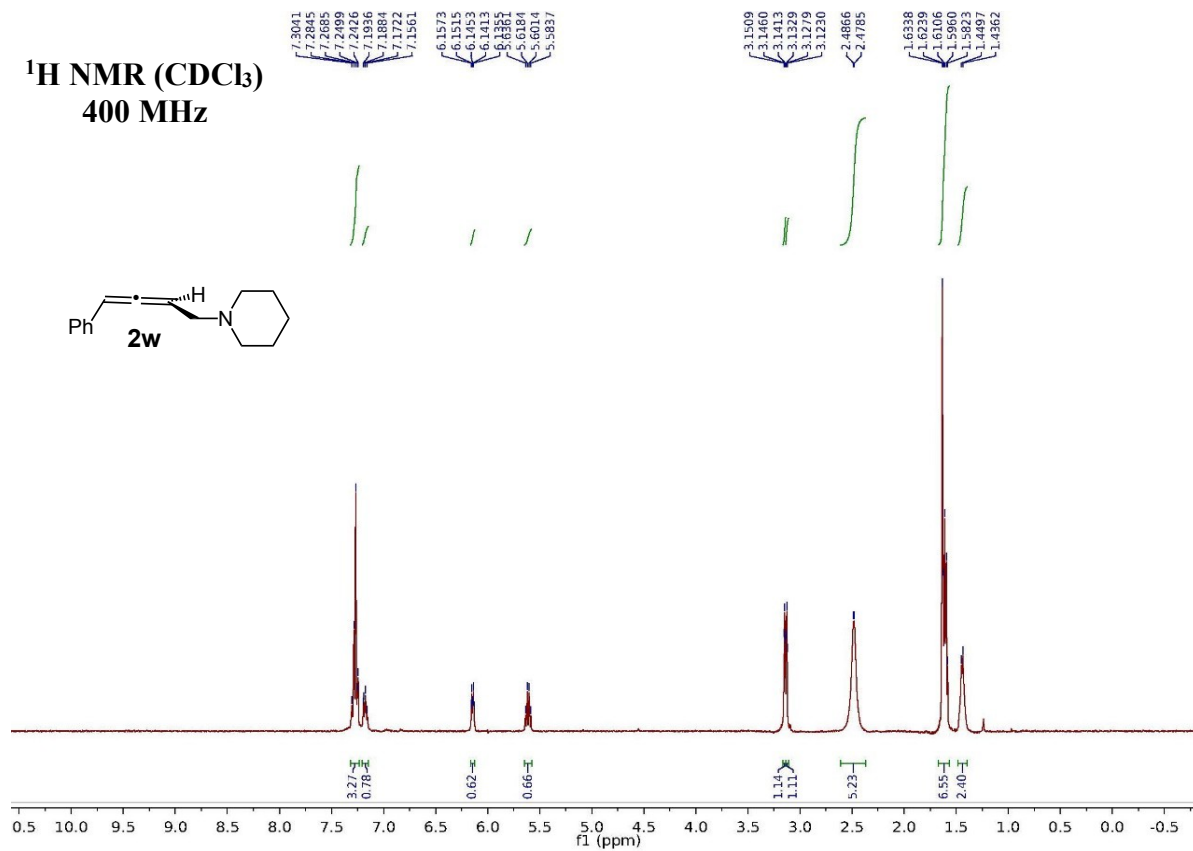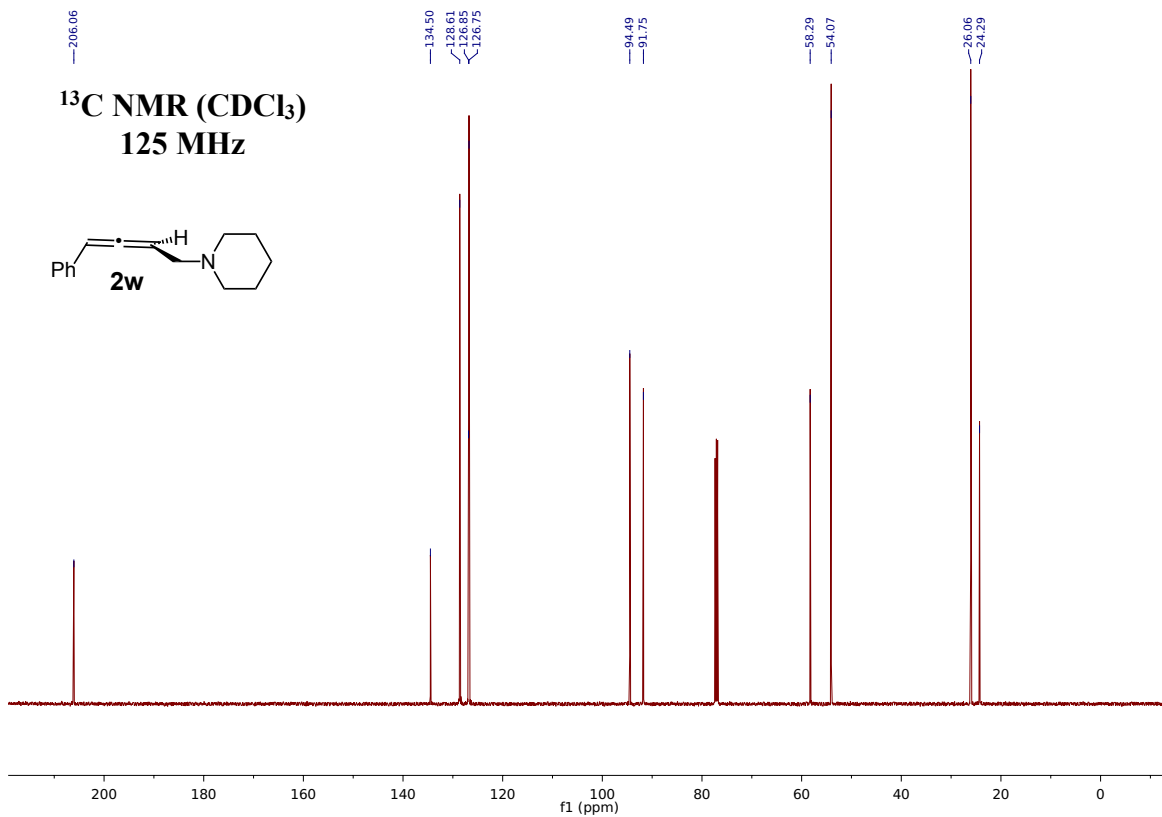

**<sup>1</sup>H NMR (CDCl<sub>3</sub>)  
400 MHz**

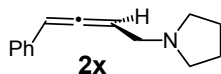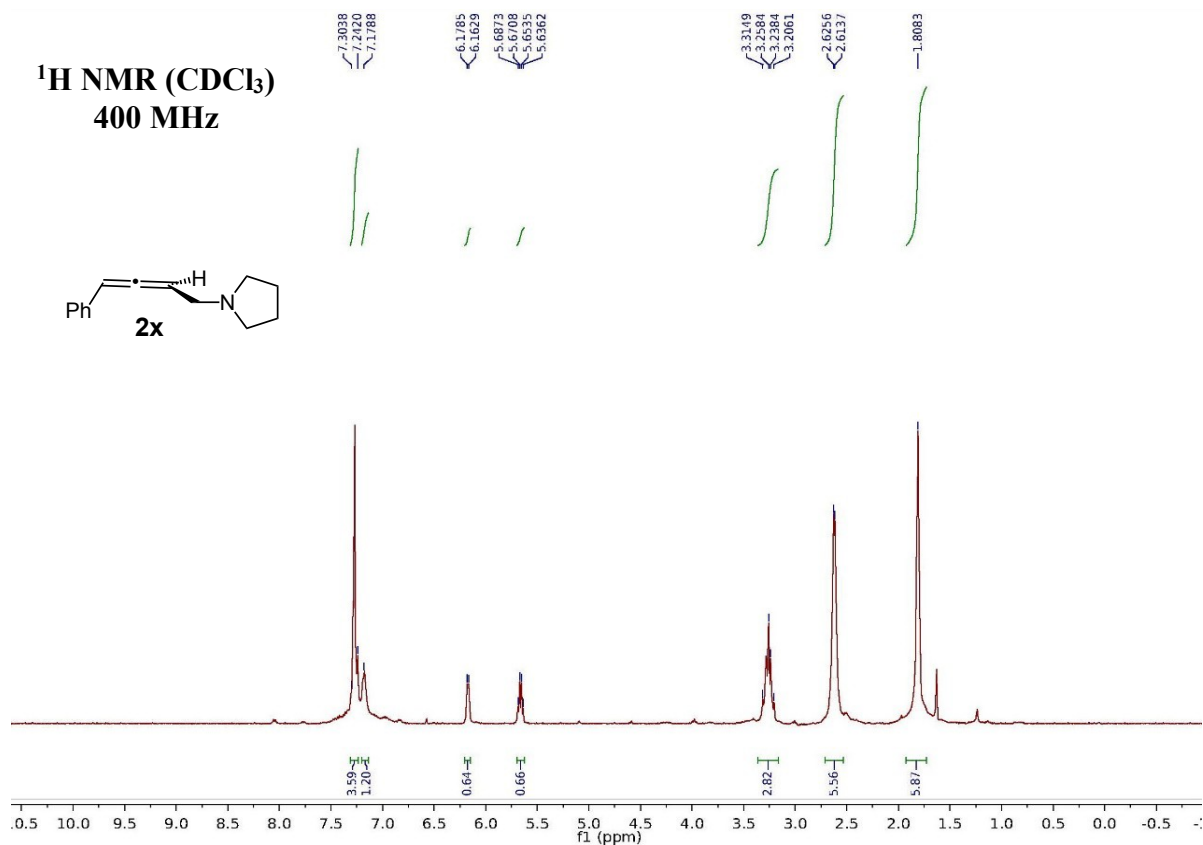

**<sup>13</sup>C NMR (CDCl<sub>3</sub>)  
125 MHz**

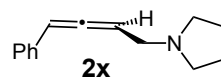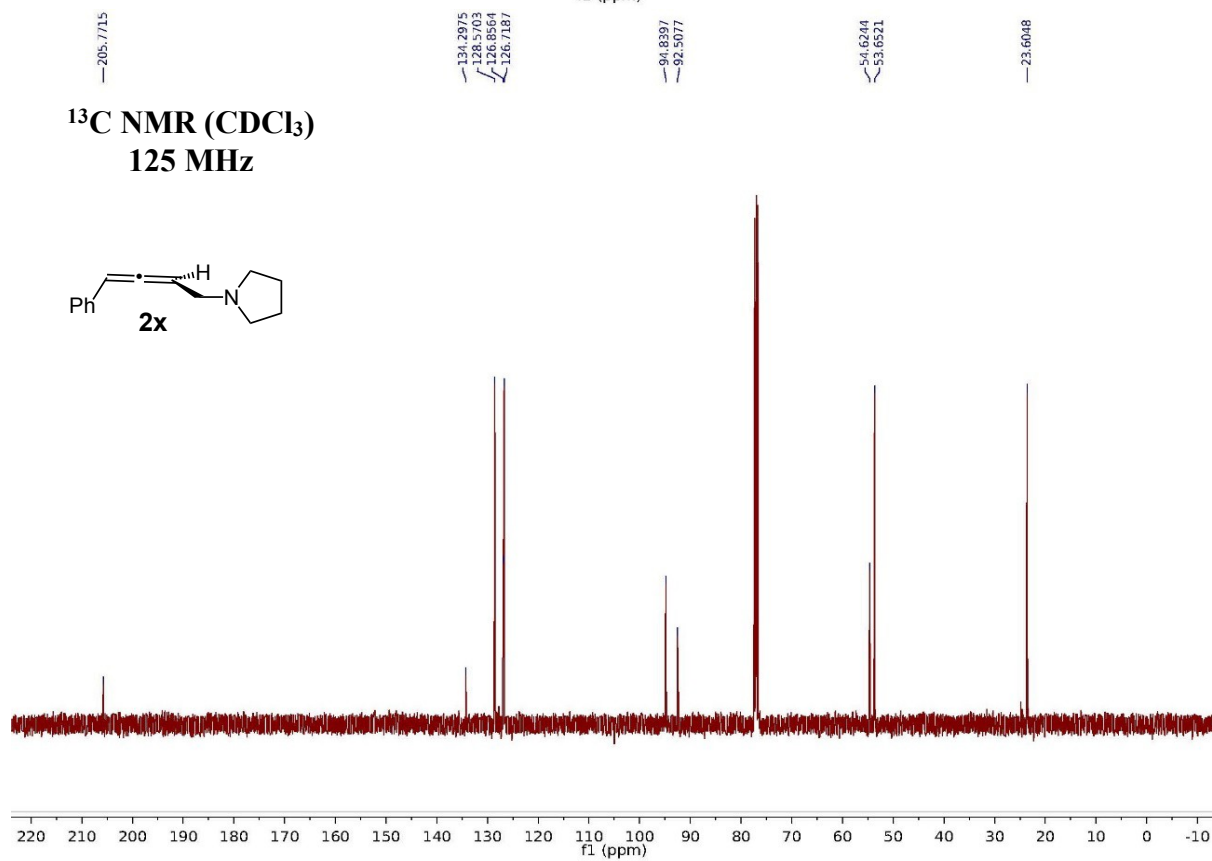

**<sup>1</sup>H NMR (CDCl<sub>3</sub>)**  
**500 MHz**

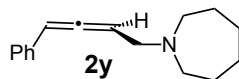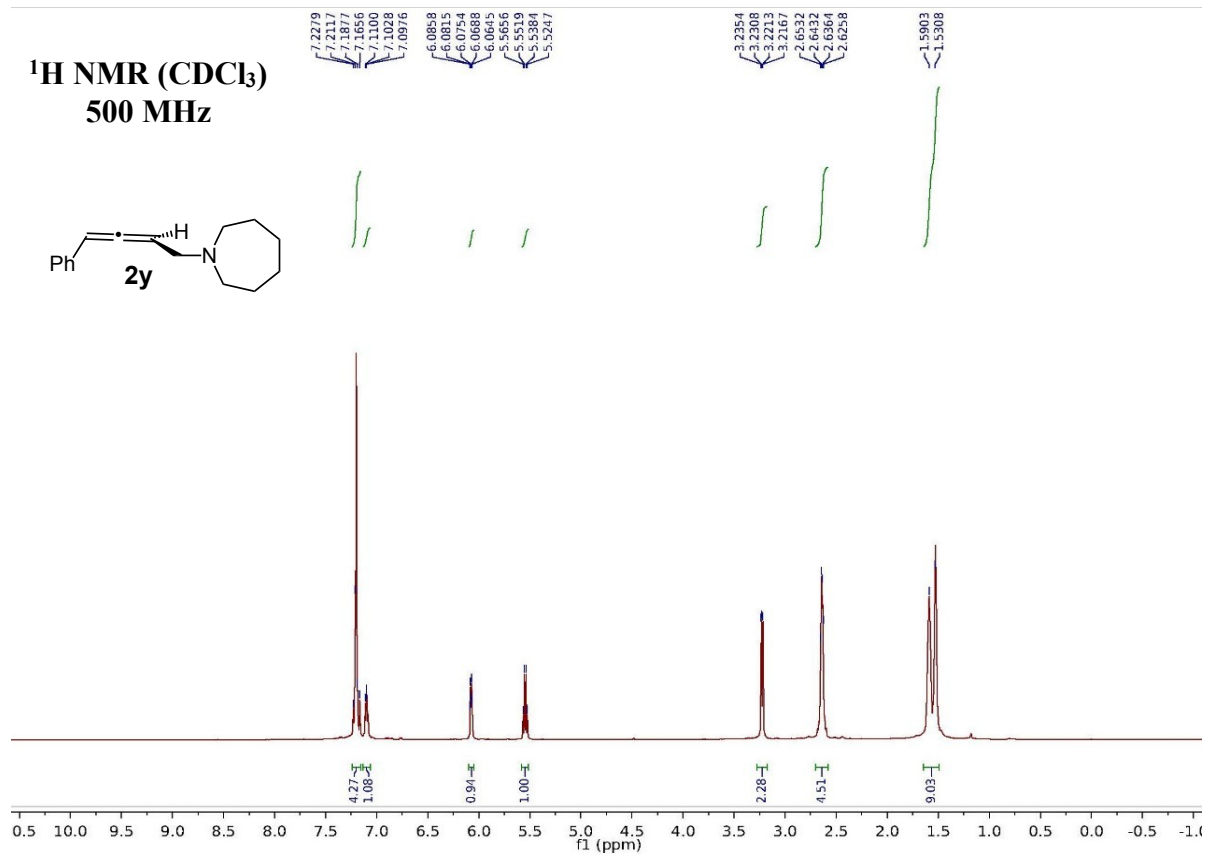

**<sup>13</sup>C NMR (CDCl<sub>3</sub>)**  
**125 MHz**

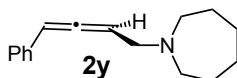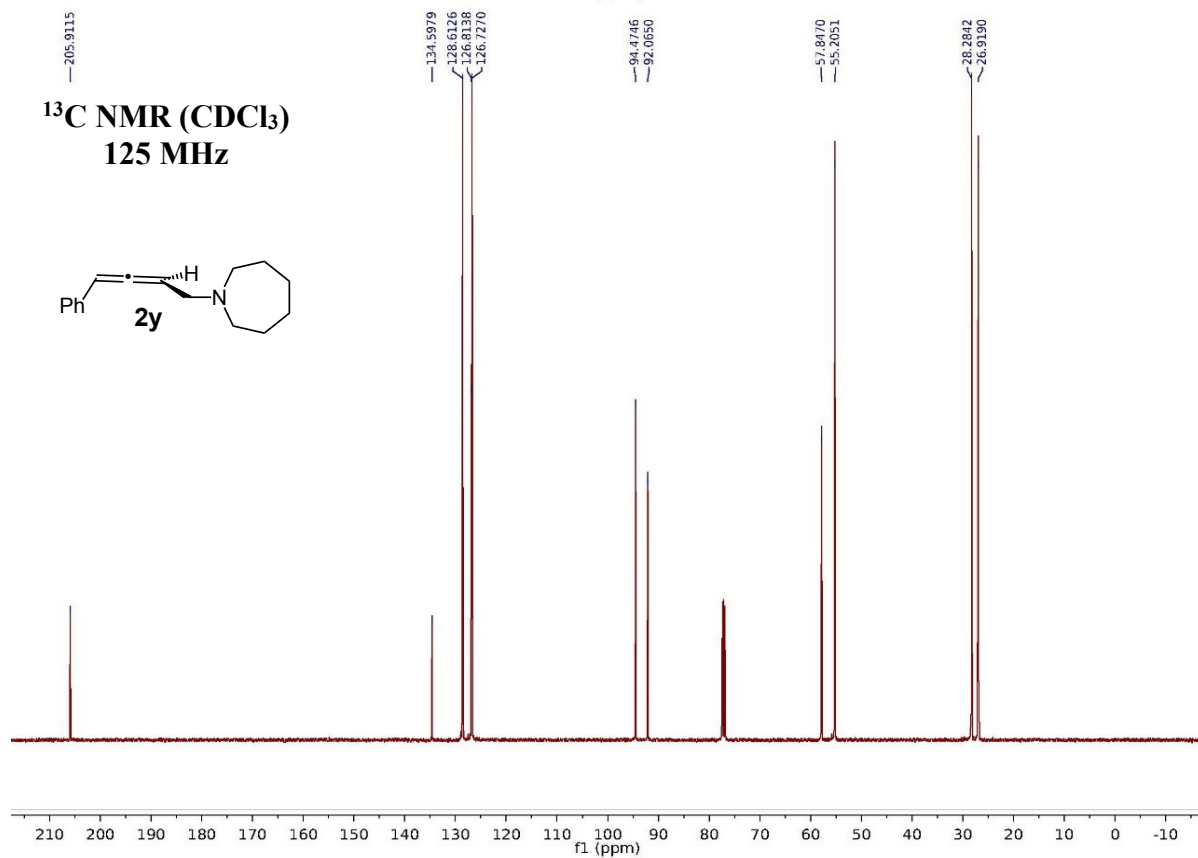

**<sup>1</sup>H NMR (CDCl<sub>3</sub>)  
400 MHz**

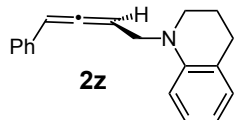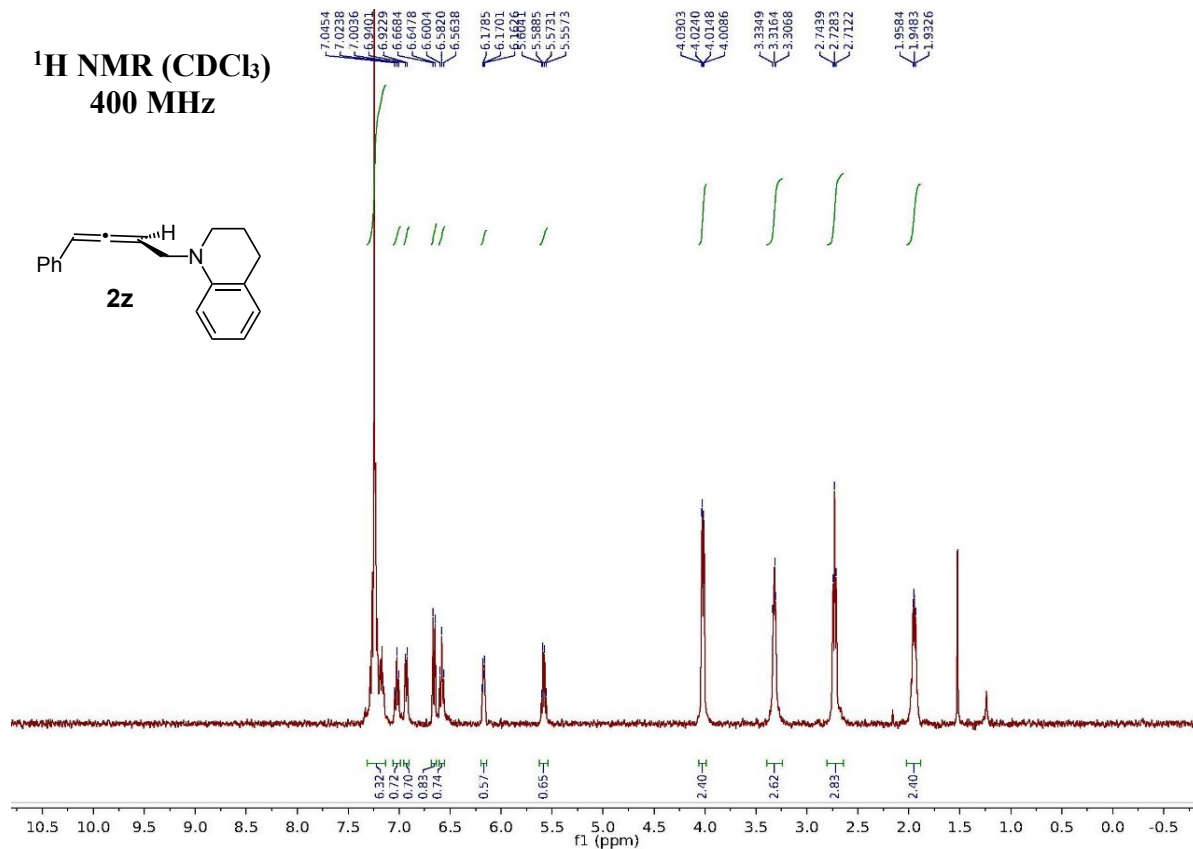

**<sup>13</sup>C NMR (CDCl<sub>3</sub>)  
125 MHz**

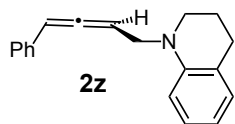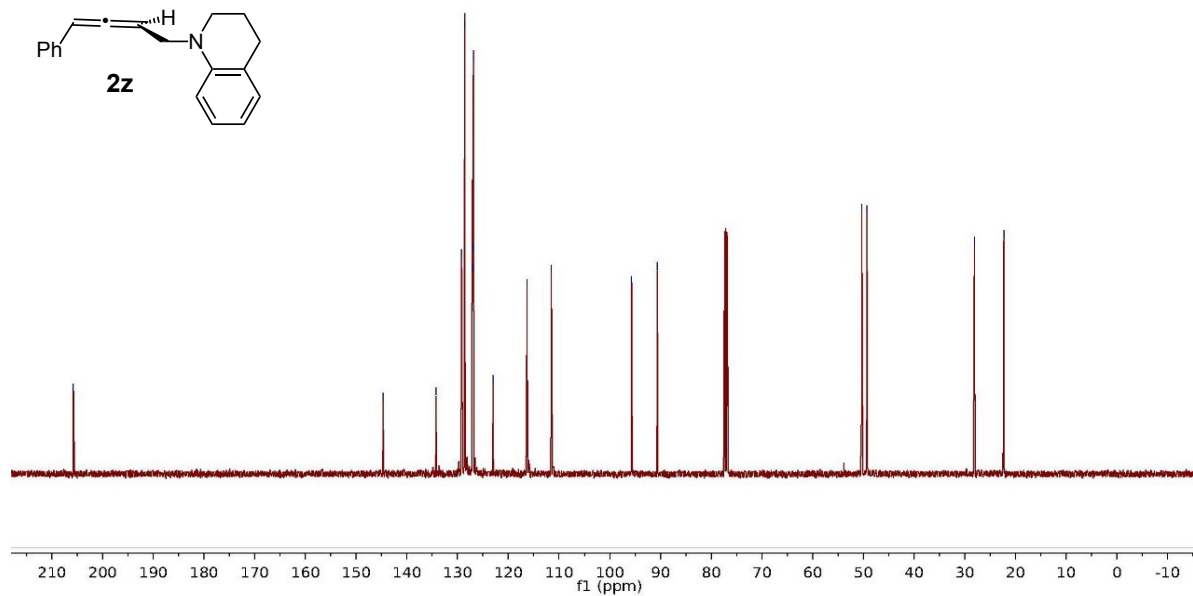

**<sup>1</sup>H NMR (CDCl<sub>3</sub>)  
400 MHz**

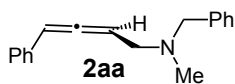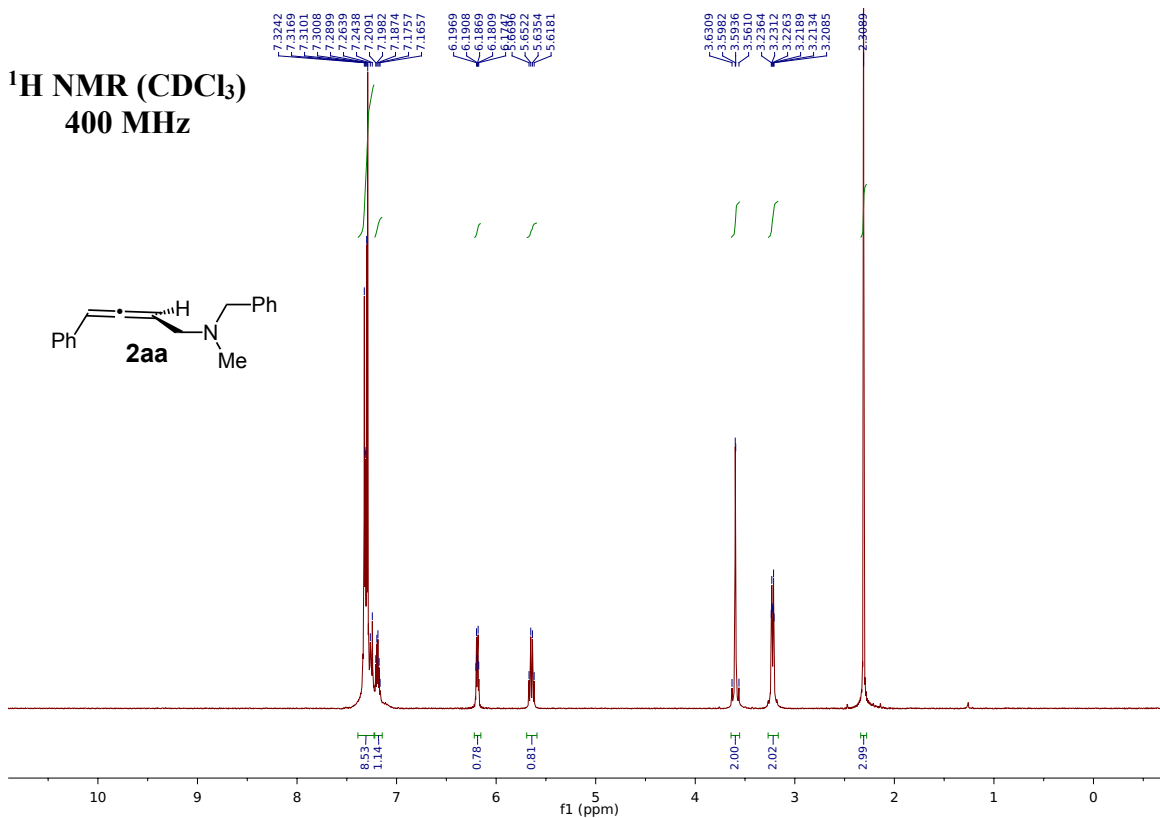

**<sup>13</sup>C NMR (CDCl<sub>3</sub>)  
125 MHz**

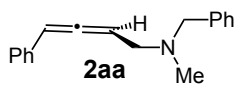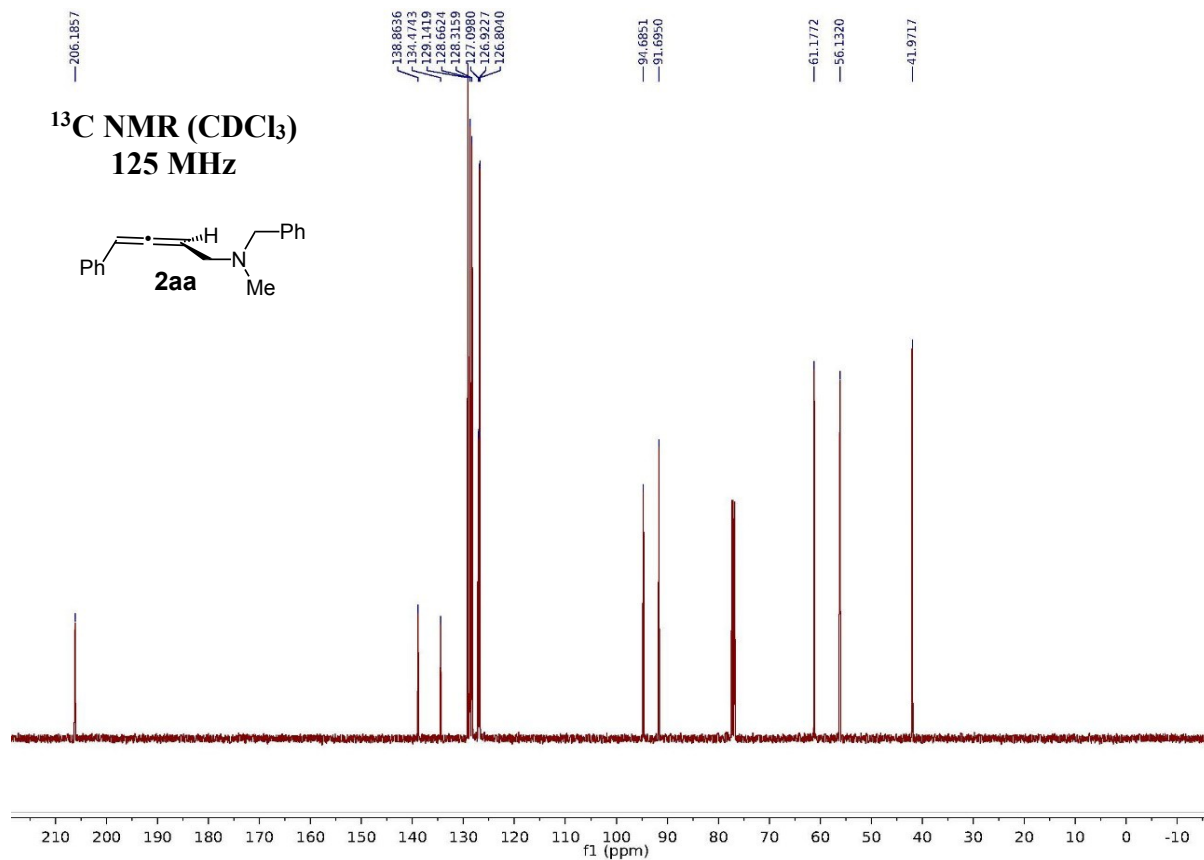

**$^1\text{H}$  NMR (CDCl<sub>3</sub>)  
500 MHz**

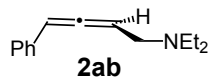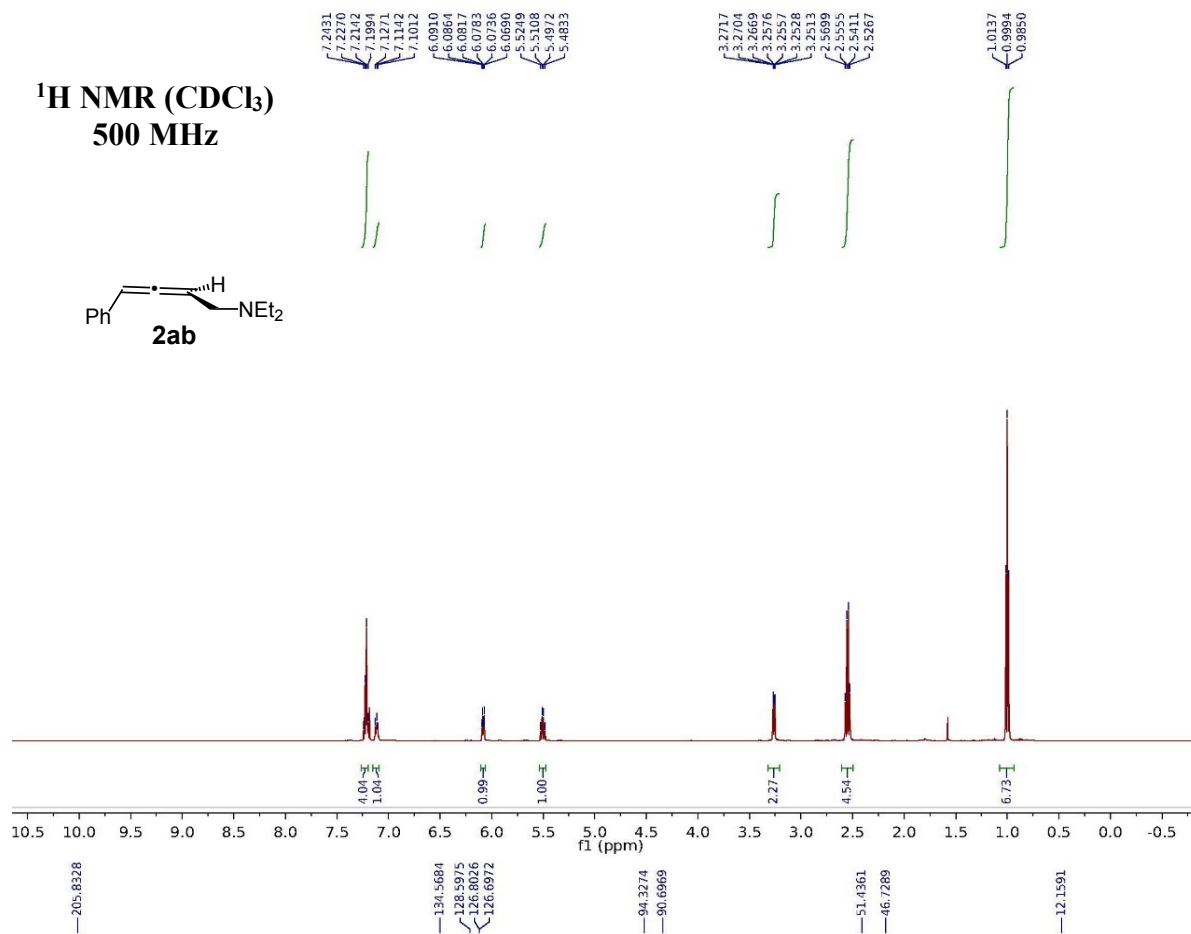

**$^{13}\text{C}$  NMR (CDCl<sub>3</sub>)  
125 MHz**

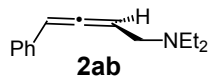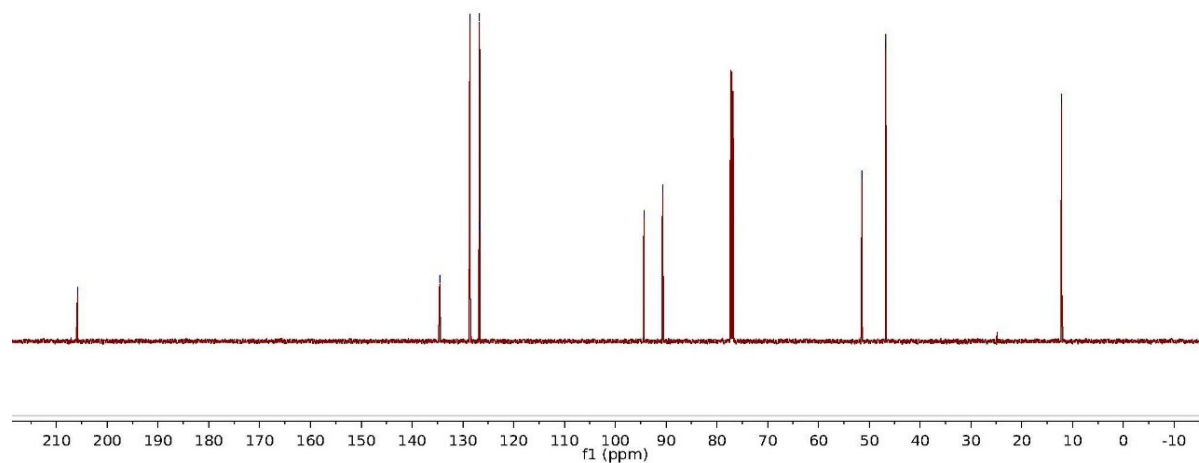



**$^1\text{H}$  NMR ( $\text{CDCl}_3$ )  
500 MHz**

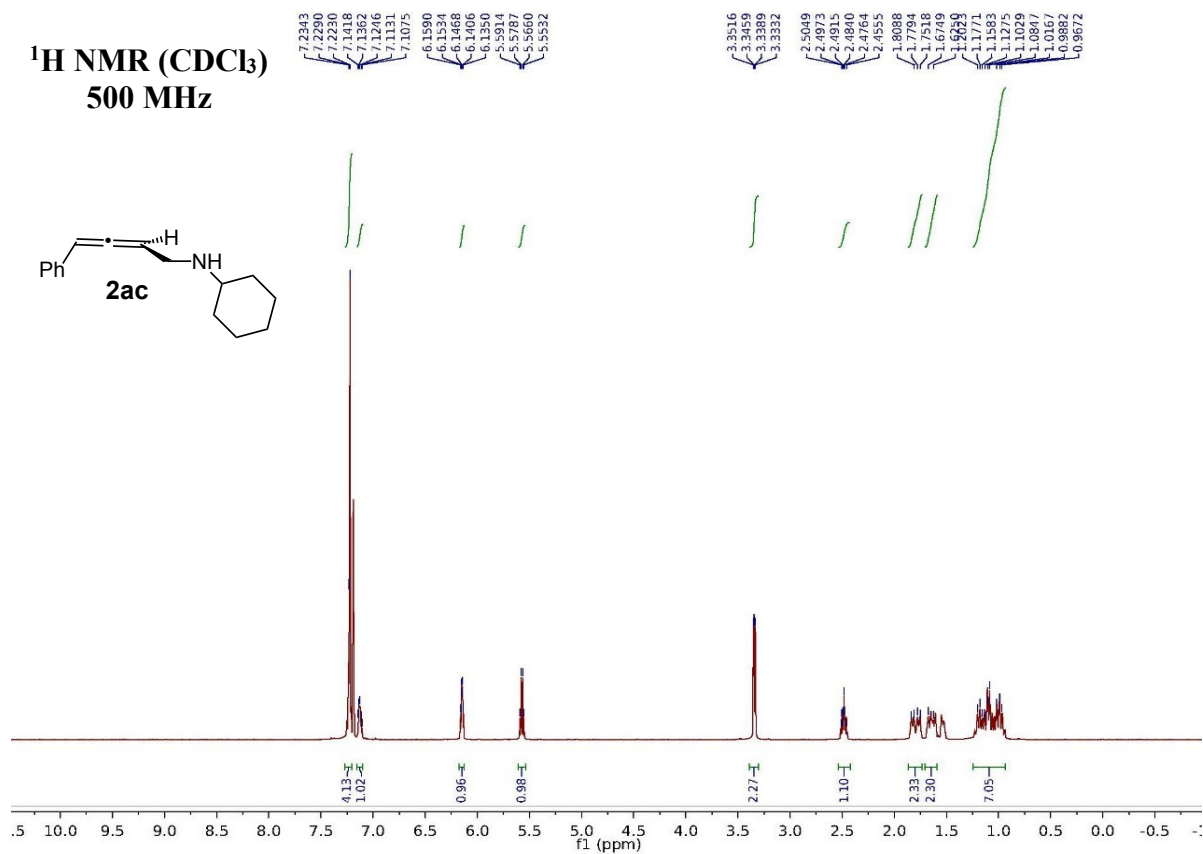

**$^{13}\text{C}$  NMR ( $\text{CDCl}_3$ )  
125 MHz**

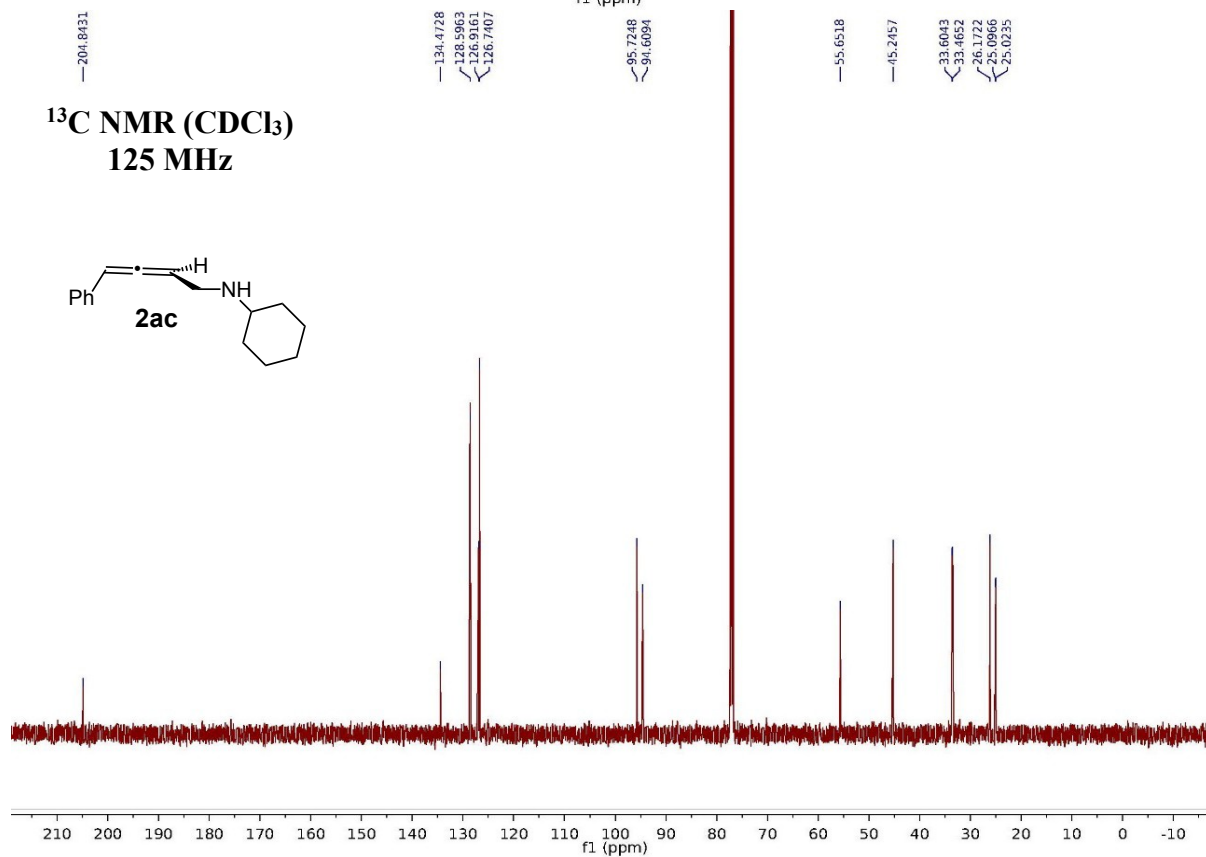

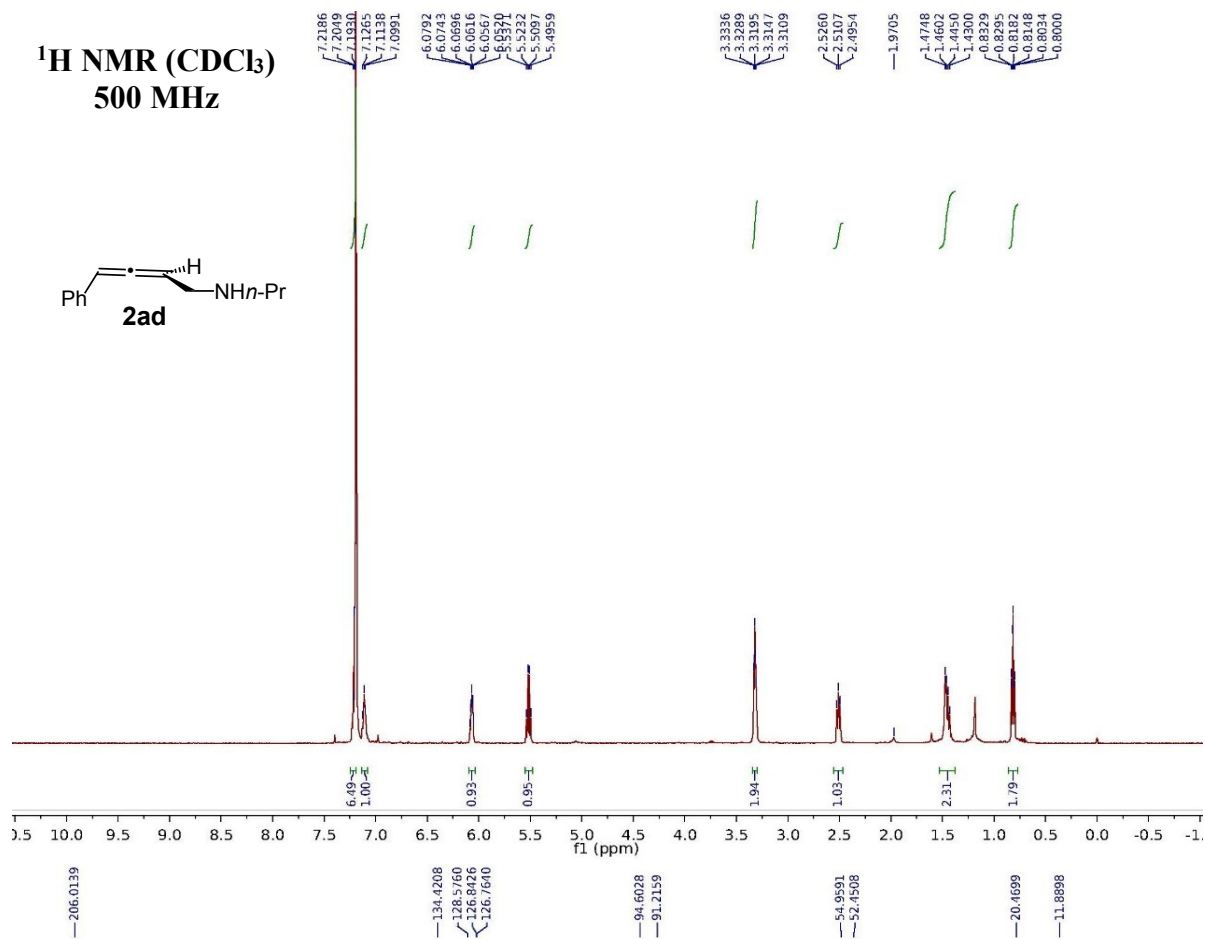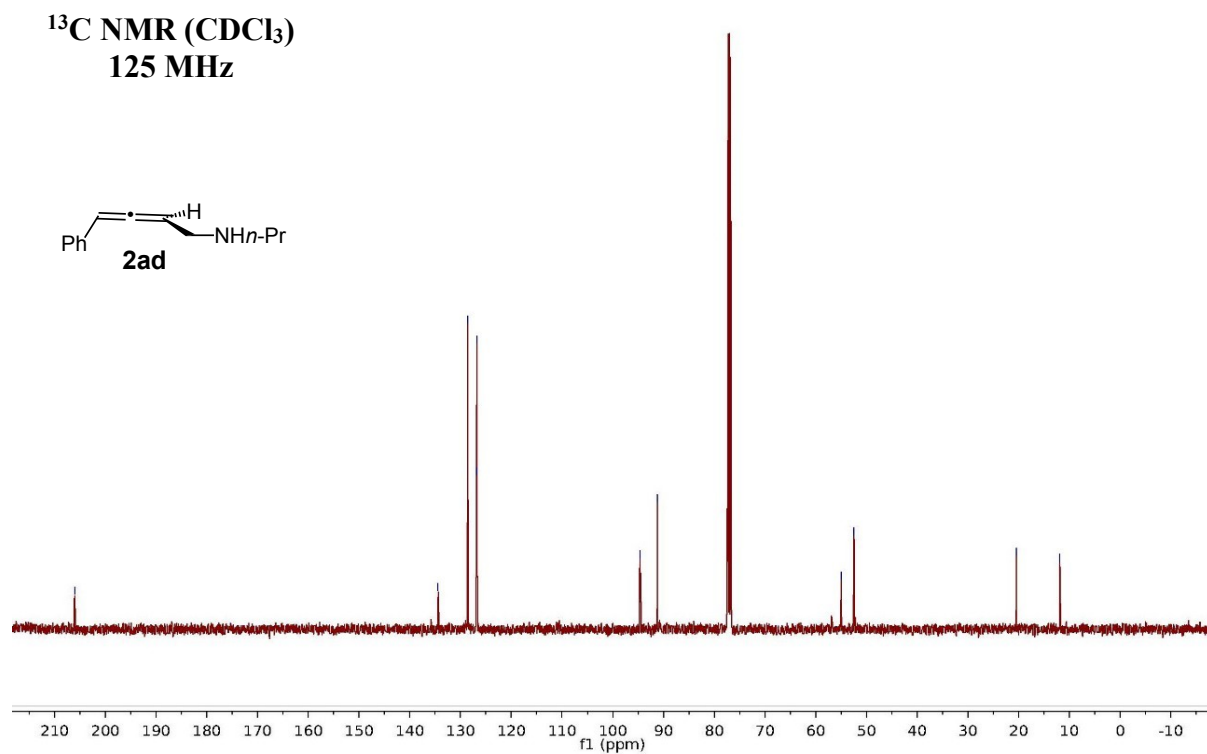

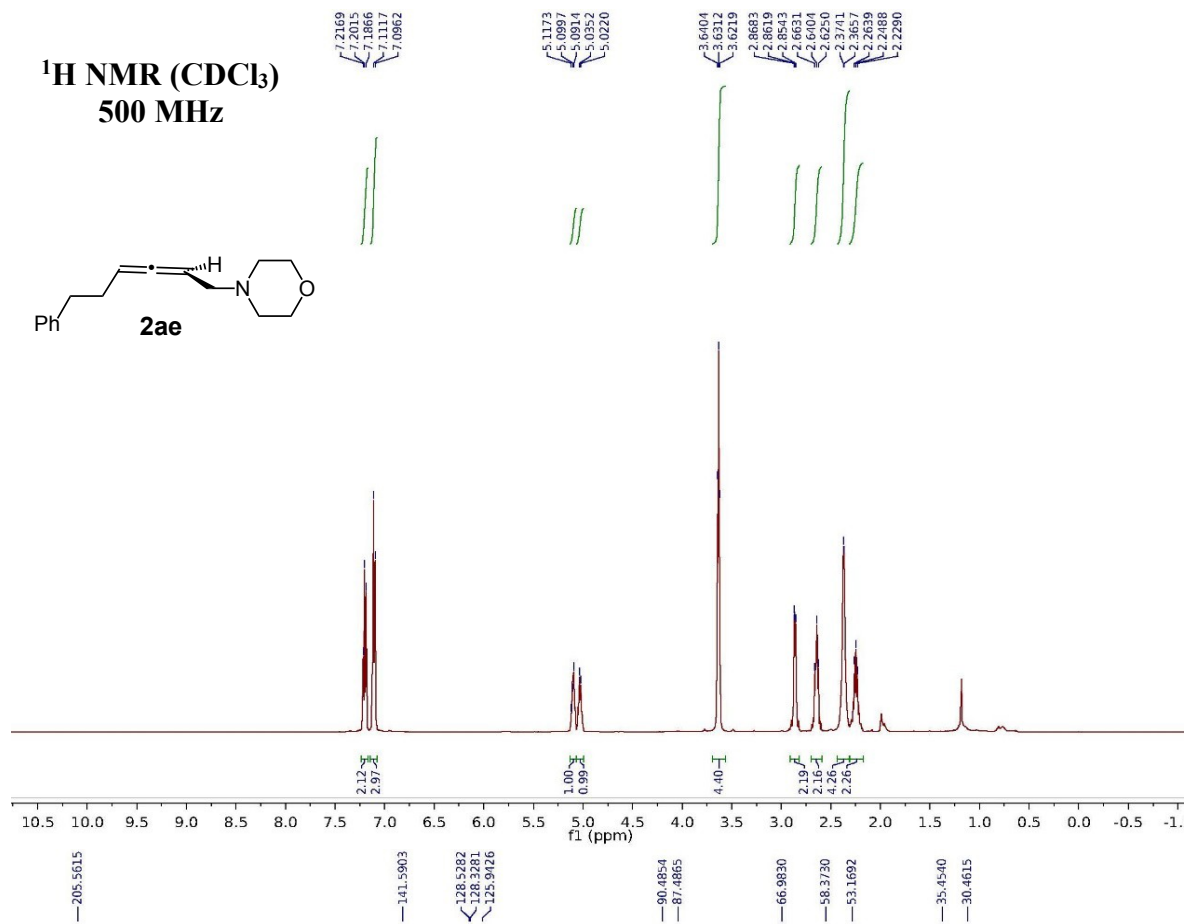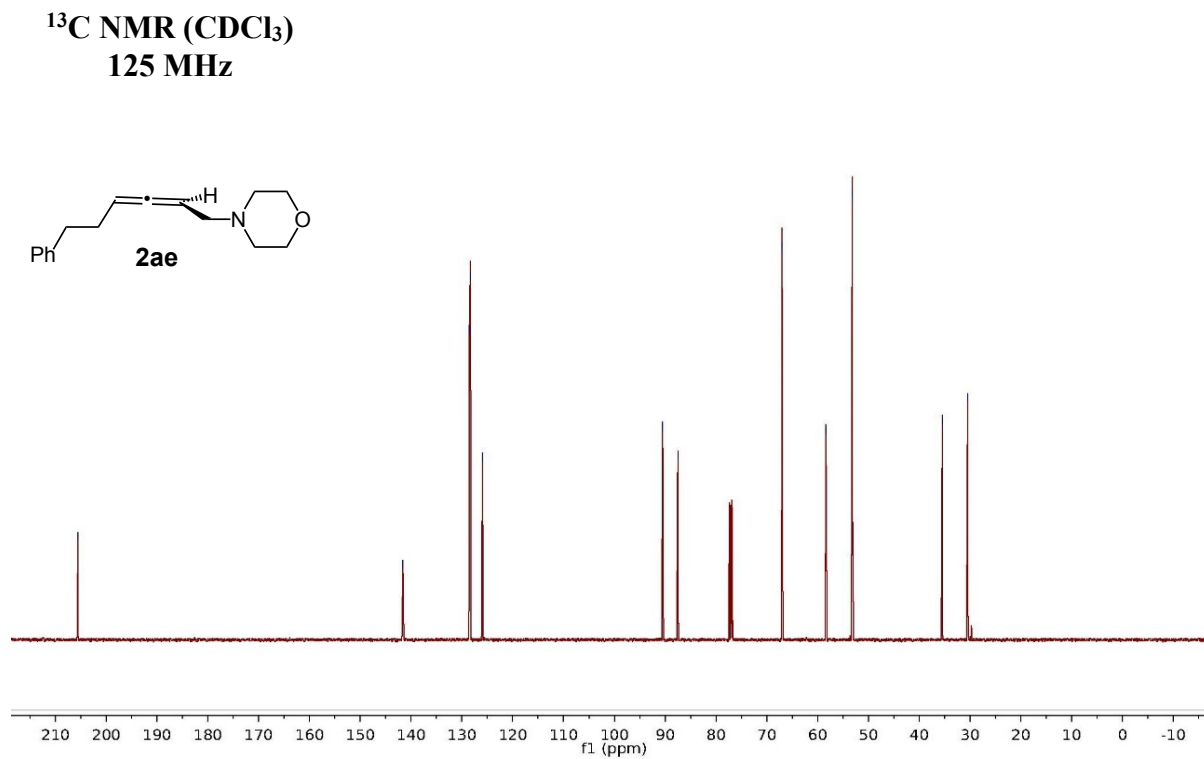

**<sup>1</sup>H NMR (CDCl<sub>3</sub>)  
400 MHz**

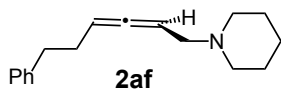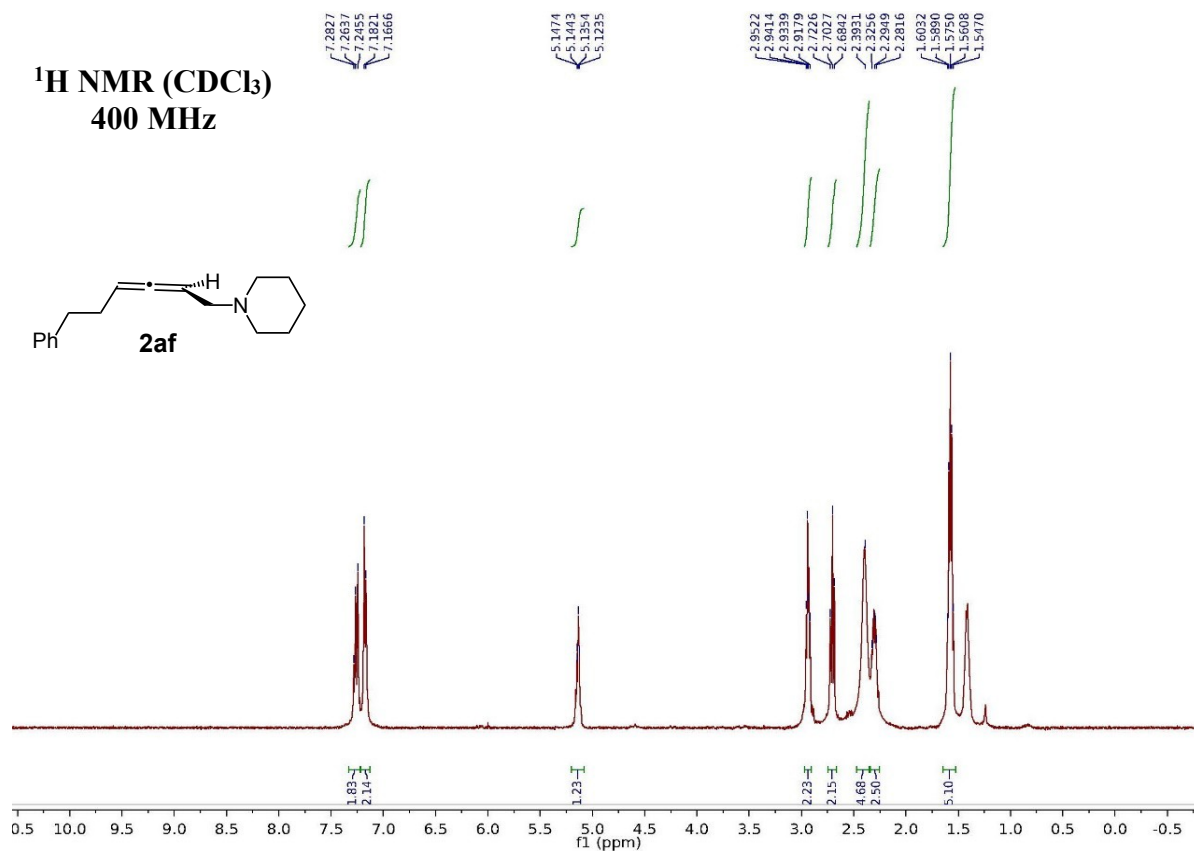

**<sup>13</sup>C NMR (CDCl<sub>3</sub>)  
125 MHz**

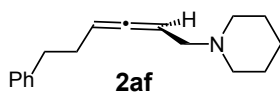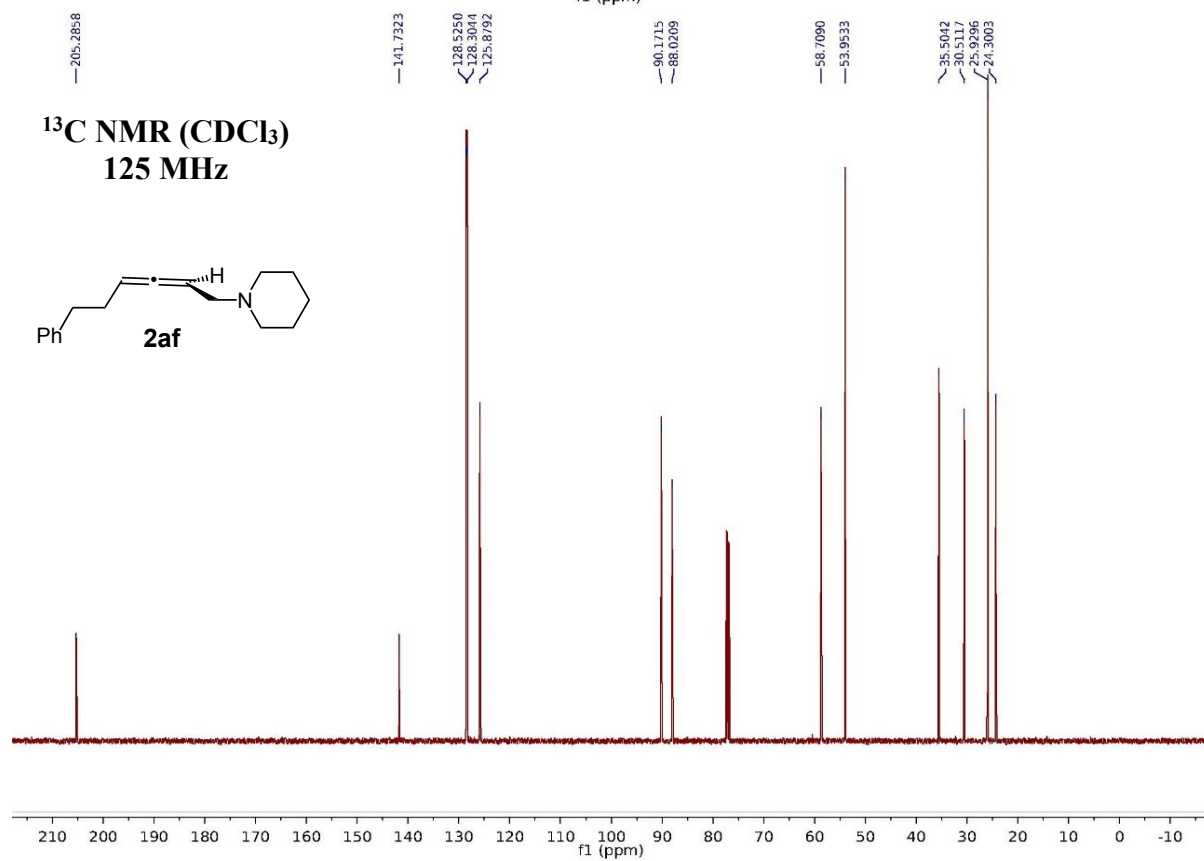

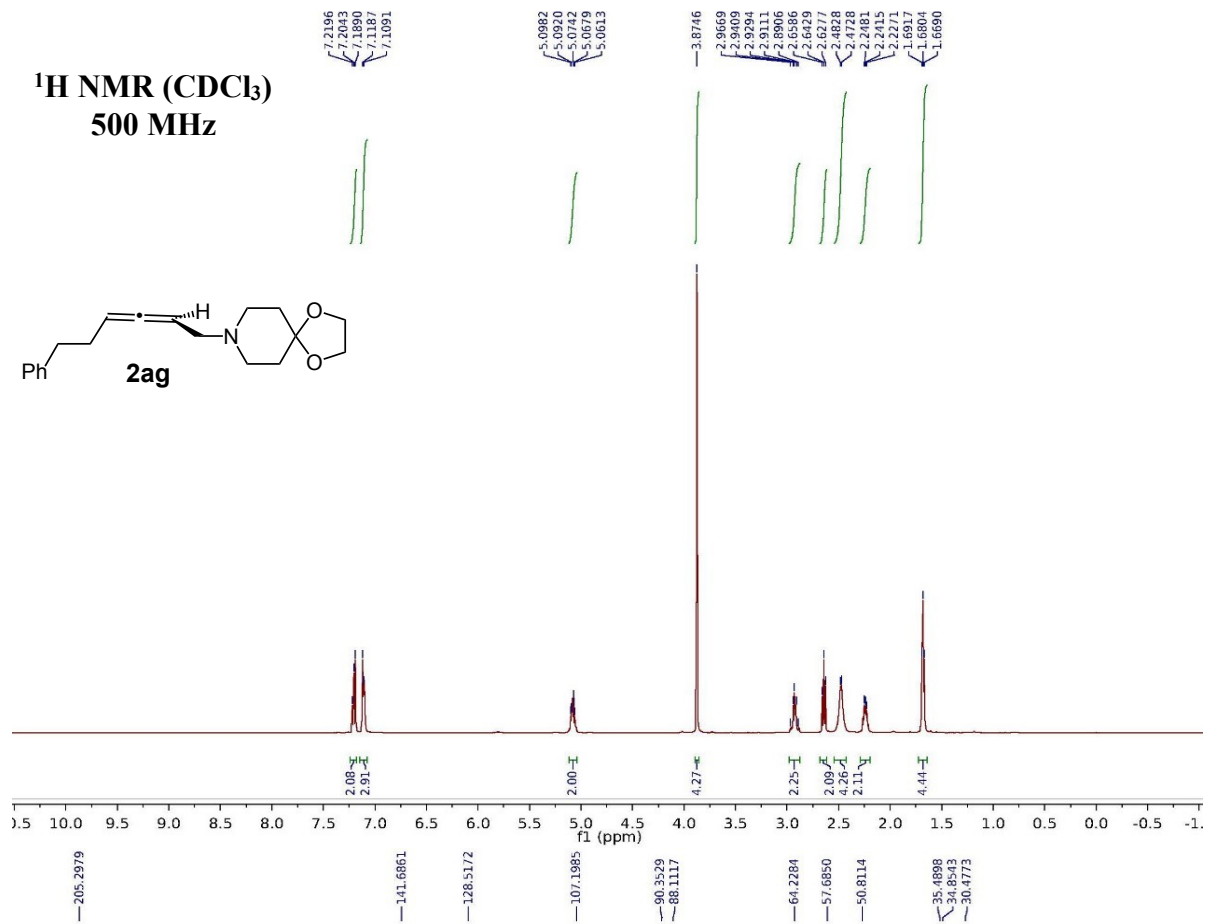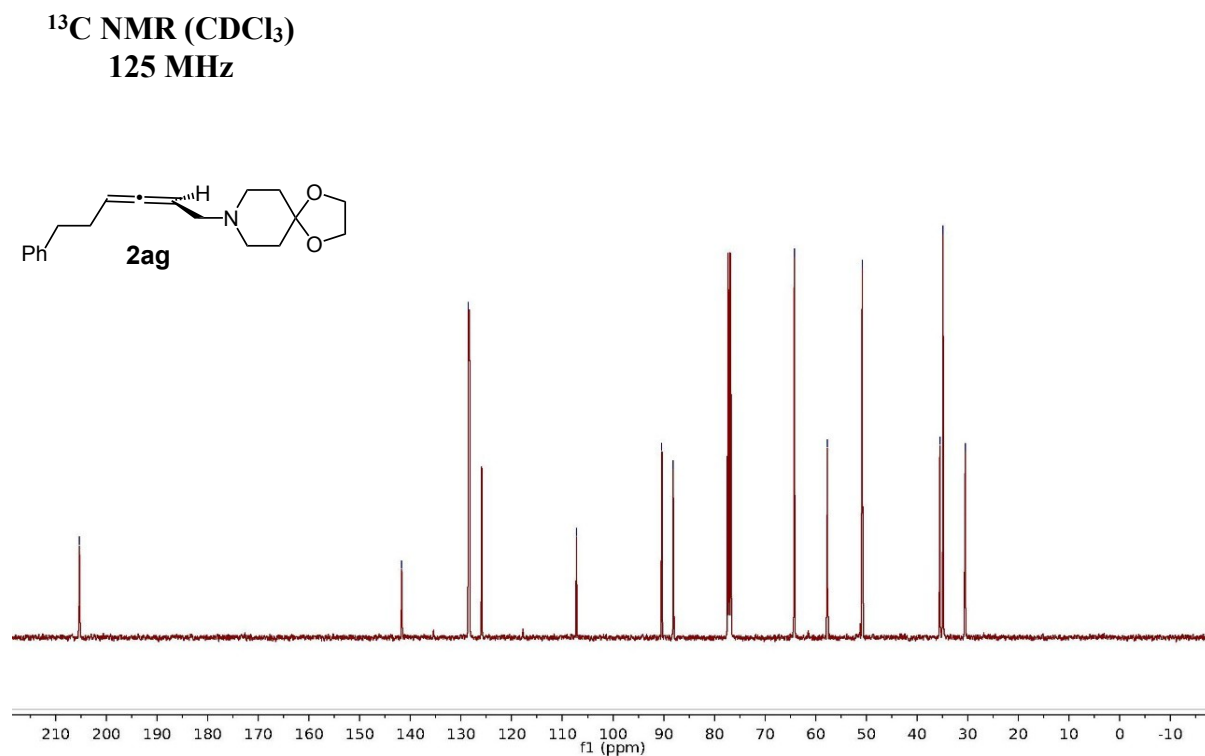

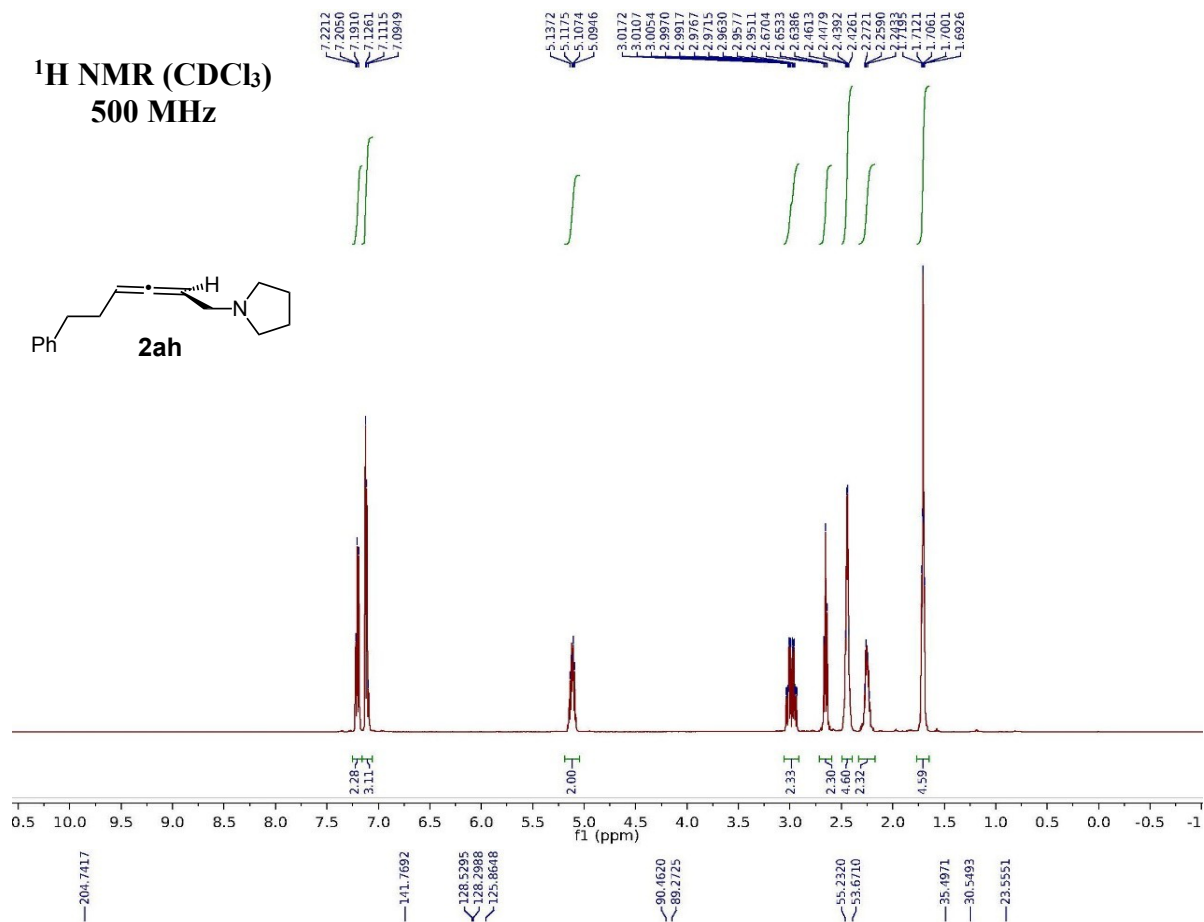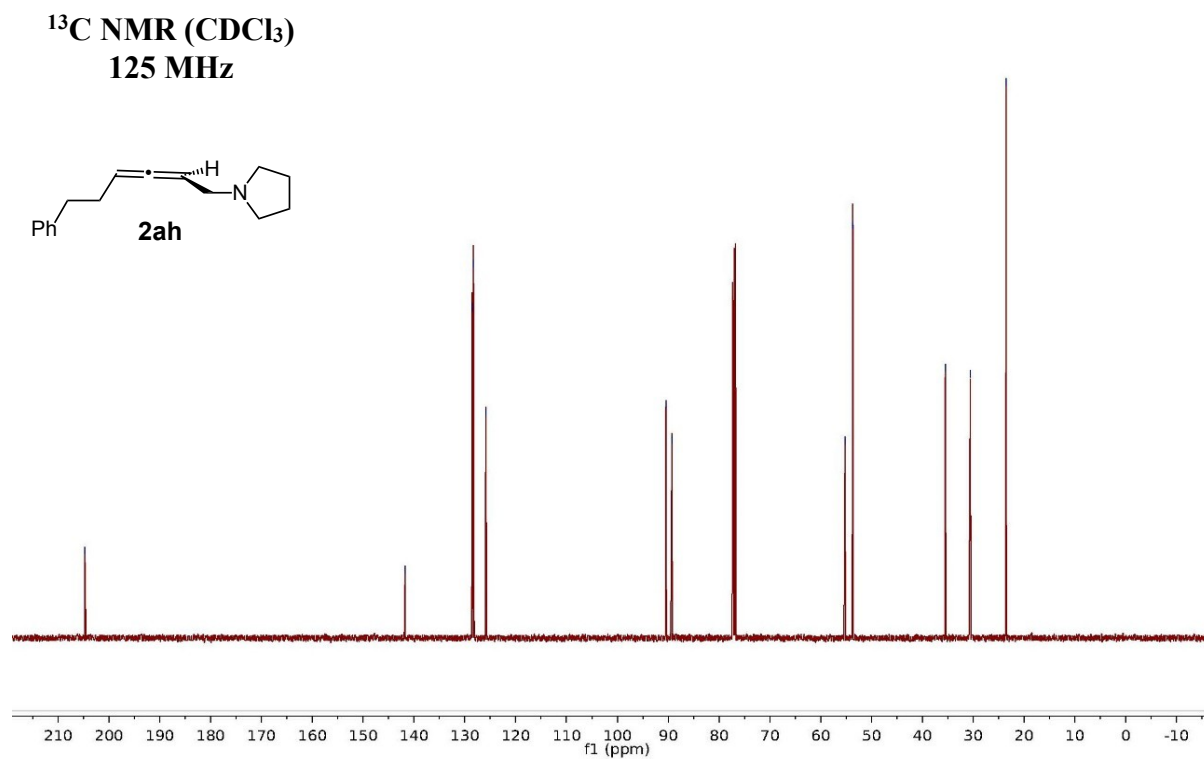

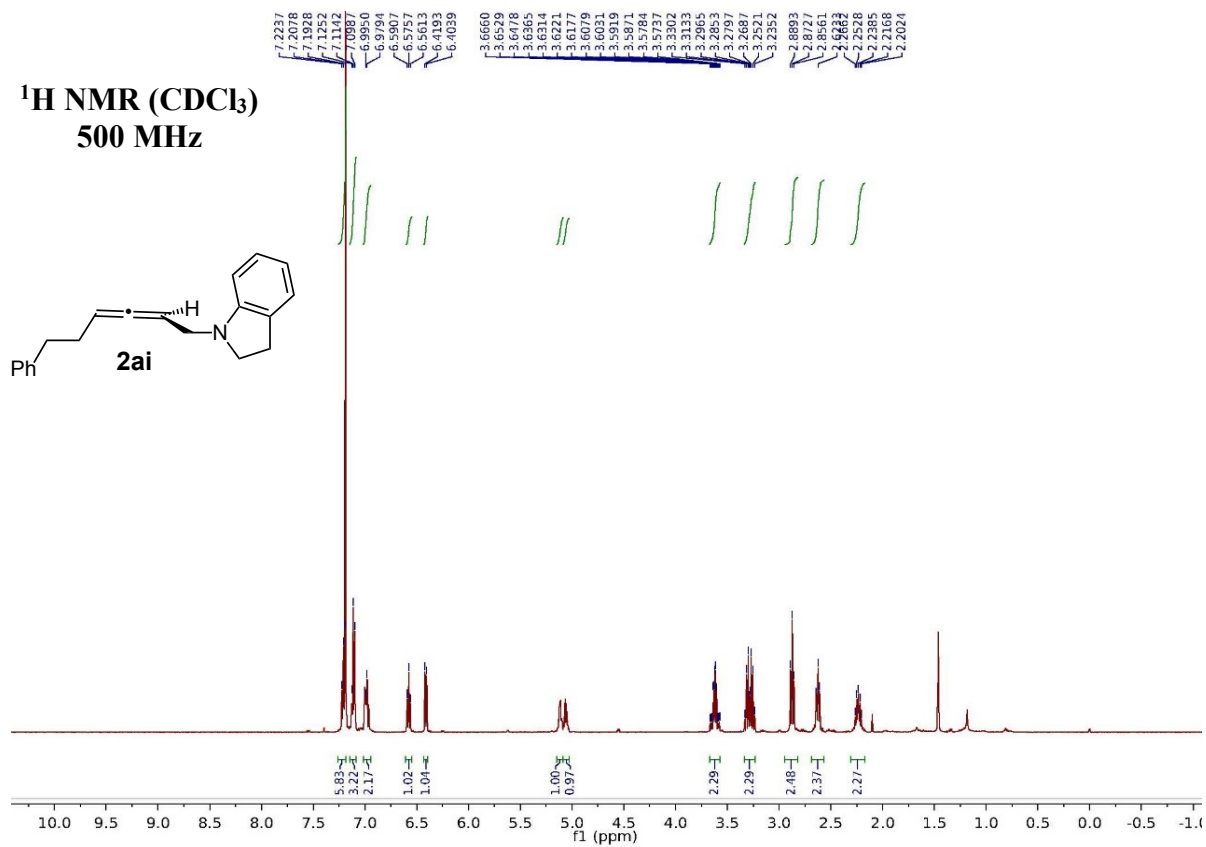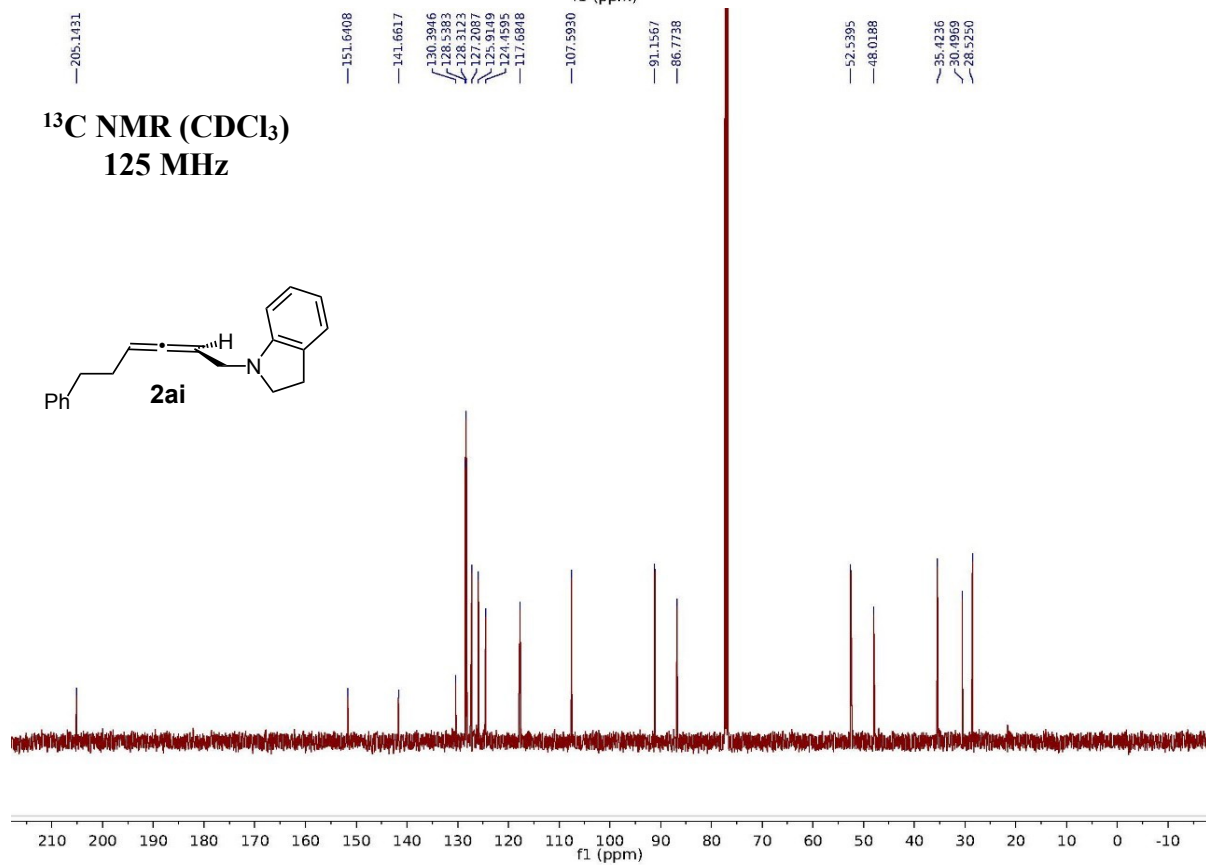

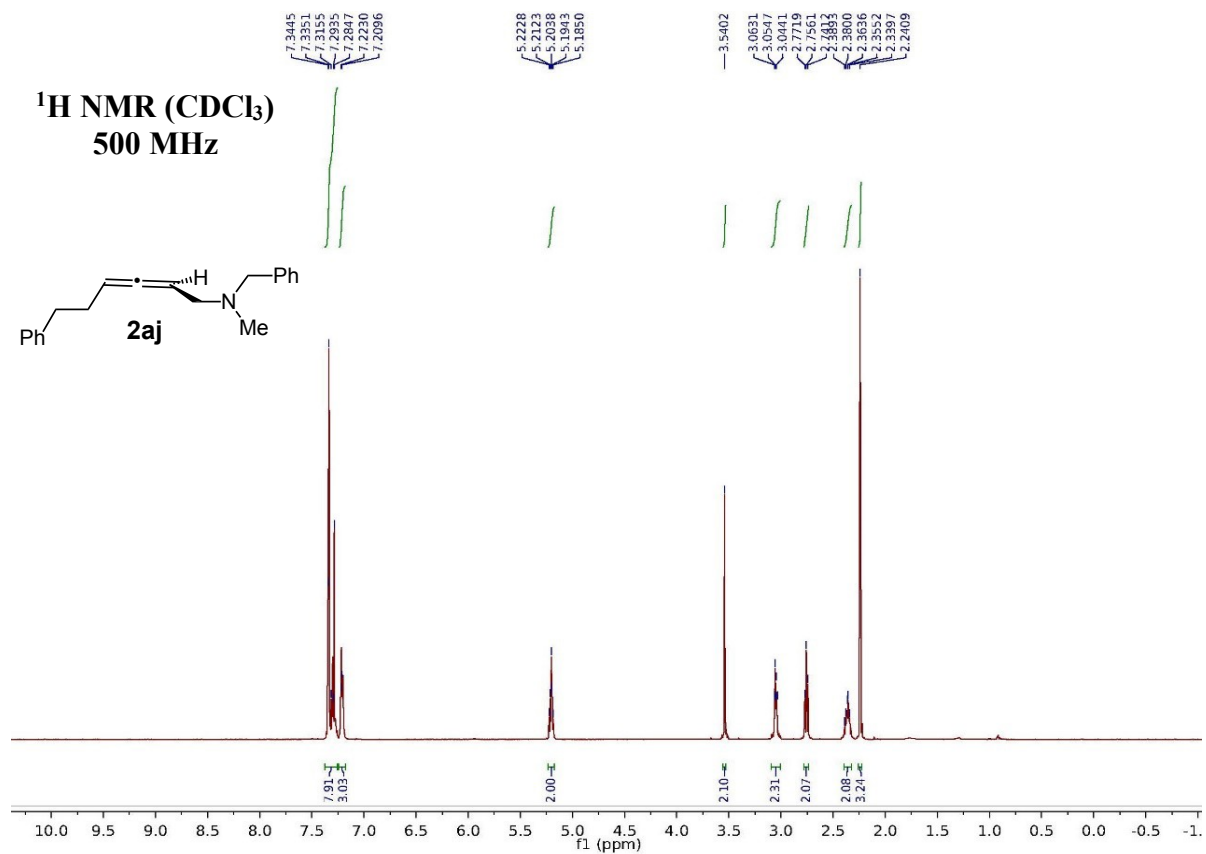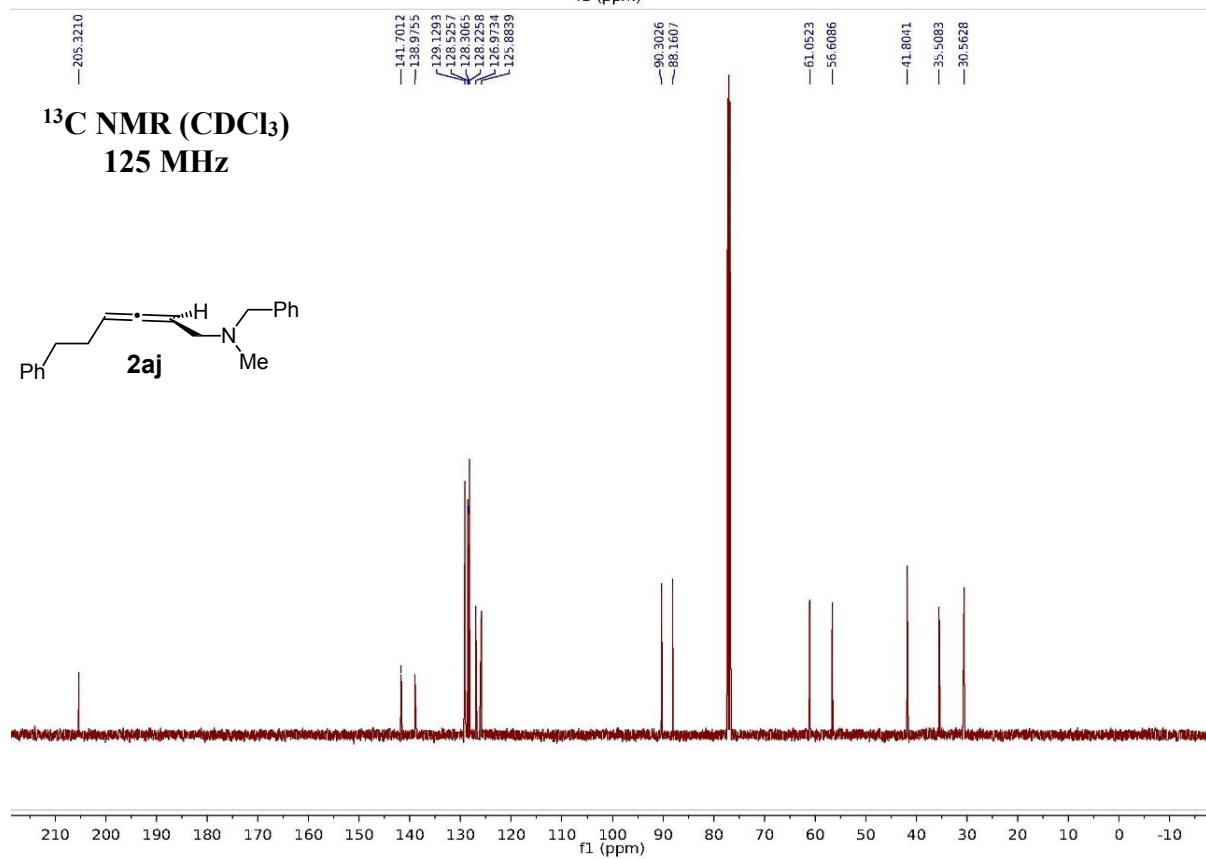



**<sup>1</sup>H NMR (CDCl<sub>3</sub>)  
500 MHz**

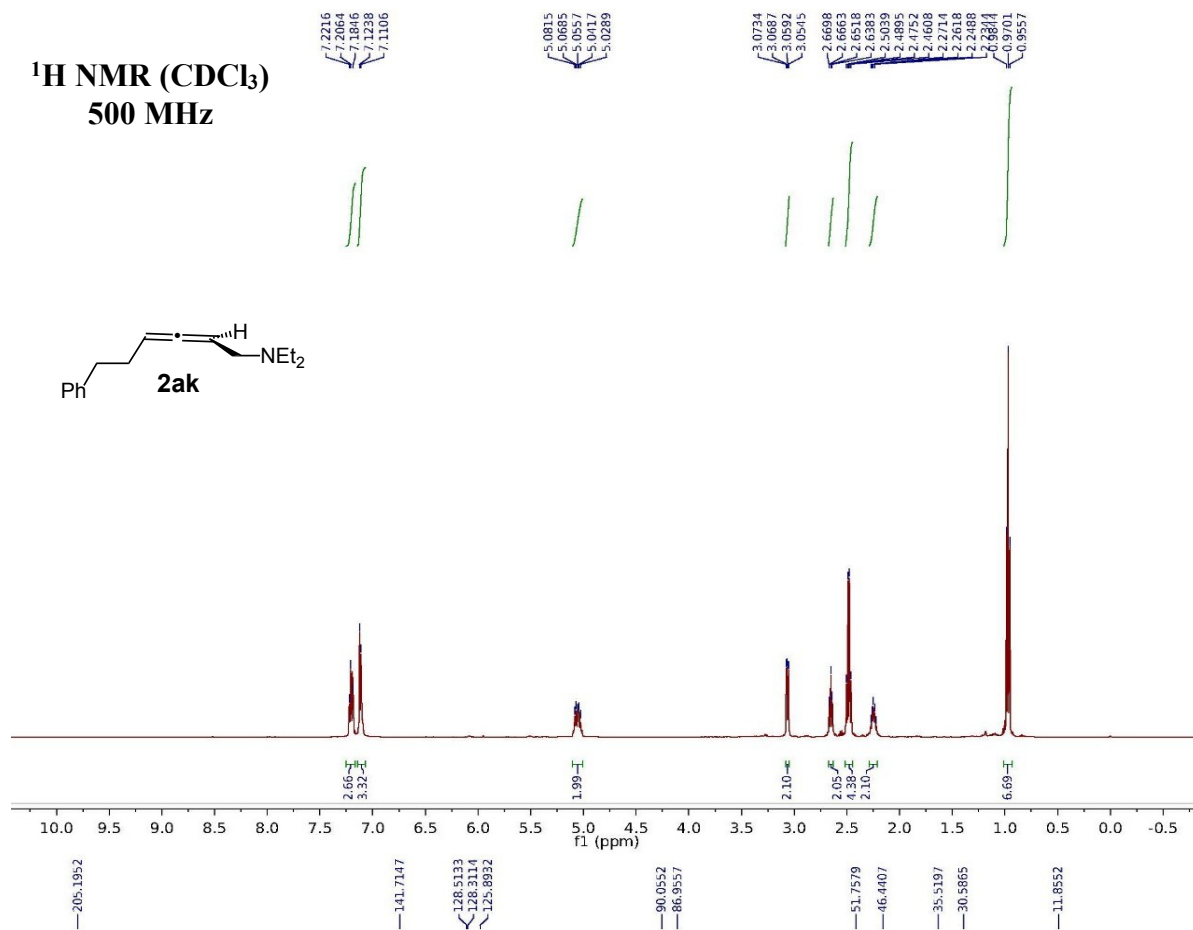

**<sup>13</sup>C NMR (CDCl<sub>3</sub>)  
125 MHz**

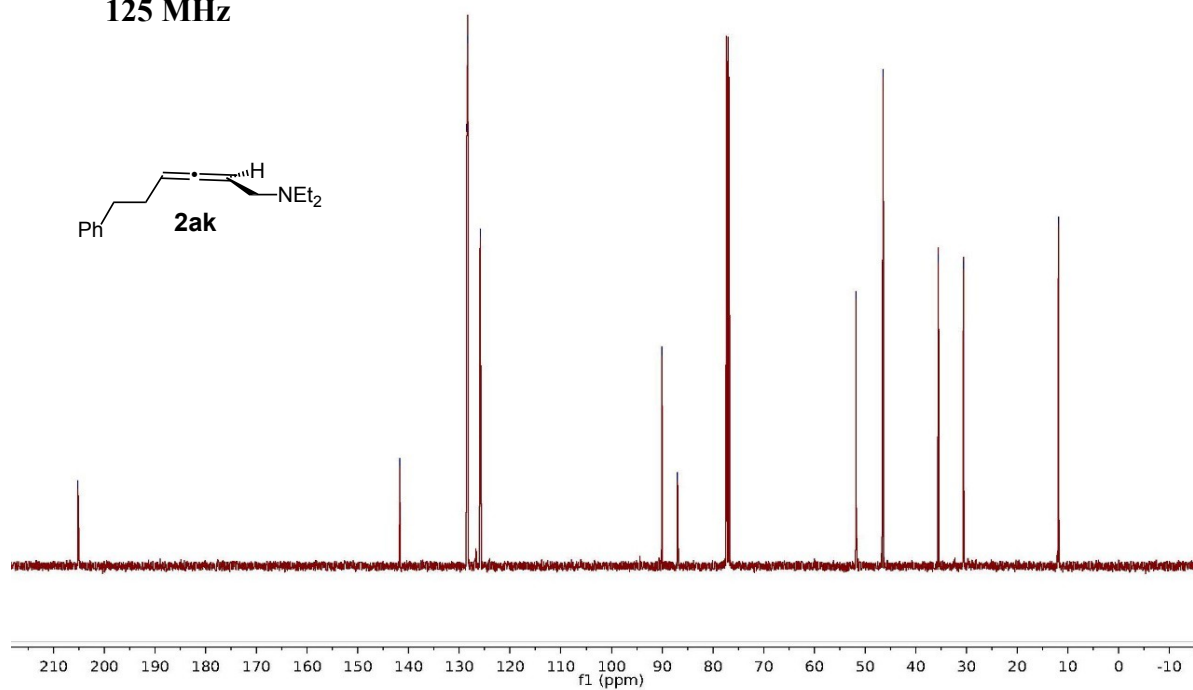

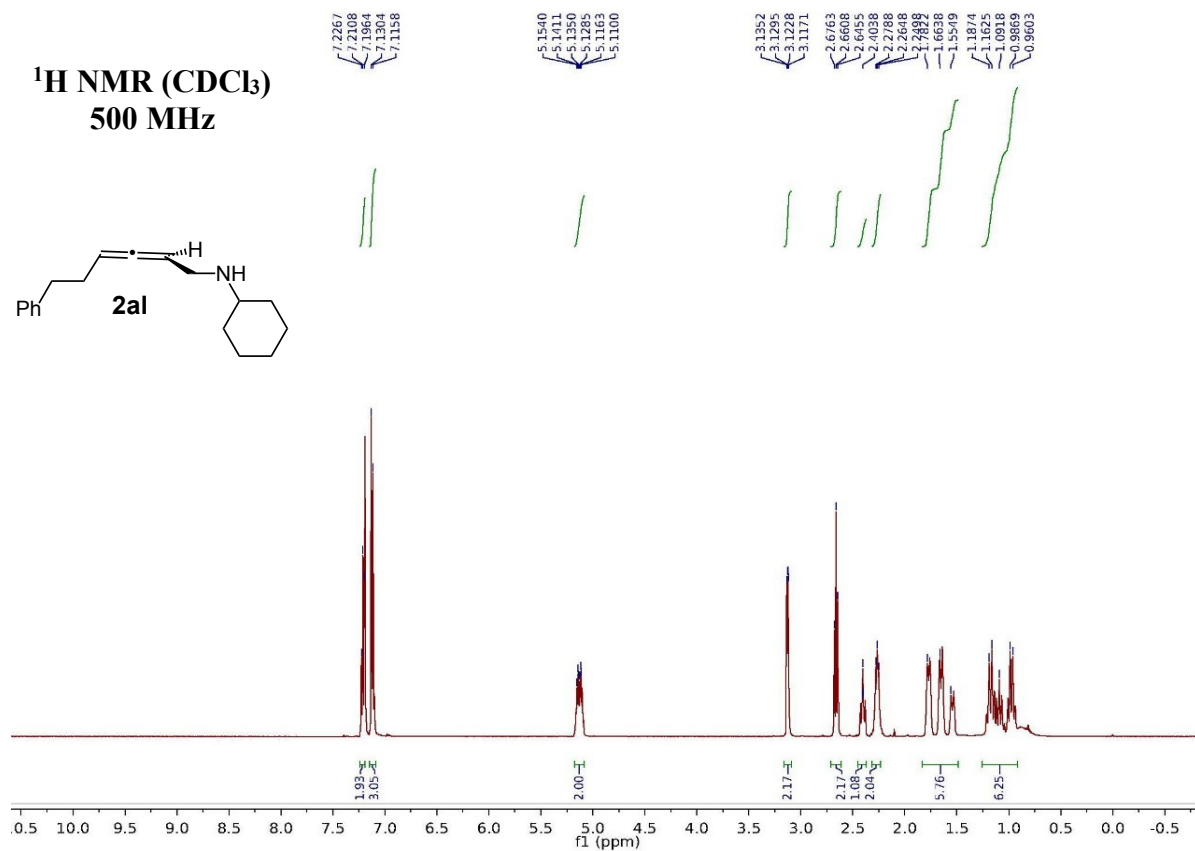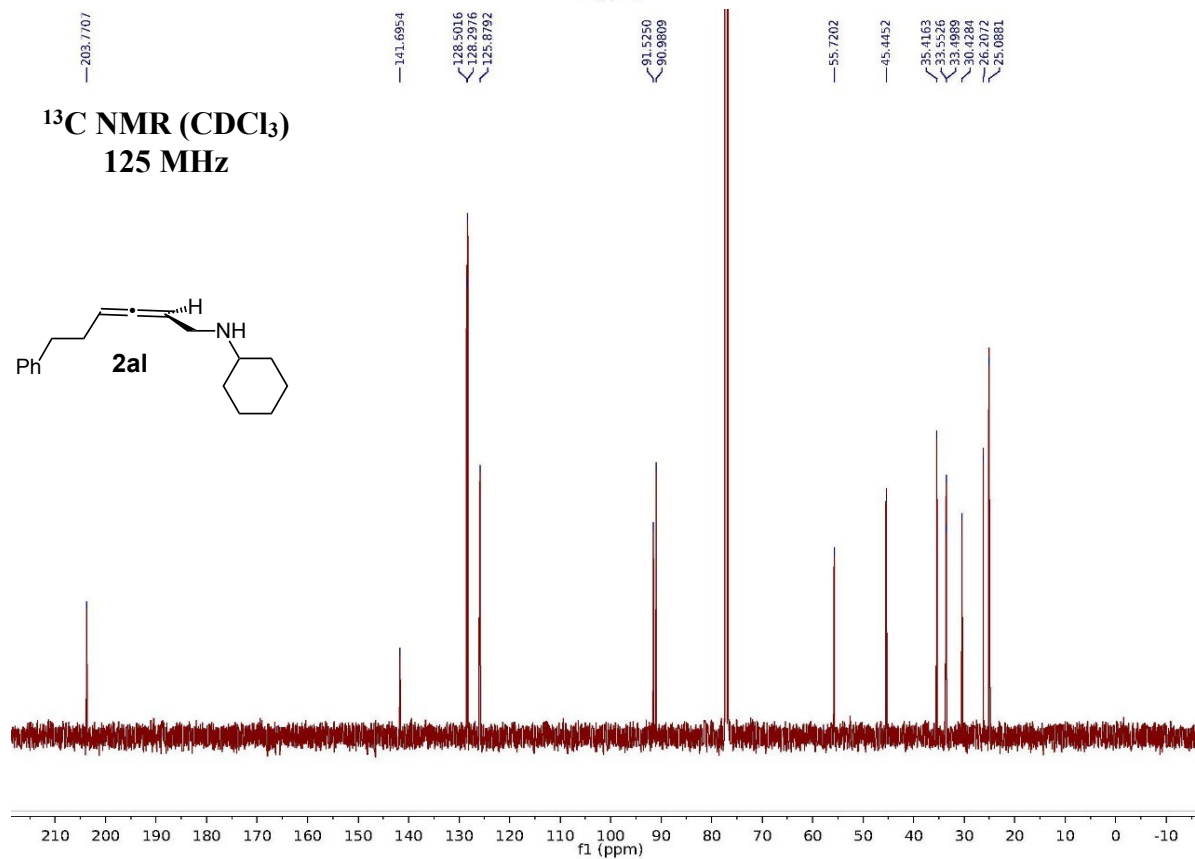

**$^1\text{H}$  NMR ( $\text{CDCl}_3$ )  
400 MHz**

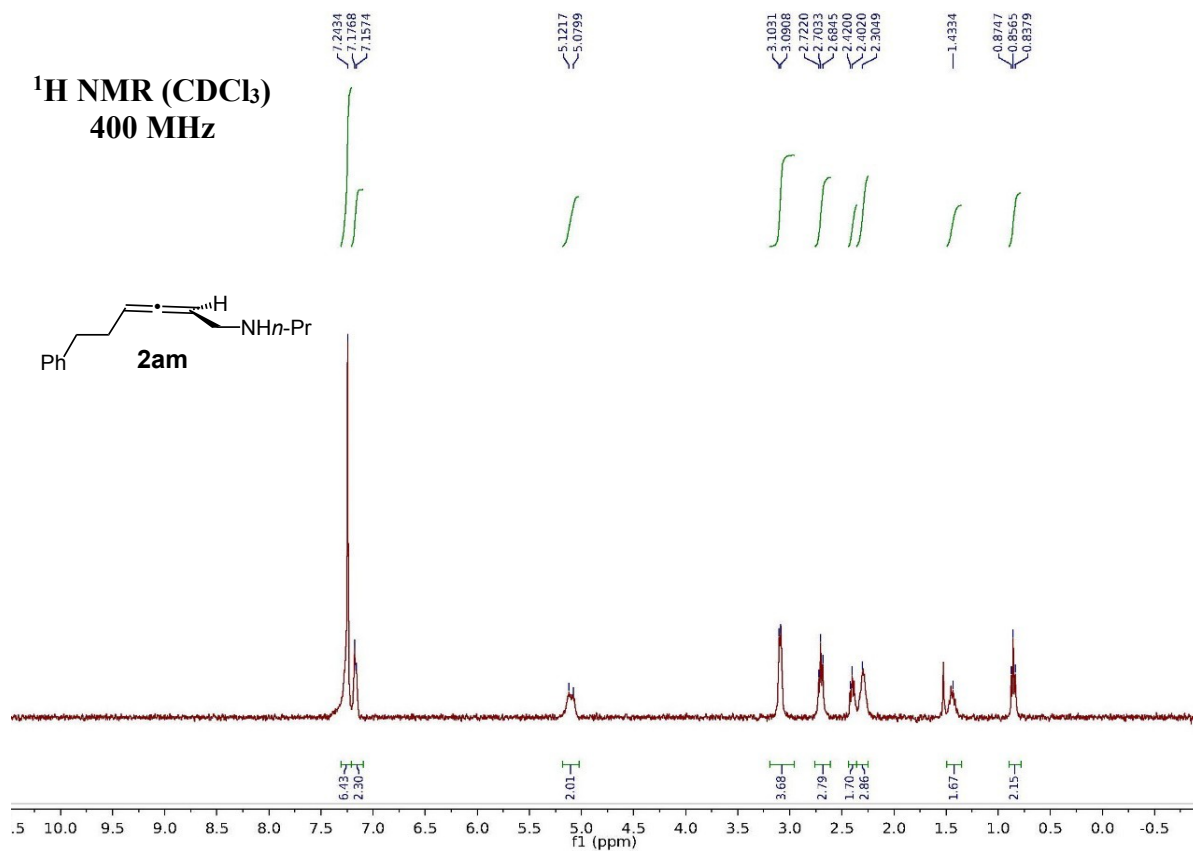

**$^{13}\text{C}$  NMR ( $\text{CDCl}_3$ )  
125 MHz**

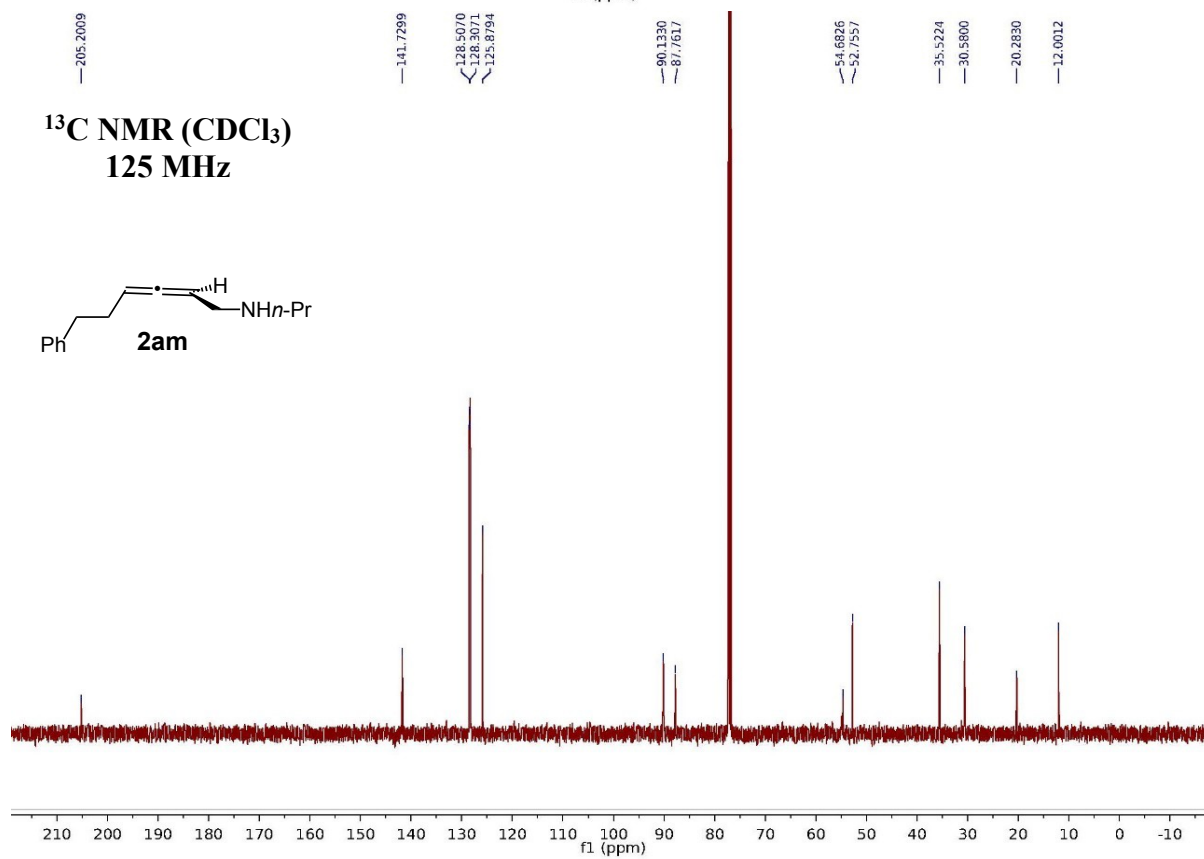

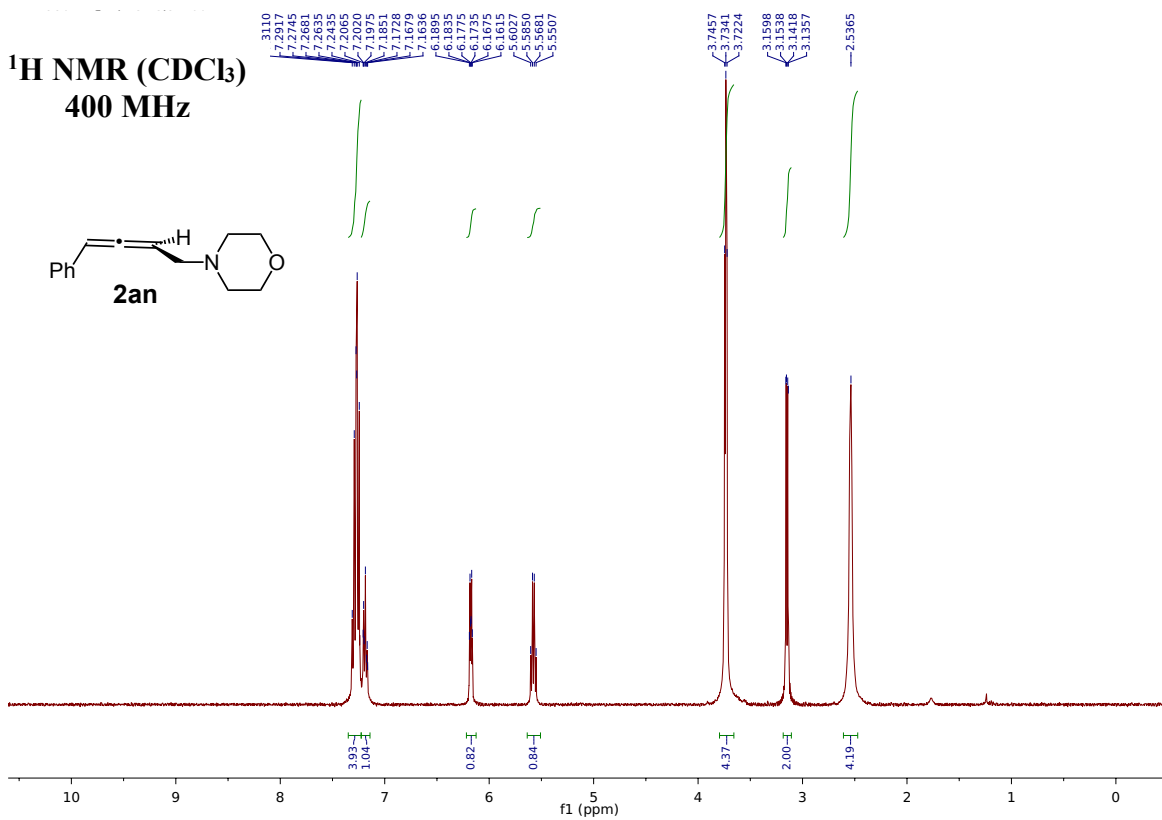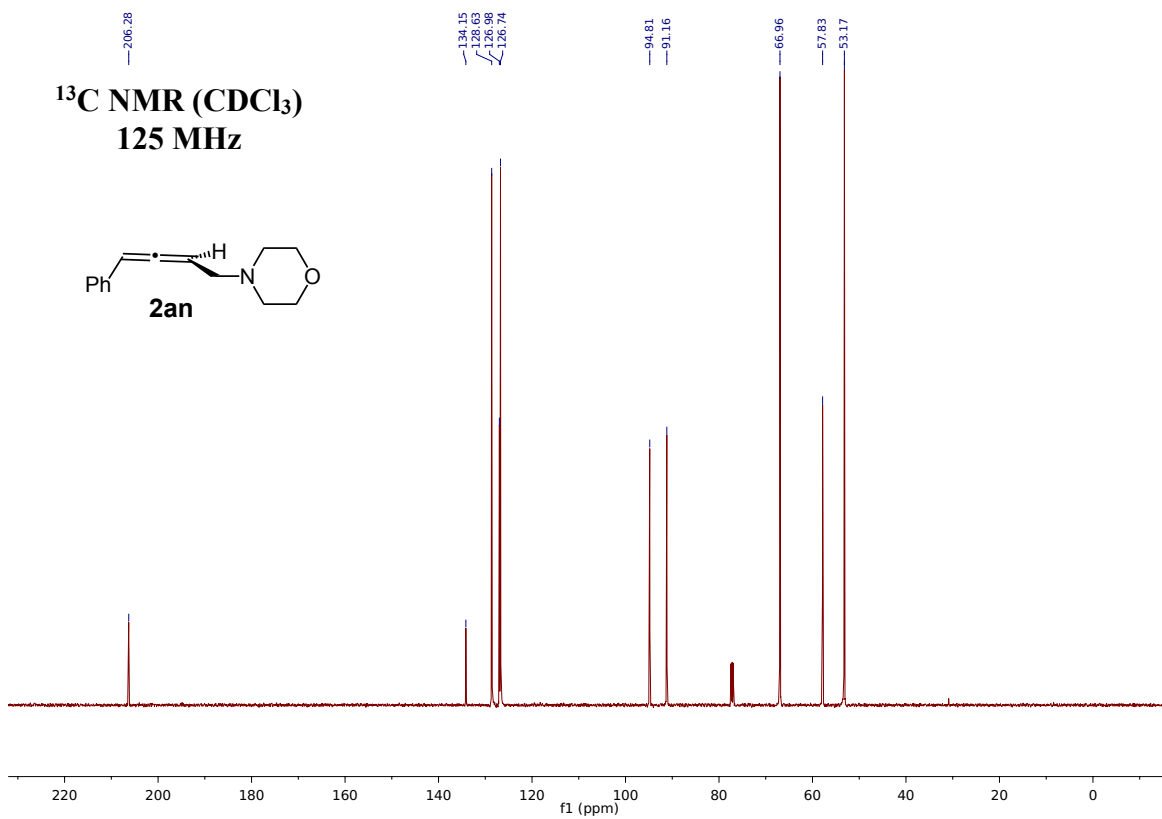

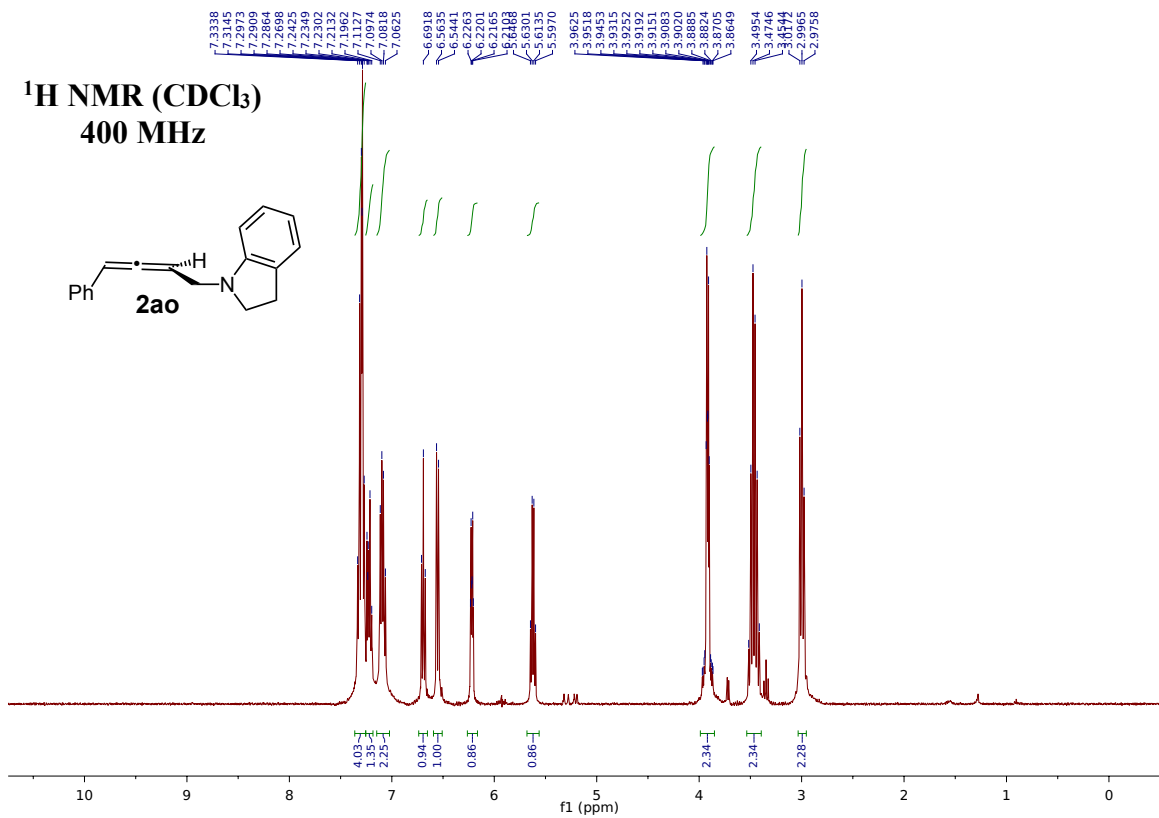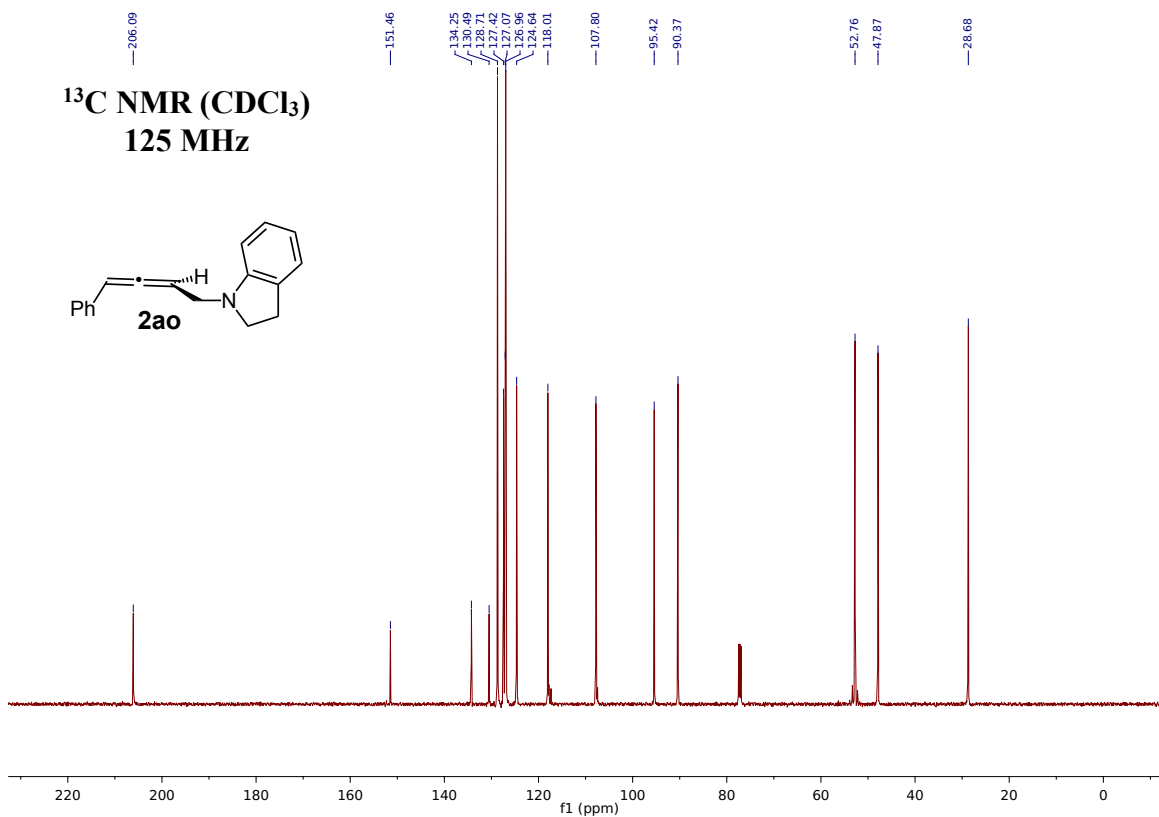

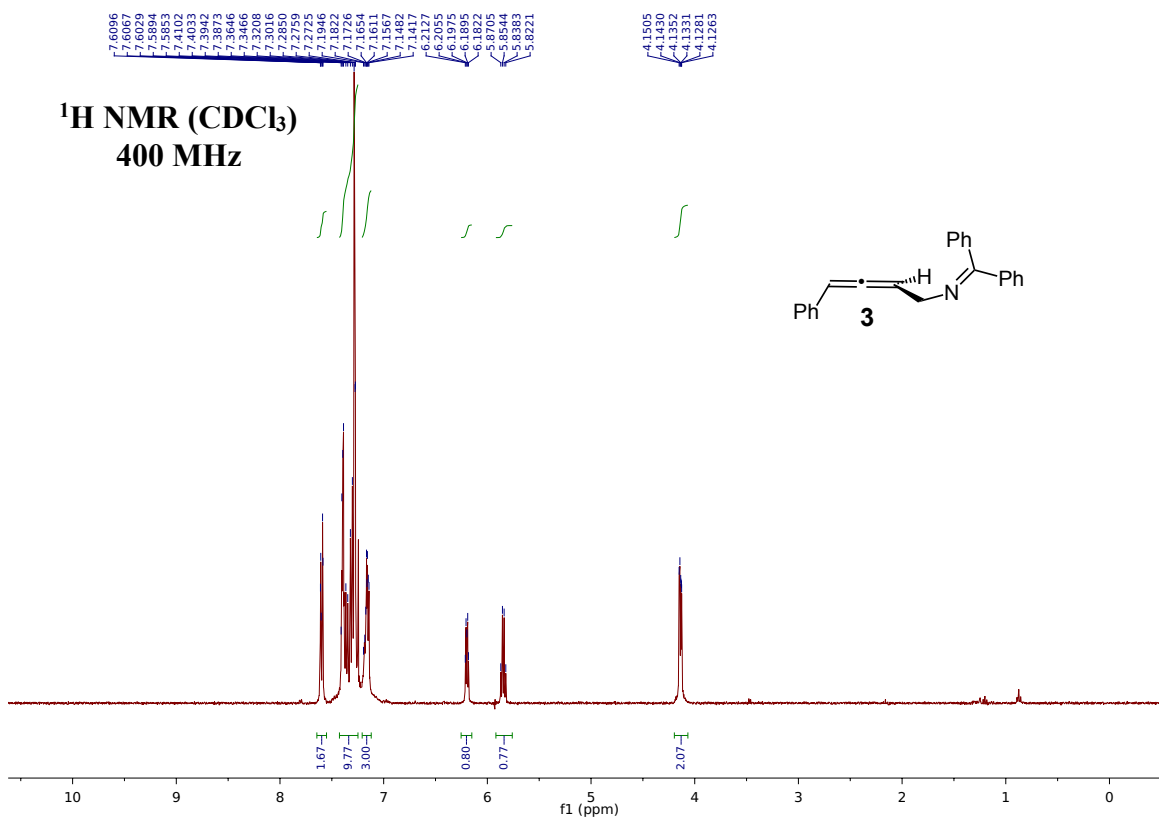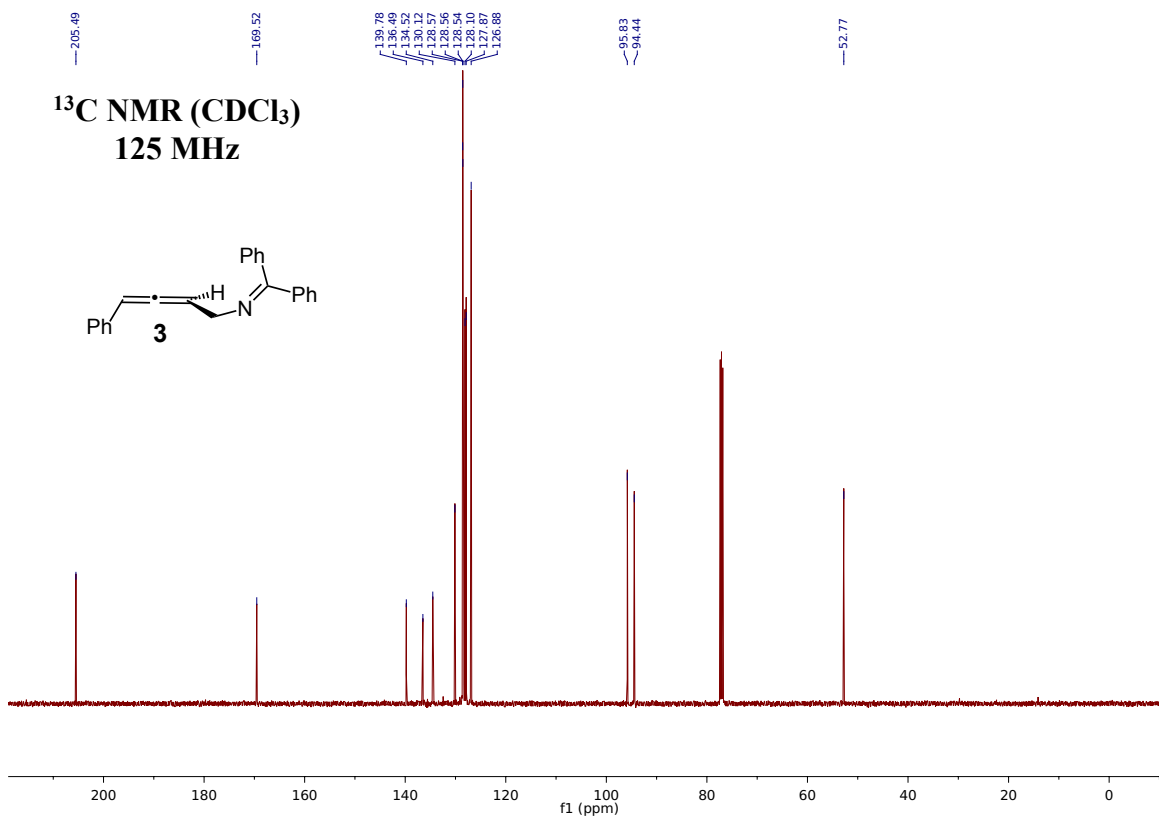

**<sup>1</sup>H NMR (DMSO-*d*<sub>6</sub>)  
400 MHz**

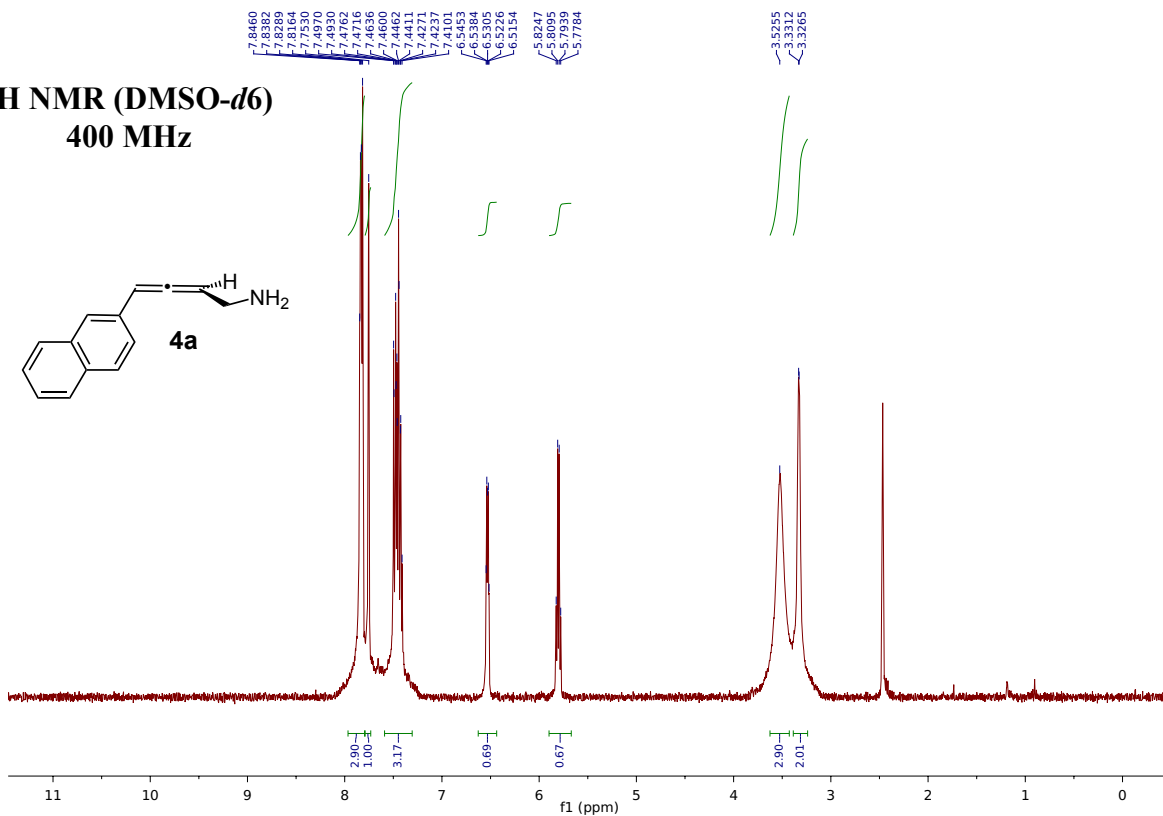

**<sup>13</sup>C NMR (DMSO-*d*<sub>6</sub>)  
125 MHz**

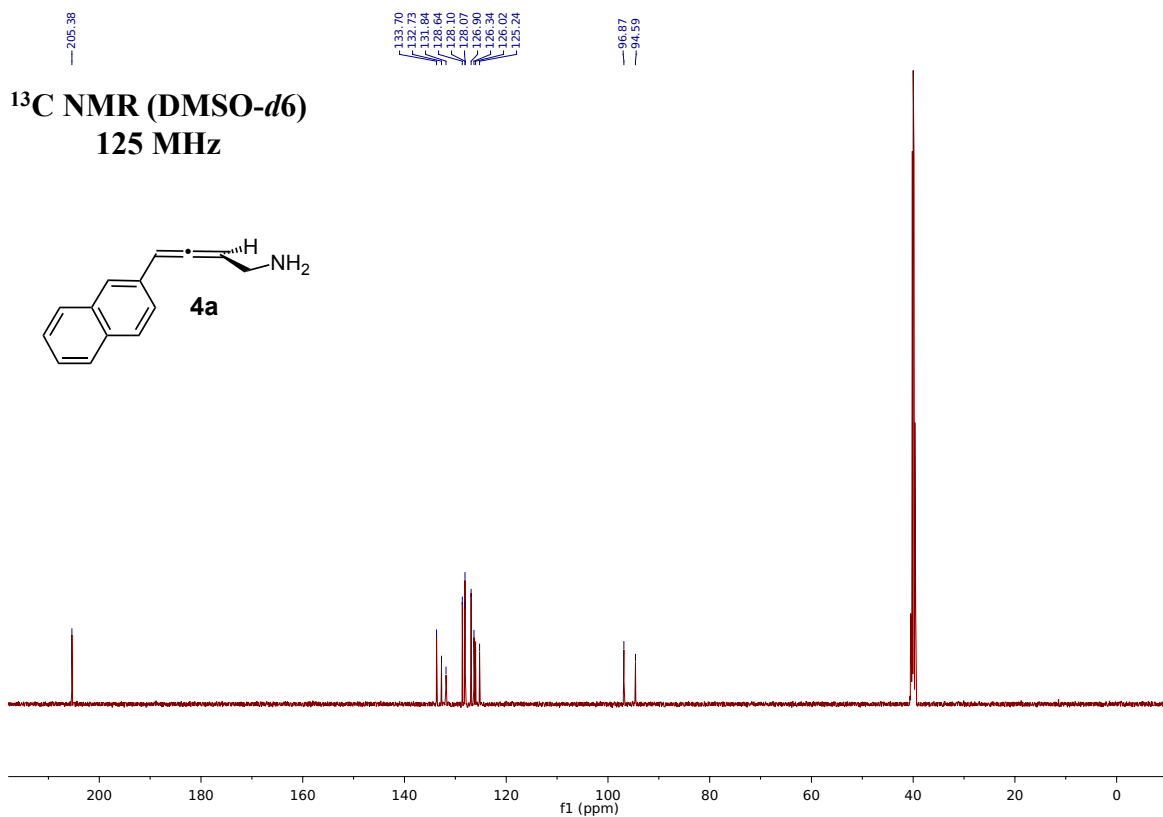

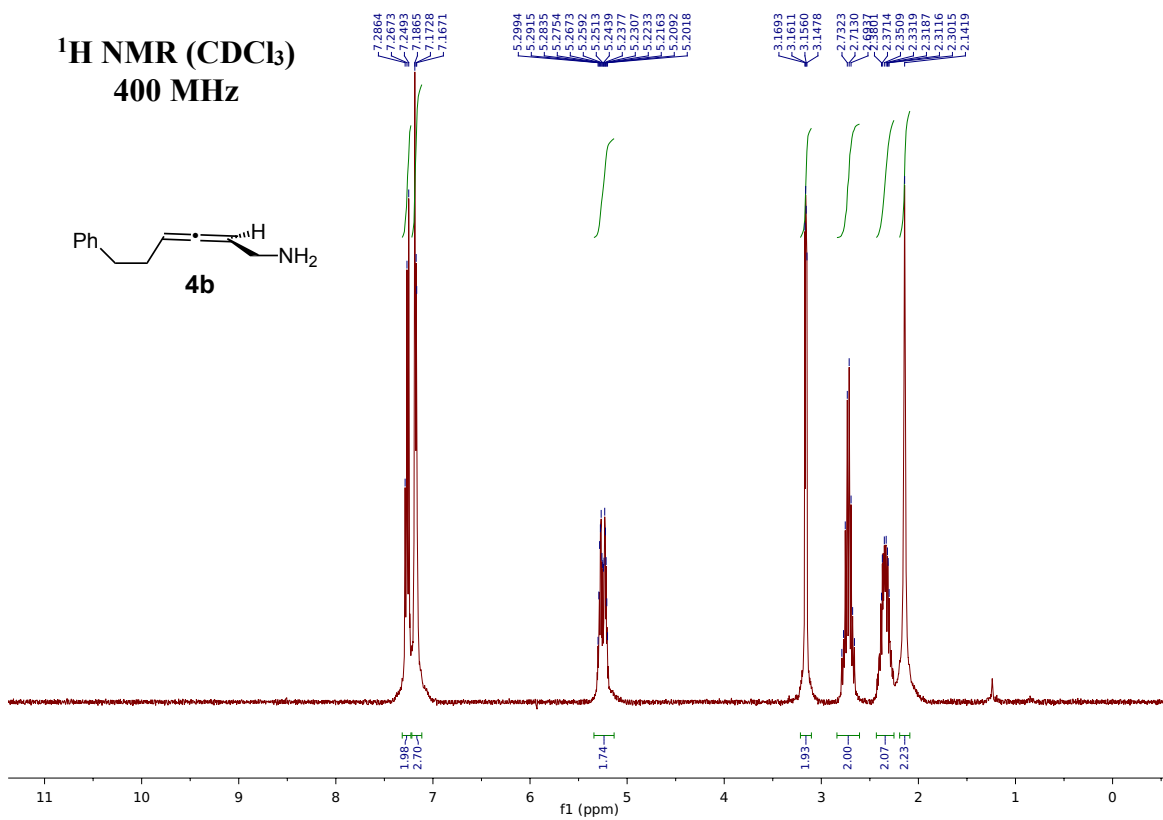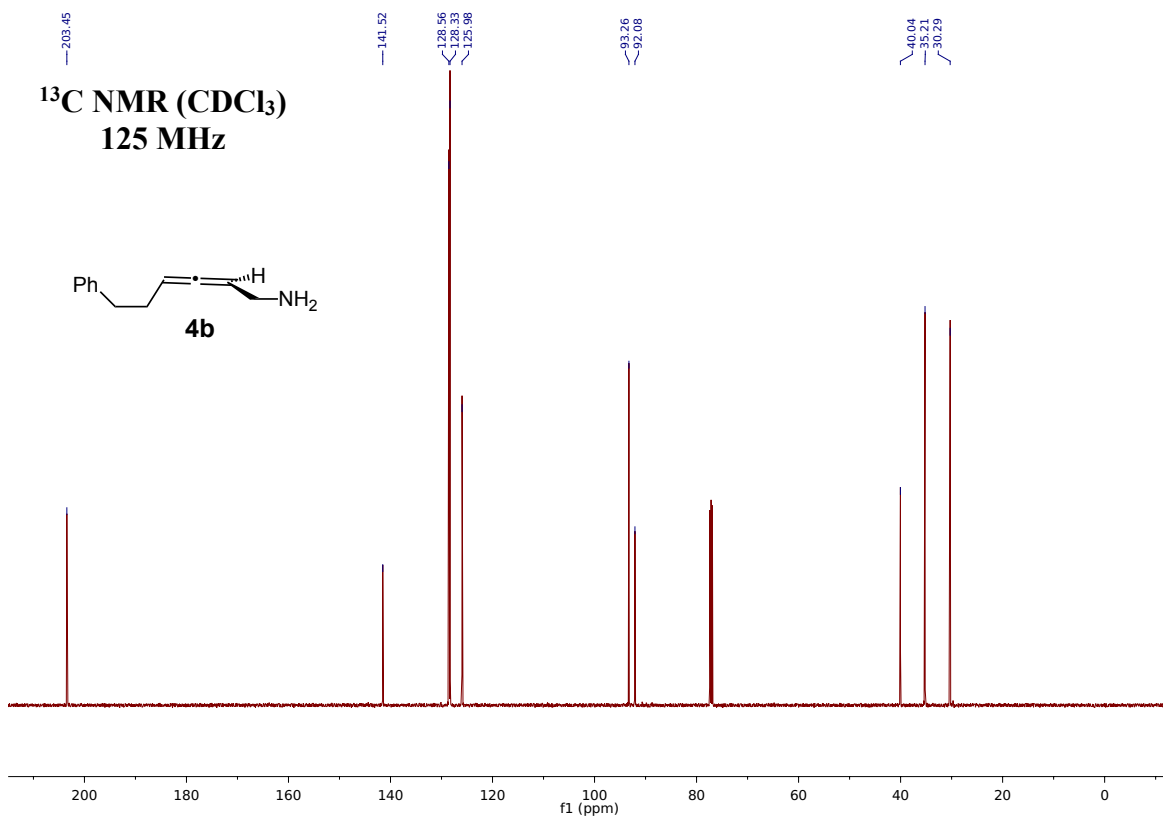



**<sup>1</sup>H NMR (CDCl<sub>3</sub>)  
400 MHz**

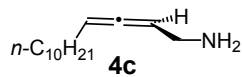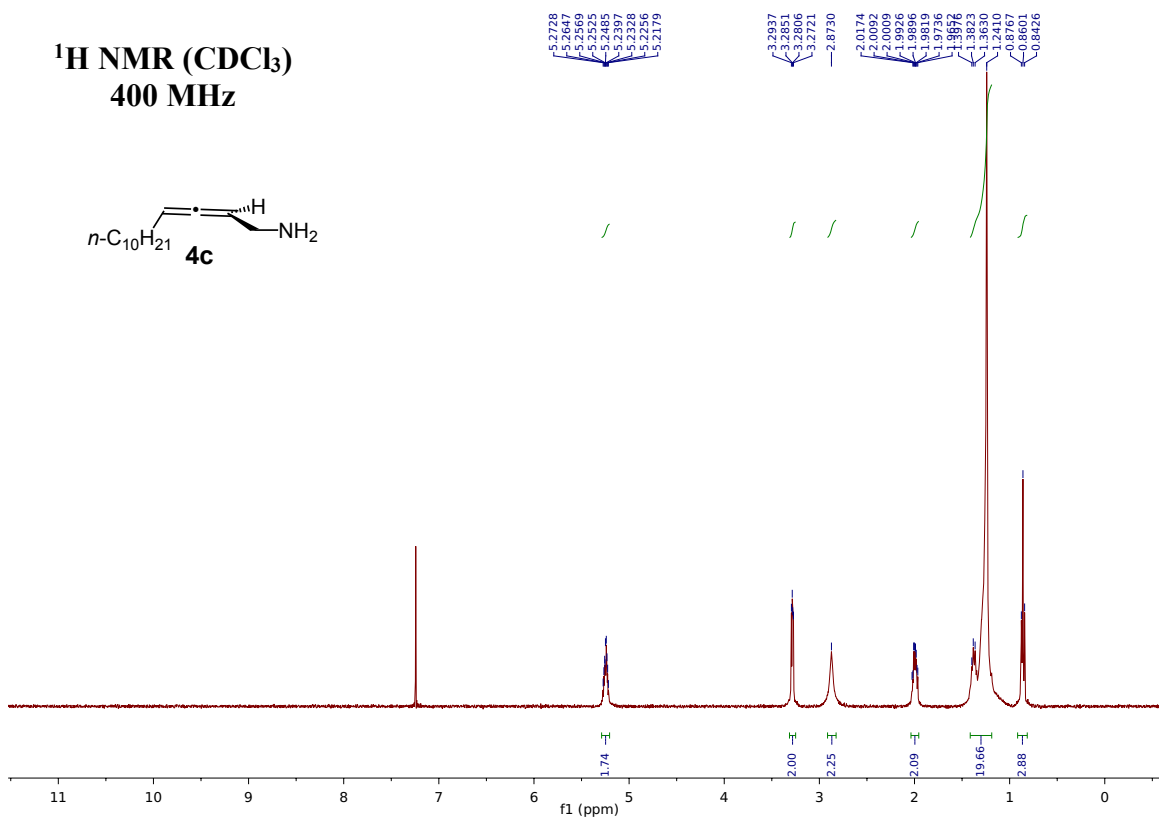

**<sup>13</sup>C NMR (CDCl<sub>3</sub>)  
125 MHz**

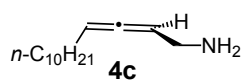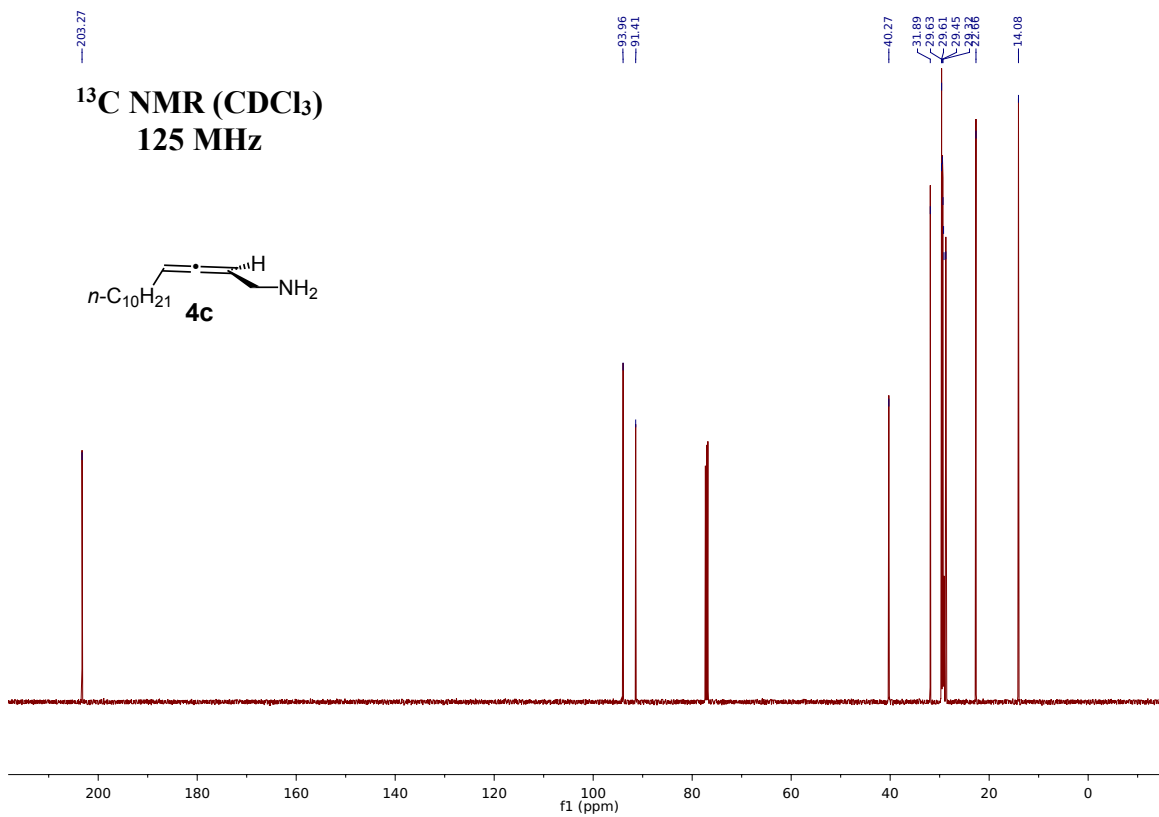

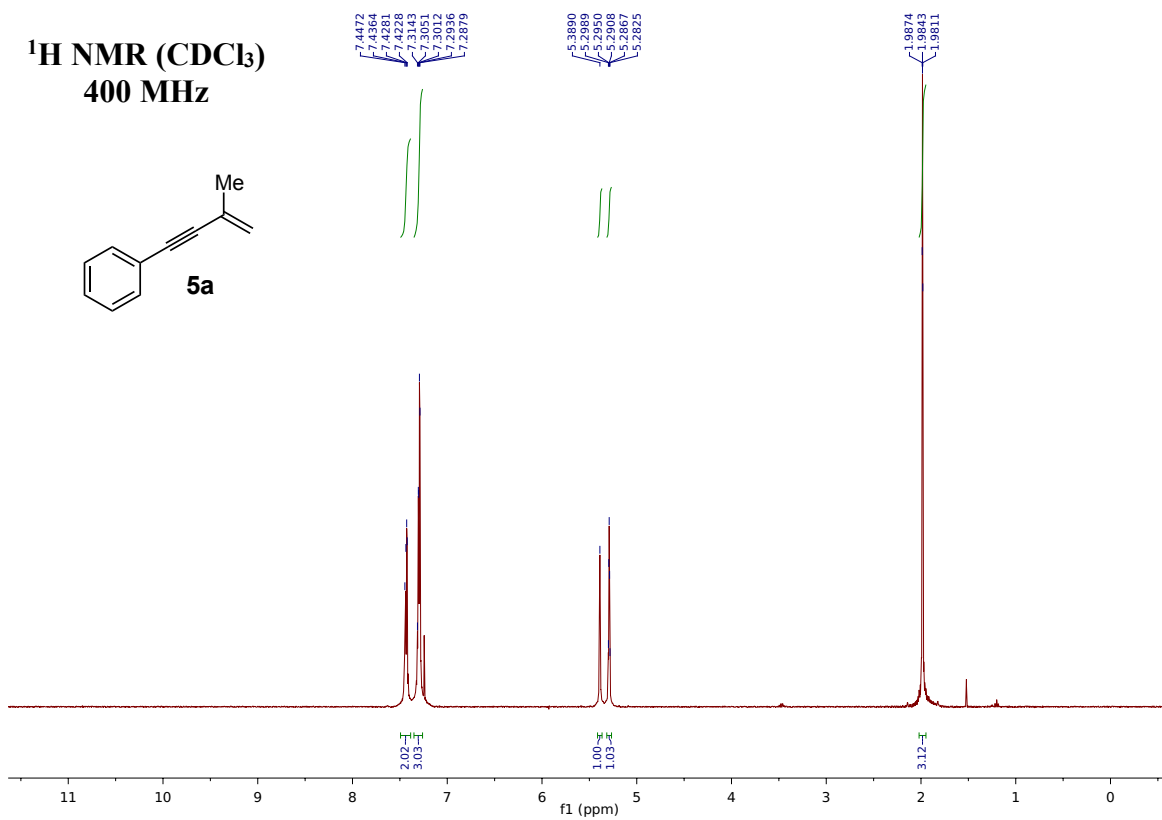

$^1\text{H}$  NMR ( $\text{CDCl}_3$ )  
500 MHz

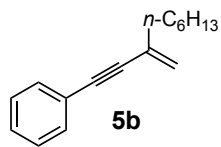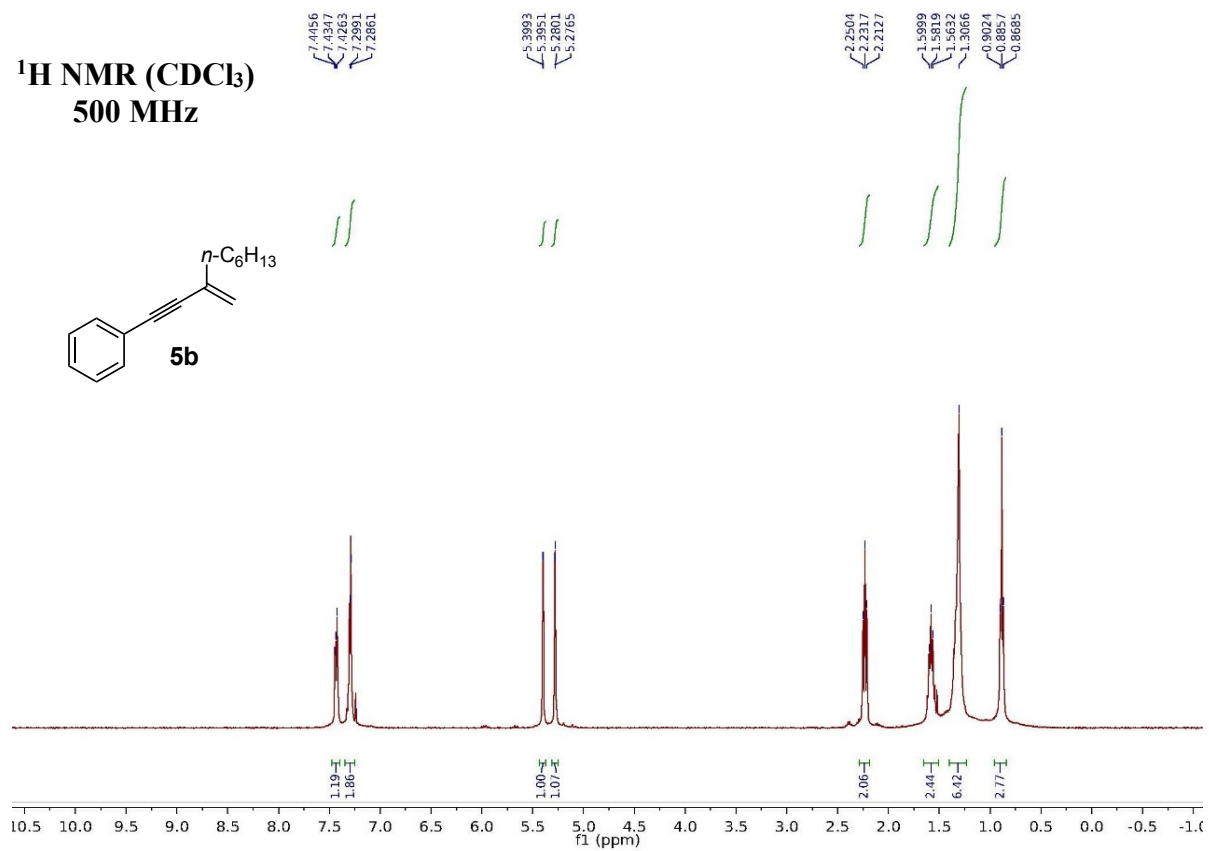

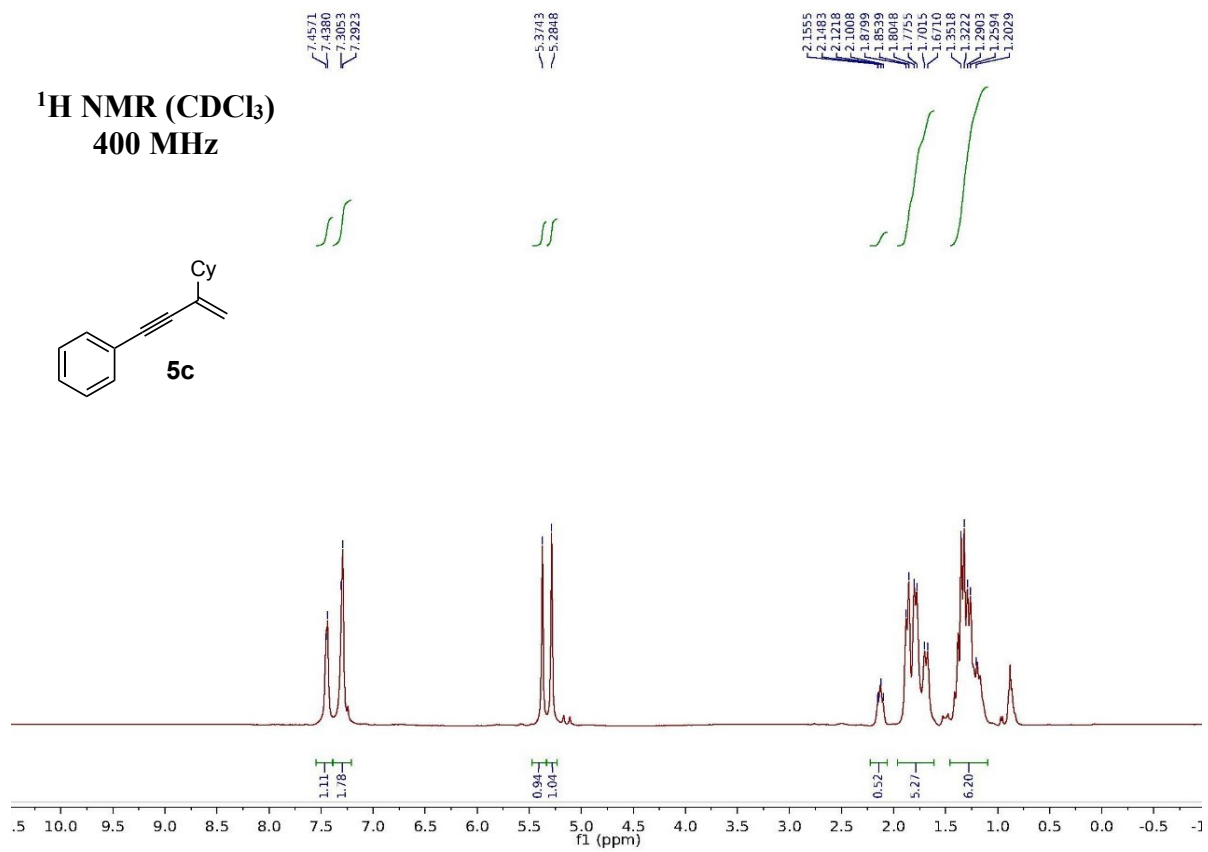

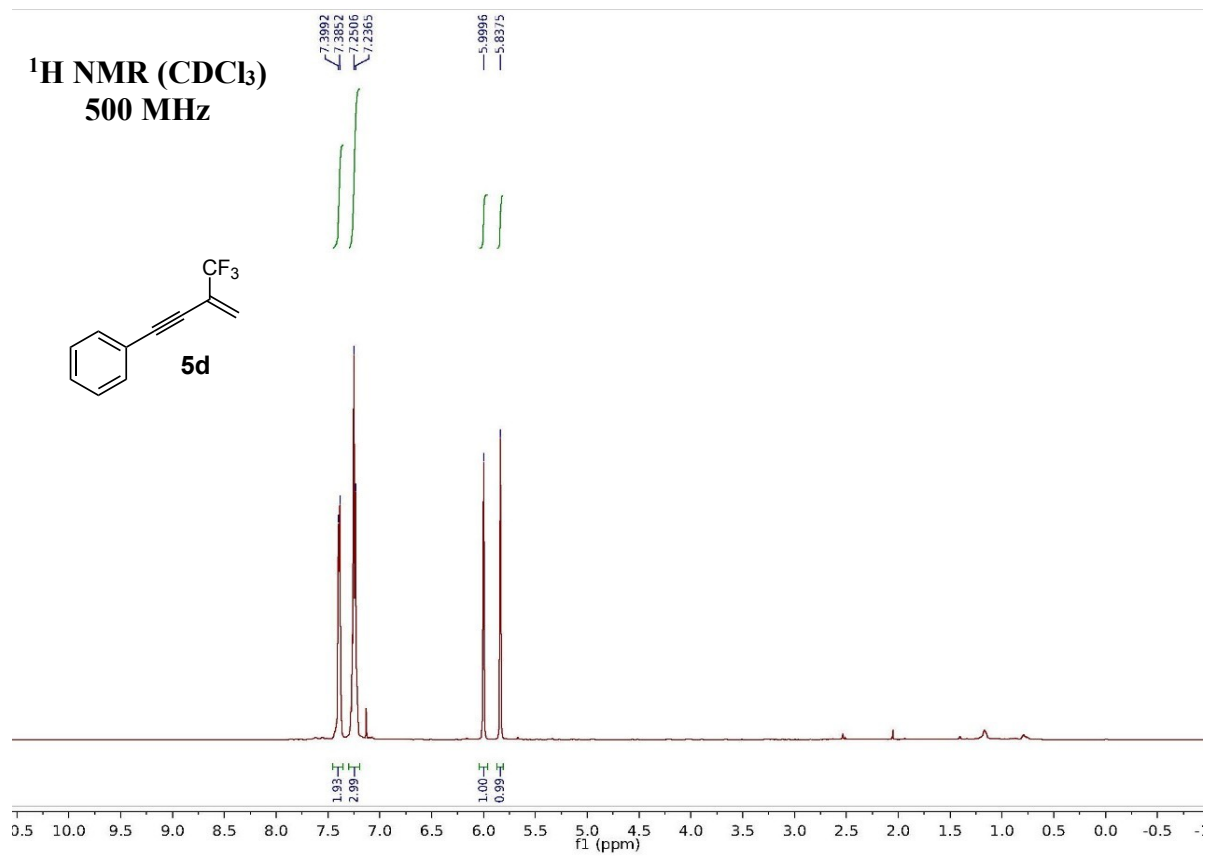

$^1\text{H}$  NMR ( $\text{CDCl}_3$ )  
400 MHz

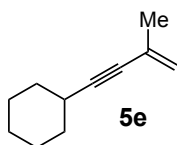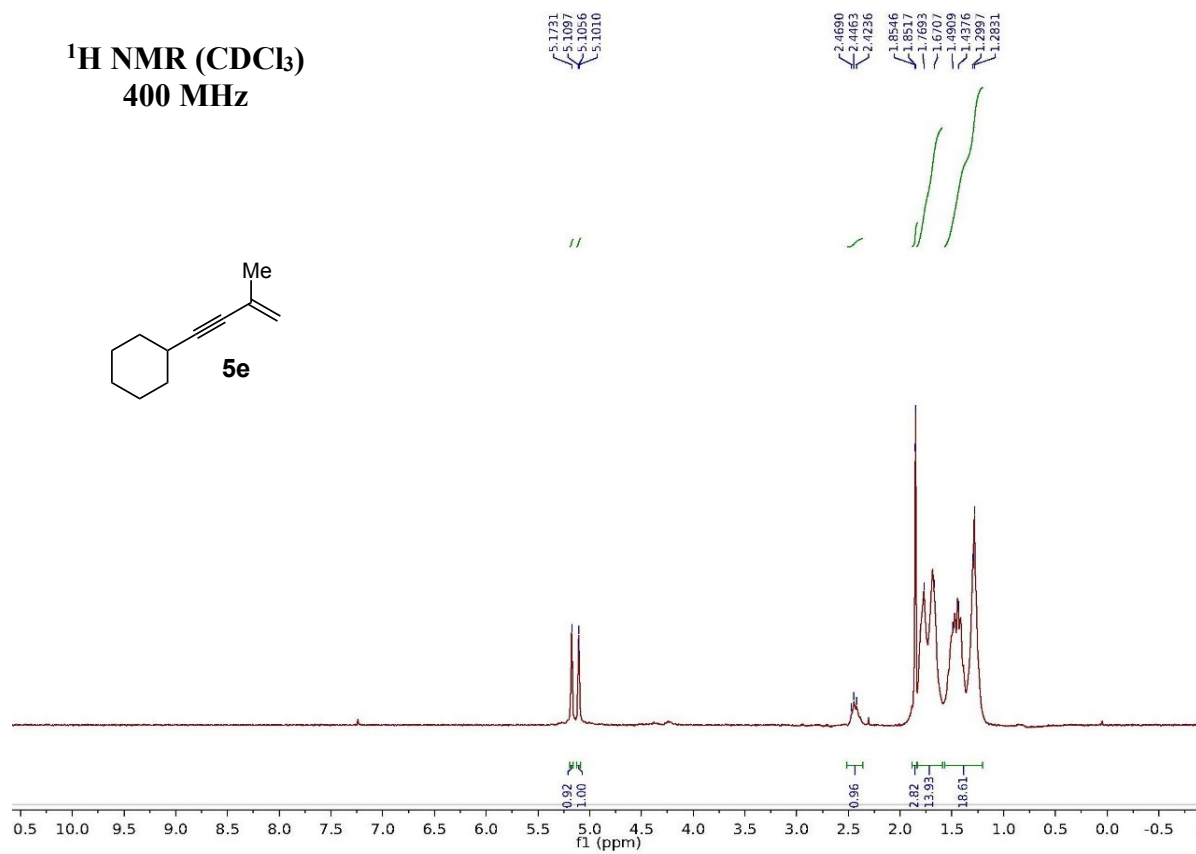

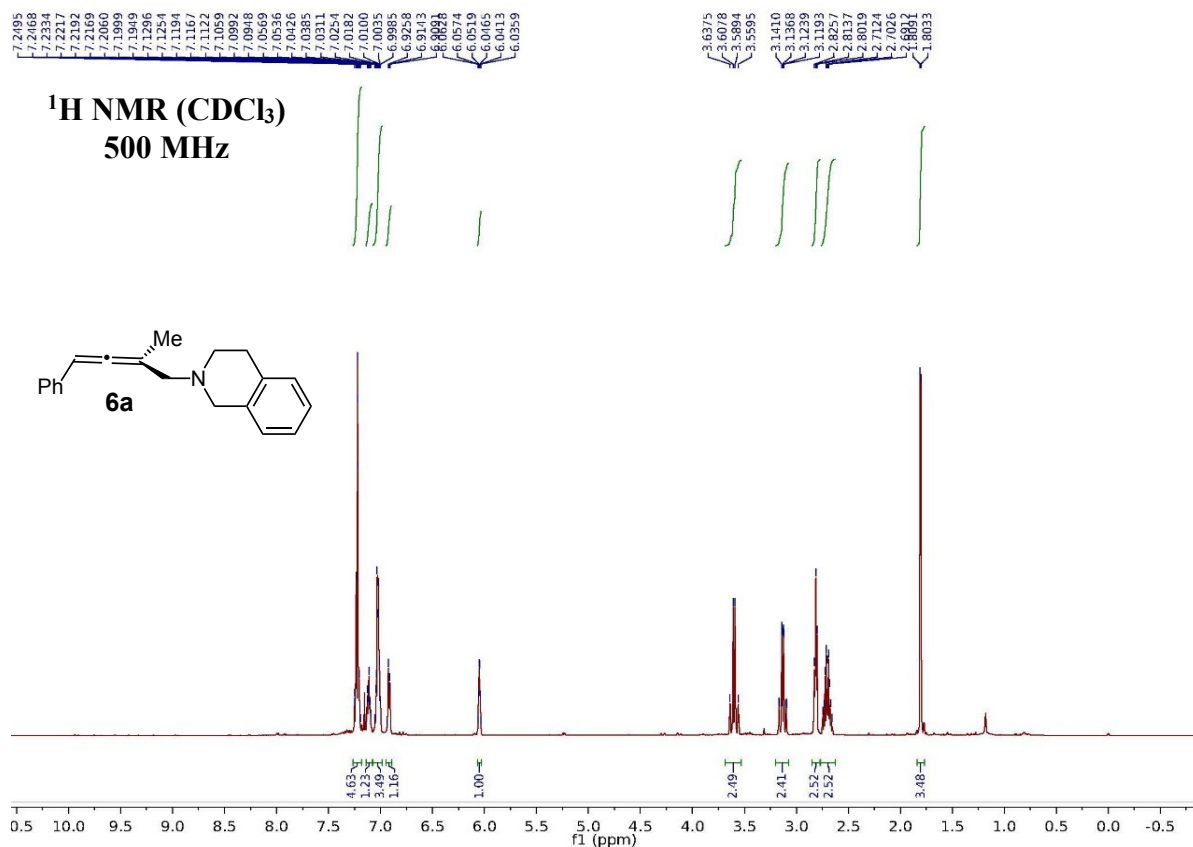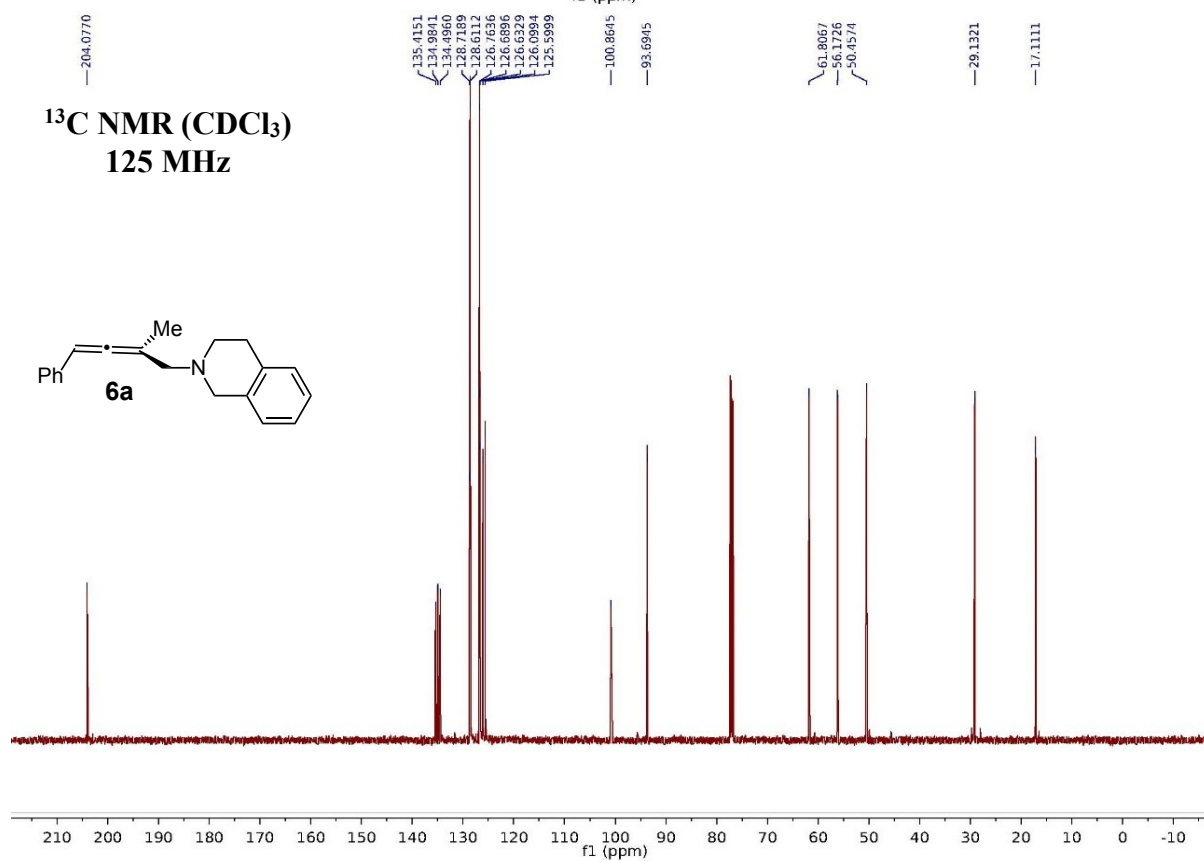

**<sup>1</sup>H NMR (CDCl<sub>3</sub>)  
500 MHz**

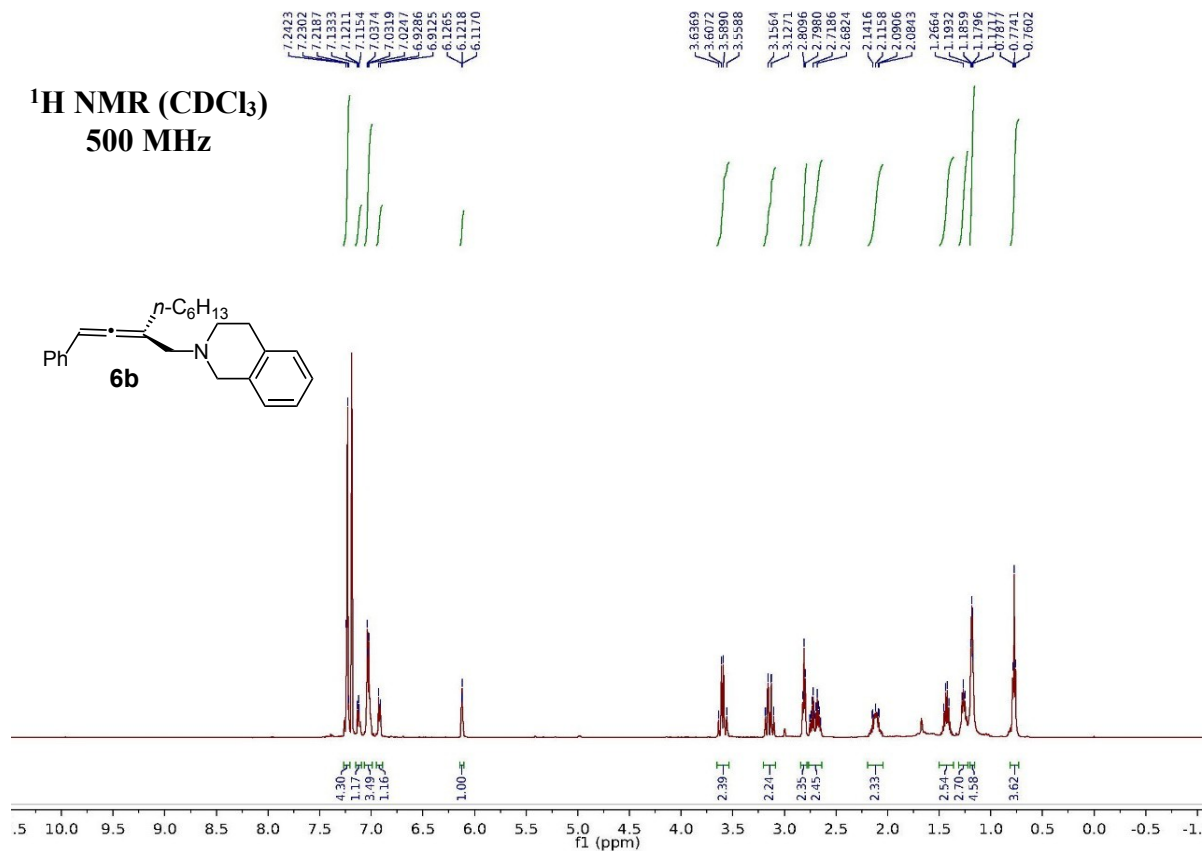

**<sup>13</sup>C NMR (CDCl<sub>3</sub>)  
125 MHz**

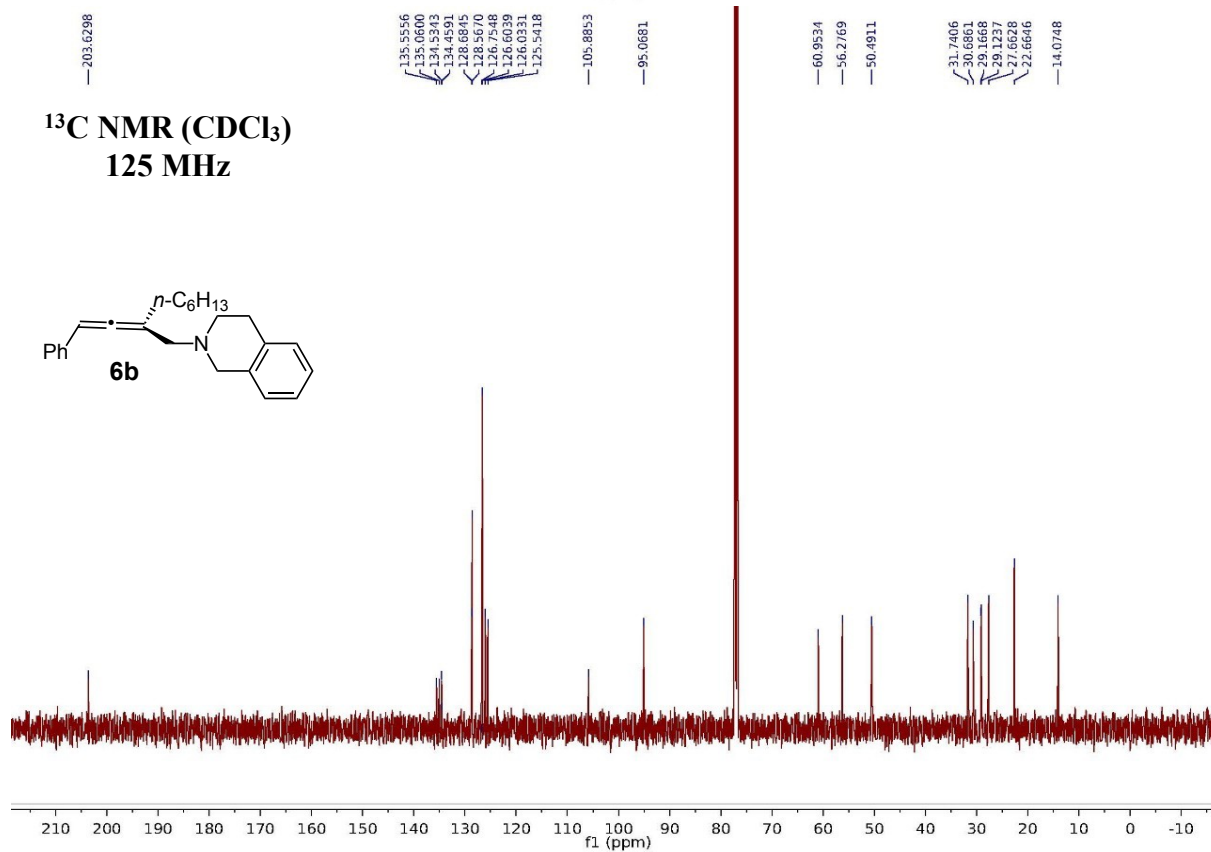



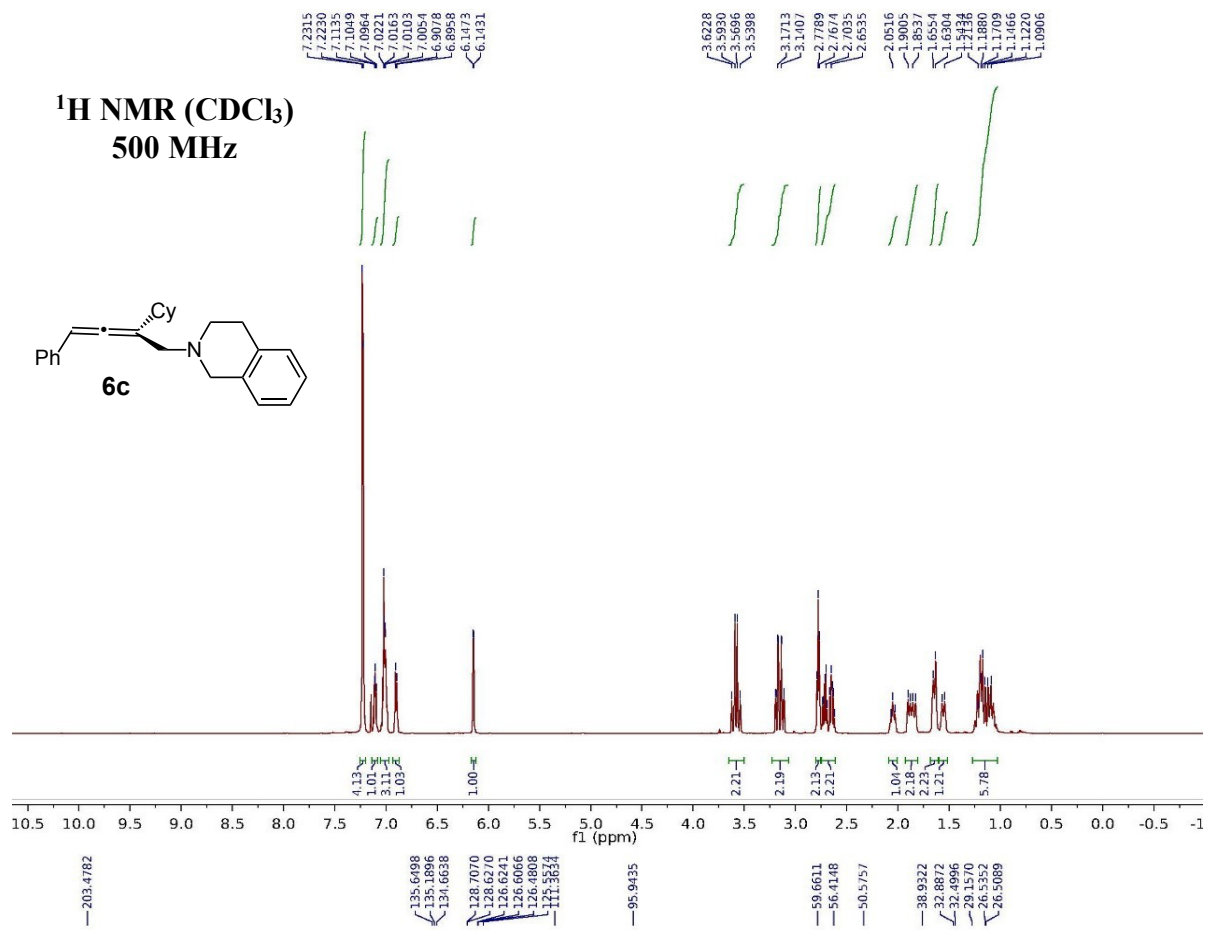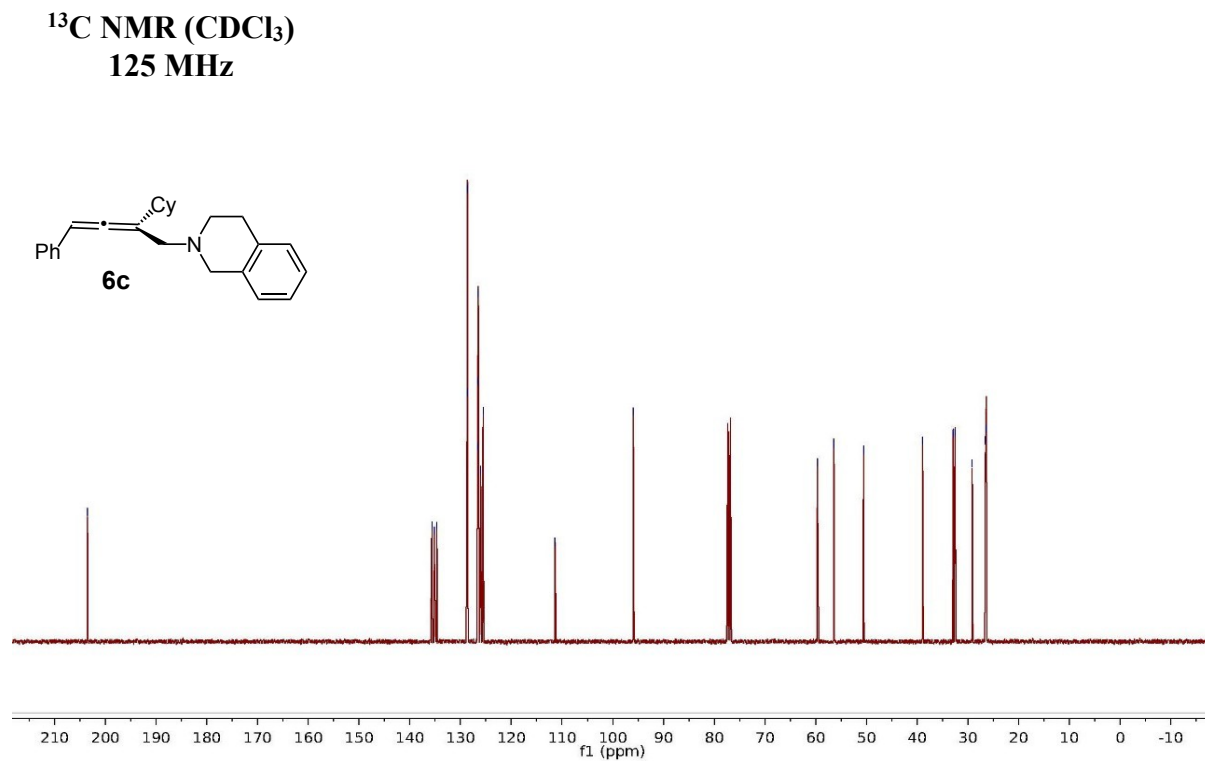

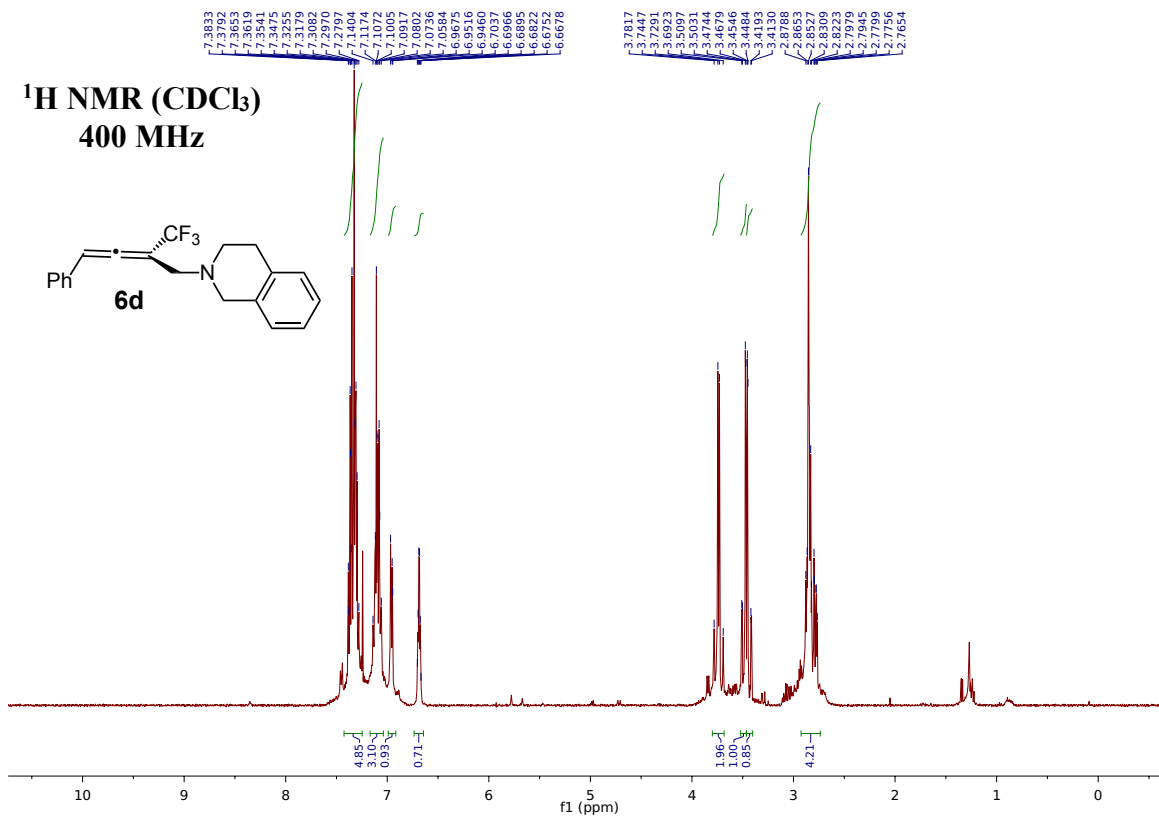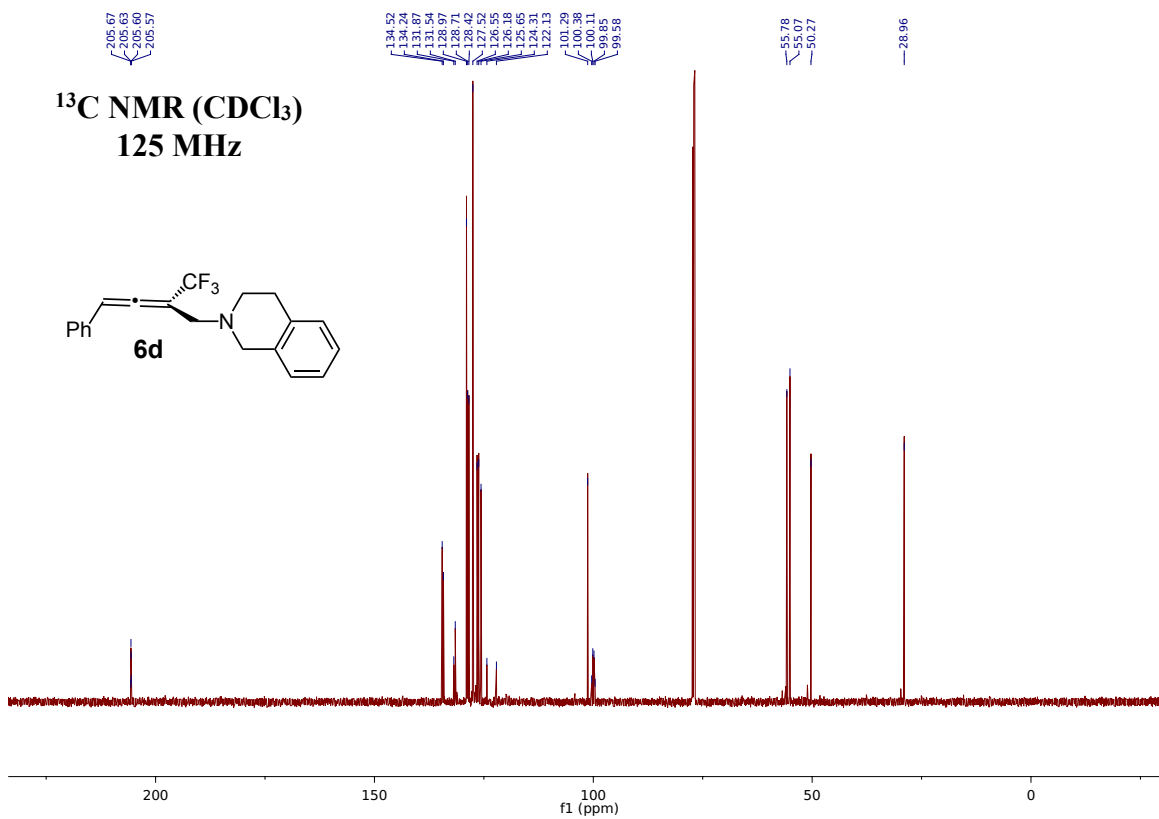

$^{19}\text{F}$  NMR ( $\text{CDCl}_3$ )  
376 MHz

-62.4508  
-62.4992

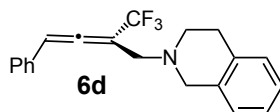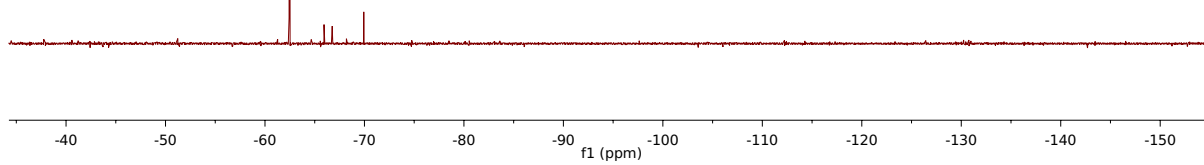

**<sup>1</sup>H NMR (CDCl<sub>3</sub>)  
500 MHz**

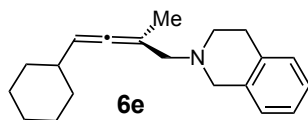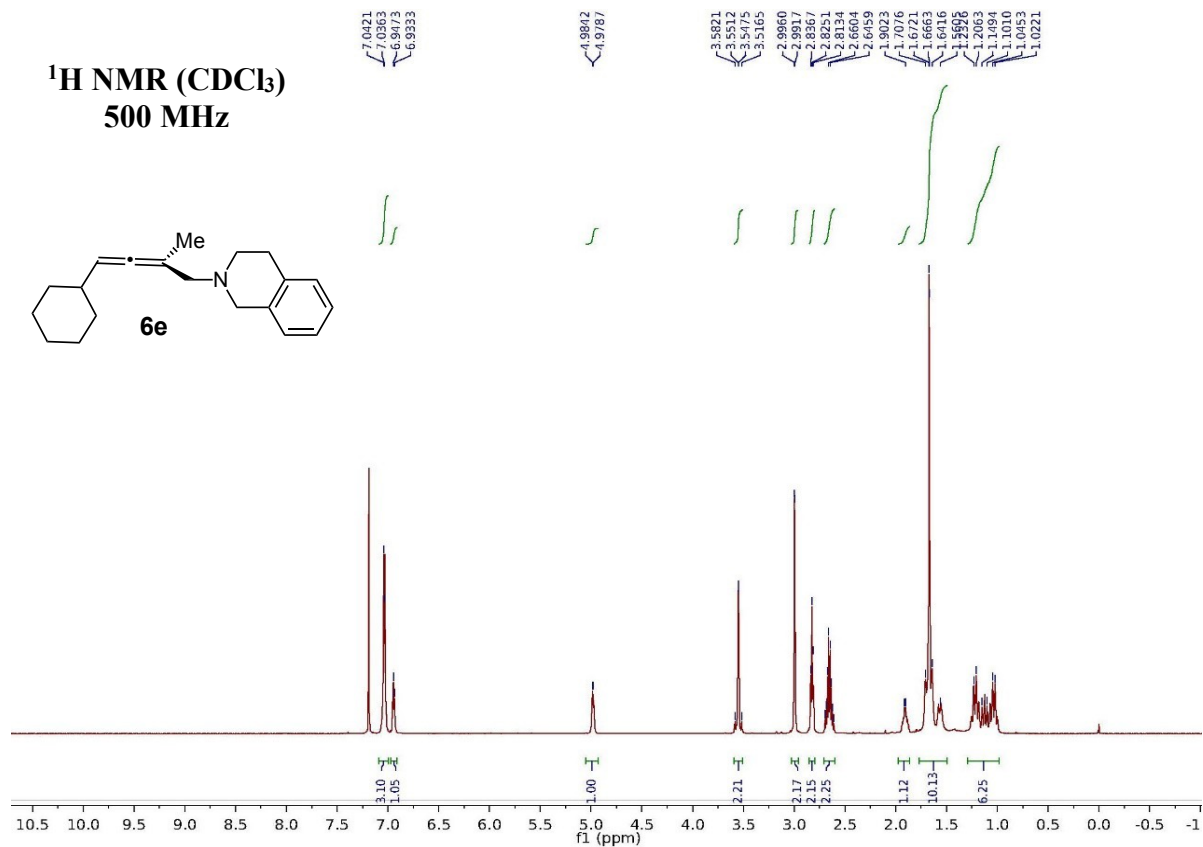

**<sup>13</sup>C NMR (CDCl<sub>3</sub>)  
125 MHz**

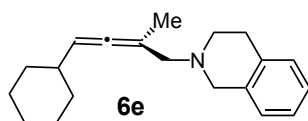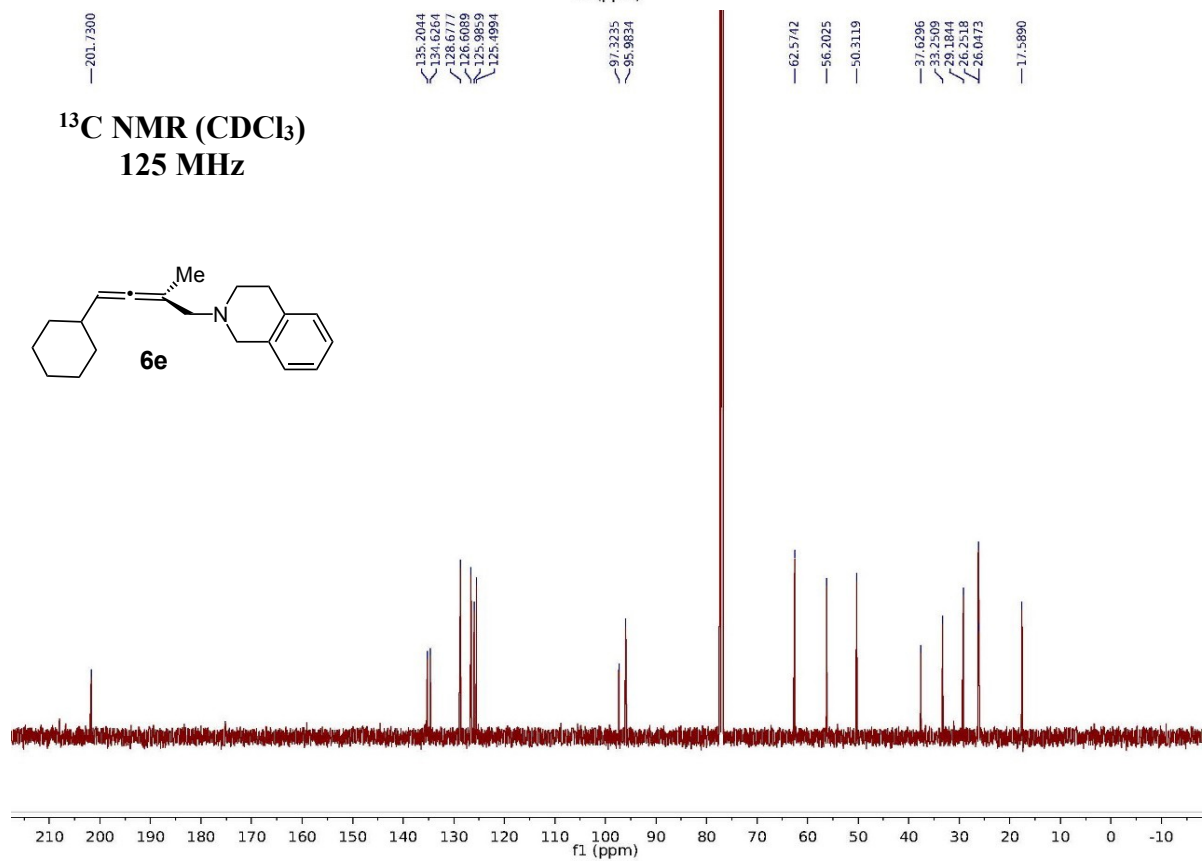

$^1\text{H}$  NMR ( $\text{CDCl}_3$ )  
400 MHz

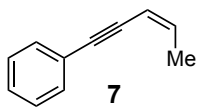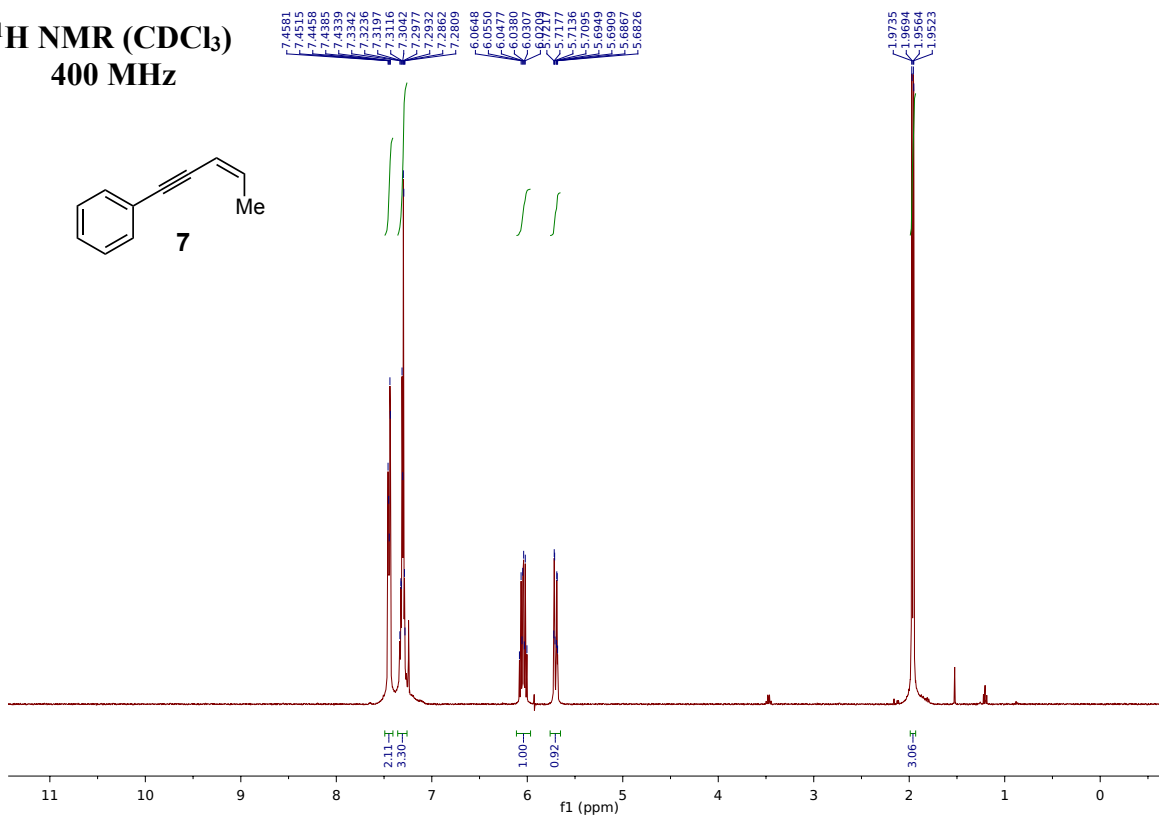

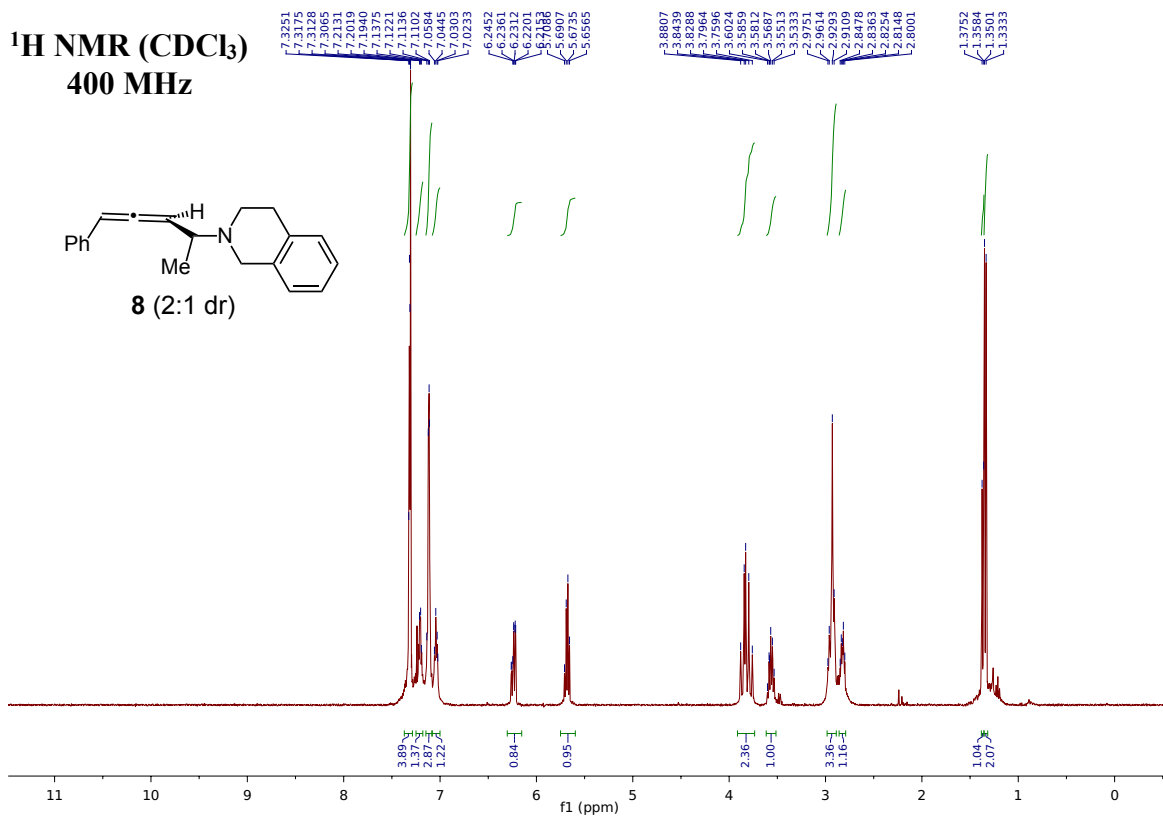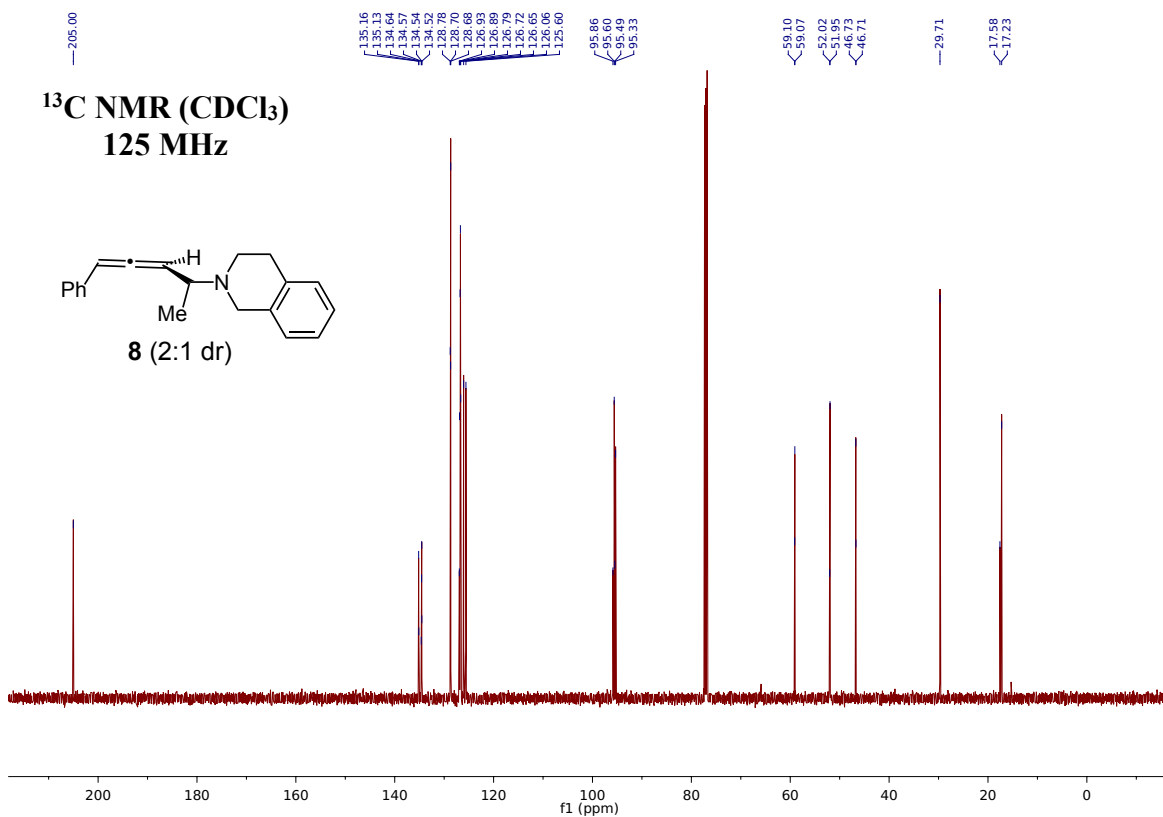

$^1\text{H}$  NMR ( $\text{CDCl}_3$ )  
400 MHz

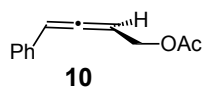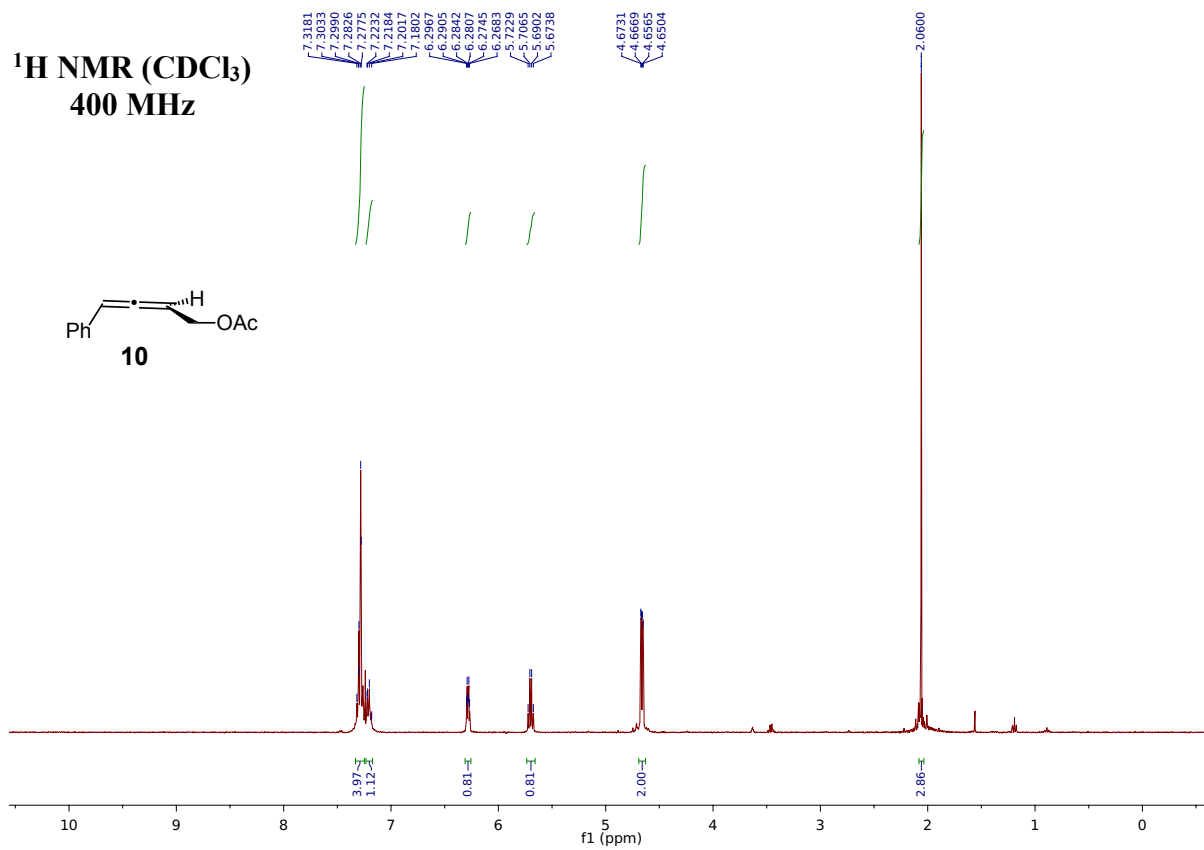

$^1\text{H}$  NMR ( $\text{CDCl}_3$ )  
400 MHz

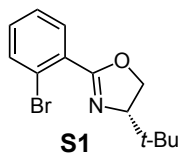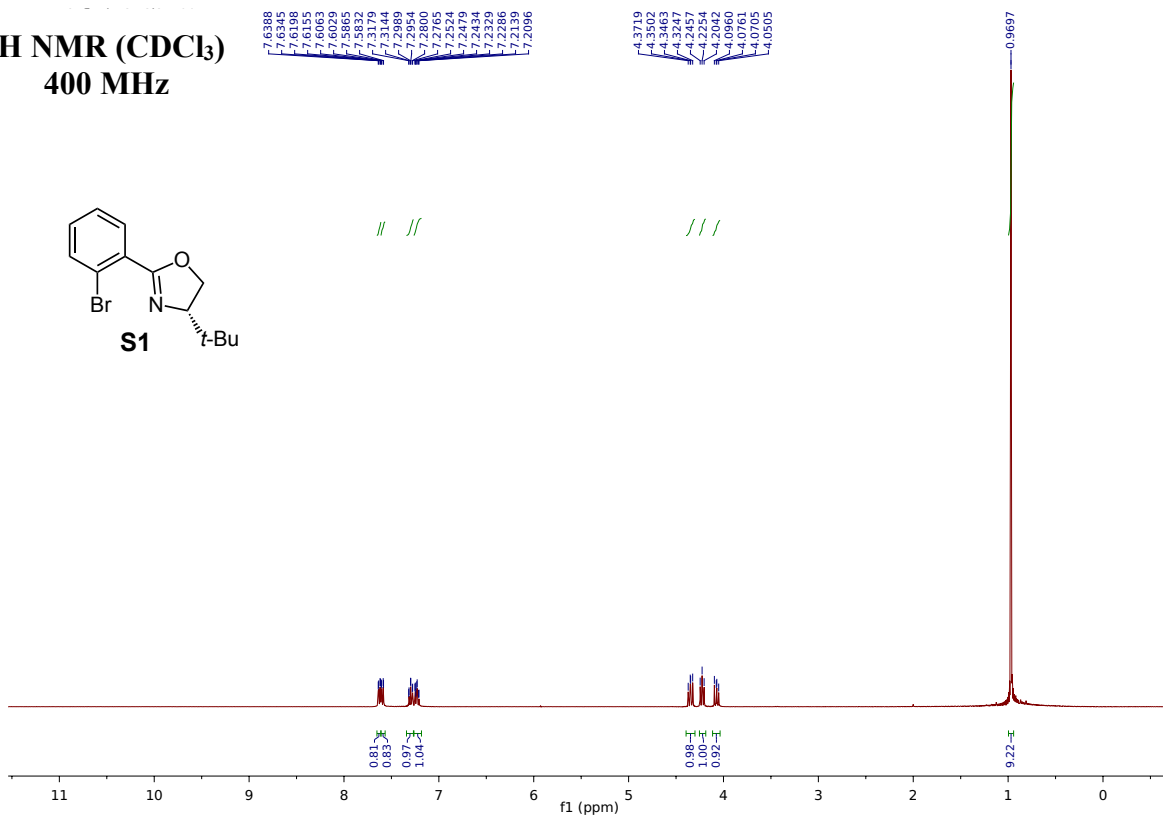



$^1\text{H}$  NMR ( $\text{CDCl}_3$ )  
400 MHz

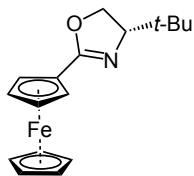

S2

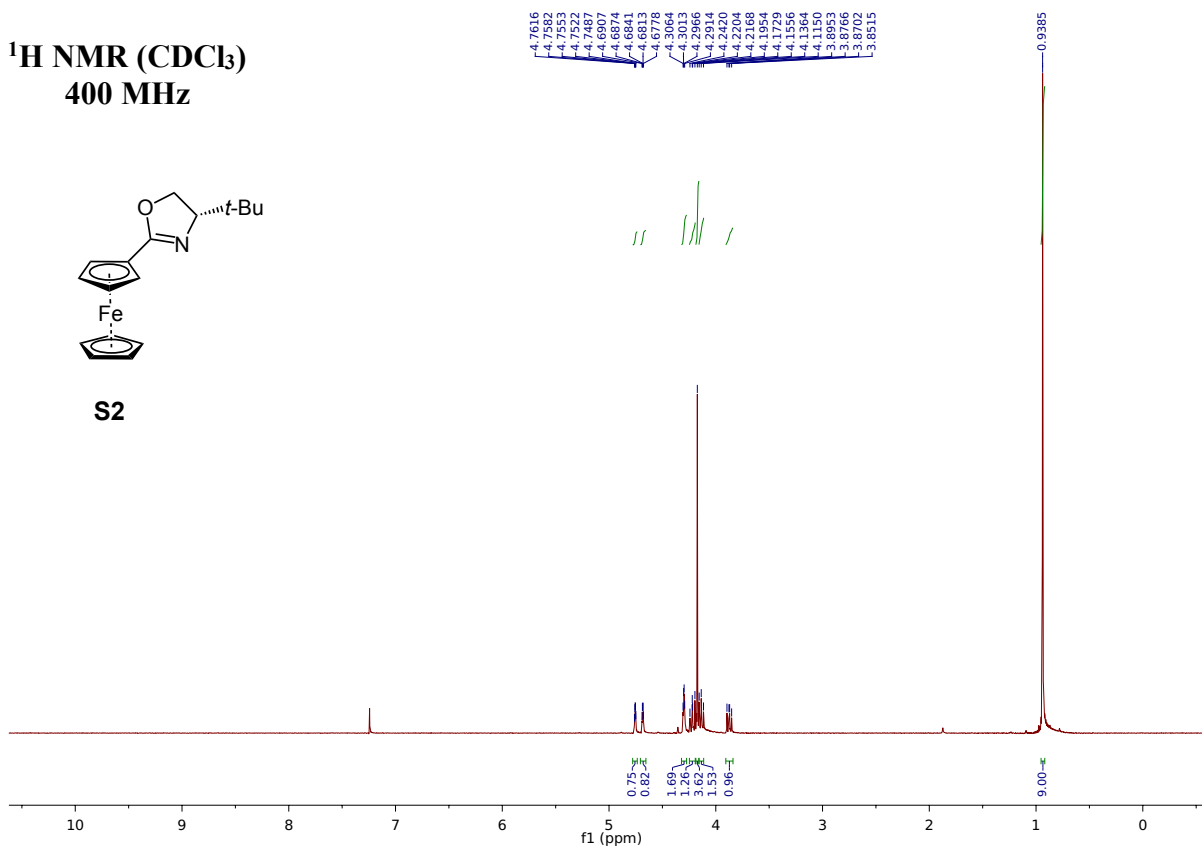

$^1\text{H}$  NMR ( $\text{CDCl}_3$ )  
400 MHz

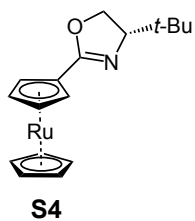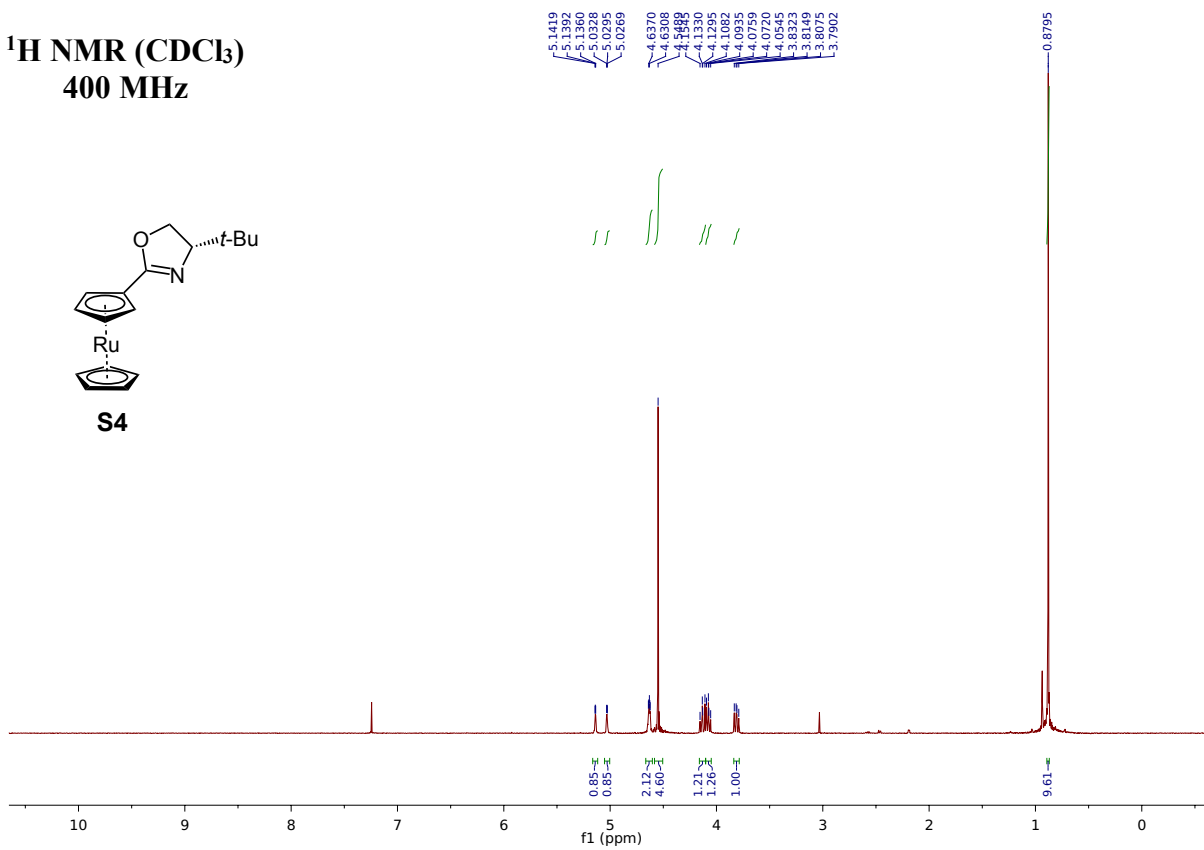

**$^1\text{H}$  NMR (CDCl<sub>3</sub>)  
400 MHz**

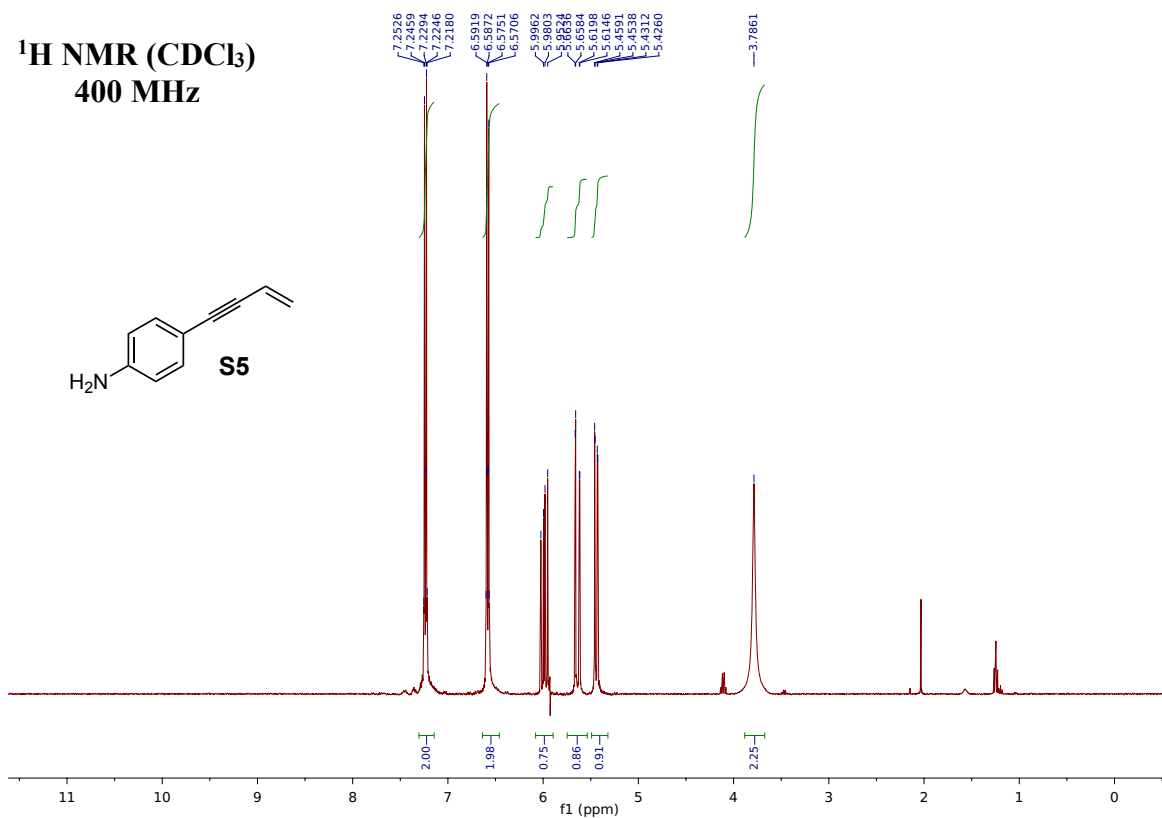

**$^{13}\text{C}$  NMR (CDCl<sub>3</sub>)  
125 MHz**

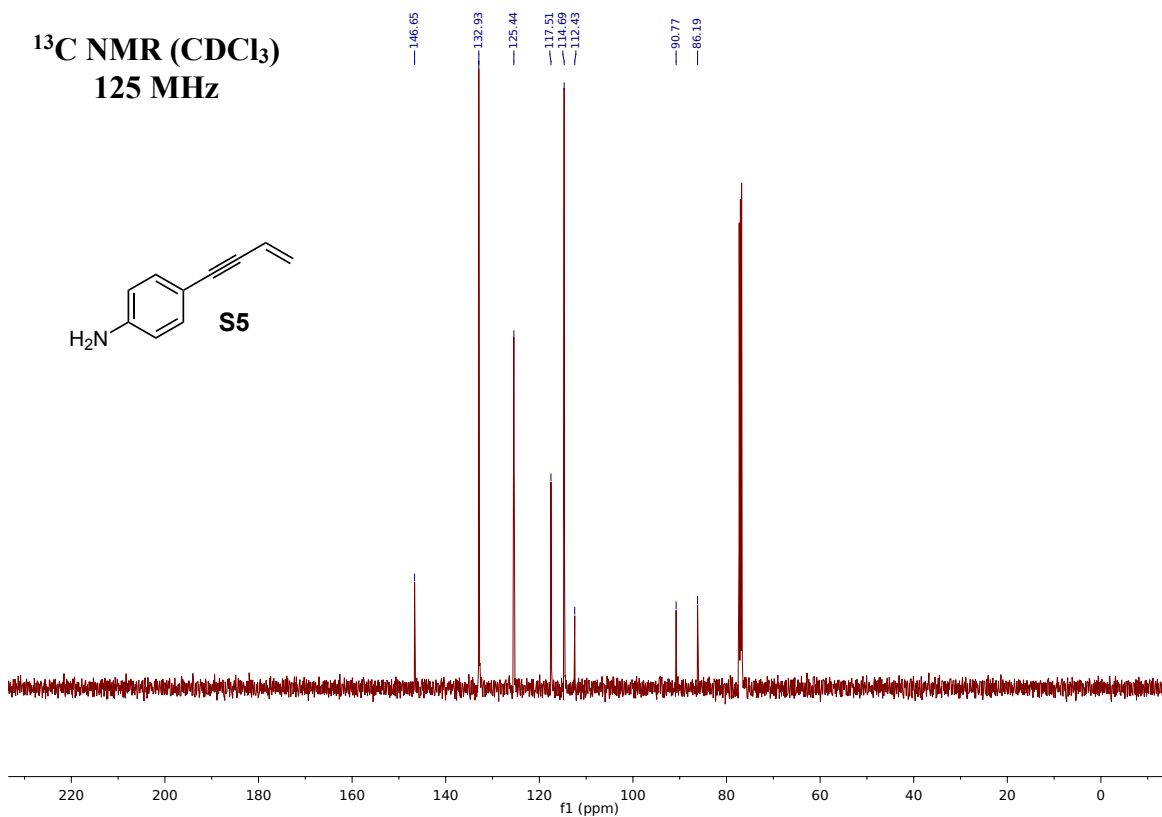

$^1\text{H}$  NMR ( $\text{CDCl}_3$ )  
400 MHz

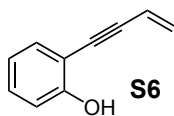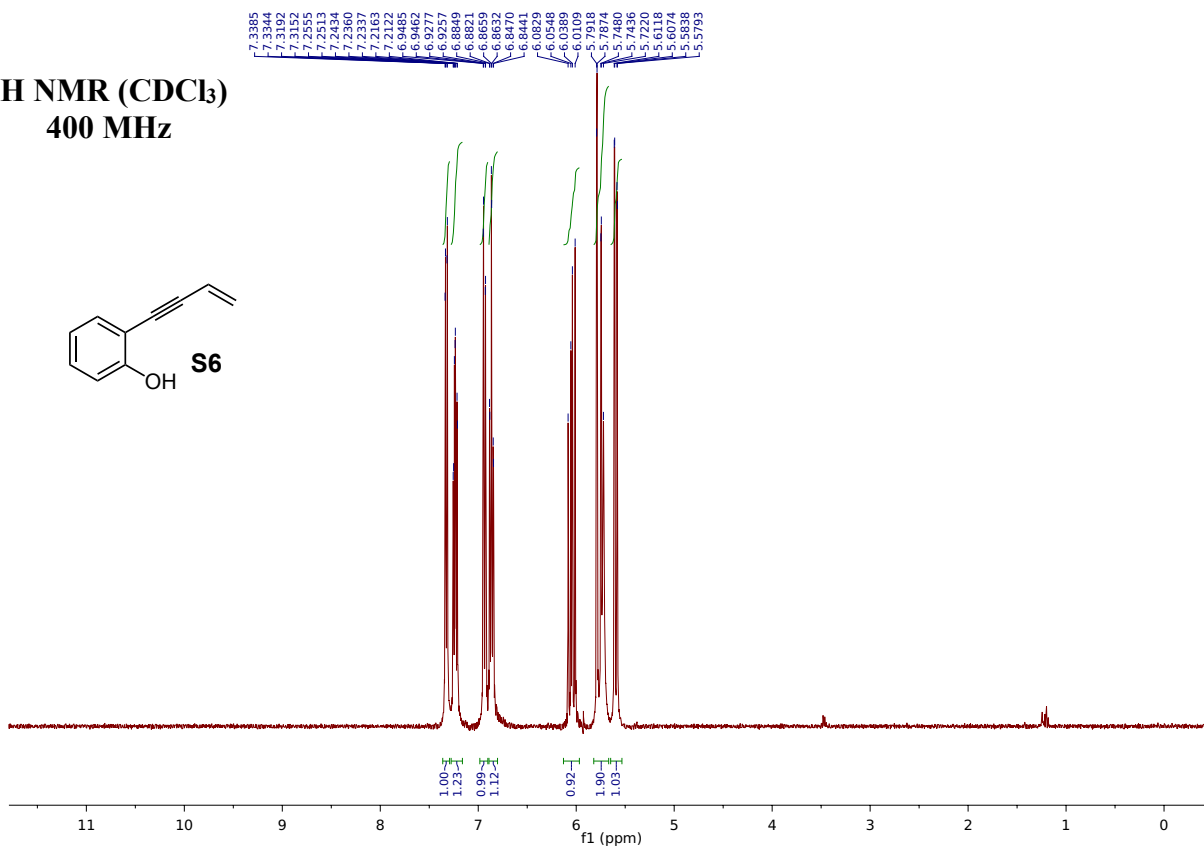

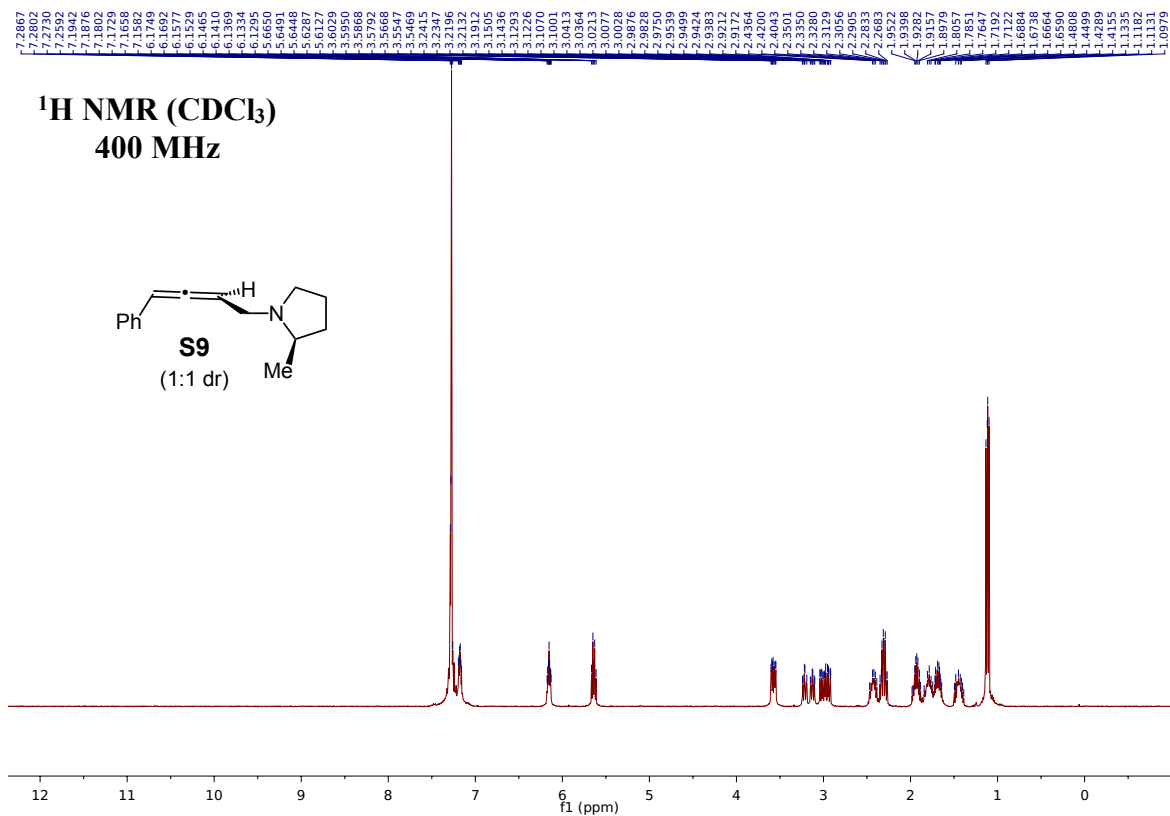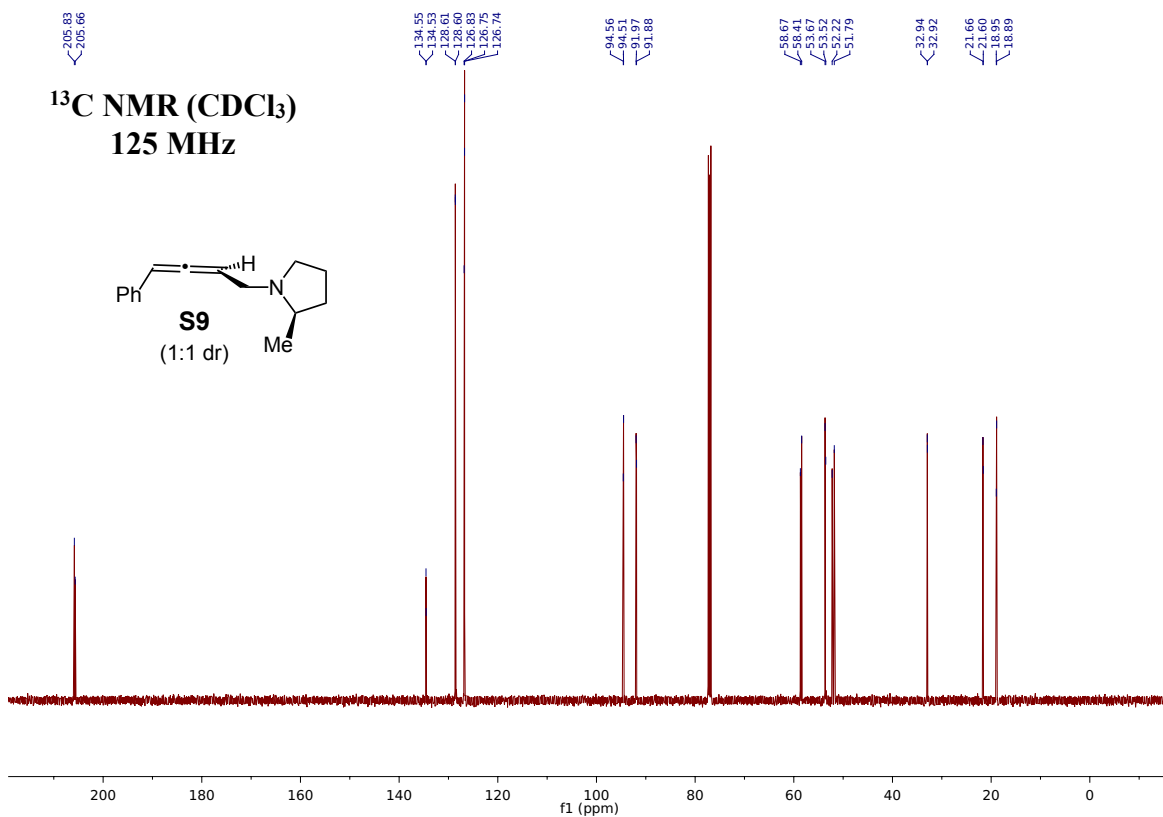

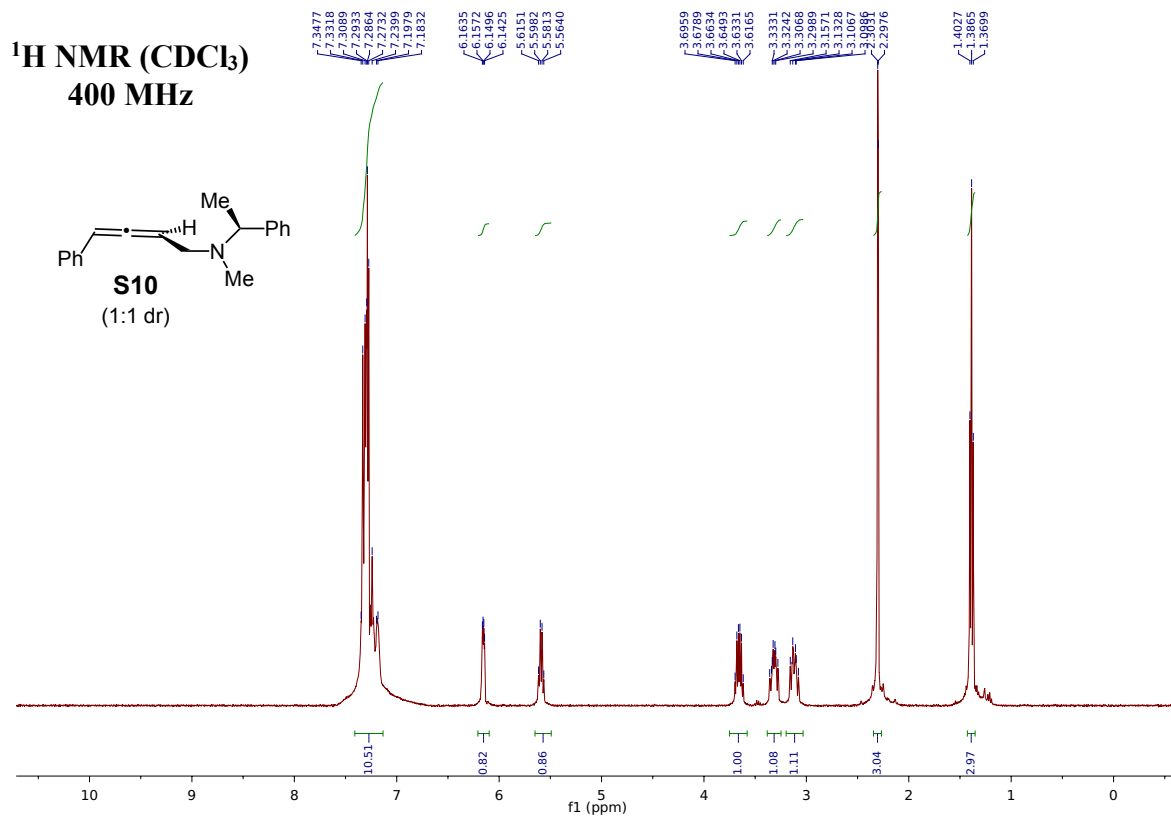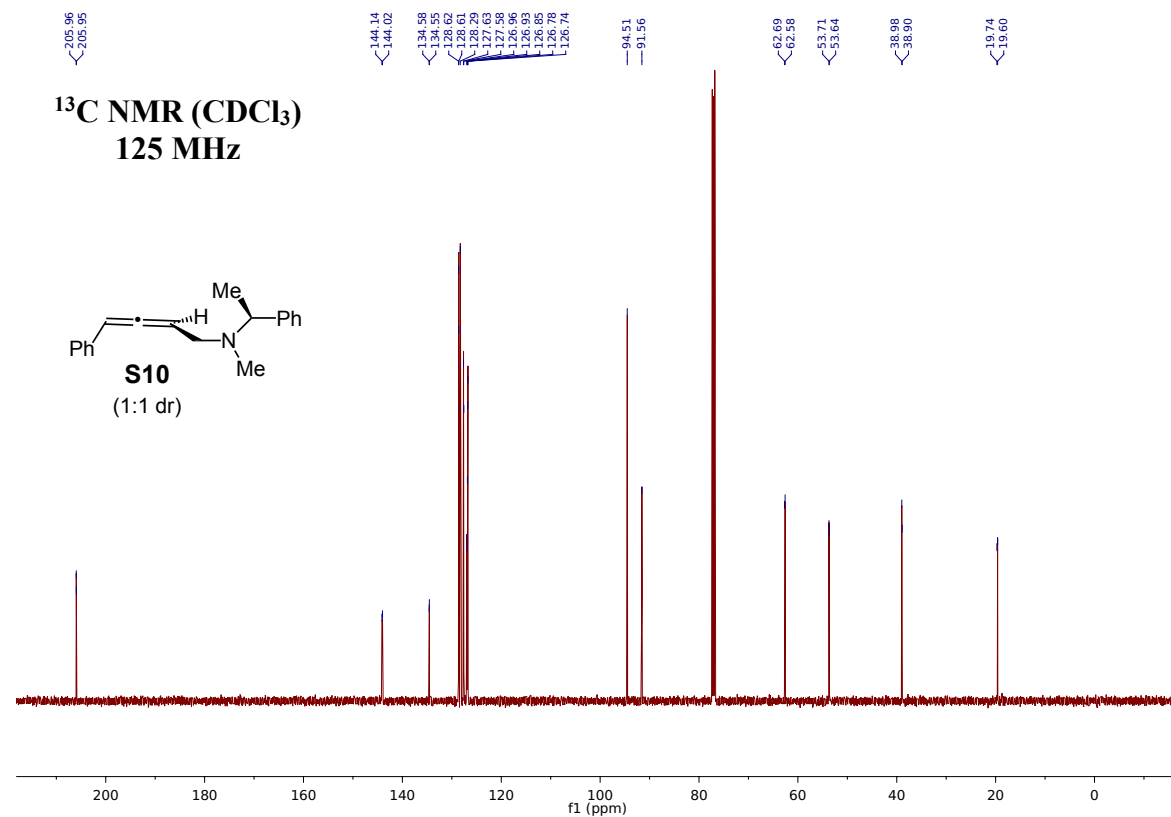

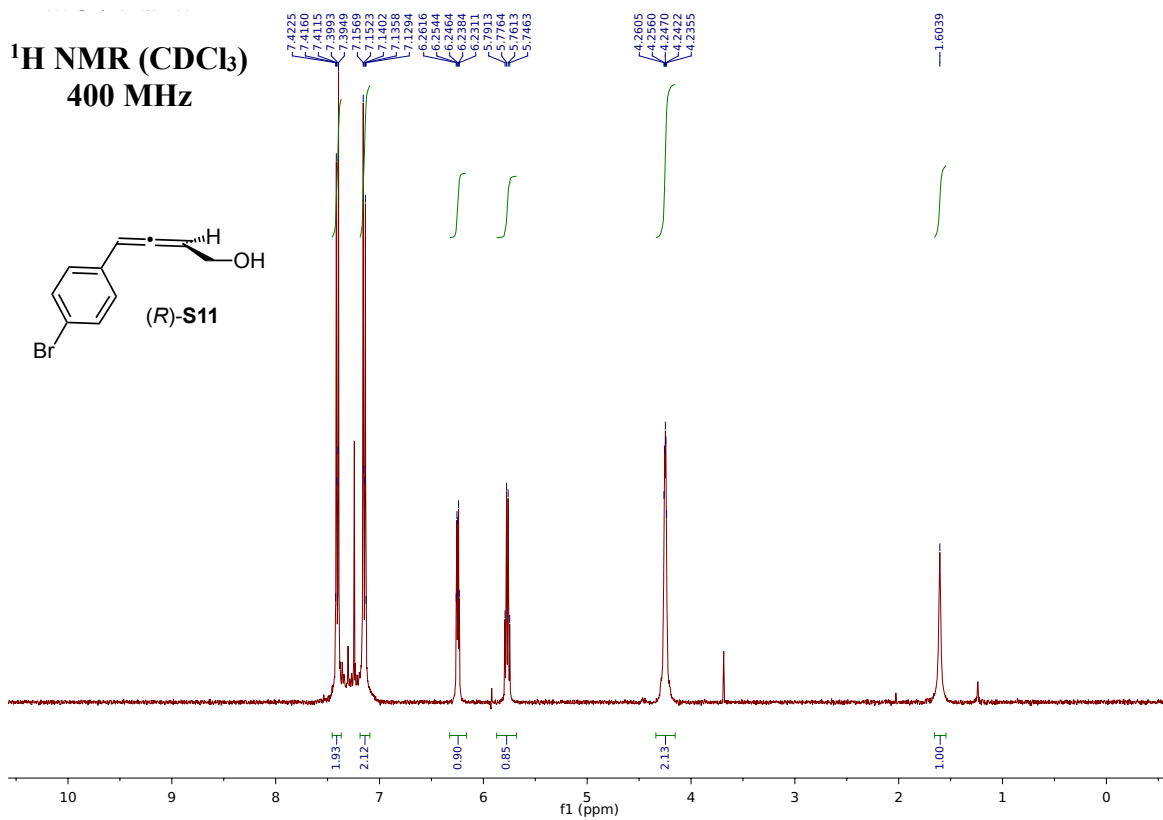

$^1\text{H NMR (CDCl}_3)$   
400 MHz

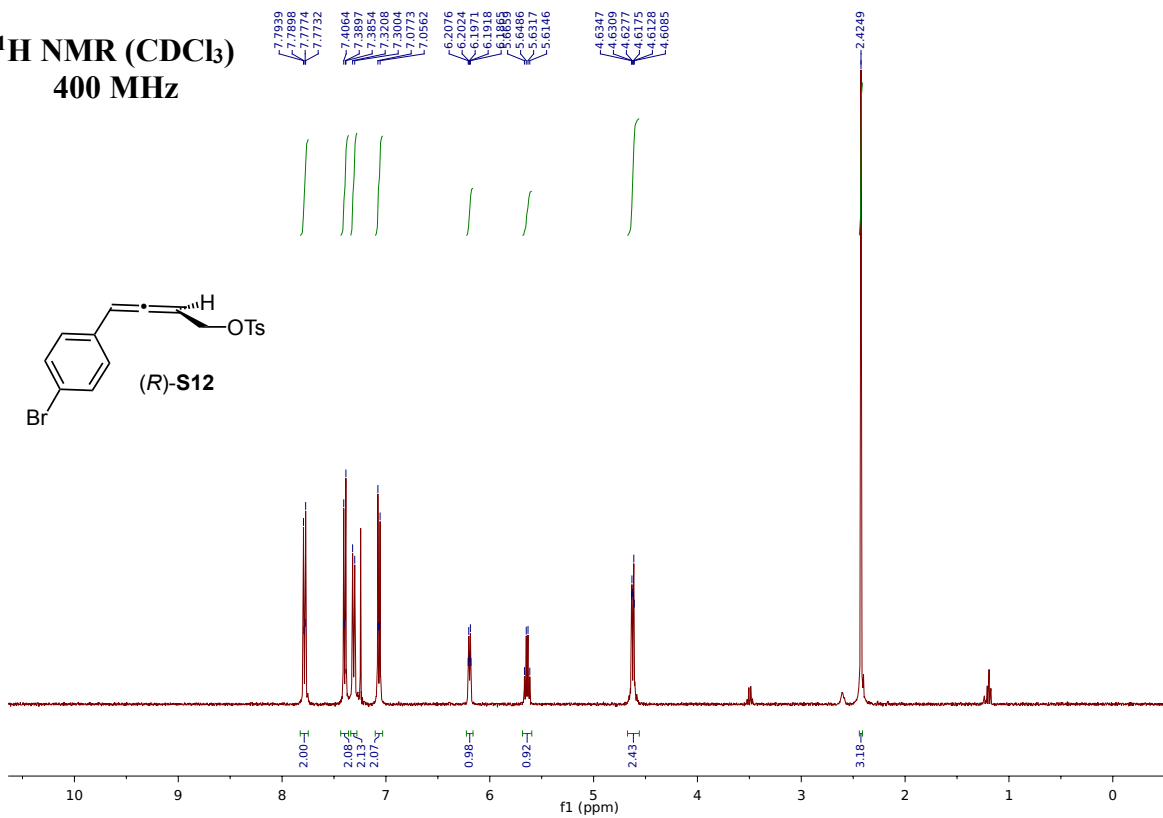



$^1\text{H}$  NMR ( $\text{CDCl}_3$ )  
400 MHz

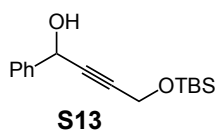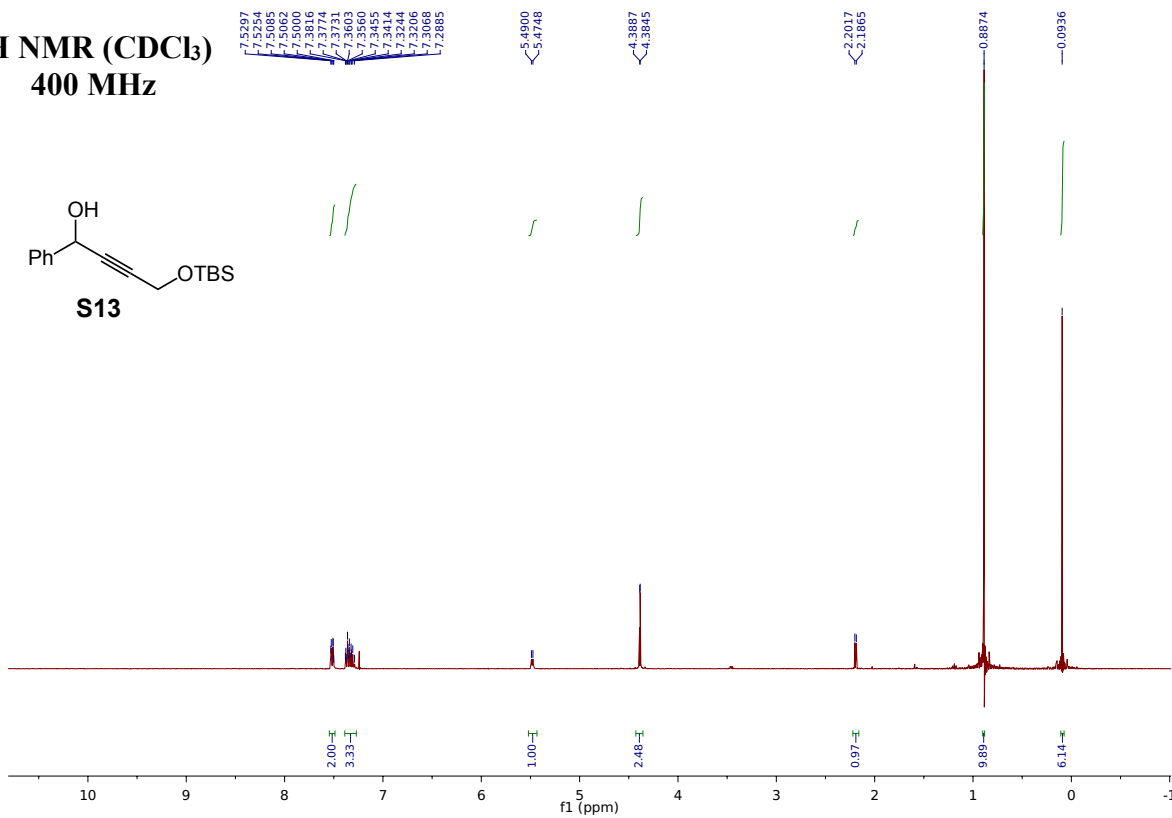

$^1\text{H}$  NMR ( $\text{CDCl}_3$ )  
400 MHz

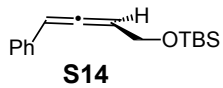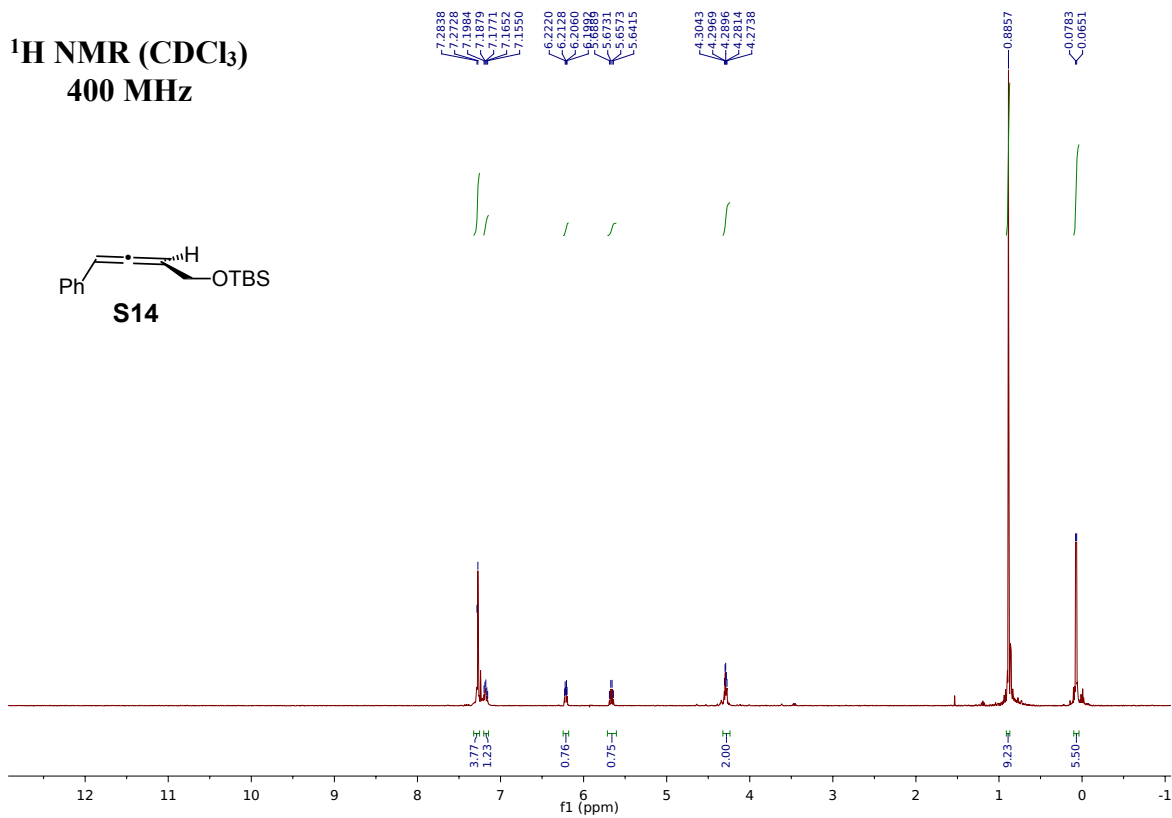

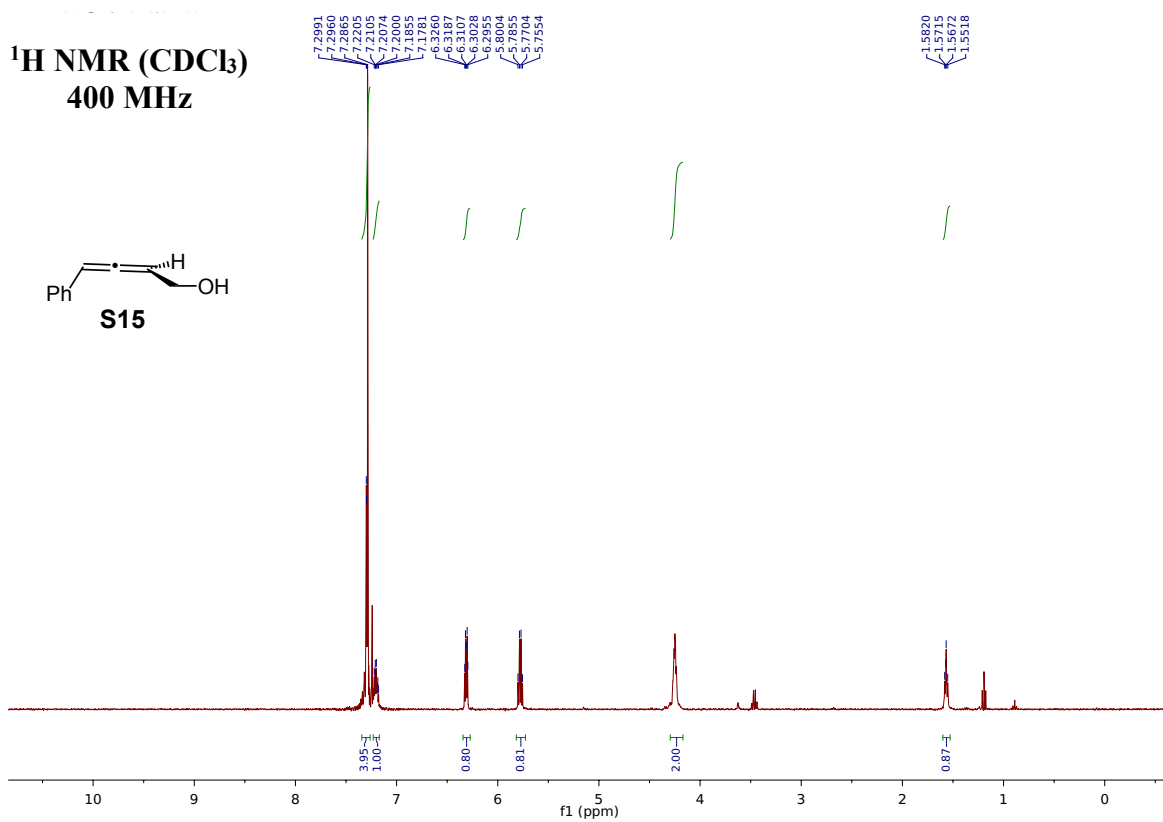

**<sup>1</sup>H NMR (CDCl<sub>3</sub>)  
400 MHz**

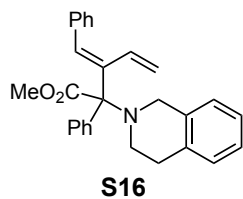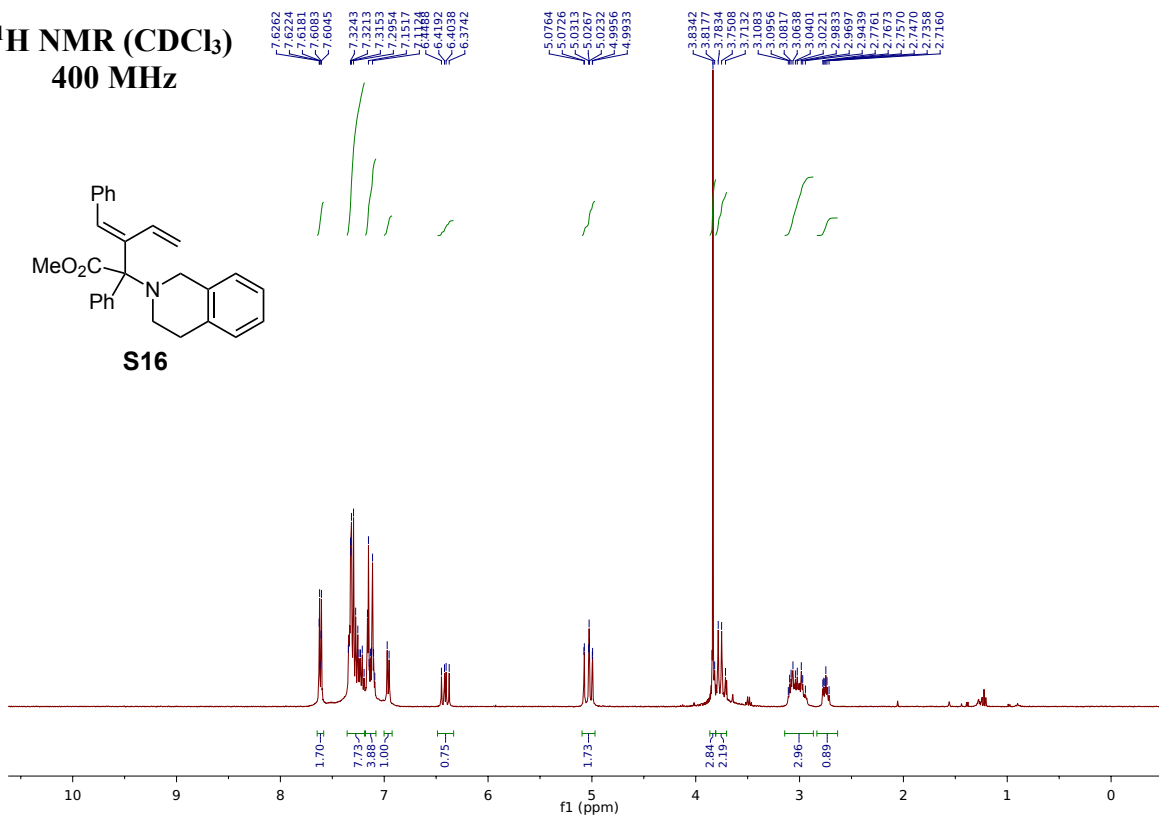

**<sup>13</sup>C NMR (CDCl<sub>3</sub>)  
125 MHz**

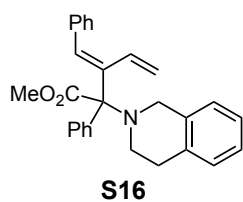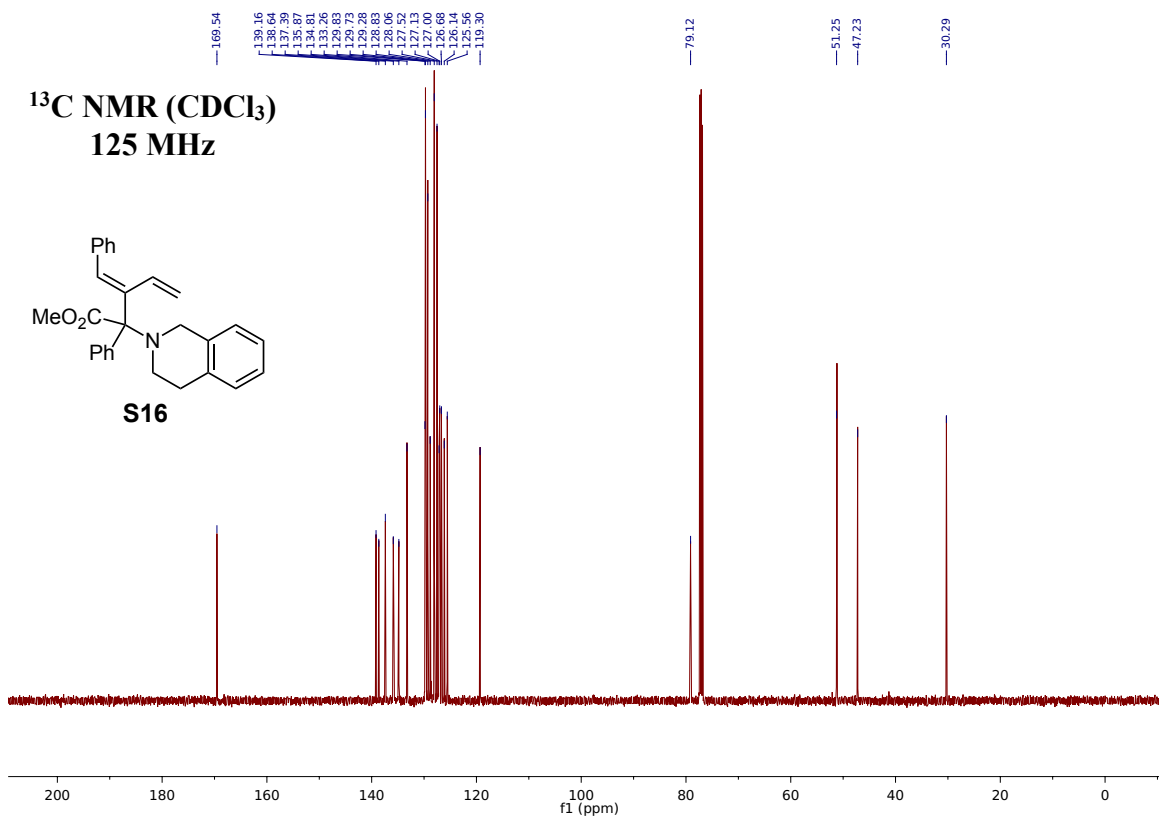

**<sup>1</sup>H NMR (CDCl<sub>3</sub>)  
400 MHz**

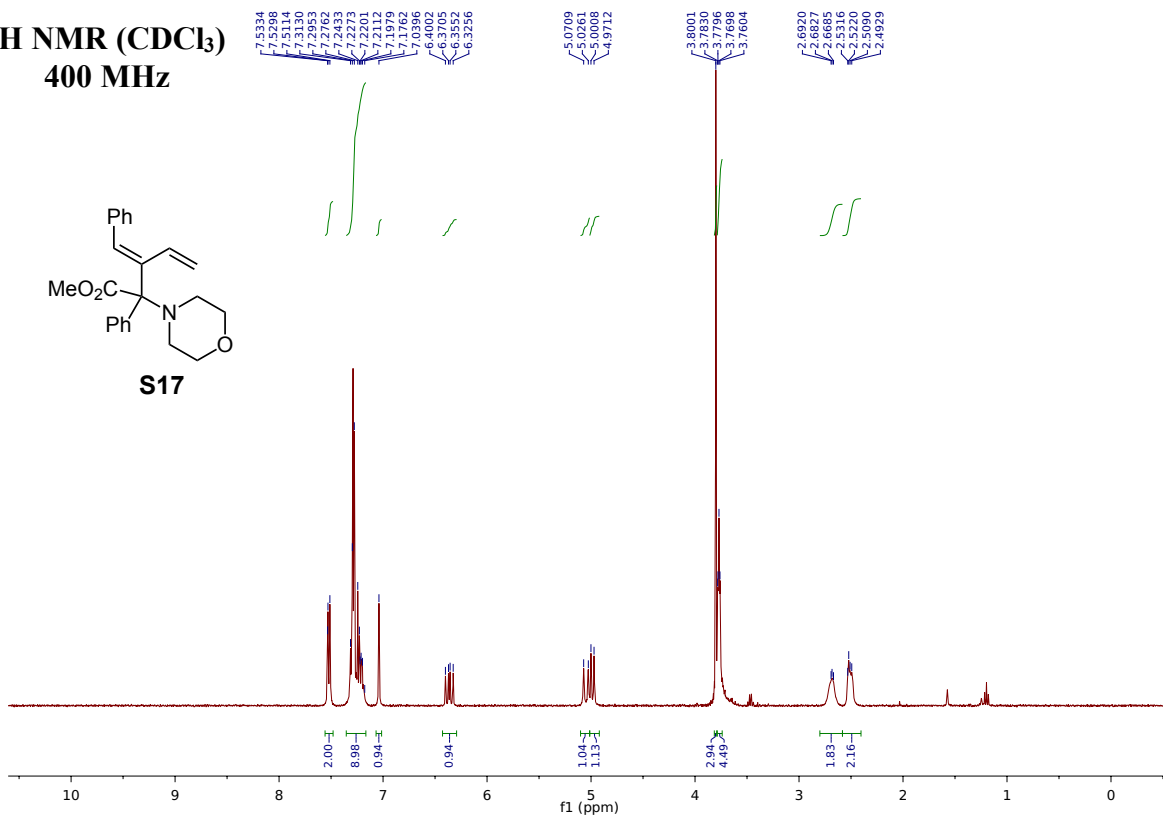

**<sup>13</sup>C NMR (CDCl<sub>3</sub>)  
125 MHz**

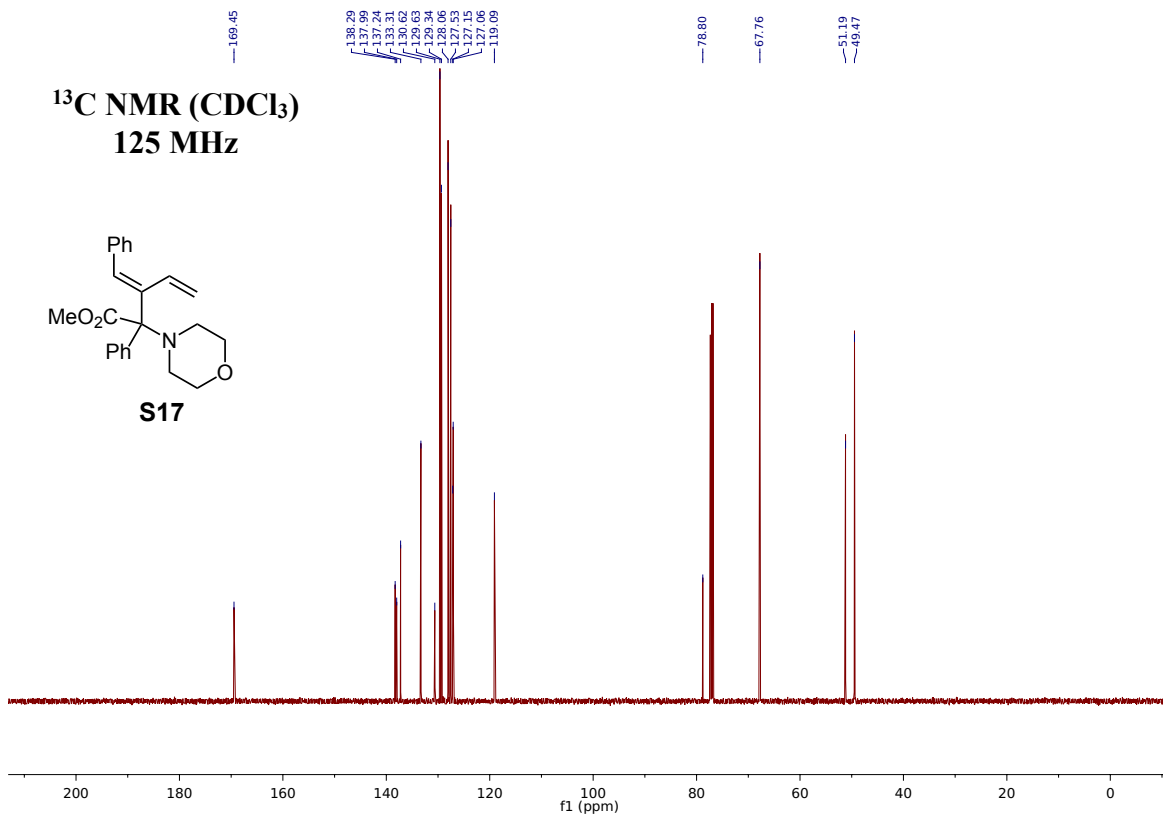

NOESY (CDCl<sub>3</sub>)  
500 MHz

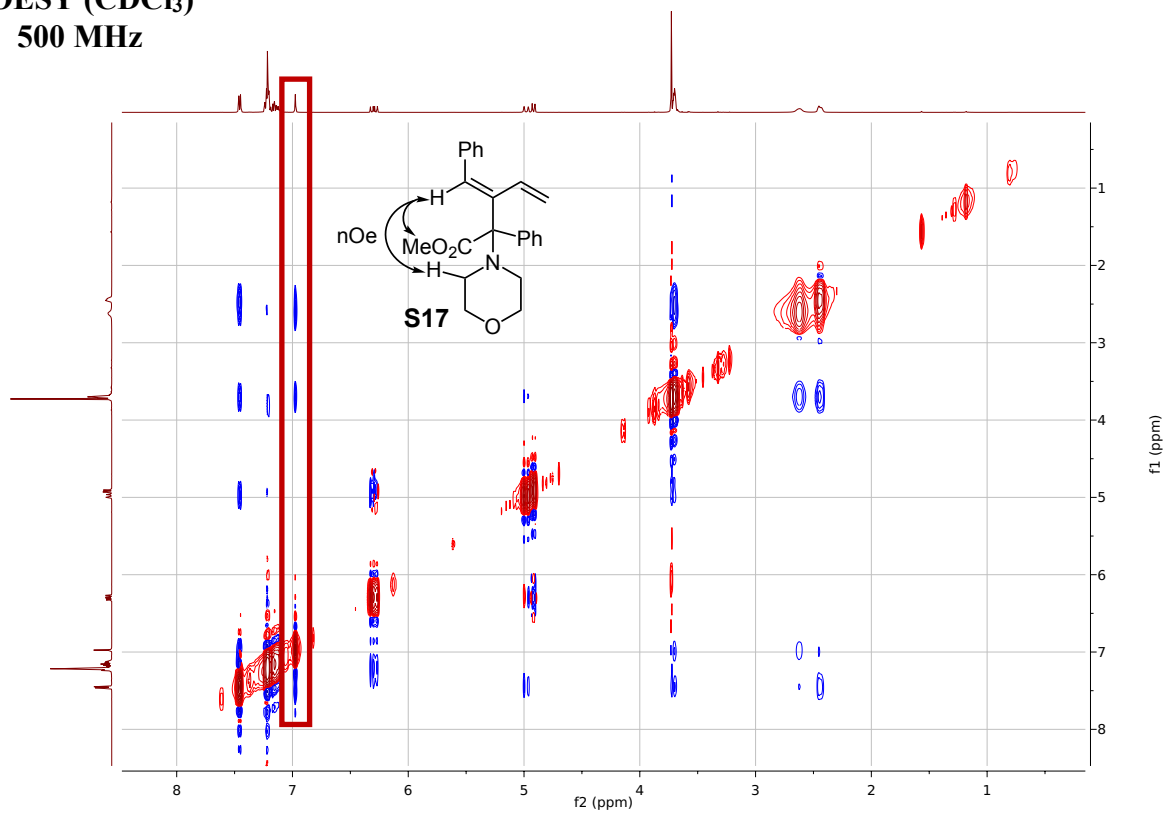

Supplement: NIHMS1033391-supplement-SI_Part_B.pdf [file NIHMS1033391-supplement-SI_Part_B.pdf]
